# Supplementary material for: The solvent-controlled Rh(iii)-catalyzed switchable [4+2] annulation of 2-arylIndoles with iodonium ylides
Source: Royal Society of Chemistry journal article supplement (doi:10.1039/d2cc01386j), 2022-01-01

*Supporting Information*

**Solvent Controlled Rh(III)-Catalyzed Switchable [4+2] Annulation of 2-Arylindoles with Iodonium Ylides**

Saiprasad Nunewar<sup>a</sup>, Sanjeev Kumar,<sup>a</sup> Pendum Priyanka,<sup>a</sup> Pradeep Girase<sup>a</sup> and Vinaykumar Kanchupalli<sup>\*[a]</sup>

<sup>a</sup>Department of Chemical Sciences, National Institute of Pharmaceutical Education and Research (NIPER), Hyderabad, 500037, Telangana, India.

|     |                                                                  |    |
|-----|------------------------------------------------------------------|----|
| 1.  | General methods                                                  | 2  |
| 2.  | Preparation of starting precursors                               | 3  |
| 3.  | Optimization studies                                             | 4  |
|     | (a) Screening of additive, base, solvent and temperature         | 4  |
|     | (b) Screening of transition-metal catalyst for product <b>3a</b> | 6  |
|     | (c) Screening of transition-metal catalyst for product <b>4a</b> | 7  |
| 4.  | Mechanistic studies                                              | 8  |
|     | 4.1 Mechanistic studies for product <b>3a</b>                    | 8  |
|     | 4.2 Mechanistic studies for product <b>4a</b>                    | 13 |
|     | 4.3 Studies on directing groups                                  | 18 |
| 5.  | General procedure for product <b>3</b>                           | 22 |
| 6.  | General procedure for product <b>4</b>                           | 38 |
| 7.  | Synthetic transformations                                        | 50 |
| 8.  | X-ray data                                                       | 54 |
| 9.  | References                                                       | 59 |
| 10. | NMR data                                                         | 60 |

## 1. General methods

All the reactions were performed in an oven-dried glassware. Solvents were dried using standard methods. Tetrahydrofuran was dried over sodium-benzophenone ketyl. Acetonitrile and dichloromethane were distilled over calcium hydride. Unless otherwise stated, all the commercial reagents were used as received. Progress of the reaction was monitored by thin layer chromatography (Merck Silica-gel 60 F-254, 0.25 mm, pre-coated plates on alumina). Column chromatographic purifications were performed on Merck silica gel (100-200 mesh). Melting points were recorded on a digital melting point apparatus and are uncorrected.

Spectroscopic characterizations were carried at the Central Instrumentation Facility (CIF), National Institute of Pharmaceutical Education and Research (NIPER) Hyderabad.  $^1\text{H}$  NMR spectra were recorded on Bruker Avance-III FT-NMR spectrometers at 500 MHz and  $^{13}\text{C}$  NMR spectra were recorded at 125 MHz.  $^1\text{H}$  NMR chemical shifts are reported in ppm relative to the TMS ( $\delta = 0$ ) and are abbreviated as follows: s (singlet), d (doublet), t (triplet), q (quartet), m (multiplet), br (broad).  $^{13}\text{C}$  NMR chemical shifts are reported in ppm relative to the residual  $\text{CDCl}_3$  signal ( $\delta = 77.16$ ) and  $\text{DMSO}-d_6$  signal ( $\delta = 39.5$ ). IR spectra was recorded on Perkin-Elmer FT-IR spectrometer. HRMS data was obtained on Agilent Q-TOF 6540 high resolution mass spectrometers.

## 2. Preparation of starting precursors:

### 2.1 Synthesis of 2-Phenyl indole derivatives:

All the 2-Phenyl indole derivatives **1a-1z** were prepared according to reported literature procedure.<sup>1</sup>

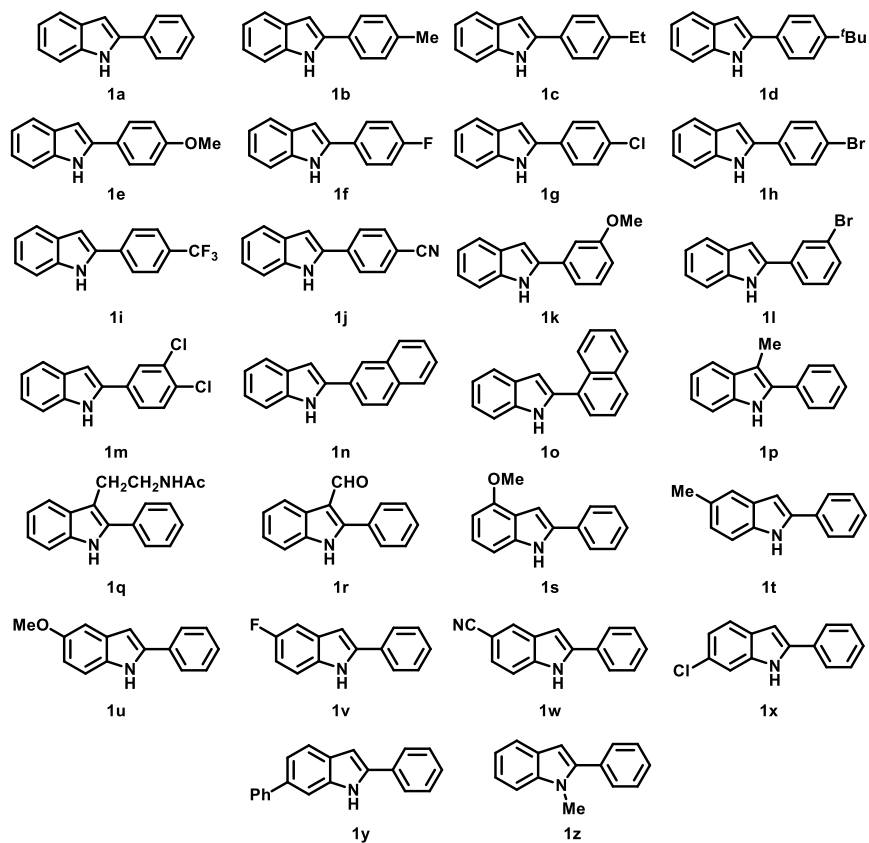

## 2.2 Synthesis of hypervalent iodonium ylides:

All the hypervalent iodonium ylides **2a-2m** were prepared by reported literature.<sup>2</sup>

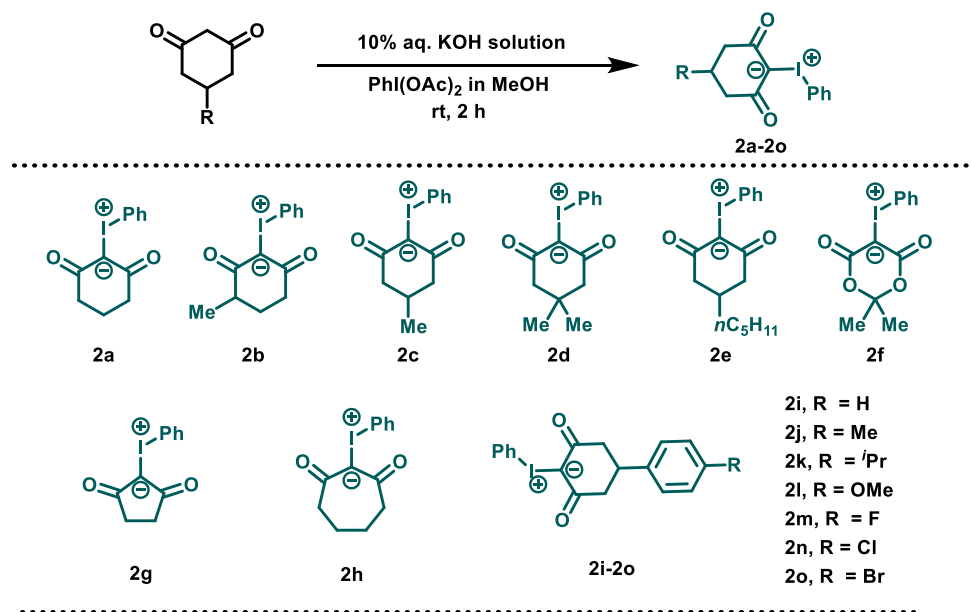

## 3. Optimization studies:

### (a) Screening of Additive, Base, solvent, and temperature

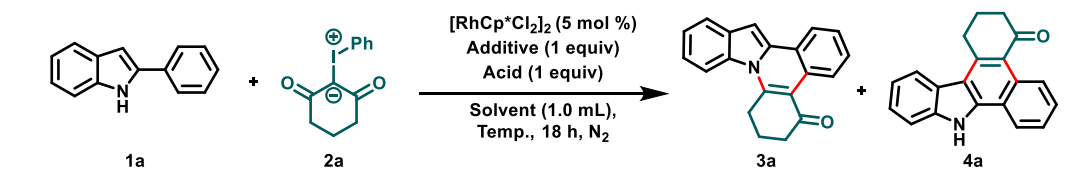

| Entry | Additive             | Acid or base | Solvent | Temp. (°C) | 3a (%) <sup>b</sup> | 4a (%) <sup>b</sup> |
|-------|----------------------|--------------|---------|------------|---------------------|---------------------|
| 1     | CsOPiv               | -            | DCM     | 45         | 53                  | trace               |
| 2     | AgOAc                | -            | DCM     | 45         | 48                  | trace               |
| 3     | NaOAc                | -            | DCM     | 45         | 32                  | nd                  |
| 4     | KOAc                 | -            | DCM     | 45         | 51                  | nd                  |
| 5     | CsOAc                | -            | DCM     | 45         | 58                  | nd                  |
| 6     | KPF <sub>6</sub>     | -            | DCM     | 45         | nd                  | nd                  |
| 7     | AgSbF <sub>6</sub>   | -            | DCM     | 45         | nd                  | nd                  |
| 8     | Cu(OAc) <sub>2</sub> | -            | DCM     | 45         | nd                  | nd                  |
| 9     | AgOTf                | -            | DCM     | 45         | nd                  | nd                  |
| 10    | CsOAc                | -            | DCM     | 55         | 65                  | nd                  |

|                 |              |                                 |                   |           |           |           |
|-----------------|--------------|---------------------------------|-------------------|-----------|-----------|-----------|
| 11              | CsOAc        | -                               | DCM               | 65        | 63        | nd        |
| 12 <sup>c</sup> | CsOAc        | -                               | DCM               | 55        | 61        | nd        |
| 13 <sup>d</sup> | CsOAc        | -                               | DCM               | 55        | 51        | nd        |
| 14              | CsOAc        | AcOH                            | DCM               | 55        | 35        | nd        |
| 15              | CsOAc        | PivOH                           | DCM               | 55        | 31        | nd        |
| 16 <sup>e</sup> | CsOAc        | Ada-COOH                        | DCM               | 55        | 25        | nd        |
| 17              | CsOAc        | Na <sub>2</sub> CO <sub>3</sub> | DCM               | 55        | 62        | nd        |
| <b>18</b>       | <b>CsOAc</b> | <b>NaHCO<sub>3</sub></b>        | DCM               | <b>55</b> | <b>76</b> | <b>nd</b> |
| 19 <sup>f</sup> | CsOAc        | NaHCO <sub>3</sub>              | DCM               | 55        | 72        | nd        |
| 20 <sup>g</sup> | CsOAc        | NaHCO <sub>3</sub>              | DCM               | 55        | 65        | nd        |
| 21              | -            | NaHCO <sub>3</sub>              | DCM               | 55        | >5        | nd        |
| 22              | CsOAc        | K <sub>3</sub> PO <sub>4</sub>  | DCM               | 55        | 59        | nd        |
| 23              | CsOAc        | K <sub>2</sub> CO <sub>3</sub>  | DCM               | 55        | 44        | nd        |
| 24              | CsOAc        | Cs <sub>2</sub> CO <sub>3</sub> | DCM               | 55        | 51        | nd        |
| 25              | CsOAc        | NH <sub>4</sub> CO <sub>3</sub> | DCM               | 55        | 39        | nd        |
| 26 <sup>h</sup> | CsOAc        | NaHCO <sub>3</sub>              | DCM               | 55        | 74        | nd        |
| 27 <sup>i</sup> | CsOAc        | NaHCO <sub>3</sub>              | DCM               | 55        | 49        | nd        |
| 28              | CsOAc        | NaHCO <sub>3</sub>              | CHCl <sub>3</sub> | 55        | 60        | nd        |
| 29              | CsOAc        | NaHCO <sub>3</sub>              | DCE               | 55        | 53        | nd        |
| 30              | CsOAc        | NaHCO <sub>3</sub>              | DMSO              | 55        | nd        | nd        |
| 31              | CsOAc        | NaHCO <sub>3</sub>              | DMF               | 55        | nd        | nd        |
| 32              | CsOAc        | NaHCO <sub>3</sub>              | MeCN              | 55        | 45        | nd        |
| 33              | CsOAc        | NaHCO <sub>3</sub>              | Acetone           | 55        | 10        | nd        |
| 34              | CsOAc        | NaHCO <sub>3</sub>              | THF               | 55        | 15        | nd        |
| 35              | CsOAc        | NaHCO <sub>3</sub>              | 1,4-Dioxane       | 55        | 18        | nd        |
| 36              | CsOAc        | NaHCO <sub>3</sub>              | Toluene           | 55        | trace     | nd        |
| 37              | CsOAc        | NaHCO <sub>3</sub>              | MeOH              | 55        | nd        | nd        |
| 38              | CsOAc        | NaHCO <sub>3</sub>              | EtOH              | 55        | nd        | nd        |
| 39              | CsOAc        | NaHCO <sub>3</sub>              | <i>i</i> PrOH     | 55        | nd        | nd        |
| 40              | CsOAc        | NaHCO <sub>3</sub>              | TFE               | 55        | nd        | 22        |
| 41              | CsOAc        | NaHCO <sub>3</sub>              | HFIP              | 55        | nd        | 35        |
| 42              | CsOAc        | NaHCO <sub>3</sub>              | HFIP              | 70        | nd        | 44        |

|                       |       |                    |             |           |           |           |
|-----------------------|-------|--------------------|-------------|-----------|-----------|-----------|
| 43                    | CsOAc | NaHCO <sub>3</sub> | HFIP        | 85        | nd        | 39        |
| 44                    | CsOAc | -                  | HFIP        | 70        | nd        | 52        |
| <b>45<sup>j</sup></b> | CsOAc | -                  | <b>HFIP</b> | <b>70</b> | <b>nd</b> | <b>68</b> |
| 46 <sup>k</sup>       | CsOAc | -                  | HFIP        | 70        | nd        | 52        |
| 47 <sup>l</sup>       | CsOAc | -                  | HFIP        | 70        | nd        | 65        |
| 48 <sup>m</sup>       | CsOAc | -                  | HFIP        | 70        | nd        | 53        |
| 49                    | CsOAc | NaHCO <sub>3</sub> | DCM         | 70        | 58        | nd        |
| 50                    | CsOAc | -                  | HFIP        | 40        | nd        | 25        |

<sup>a</sup>Reaction Conditions: **1a** (0.11 mmol, 1.1 equiv), **2a** (0.10 mmol, 1.0 equiv), DCM (1 mL).

<sup>b</sup>Isolated yield. <sup>c</sup>CsOAc (2 equiv). <sup>d</sup>CsOAc (0.5 equiv). <sup>e</sup>1-Adamantane carboxylic acid.

<sup>f</sup>NaHCO<sub>3</sub> (2 equiv). <sup>g</sup>NaHCO<sub>3</sub> (0.5 equiv). <sup>h</sup>**1a** (1.5 equiv). <sup>i</sup>**1a** (0.5 equiv). <sup>j</sup>HFIP (2.0 mL).

<sup>k</sup>HFIP (0.5 mL). <sup>l</sup>**1a** (1.5 equiv). <sup>m</sup>**1a** (0.5 equiv). nd = not detected (reaction continued for 24 h).

**(b) Screening of Catalyst for 3a**

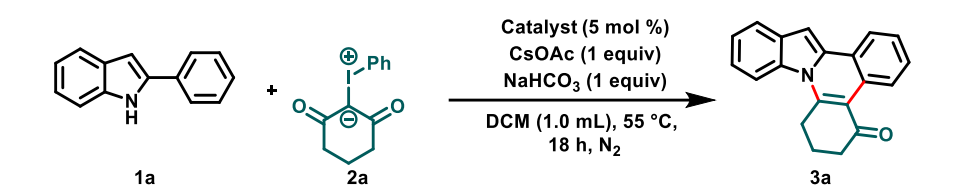

| Entry          | Catalyst                                                                  | <b>3a</b> (%) <sup>b</sup> |
|----------------|---------------------------------------------------------------------------|----------------------------|
| <b>1</b>       | <b>[Cp*RhCl<sub>2</sub>]<sub>2</sub></b>                                  | <b>76</b>                  |
| 2              | -                                                                         | nd                         |
| 3 <sup>c</sup> | [Cp*RhCl <sub>2</sub> ] <sub>2</sub>                                      | 71                         |
| 4              | [Cp*Rh(CH <sub>3</sub> CN) <sub>3</sub> ](SbF <sub>6</sub> ) <sub>2</sub> | 62                         |
| 5              | [Cp*IrCl <sub>2</sub> ] <sub>2</sub>                                      | 47                         |
| 6              | [CoCp*(CO)I <sub>2</sub> ]                                                | nd                         |
| 7              | [Ru( <i>p</i> -cymene)Cl <sub>2</sub> ] <sub>2</sub>                      | nd                         |
| 8              | [Rh <sub>2</sub> (OAc) <sub>4</sub> ]                                     | nd                         |
| 9              | [Rh <sub>2</sub> ( <i>S</i> -DOSP) <sub>4</sub> ]                         | nd                         |

<sup>a</sup>Reaction Conditions: **1a** (0.11 mmol, 1.1 equiv.), **2a** (0.10 mmol, 1.0 equiv.), DCM (1.0 mL).

<sup>b</sup>Isolated yield. <sup>c</sup>[Cp\*RhCl<sub>2</sub>]<sub>2</sub> (3 mol %). <sup>d</sup>nd = not detected (reaction continued for 24 h).

(c) Screening of Catalyst for **4a**

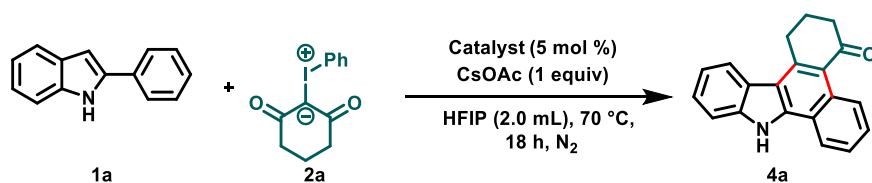

| Entry          | Catalyst                                                                  | <b>3a</b> (%) <sup>b</sup> |
|----------------|---------------------------------------------------------------------------|----------------------------|
| <b>1</b>       | [Cp*RhCl <sub>2</sub> ] <sub>2</sub>                                      | <b>68</b>                  |
| 2              | -                                                                         | nd                         |
| 3 <sup>c</sup> | [Cp*RhCl <sub>2</sub> ] <sub>2</sub>                                      | 59                         |
| 4              | [Cp*Rh(CH <sub>3</sub> CN) <sub>3</sub> ](SbF <sub>6</sub> ) <sub>2</sub> | 51                         |
| 5              | [Cp*IrCl <sub>2</sub> ] <sub>2</sub>                                      | nd                         |
| 6              | [CoCp*(CO)I <sub>2</sub> ]                                                | nd                         |
| 7              | [Ru( <i>p</i> -cymene)Cl <sub>2</sub> ] <sub>2</sub>                      | nd                         |
| 8              | [Rh <sub>2</sub> (OAc) <sub>4</sub> ]                                     | nd                         |
| 9              | [Rh <sub>2</sub> ( <i>S</i> -DOSP) <sub>4</sub> ]                         | nd                         |

<sup>a</sup>Reaction Conditions: **1a** (0.11 mmol, 1.1 equiv.), **2a** (0.10 mmol, 1.0 equiv.), HFIP (2.0 mL).

<sup>b</sup>Isolated yield. <sup>c</sup>[Cp\*RhCl<sub>2</sub>]<sub>2</sub> (3 mol %). <sup>d</sup>nd = not detected (reaction continued for 24 h).

## 4. Mechanistic studies:

### 4.1 Mechanistic studies for **3a** product:

(a) H/D exchange reaction for **3a** product

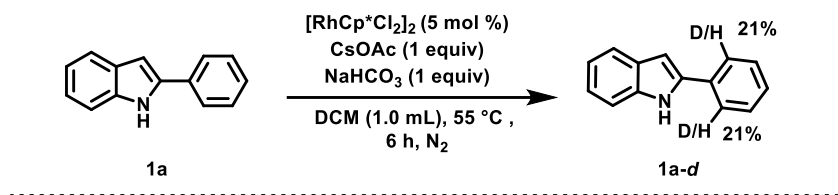

To a mixture of 2-phenyl indole **1a** (0.11 mmol, 1.1 equiv),  $[\text{RhCp}^*\text{Cl}_2]_2$  (5 mol %), CsOAc (1.0 equiv) and  $\text{NaHCO}_3$  (1.0 equiv) in an oven dried 10 mL reaction tube was added dry DCM (1.0 mL) and  $\text{CD}_3\text{OD}$  (1.29 mmol, 10 equiv) under  $\text{N}_2$  atmosphere. Then the tube was capped with septa, and the resulting mixture was stirred at 55 °C on oil bath for 6 h. The residue was filtered through celite, and solvent was evaporated under reduced pressure to afford the crude **1a-d** and was used directly for the  $^1\text{H}$  NMR analysis.

Found *H/D* exchange 21% at *ortho* position 2-phenyl indole.

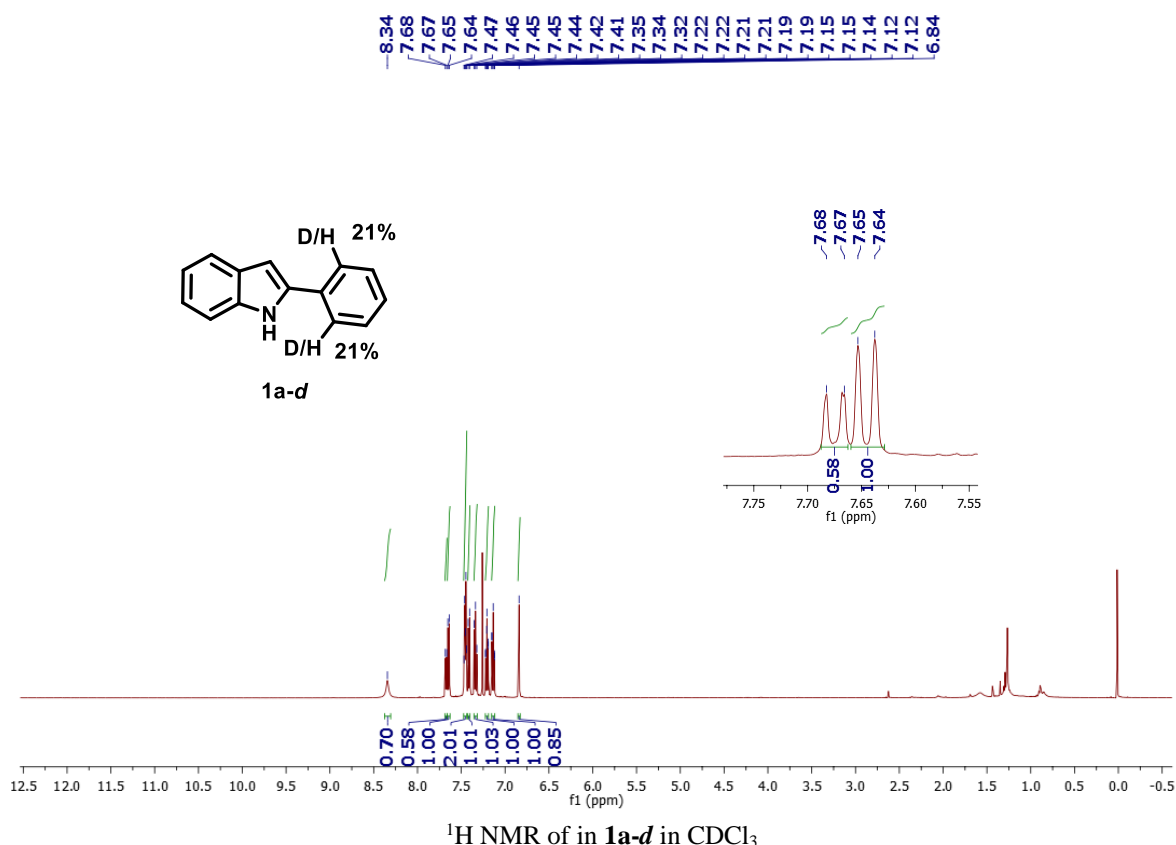



(b) Parallel reactions for KIE value measurement for **3a** product

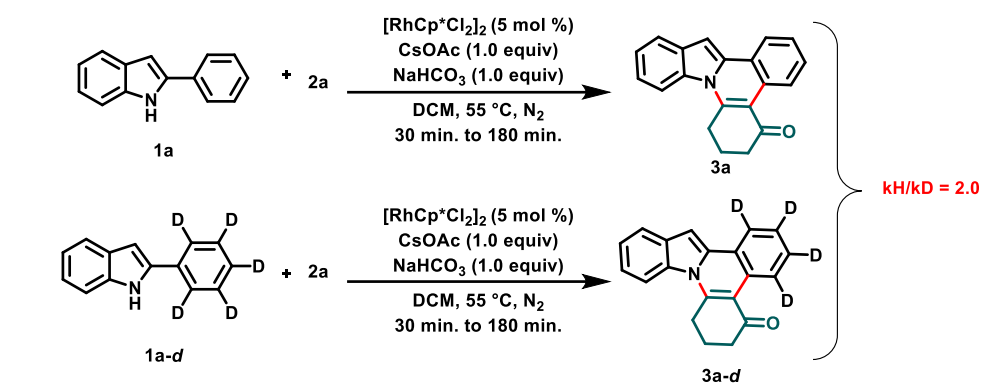

To an oven dried screw cap reaction tube equipped with a magnetic stir bar, 0.11 mmol of 2-Phenylindole H5 was subjected to standard reaction conditions. After an equal interval of 30 minutes, reaction mixture was concentrated and directly taken for NMR analysis up to 180 minutes. Identical set of experiments were performed using 2-Phenylindole-*d*<sub>5</sub> and NMR analysis was carried out.

#### Studies for 2-Phenylindole H5

| S.no | Time (minutes) | Rate conversion | Mmol of Product |
|------|----------------|-----------------|-----------------|
| 1    | 30             | 0.18            | 0.018           |
| 2    | 60             | 0.22            | 0.022           |
| 3    | 90             | 0.29            | 0.029           |
| 4    | 120            | 0.32            | 0.032           |
| 5    | 150            | 0.38            | 0.038           |
| 6    | 180            | 0.42            | 0.042           |

#### Studies for 2-Phenylindole D5

| S.no | Time (minutes) | Rate conversion | Mmol of Product |
|------|----------------|-----------------|-----------------|
| 1    | 30             | 0.12            | 0.012           |
| 2    | 60             | 0.14            | 0.014           |
| 3    | 90             | 0.18            | 0.018           |
| 4    | 120            | 0.21            | 0.021           |
| 5    | 150            | 0.23            | 0.023           |
| 6    | 180            | 0.30            | 0.030           |

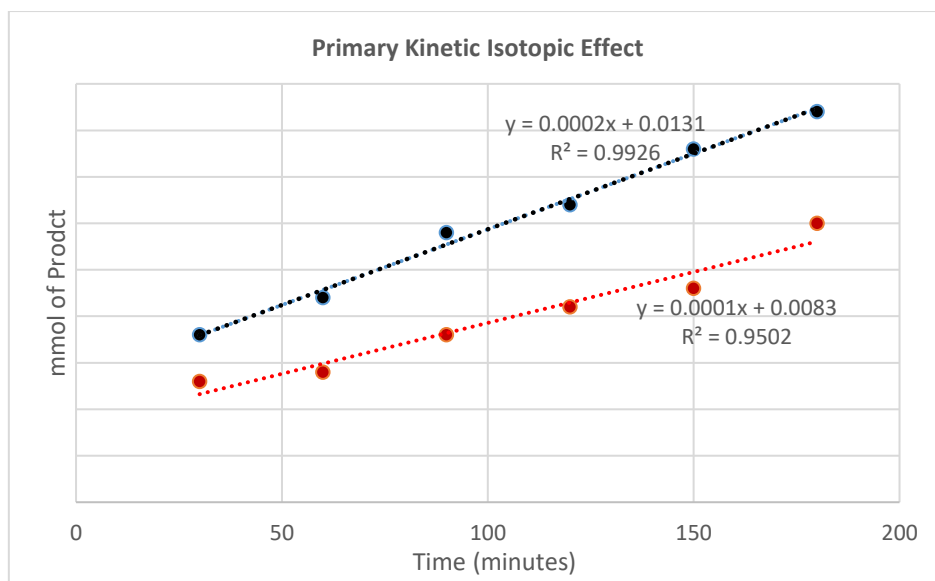

**7,8-dihydroindolo[1,2-*f*]phenanthridin-5(6*H*)-one-1,2,3,4-*d*<sub>4</sub> (3a-*d*<sub>4</sub>):**

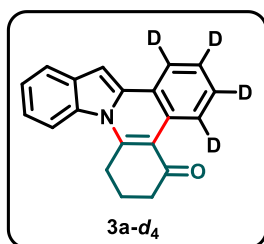

Obtained as pale yellow solid; (19 mg, Yield = 65%), m.p. 158-159 °C,  $R_f = 0.4$  (ethyl acetate/hexane: 23:77).

$^1\text{H NMR}$  (500 MHz,  $\text{CDCl}_3$ )  $\delta$  8.10 (d,  $J = 8.4$  Hz, 1H), 7.81 (d,  $J = 7.8$  Hz, 1H), 7.41 (t,  $J = 7.4$  Hz, 1H), 7.32 (t,  $J = 7.8$  Hz, 1H), 7.25 (s, 1H), 3.66 (t,  $J = 6.1$  Hz, 2H), 2.76 (t,  $J = 6.5$  Hz, 2H), 2.30 (p,  $J = 12.6$ , 6.5 Hz, 2H).

$^{13}\text{C NMR}$  (126 MHz,  $\text{CDCl}_3$ )  $\delta$  197.7, 151.0, 136.4, 133.7, 131.6, 124.7, 123.5, 121.8, 121.2, 116.3, 113.7, 111.7, 97.1, 39.0, 30.8, 21.5.

**IR** (Neat,  $\text{v}/\text{cm}^{-1}$ ) 3266, 3043, 2958, 2870, 1636, 1564, 1418, 1329, 1244, 1135, 1034.

**HRMS** (ESI)  $m/z$ :  $[\text{M}+\text{H}]^+$  calcd for  $\text{C}_{20}\text{H}_{12}\text{D}_4\text{NO}$  290.1478; Found 290.1477.

(c) Competitive reactions for KIE value measurement for **3a** product

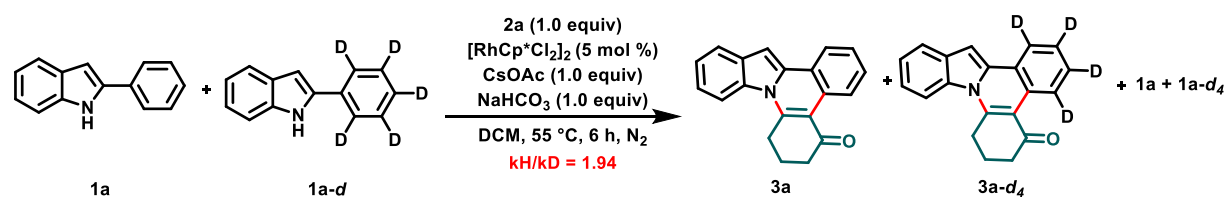

To a mixture of **1a** (0.11 mmol, 1.1 equiv), **1a-d** (0.11 mmol, 1.1 equiv), **2a** (0.10 mmol, 1.0 equiv), [RhCp\*Cl<sub>2</sub>]<sub>2</sub> (5 mol %), CsOAc (1.0 equiv) and NaHCO<sub>3</sub> (1.0 equiv) in an oven dried 10 mL reaction tube was added dry DCM (1.0 mL) under N<sub>2</sub> atmosphere. Then the tube was capped with septa, and the resulting mixture was stirred at 55 °C on oil bath for 6 h. The reaction mixture was filtered by silica pad, solvent was evaporated under reduced pressure to give mixture of the product mixture of products **3a** and **3a-d<sub>4</sub>** and **1a** and **1a-d<sub>5</sub>**. The KIE was determined by the <sup>1</sup>H NMR integration.

A kinetic isotopic effect of these two reactions was determined to be  $kH/kD = 1.94$  (0.66/0.34)

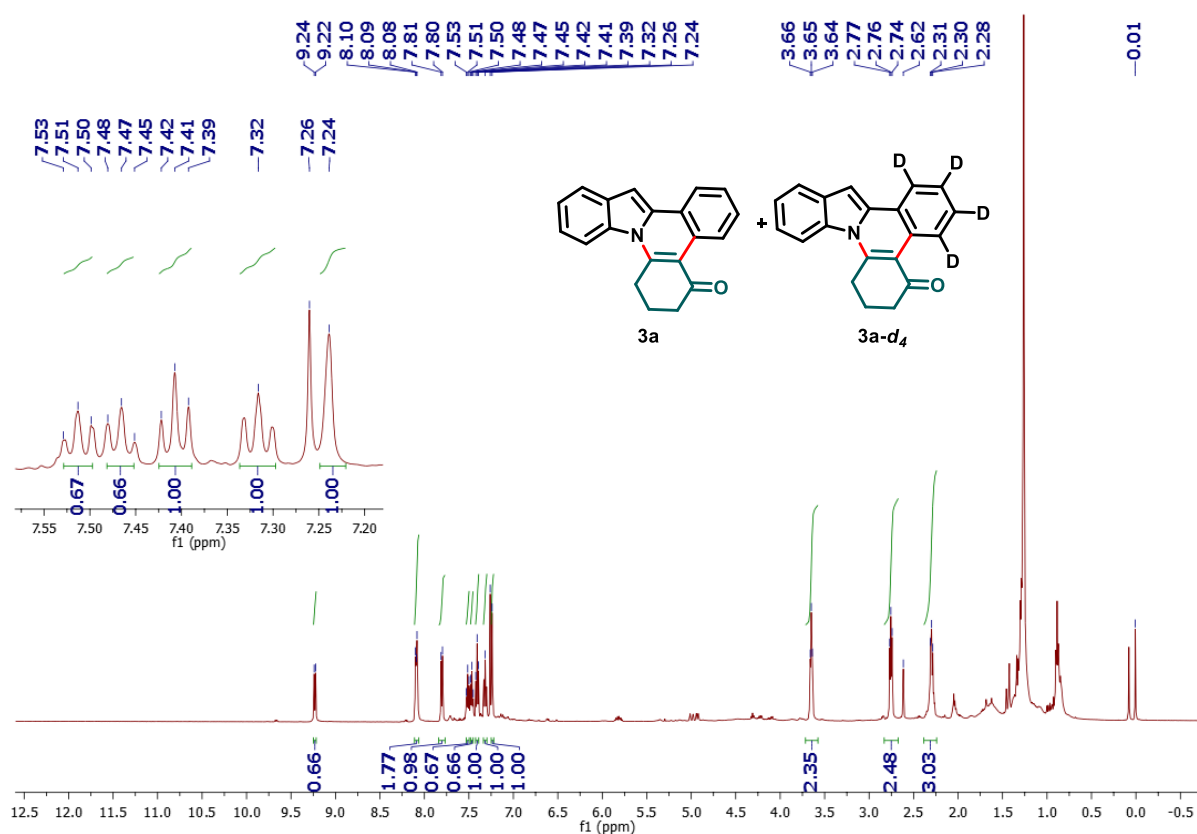

(d) Competitive reaction between 2-phenyl indoles:

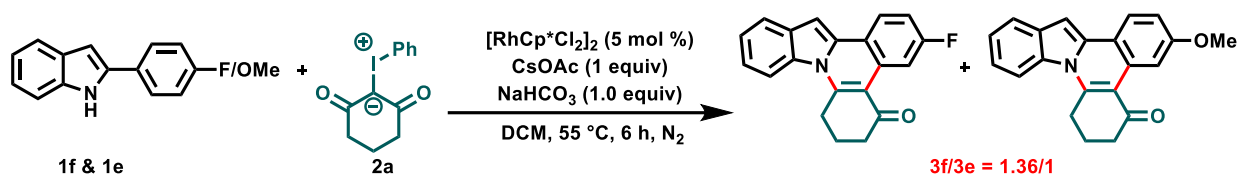

To a mixture of **1f** (0.11 mmol, 1.1 equiv), **1e** (0.11 mmol, 1.1 equiv), **2a** (0.10 mmol, 1.0 equiv),  $[\text{RhCp}^*\text{Cl}_2]_2$  (5 mol %) and CsOAc (1.0 equiv) in an oven dried 10 mL reaction tube was added DCM (1.0 mL) under  $\text{N}_2$  atmosphere. Then the tube was capped with septa, and the resulting mixture was stirred at 55 °C on oil bath for 6 h. The reaction mixture was filtered by celite pad, solvent was evaporated under reduced pressure to give mixture of the product **3f** and **3e** which was submitted for NMR. The ratio of **3f/3e** of purified product was determined to be **1.36/1.0** by  $^1\text{H}$  NMR integration (see below). Resulting, the reaction **3f** is proceeding **1.36** times faster than **3e**.

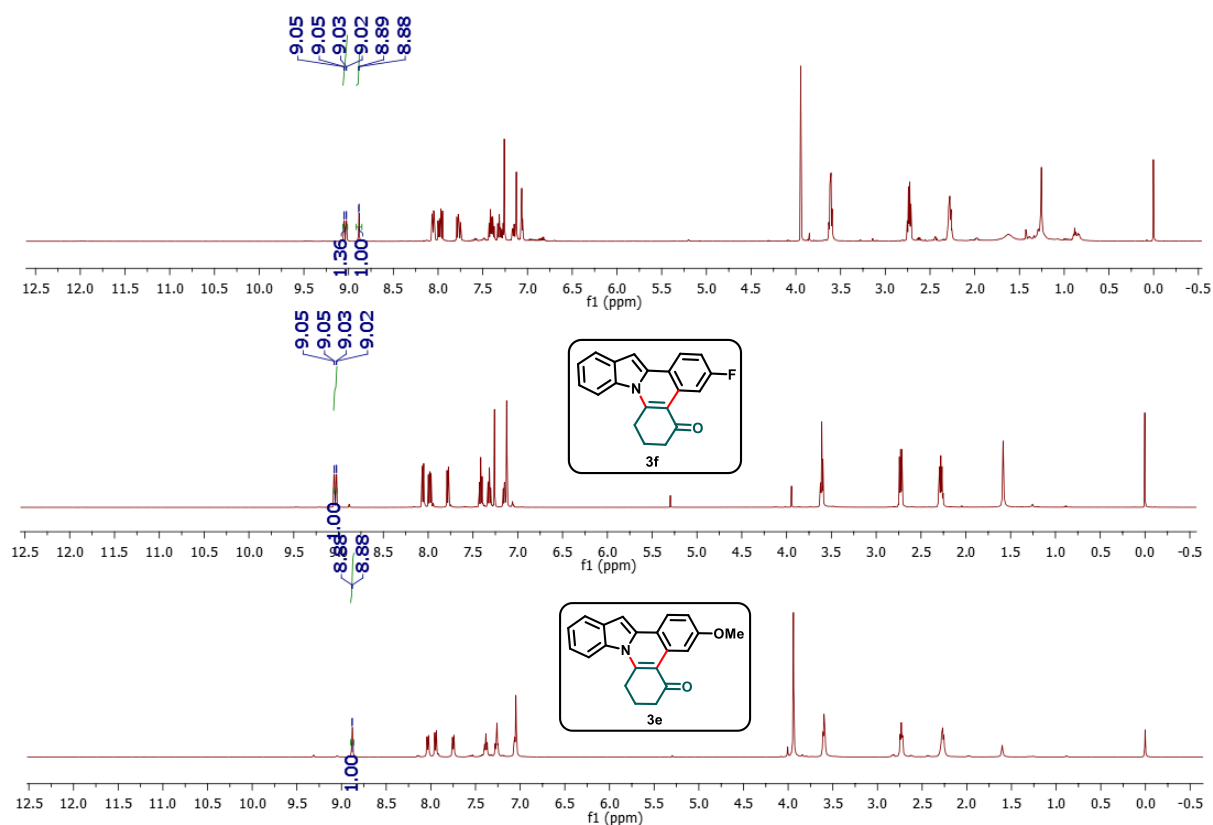

## 4.2 Mechanistic studies for **4a** product:

(a) H/D exchange reaction for **4a** product

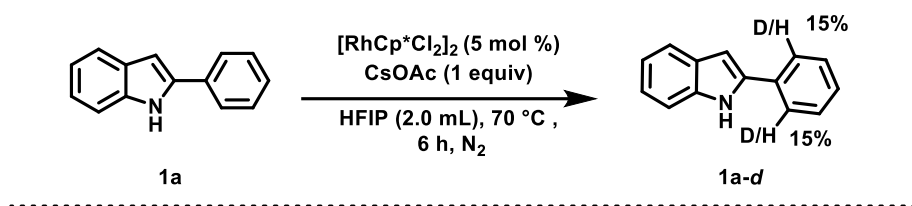

To a mixture of 2-phenyl indole **1a** (0.11 mmol, 1.1 equiv),  $[\text{RhCp}^*\text{Cl}_2]_2$  (5 mol %) and CsOAc (1.0 equiv) in an oven dried 10 mL reaction tube was added HFIP (2.0 mL) and  $\text{CD}_3\text{OD}$  (1.29 mmol, 10 equiv) under  $\text{N}_2$  atmosphere. Then the tube was capped with septa, and the resulting mixture was stirred at 70 °C on oil bath for 6 h. The residue was filtered through celite and solvent as evaporated under reduced pressure to afford the crude **1a-d** and was directly used for proton  $^1\text{H}$  analysis.

Found *H/D* exchange 15% at *ortho* position 2-phenyl indole.

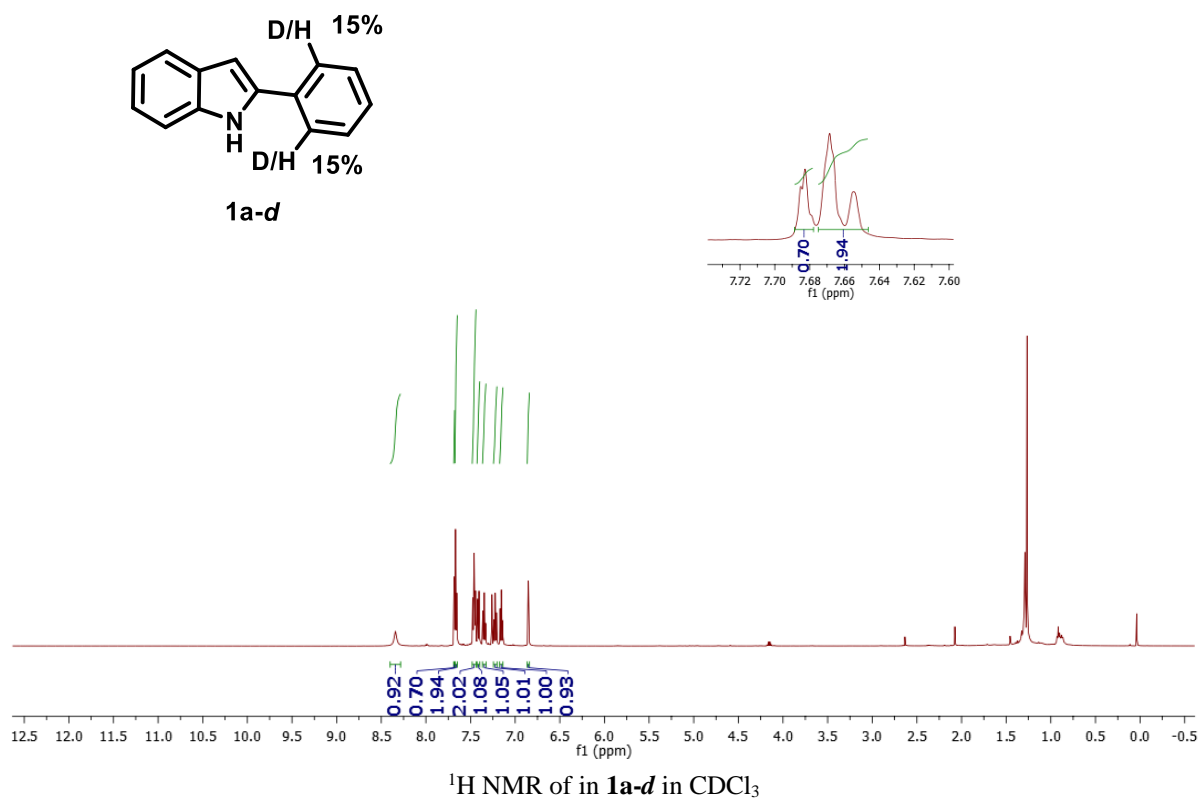

(b) Parallel reactions for KIE value measurement for **4a** product

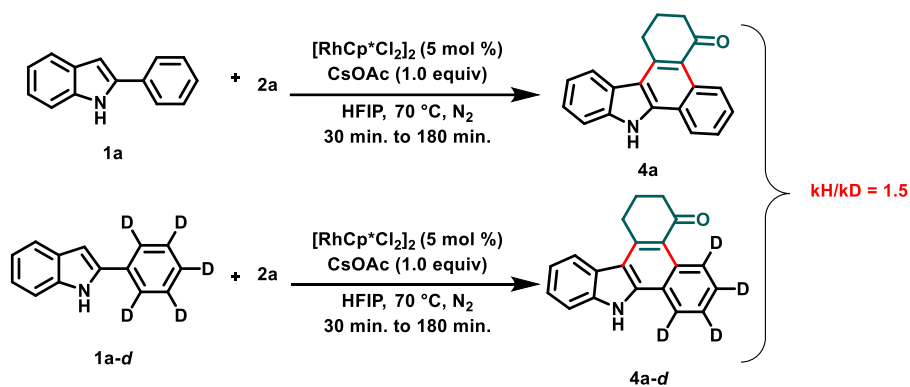

To an oven dried screw cap reaction tube equipped with a magnetic stir bar, 0.11 mmol of 2-Phenylindole H5 was subjected to standard reaction conditions. After an equal interval of 30 minutes, reaction mixture was concentrated and directly taken for NMR analysis up to 180 minutes. Identical set of experiments were performed using D5-2-Phenylindole and NMR analysis was carried out.

#### Studies for 2-Phenylindole H5

| S.no | Time (minutes) | Rate conversion | Mmol of Product |
|------|----------------|-----------------|-----------------|
| 1    | 30             | 0.17            | 0.017           |
| 2    | 60             | 0.21            | 0.021           |
| 3    | 90             | 0.29            | 0.029           |
| 4    | 120            | 0.33            | 0.033           |
| 5    | 150            | 0.44            | 0.044           |
| 6    | 180            | 0.55            | 0.05            |

#### Studies for 2-Phenylindole D5

| S.no | Time (minutes) | Rate conversion | Mmol of Product |
|------|----------------|-----------------|-----------------|
| 1    | 30             | 0.08            | 0.008           |
| 2    | 60             | 0.11            | 0.011           |
| 3    | 90             | 0.16            | 0.016           |
| 4    | 120            | 0.20            | 0.020           |
| 5    | 150            | 0.23            | 0.023           |
| 6    | 180            | 0.32            | 0.032           |

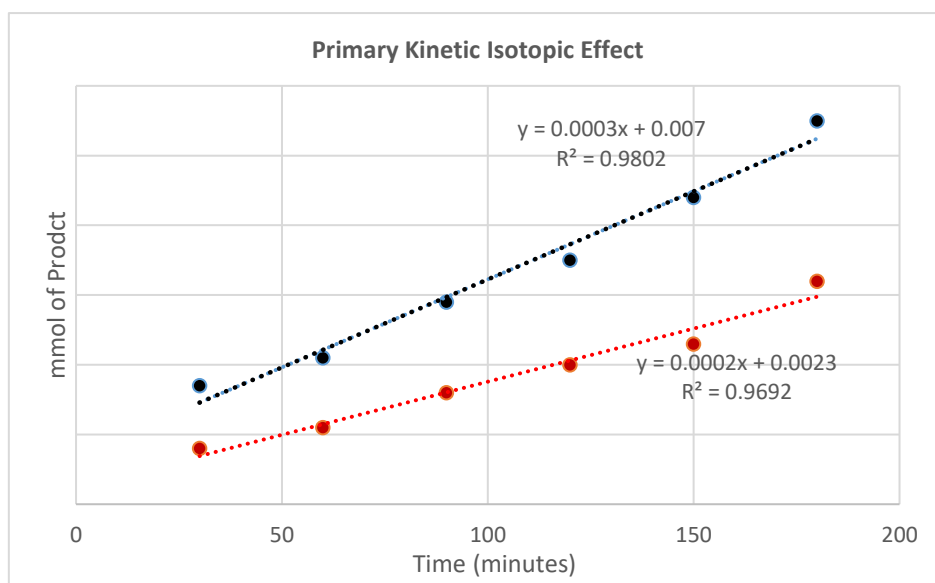

**1,2,3,9-tetrahydro-4*H*-dibenzo[*a,c*]carbazol-4-one-5,6,7,8-*d*<sub>4</sub> (4a-*d*<sub>4</sub>):**

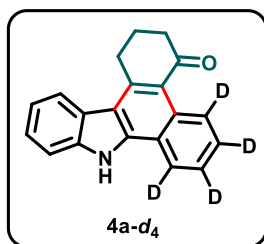

Obtained as pale yellow solid; (17 mg, Yield = 59%), m.p. 158-159 °C,  $R_f = 0.4$  (ethyl acetate/hexane: 30:70).

$^1\text{H NMR}$  (500 MHz,  $\text{CDCl}_3$ )  $\delta$  9.09 (s, 1H), 8.26 (d,  $J = 7.9$  Hz, 1H), 7.64 (d,  $J = 8.1$  Hz, 1H), 7.50 (t,  $J = 7.6$  Hz, 1H), 7.38 (t,  $J = 7.6$  Hz, 1H), 3.73 (t,  $J = 6.2$  Hz, 2H), 2.88 (t,  $J = 6.4$  Hz, 2H), 2.37 (t,  $J = 6.9$ , 12.9 Hz, 2H).

$^{13}\text{C NMR}$  (126 MHz,  $\text{CDCl}_3$ )  $\delta$  200.0, 145.4, 139.0, 138.3, 128.5, 125.3, 124.9, 122.7, 121.2, 120.2, 116.1, 111.6, 40.9, 29.6, 22.7.

**IR** (Neat,  $\text{v}/\text{cm}^{-1}$ ) 3262, 3205, 3043, 2938, 2870, 1628, 1547, 1454, 1248, 1187, 1123.

**HRMS (ESI)  $m/z$ :**  $[\text{M}+\text{H}]^+$  calcd for  $\text{C}_{20}\text{H}_{12}\text{D}_4\text{NO}$  290.1478; Found 290.1474.

(c) Competitive reactions for KIE value measurement for **4a** product

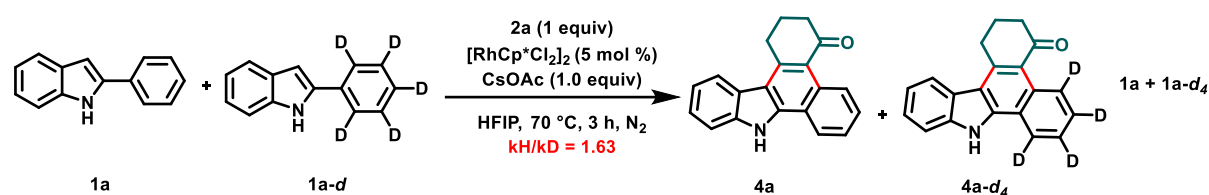

To a mixture of **1a** (0.11 mmol, 1.1 equiv), **1a-d** (0.11 mmol, 1.1 equiv), **2a** (0.10 mmol, 1.0 equiv),  $[\text{RhCp}^*\text{Cl}_2]_2$  (5 mol %) and CsOAc (1.0 equiv) in an oven dried 10 mL reaction tube was added HFIP (2.0 mL) under  $\text{N}_2$  atmosphere. Then the tube was capped with septa, and the resulting mixture was stirred at 70 °C on oil bath for 3 h. The reaction mixture was filtered by celite pad, solvent was evaporated under reduced pressure to give mixture of the product mixture of products **4a** and **4a-d<sub>4</sub>** and **1a** and **1a-d<sub>4</sub>**. The KIE was determined by the  $^1\text{H}$  NMR integration.

A kinetic isotopic effect of these two reactions was determined to be  $k_{\text{H}}/k_{\text{D}} = 1.63$  (0.62/0.38).

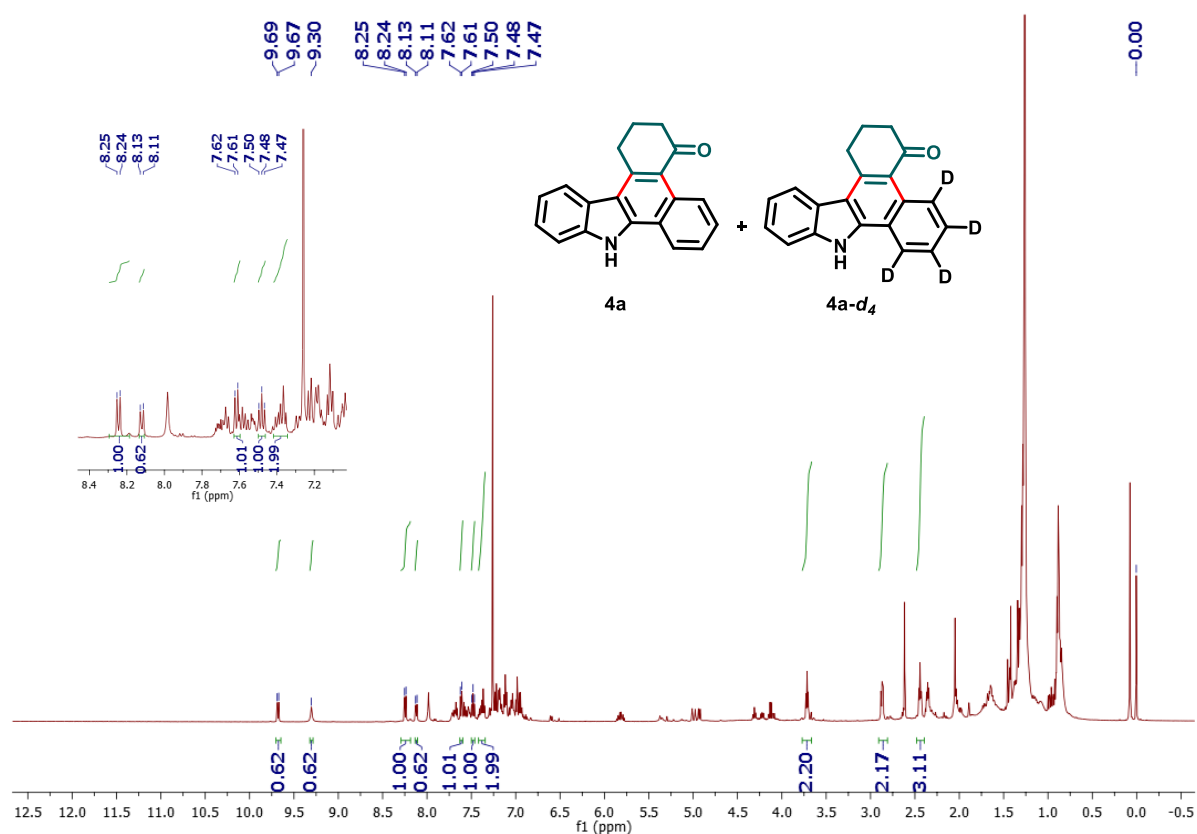

$^1\text{H}$  NMR spectrum of mixture **4a** and **4a-d<sub>4</sub>** ( $\text{CDCl}_3$ , 500 MHz)



(d) Competitive reaction between 2-phenyl indoles:

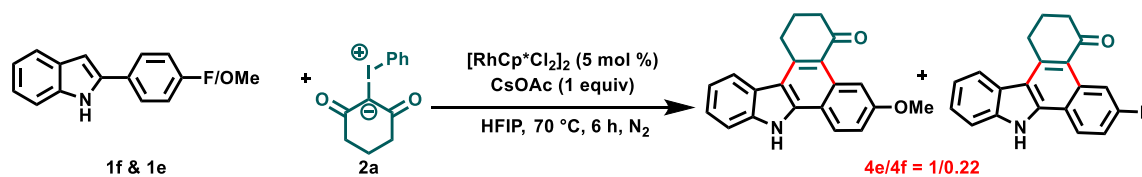

To a mixture of **1f** (0.11 mmol, 1.1 equiv), **1e** (0.11 mmol, 1.1 equiv), **2a** (0.10 mmol, 1.0 equiv),  $[\text{RhCp}^*\text{Cl}_2]_2$  (5 mol %) and CsOAc (1.0 equiv) in an oven dried 10 mL reaction tube was added HFIP (2.0 mL) under  $\text{N}_2$  atmosphere. Then the tube was capped with septa, and the resulting mixture was stirred at 70 °C on oil bath for 6 h. The reaction mixture was filtered by celite pad, solvent was evaporated under reduced pressure to give mixture of the product **4e** and **4f** which was submitted for NMR. The ratio of **4e/4f** of purified product was determined to be **1.0/0.22** by  $^1\text{H}$  NMR integration (see below). Resulting, the reaction **4e** is proceeding **4.5** times faster than **4f**.

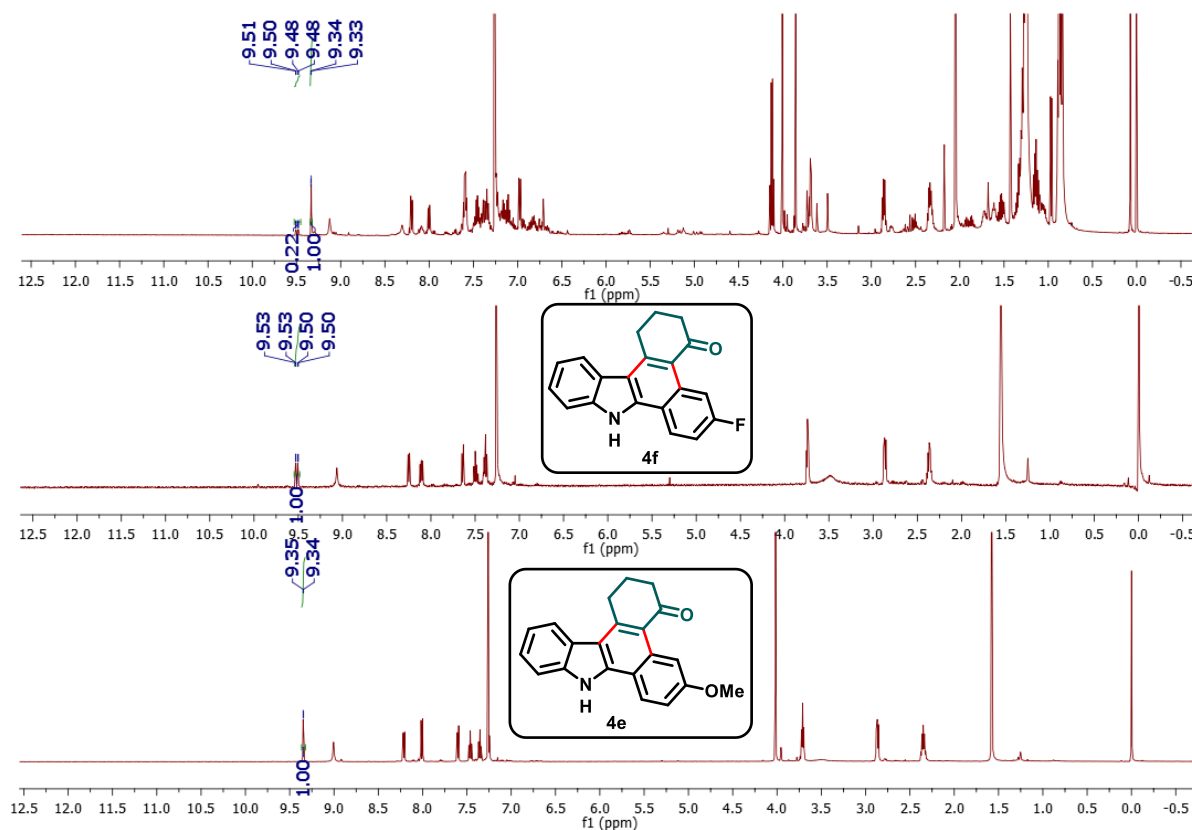

$^1\text{H}$  NMR overlay of competitive reaction,  $^1\text{H}$  NMR of **4f** and **4e**

### 4.3 Studies on Directing groups:

a) Reaction of **1z** with iodonium ylide for **3a** product:

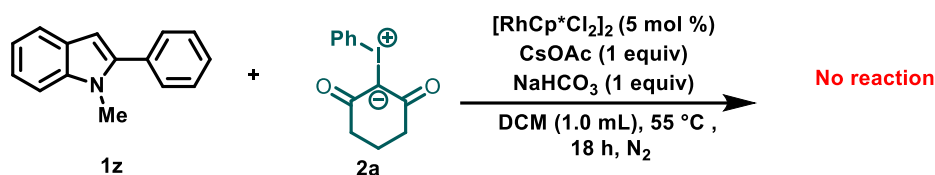

To an oven dried 10 mL reaction tube with a magnetic stir bar was charged with **1z** (0.11 mmol, 1.1 equiv), **2a** (0.10 mmol, 1.0 equiv),  $[\text{RhCp}^*\text{Cl}_2]_2$  (5.0 mol %), CsOAc (0.10 mmol, 1.0 equiv),  $\text{NaHCO}_3$  (0.10 mmol, 1.0 equiv) and dry DCM (1.0 mL) was added under  $\text{N}_2$  atmosphere. Then, the tube was capped with septa, and the resulting mixture was stirred at 55 °C for the period of 18 h. Further, the reaction was monitored by TLC to confirm the product formations and it was observed that starting material **1z** was intact and the desired product was not formed.

b) Reaction of **1z** with iodonium ylide for **4a** product:

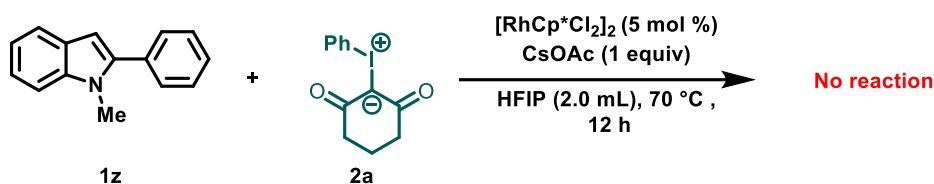

To an oven dried 10 mL reaction tube with a magnetic stir bar was charged with **1z** (0.11 mmol, 1.1 equiv), **2a** (0.10 mmol, 1.0 equiv),  $[\text{RhCp}^*\text{Cl}_2]_2$  (5.0 mol %), CsOAc (0.10 mmol, 1.0 equiv), and HFIP (2.0 mL) was added under  $\text{N}_2$  atmosphere. Then, the tube was capped with septa, and the resulting mixture was stirred at 70 °C for the period of 12 h. Further, the reaction was monitored by TLC to confirm the product formations and it was observed that starting material **1z** was intact and the desired product was not formed.

c) Reaction of **1p** with iodonium ylide for **4a** product:

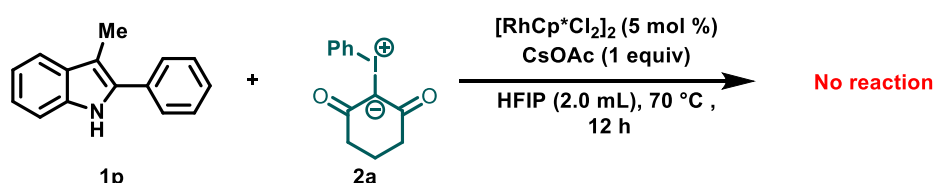

To an oven dried 10 mL reaction tube with a magnetic stir bar was charged with **1k** (0.11 mmol, 1.1 equiv), **2a** (0.10 mmol, 1.0 equiv), [RhCp\*Cl<sub>2</sub>]<sub>2</sub> (5.0 mol %), CsOAc (0.10 mmol, 1.0 equiv), and HFIP (2.0 mL) was added under N<sub>2</sub> atmosphere. Then, the tube was capped with septa, and the resulting mixture was stirred at 70 °C for the period of 12 h. Further, the reaction was monitored by TLC to confirm the product formations and it was observed that starting material **1p** was intact and the desired product was not formed.

d) Preparation of 2-phenyl-1*d*-indole:

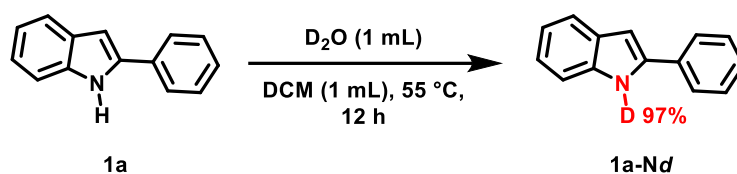

To a solution of **1a** (0.051 mmol, 1.0 equiv), in 1 mL DCM was added deuterium oxide (D<sub>2</sub>O) 1mL. Then the contents were stirred at 55 °C on an oil bath for 12 h. Then solvent was evaporated under reduced pressure and the residue was subjected for <sup>1</sup>H NMR.

*Found H/D exchange 97% at NH of 2-phenyl indole.*

### 2-phenyl-1*d*-indole

<sup>1</sup>H NMR (500 MHz, CDCl<sub>3</sub>) δ 7.71 – 7.61 (m, 3H), 7.49 – 7.38 (m, 3H), 7.36 – 7.30 (m, 1H), 7.20 (ddd, *J* = 8.1, 7.1, 1.2 Hz, 1H), 7.16 – 7.11 (m, 1H), 6.84 (d, *J* = 0.8 Hz, 1H).

<sup>13</sup>C NMR (126 MHz, CDCl<sub>3</sub>) δ 137.9, 136.8, 132.5, 129.3, 129.2, 127.8, 125.3, 122.5, 120.8, 120.4, 110.0, 100.0.

HRMS (ESI) *m/z*: [M+H]<sup>+</sup> calcd for C<sub>14</sub>H<sub>11</sub>DN 195.1028; Found 195.1023.

## 2-Phenyl-1*d*-indole:

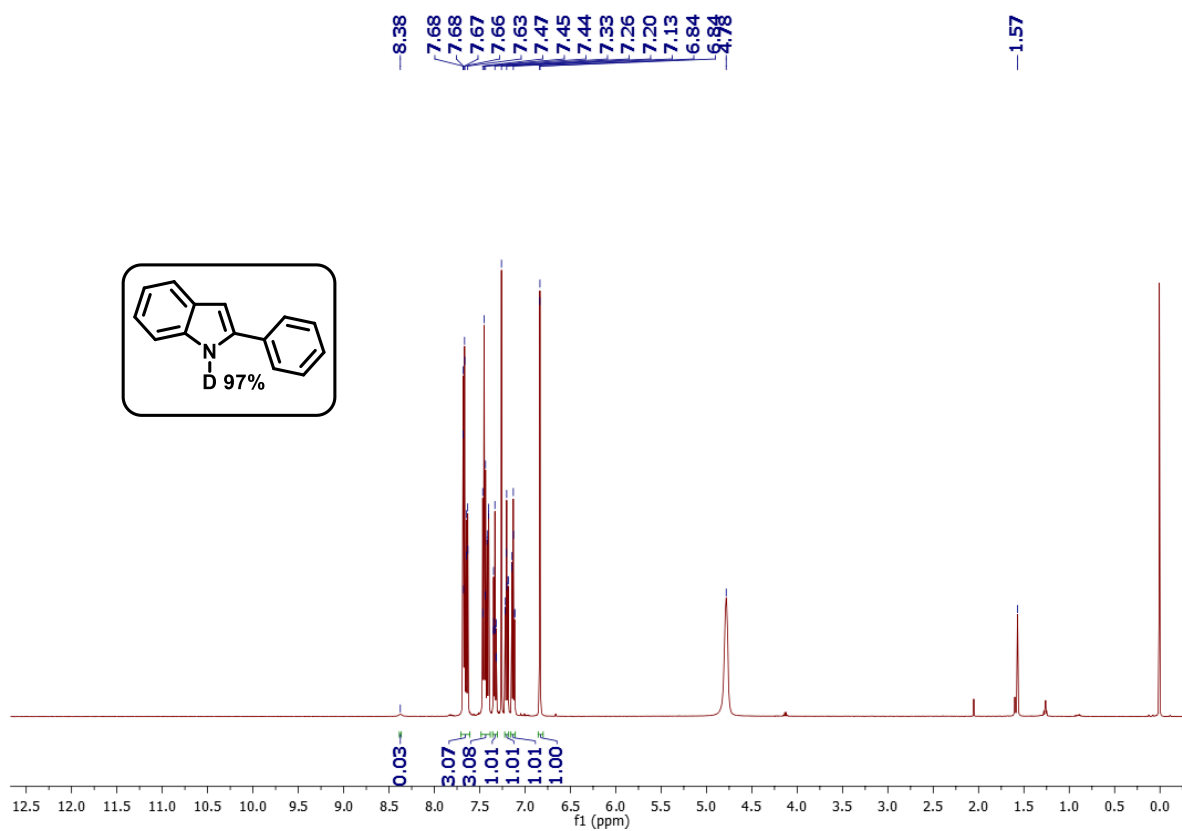

<sup>1</sup>H NMR of compound 2-phenyl-1*d*-indole (500 MHz, CDCl<sub>3</sub>)

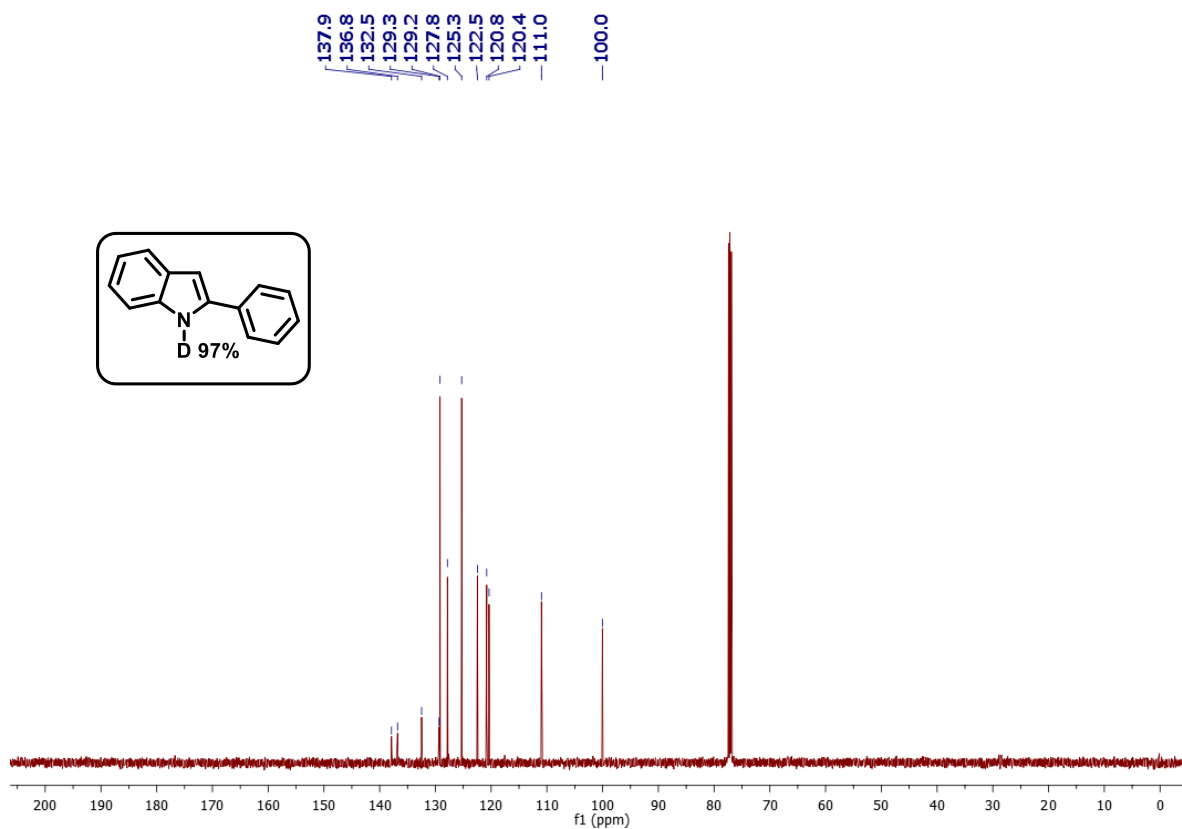

<sup>13</sup>C NMR of compound 2-phenyl-1*d*-indole (126 MHz, CDCl<sub>3</sub>)

**7,8-dihydroindolo[1,2-f]phenanthridin-5(6H)-one:**

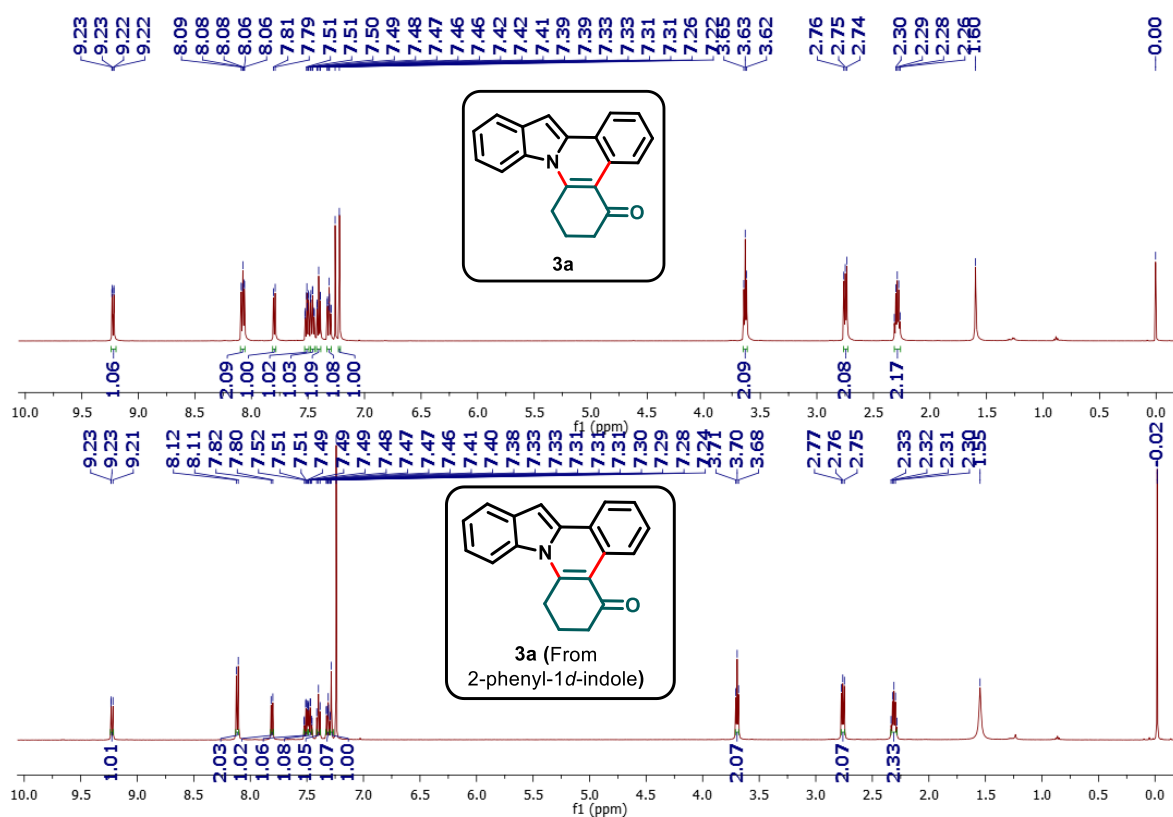

<sup>1</sup>H NMR of compound **3a** and **3a** from 2-phenyl-1*d*-indole (500 MHz, CDCl<sub>3</sub>)

**1,2,3,9-tetrahydro-4H-dibenzo[*a,c*]carbazol-4-one (4a):**

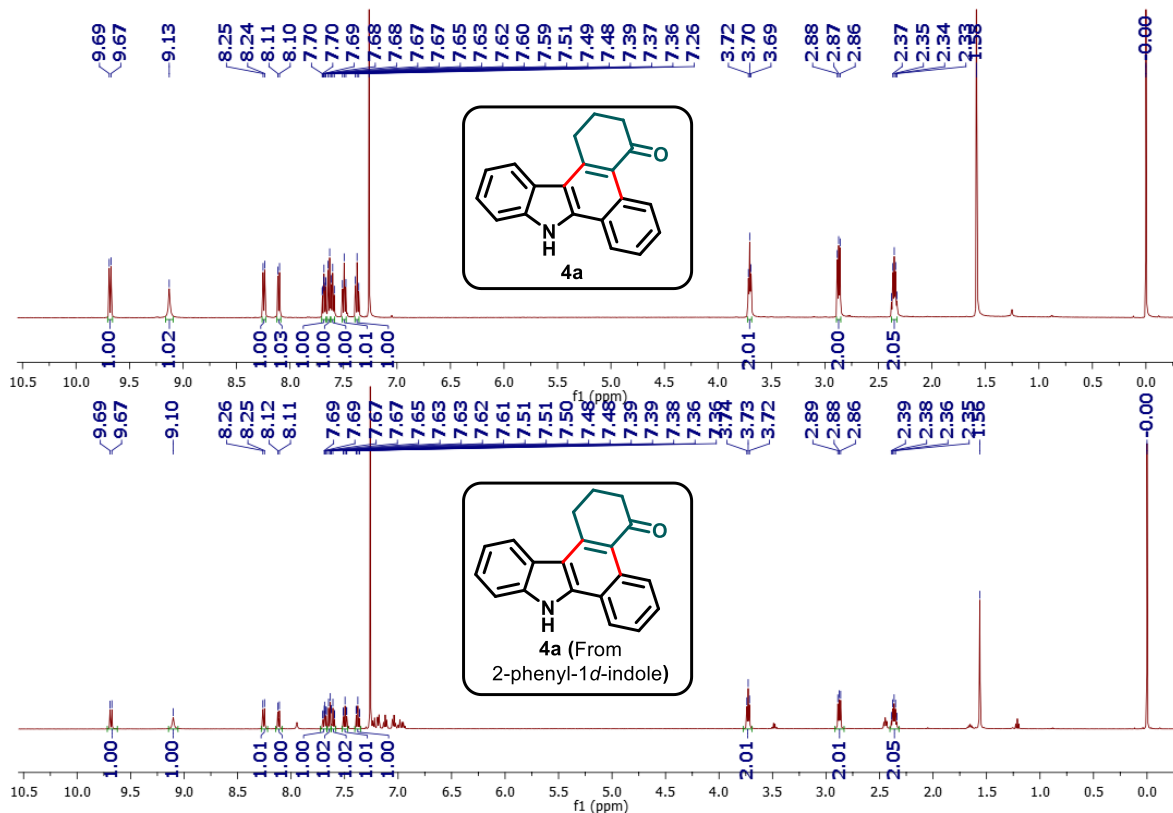

<sup>1</sup>H NMR of compound **4a** and **4a** from 2-phenyl-1*d*-indole (500 MHz, CDCl<sub>3</sub>)

## 5. General procedure for product 3:

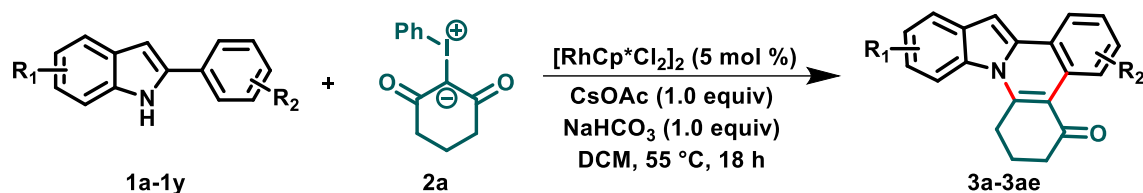

**General procedure A:** In a 10 mL oven dried reaction tube with a magnetic stir bar was charged with 2-phenylindole derivatives **1** (0.11 mmol, 1.1 equiv), Iodonium ylide **2a** (0.10 mmol, 1.0 equiv),  $[\text{RhCp}^*\text{Cl}_2]_2$  (5 mol %), CsOAc (1.0 equiv) and NaHCO<sub>3</sub> (1.0 equiv) in 1 mL of dry DCM under N<sub>2</sub> atmosphere. Then the tube was capped with septa and the resulting mixture was stirred at 55 °C on oil bath for 18 h. The reaction completion was monitored by TLC. Upon completion of reaction, the solvent was evaporated under reduced pressure and the crude product was directly purified by a silica gel column chromatography by using ethyl acetate/hexane as the eluent to afford the corresponding product **3**.

### 7,8-dihydroindolo[1,2-*f*]phenanthridin-5(6*H*)-one (**3a**):

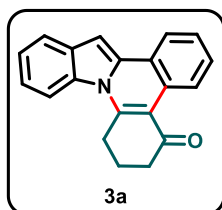

Prepared by following procedure A, obtained as pale yellow solid; (22 mg, Yield = 76%), m.p. 164-165 °C, R<sub>f</sub> = 0.5 (ethyl acetate/hexane: 25:75).

<sup>1</sup>H NMR (500 MHz, CDCl<sub>3</sub>) δ 9.22 (dd, *J* = 8.3, 0.9 Hz, 1H), 8.09 – 8.06 (m, 2H), 7.80 (d, *J* = 7.8 Hz, 1H), 7.51 (ddd, *J* = 8.4, 7.1, 1.5 Hz, 1H), 7.46 (td, *J* = 7.5, 1.3 Hz, 1H), 7.42 – 7.39 (m, 1H), 7.31 (ddd, *J* = 8.5, 7.1, 1.3 Hz, 1H), 7.22 (s, 1H), 3.63 (t, *J* = 6.1 Hz, 2H), 2.75 (t, *J* = 6.8 Hz, 2H), 2.29 (p, *J* = 6.3, z12.7 Hz, 2H).

<sup>13</sup>C NMR (126 MHz, CDCl<sub>3</sub>) δ 197.7, 151.0, 136.3, 133.6, 131.6, 128.4, 127.3, 127.0, 126.1, 124.6, 123.5, 123.1, 121.8, 121.2, 116.3, 113.6, 97.1, 38.9, 30.7, 21.5.

IR (Neat, ν/cm<sup>-1</sup>) 3116, 3002, 2920, 2864, 1628, 1559, 1457, 1378, 1281, 1182, 1050, 941, 850, 761.

HRMS (ESI) *m/z*: [M+H]<sup>+</sup> calcd for C<sub>20</sub>H<sub>16</sub>NO 286.1227; Found 286.1226.

### 3-methyl-7,8-dihydroindolo[1,2-*f*]phenanthridin-5(6*H*)-one (**3b**):

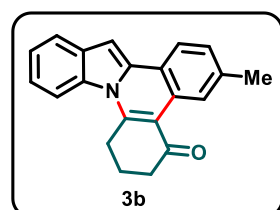

Prepared by following procedure A, obtained as pale yellow solid; (22 mg, Yield = 73%), m.p. 204-205 °C, R<sub>f</sub> = 0.5 (ethyl acetate/hexane: 25:75).

<sup>1</sup>H NMR (500 MHz, CDCl<sub>3</sub>) δ 8.90 (d, *J* = 2.5 Hz, 1H), 8.07 (d, *J* = 8.6 Hz, 1H), 7.99 (d, *J* = 8.7 Hz, 1H), 7.77 (d, *J* = 7.8 Hz, 1H), 7.39 (t, *J* = 7.4 Hz, 1H), 7.29

(d,  $J = 8.3$  Hz, 1H), 7.10 (s, 1H), 7.08 (dd,  $J = 8.8, 2.5$  Hz, 1H), 3.95 (s, 3H), 3.66 (t,  $J = 5.9$  Hz, 2H), 2.76 (t,  $J = 6.2$  Hz, 2H), 2.30 (p,  $J = 6.1, 12.5$  Hz, 2H).

$^{13}\text{C}$  NMR (126 MHz,  $\text{CDCl}_3$ )  $\delta$  197.9, 159.9, 151.8, 136.6, 133.4, 132.0, 127.7, 124.6, 123.6, 121.2, 120.8, 118.2, 116.6, 116.3, 113.2, 108.9, 95.4, 55.6, 39.0, 30.8, 21.5.

IR (Neat,  $\text{v}/\text{cm}^{-1}$ ) 3030, 2951, 2923, 2853, 1738, 1637, 1608, 1593, 1568, 1485, 1455, 1409, 1392, 1353, 1316, 1292, 1250, 1226, 1184, 1160, 1084, 1054, 1021, 1002, 931, 876.

HRMS (ESI)  $m/z$ :  $[\text{M}+\text{H}]^+$  calcd for  $\text{C}_{21}\text{H}_{18}\text{NO}$  300.1383; Found 300.1376.

### 3-ethyl-7,8-dihydroindolo[1,2-*f*]phenanthridin-5(6*H*)-one (3c):

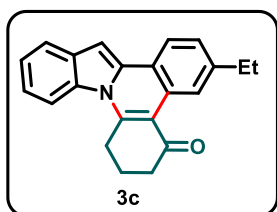

Prepared by following procedure A, obtained as pale yellow solid; (24 mg, Yield = 78%), m.p. 180-181 °C,  $R_f = 0.5$  (ethyl acetate/hexane: 25:75).

$^1\text{H}$  NMR (500 MHz,  $\text{CDCl}_3$ )  $\delta$  9.09 (s, 1H), 8.09 – 8.05 (m, 1H), 8.01 (t,  $J = 7.0$  Hz, 1H), 7.78 (d,  $J = 7.8$  Hz, 1H), 7.39 (t,  $J = 7.5$  Hz, 1H), 7.33 (d,  $J = 8.1$  Hz, 1H), 7.31 – 7.27 (m, 1H), 7.18 (d,  $J = 7.2$  Hz, 1H), 3.67 – 3.60 (m, 2H), 2.81 (q,  $J = 7.6$  Hz, 2H), 2.77 – 2.72 (m, 2H), 2.31 – 2.25 (m, 2H), 1.33 (t,  $J = 7.6$  Hz, 3H).

$^{13}\text{C}$  NMR (126 MHz,  $\text{CDCl}_3$ )  $\delta$  197.8, 151.1, 144.9, 136.6, 133.6, 131.8, 127.5, 126.2, 125.9, 123.4, 123.2, 122.5, 121.5, 121.0, 116.3, 113.7, 96.4, 39.0, 30.8, 29.6, 21.5, 15.9.

IR (Neat,  $\text{v}/\text{cm}^{-1}$ ) 2961, 2944, 2865, 1635, 1592, 1569, 1483, 1417, 1393, 1352, 1332, 1282, 1250, 1158, 1126, 1083, 1009, 929, 884.

HRMS (ESI)  $m/z$ :  $[\text{M}+\text{H}]^+$  calcd for  $\text{C}_{22}\text{H}_{20}\text{NO}$  314.1540; Found 314.1532.

### 3-(*tert*-butyl)-7,8-dihydroindolo[1,2-*f*]phenanthridin-5(6*H*)-one (3d):

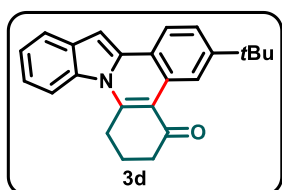

Prepared by following procedure A, obtained as pale yellow solid; (24 mg, Yield = 70%), m.p. 174-175 °C,  $R_f = 0.5$  (ethyl acetate/hexane: 25:75).

$^1\text{H}$  NMR (500 MHz,  $\text{CDCl}_3$ )  $\delta$  9.36 (d,  $J = 1.9$  Hz, 1H), 8.13 (d,  $J = 8.6$  Hz, 1H), 8.08 (d,  $J = 8.4$  Hz, 1H), 7.81 (d,  $J = 7.4$  Hz, 1H), 7.57 (dd,  $J = 8.4, 2.0$  Hz, 1H), 7.40 (t,  $J = 7.4$  Hz, 1H), 7.31 (ddd,  $J = 8.4, 7.1, 1.3$  Hz, 1H), 7.26 (s, 1H), 3.71 (t,  $J = 6.1$  Hz, 2H), 2.78 (t,  $J = 6.4$  Hz, 2H), 2.32 (p,  $J = 12.8, 6.3$  Hz, 2H), 1.44 (s, 9H).

$^{13}\text{C}$  NMR (126 MHz,  $\text{CDCl}_3$ )  $\delta$  197.8, 151.5, 151.0, 136.4, 133.5, 131.7, 128.8, 127.2, 125.9, 125.0, 123.4, 123.3, 122.8, 122.2, 121.4, 121.0, 116.2, 113.7, 96.3, 39.0, 31.4, 30.7, 29.7, 21.5.

**IR (Neat,  $\nu/\text{cm}^{-1}$ )** 3052, 2946, 2924, 2854, 1738, 1650, 1593, 1567, 1486, 1455, 1435, 1392, 1359, 1331, 1283, 1258, 1183, 1108, 1060, 1009, 926, 906, 888.

**HRMS (ESI)  $m/z$ :**  $[\text{M}+\text{H}]^+$  calcd for  $\text{C}_{24}\text{H}_{24}\text{NO}$  342.1853; Found 342.1847.

### 3-methoxy-7,8-dihydroindolo[1,2-*f*]phenanthridin-5(6*H*)-one (3e):

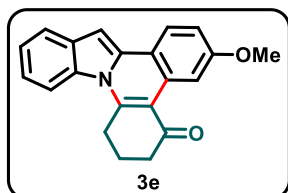

Prepared by following procedure A, obtained as pale yellow solid; (22 mg, Yield = 71%), m.p. 145-146 °C,  $R_f$  = 0.5 (ethyl acetate/hexane: 25:75).

**$^1\text{H}$  NMR (500 MHz,  $\text{CDCl}_3$ )**  $\delta$  8.88 (d,  $J$  = 2.1 Hz, 1H), 8.03 (d,  $J$  = 8.5 Hz, 1H), 7.95 (d,  $J$  = 8.8 Hz, 1H), 7.75 (d,  $J$  = 7.8 Hz, 1H), 7.38 (t,  $J$  = 7.4 Hz, 1H), 7.27 (d,  $J$  = 10.0 Hz, 1H), 7.07 – 7.03 (m, 2H), 3.94 (s, 3H), 3.60 (t,  $J$  = 5.9 Hz, 2H), 2.73 (t,  $J$  = 6.8 Hz, 2H), 2.27 (p,  $J$  = 6.3, 12.2 Hz, 2H).

**$^{13}\text{C}$  NMR (126 MHz,  $\text{CDCl}_3$ )**  $\delta$  197.9, 159.9, 151.7, 136.5, 133.4, 132.0, 127.7, 124.6, 123.5, 121.1, 120.8, 118.2, 116.5, 116.3, 113.1, 108.9, 95.3, 55.5, 39.0, 30.7, 21.4.

**IR (Neat,  $\nu/\text{cm}^{-1}$ )** 3001, 2970, 2931, 2839, 1738, 1640, 1610, 1593, 1569, 1485, 1443, 1421, 1390, 1331, 1296, 1258, 1229, 1165, 1037, 1012, 998, 907, 888.

**HRMS (ESI)  $m/z$ :**  $[\text{M}+\text{H}]^+$  calcd for  $\text{C}_{21}\text{H}_{18}\text{NO}_2$  316.1333; Found 316.1337.

### 3-fluoro-7,8-dihydroindolo[1,2-*f*]phenanthridin-5(6*H*)-one (3f):

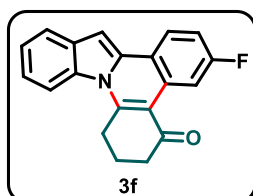

Prepared by following procedure A, obtained as pale yellow solid; (18 mg, Yield = 59%), m.p. 170-171 °C,  $R_f$  = 0.5 (ethyl acetate/hexane: 25:75).

**$^1\text{H}$  NMR (500 MHz,  $\text{CDCl}_3$ )**  $\delta$  9.04 (dd,  $J$  = 12.6, 2.6 Hz, 1H), 8.06 (d,  $J$  = 8.6 Hz, 1H), 7.98 (dd,  $J$  = 8.8, 5.9 Hz, 1H), 7.78 (d,  $J$  = 7.8 Hz, 1H), 7.41 (t,  $J$  = 7.4 Hz, 1H), 7.32 (ddd,  $J$  = 8.4, 7.1, 1.2 Hz, 1H), 7.17 – 7.13 (m, 1H), 7.12 (s, 1H), 3.61 (t,  $J$  = 7.2 Hz, 2H), 2.73 (t,  $J$  = 6.1 Hz, 2H), 2.28 (t,  $J$  = 6.3, 12.7 Hz, 2H).

**$^{13}\text{C}$  NMR (126 MHz,  $\text{CDCl}_3$ )**  $\delta$  197.3, 162.8 (d,  $J$  = 245.0 Hz), 152.0, 135.8, 133.6, 131.7, 127.9 (d,  $J$  = 10.3 Hz), 125.0 (d,  $J$  = 9.0 Hz), 123.8, 121.9, 121.1 (2C), 116.4, 115.5 (d,  $J$  = 23.9 Hz), 113.1 (d,  $J$  = 25.9 Hz), 112.7 (d,  $J$  = 3.4 Hz), 96.8, 38.8, 30.7, 21.4.

**$^{19}\text{F}$  NMR (470 MHz,  $\text{CDCl}_3$ )**  $\delta$  -106.92

**IR (Neat,  $\nu/\text{cm}^{-1}$ )** 3131, 3069, 2961, 1640, 1607, 1595, 1573, 1455, 1418, 1393, 1360, 1332, 1290, 1267, 1182, 1152, 1105, 1084, 1030, 933, 914, 888.

**HRMS (ESI)  $m/z$ :**  $[\text{M}+\text{H}]^+$  calcd for  $\text{C}_{20}\text{H}_{15}\text{FNO}$  304.1133; Found 304.1133.



### 3-chloro-7,8-dihydroindolo[1,2-*f*]phenanthridin-5(6*H*)-one (3g):

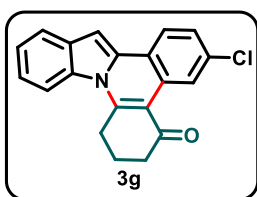

Prepared by following procedure A, obtained as pale yellow solid; (22 mg, Yield = 69%), m.p. 228-229 °C,  $R_f = 0.5$  (ethyl acetate/hexane: 25:75).

$^1\text{H NMR}$  (500 MHz,  $\text{CDCl}_3$ )  $\delta$  9.24 (d,  $J = 2.1$  Hz, 1H), 7.99 (d,  $J = 8.6$  Hz, 1H), 7.74 (d,  $J = 8.6$  Hz, 2H), 7.41 (t,  $J = 7.4$  Hz, 1H), 7.31 (t,  $J = 7.8$  Hz, 1H), 7.25 (dd,  $J = 8.6, 2.2$  Hz, 1H), 7.02 (s, 1H), 3.47 (t,  $J = 6.1$  Hz, 2H), 2.67 (t,  $J = 7.1$  Hz, 2H), 2.22 (p,  $J = 6.3, 12.9$  Hz, 2H).

$^{13}\text{C NMR}$  (126 MHz,  $\text{CDCl}_3$ )  $\delta$  197.2, 151.8, 135.3, 134.3, 133.6, 131.5, 127.4, 127.2, 126.5, 124.2, 123.7, 122.8, 122.1, 121.2, 116.4, 112.4, 97.3, 38.7, 30.6, 21.3.

**IR** (Neat,  $\text{v}/\text{cm}^{-1}$ ) 3112, 3053, 2934, 2850, 1653, 1609, 1596, 1566, 1533, 1467, 1432, 1409, 1388, 1352, 1290, 1264, 1204, 1180, 1134, 1108, 1054, 1027, 961, 925, 891.

**HRMS** (ESI)  $m/z$ :  $[\text{M}+\text{H}]^+$  calcd for  $\text{C}_{20}\text{H}_{15}\text{ClNO}$  320.0837; Found 320.0834.

### 3-bromo-7,8-dihydroindolo[1,2-*f*]phenanthridin-5(6*H*)-one (3h):

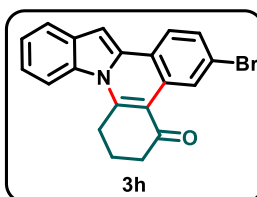

Prepared by following procedure A, obtained as pale yellow solid; (24 mg, Yield = 65%), m.p. 234-235 °C,  $R_f = 0.5$  (ethyl acetate/hexane: 25:75).

$^1\text{H NMR}$  (500 MHz,  $\text{CDCl}_3$ )  $\delta$  9.42 (d,  $J = 1.8$  Hz, 1H), 8.02 (d,  $J = 8.5$  Hz, 1H), 7.77 (d,  $J = 7.8$  Hz, 1H), 7.73 (d,  $J = 8.5$  Hz, 1H), 7.42 (dd,  $J = 5.0, 12.5$  Hz, 2H), 7.33 (ddd,  $J = 8.4, 7.2, 1.2$  Hz, 1H), 7.09 (s, 1H), 3.53 (t,  $J = 5.8$  Hz, 2H), 2.69 (t,  $J = 7.11$  Hz, 2H), 2.24 (p,  $J = 6.2, 12.5$  Hz, 2H).

$^{13}\text{C NMR}$  (126 MHz,  $\text{CDCl}_3$ )  $\delta$  197.2, 151.9, 135.4, 133.6, 131.5, 130.3, 129.6, 127.5, 124.4, 123.8, 123.2, 122.7, 122.2, 121.3, 116.4, 112.4, 97.5, 38.7, 30.6, 21.3.

**IR** (Neat,  $\text{v}/\text{cm}^{-1}$ ) 3110, 3048, 2959, 2929, 2857, 1654, 1604, 1595, 1565, 1478, 1455, 1430, 1388, 1352, 1289, 1263, 1203, 1180, 1134, 1080, 1053, 1028, 1007, 932, 858.

**HRMS** (ESI)  $m/z$ :  $[\text{M}+\text{H}]^+$  calcd for  $\text{C}_{20}\text{H}_{15}\text{BrNO}$  364.0332; Found 364.0333.

### 3-(trifluoromethyl)-7,8-dihydroindolo[1,2-*f*]phenanthridin-5(6*H*)-one (3i):

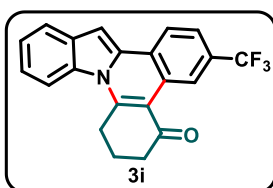

Prepared by following procedure A, obtained as pale yellow solid; (24 mg, Yield = 68%), m.p. 230-231 °C,  $R_f = 0.5$  (ethyl acetate/hexane: 25:75).

$^1\text{H NMR}$  (500 MHz,  $\text{CDCl}_3$ )  $\delta$  9.59 (s, 1H), 8.06 (d,  $J = 8.6$  Hz, 1H), 8.01 (d,  $J = 8.3$  Hz, 1H), 7.82 (d,  $J = 7.8$  Hz, 1H), 7.59 (d,  $J = 8.3$  Hz, 1H), 7.44 (t,  $J = 7.4$  Hz,

1H), 7.37 (t,  $J = 7.8$  Hz, 1H), 7.24 (s, 1H), 3.55 (t,  $J = 6.0$  Hz, 2H), 2.71 (t,  $J = 6.4$  Hz, 2H), 2.26 (t,  $J = 6.2, 12.6$  Hz, 2H).

$^{13}\text{C}$  NMR (126 MHz,  $\text{CDCl}_3$ )  $\delta$  197.3, 152.0, 134.9, 133.8, 131.3, 129.9, 127.0, 126.0, 124.5 (q,  $J = 4.2$  Hz), 124.4 (q,  $J = 272.4$ ), 123.9, 123.6, 123.5, (d,  $J = 3.5$  Hz), 122.6 (q,  $J = 245.9$  Hz), 121.6, 116.4, 112.7, 98.9, 38.7, 30.6, 21.3.

$^{19}\text{F}$  NMR (470 MHz,  $\text{CDCl}_3$ )  $\delta$  -62.22.

IR (Neat,  $\text{v}/\text{cm}^{-1}$ ) 3112, 3062, 2954, 1652, 1608, 1595, 1562, 1488, 1473, 1422, 1394, 1364, 1346, 1296, 1265, 1183, 1157, 1079, 1028, 915, 870.

HRMS (ESI)  $m/z$ :  $[\text{M}+\text{H}]^+$  calcd for  $\text{C}_{21}\text{H}_{15}\text{F}_3\text{NO}$  354.1101; Found 354.1102.

### 5-oxo-5,6,7,8-tetrahydroindolo[1,2-f]phenanthridine-3-carbonitrile (3j):

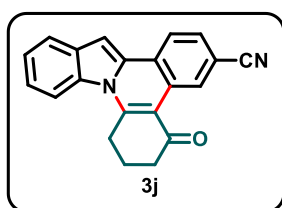

Prepared by following procedure A, obtained as pale yellow solid; (18 mg, Yield = 57%), m.p. 265-267 °C,  $R_f = 0.5$  (ethyl acetate/hexane: 32:68).

$^1\text{H}$  NMR (500 MHz,  $\text{CDCl}_3$ )  $\delta$  9.66 (d,  $J = 1.3$  Hz, 1H), 8.13 (d,  $J = 8.4$  Hz, 1H), 8.09 (d,  $J = 8.3$  Hz, 1H), 7.86 (d,  $J = 7.5$  Hz, 1H), 7.61 (dd,  $J = 8.3, 1.5$  Hz, 1H), 7.47 (t,  $J = 7.2$  Hz, 1H), 7.44 – 7.40 (m, 1H), 7.38 (s, 1H), 3.67 (t,  $J = 6.1$  Hz, 2H), 2.76 (t,  $J = 6.2$  Hz, 2H), 2.32 (p,  $J = 12.7, 6.2$  Hz, 2H).

$^{13}\text{C}$  NMR (126 MHz,  $\text{CDCl}_3$ )  $\delta$  197.2, 152.5, 134.5, 134.04, 131.9, 131.3, 131.3, 129.6, 128.0, 127.8, 126.2, 124.2, 123.7, 123.3, 121.9, 119.5, 116.5, 100.1, 38.7, 30.8, 21.3.

IR (Neat,  $\text{v}/\text{cm}^{-1}$ ) 3129, 3104, 3055, 2951, 2219, 1639, 1594, 1567, 1527, 1483, 1455, 1333, 1293, 1277, 1255, 1187, 1142, 1027, 1014, 913, 888, 849.

HRMS (ESI)  $m/z$ :  $[\text{M}+\text{H}]^+$  calcd for  $\text{C}_{21}\text{H}_{15}\text{N}_2\text{O}$  311.1179; Found 311.1178.

### 2-methoxy-7,8-dihydroindolo[1,2-f]phenanthridin-5(6H)-one (3k):

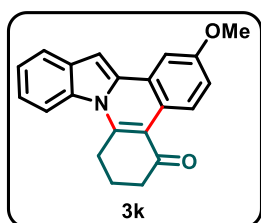

Prepared by following procedure A, obtained as pale yellow solid; (21 mg, Yield = 67%), m.p. 170-171 °C,  $R_f = 0.5$  (ethyl acetate/hexane: 28:72).

$^1\text{H}$  NMR (500 MHz,  $\text{CDCl}_3$ )  $\delta$  9.20 (d,  $J = 9.2$  Hz, 1H), 8.10 (d,  $J = 8.6$  Hz, 1H), 7.81 (d,  $J = 7.8$  Hz, 1H), 7.49 (d,  $J = 2.7$  Hz, 1H), 7.40 (t,  $J = 7.4$  Hz, 1H), 7.34 – 7.29 (m, 1H), 7.21 (s, 1H), 7.11 (dd,  $J = 9.2, 2.8$  Hz, 1H), 3.95 (s, 3H), 3.65 (t,  $J = 6.1$  Hz, 2H), 2.74 (t,  $J = 7.1$  Hz, 2H), 2.29 (p,  $J = 6.5, 13.1$  Hz, 2H).

$^{13}\text{C}$  NMR (126 MHz,  $\text{CDCl}_3$ )  $\delta$  197.8, 158.6, 149.1, 136.2, 133.8, 131.5, 129.0, 126.2, 123.4, 121.8, 121.2, 119.9, 116.5, 116.3, 113.7, 105.7, 97.1, 55.5, 38.9, 30.6, 21.6.

**IR (Neat,  $\nu/\text{cm}^{-1}$ )** 3065, 3023, 2970, 1945, 2846, 1738, 1633, 1593, 1554, 1494, 1455, 1422, 1378, 1365, 1314, 1294, 1285, 1216, 1135, 1086, 1040, 1008, 950, 877.

**HRMS (ESI)  $m/z$ :**  $[\text{M}+\text{H}]^+$  calcd for  $\text{C}_{21}\text{H}_{18}\text{NO}_2$  316.1333; Found 316.1326.

**2-bromo-7,8-dihydroindolo[1,2-*f*]phenanthridin-5(6*H*)-one (3l):**

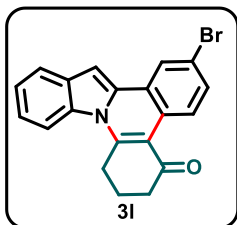

Prepared by following procedure A, obtained as pale yellow solid; (22 mg, Yield = 61%), m.p. 201-202 °C,  $R_f$  = 0.5 (ethyl acetate/hexane: 25:75).

**$^1\text{H}$  NMR (500 MHz,  $\text{CDCl}_3$ )**  $\delta$  9.13 (d,  $J$  = 9.0 Hz, 1H), 8.15 (d,  $J$  = 2.1 Hz, 1H), 8.08 (d,  $J$  = 8.5 Hz, 1H), 7.81 (d,  $J$  = 7.5 Hz, 1H), 7.56 (dd,  $J$  =

9.0, 2.2 Hz, 1H), 7.43 (t,  $J$  = 7.7 Hz, 1H), 7.35 (ddd,  $J$  = 8.5, 7.1, 1.3 Hz, 1H), 7.19 (s, 1H), 3.61 (t,  $J$  = 6.1 Hz, 2H), 2.73 (t,  $J$  = 6.5 Hz, 2H), 2.29 (p,  $J$  = 6.1, 12.6 Hz, 2H).

**$^{13}\text{C}$  NMR (126 MHz,  $\text{CDCl}_3$ )**  $\delta$  197.4, 151.2, 134.6, 133.7, 131.3, 131.2, 128.9, 126.3, 125.5, 124.8, 123.7, 122.3, 121.4, 121.2, 116.3, 112.9, 97.9, 38.8, 30.6, 21.3.

**IR (Neat,  $\nu/\text{cm}^{-1}$ )** 3136, 3044, 2961, 2892, 1737, 1637, 1587, 1564, 1478, 1466, 1410, 1390, 1353, 1313, 1284, 1246, 1179, 1133, 1081, 1051, 1007, 982, 944, 907.

**HRMS (ESI)  $m/z$ :**  $[\text{M}+\text{H}]^+$  calcd for  $\text{C}_{20}\text{H}_{15}\text{BrNO}$  364.0332; Found 364.0333.

**2,3-dichloro-7,8-dihydroindolo[1,2-*f*]phenanthridin-5(6*H*)-one (3m):**

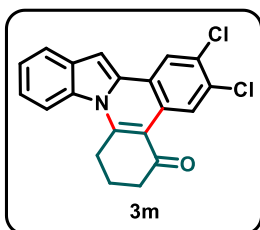

Prepared by following procedure A, obtained as pale yellow solid; (17.6 mg, Yield = 50%), m.p. 170-171 °C,  $R_f$  = 0.5 (ethyl acetate/hexane: 25:75).

**$^1\text{H}$  NMR (500 MHz,  $\text{CDCl}_3$ )**  $\delta$  9.46 (s, 1H), 8.09 (d,  $J$  = 9.3 Hz, 2H), 7.82 (d,  $J$  = 7.5 Hz, 1H), 7.44 (t,  $J$  = 7.2 Hz, 1H), 7.37 (ddd,  $J$  = 8.4, 7.1,

1.3 Hz, 1H), 7.22 (s, 1H), 3.65 (t,  $J$  = 6.1 Hz, 2H), 2.74 (t,  $J$  = 6.5 Hz, 2H), 2.30 (p,  $J$  = 6.5, 12.9 Hz, 2H).

**$^{13}\text{C}$  NMR (126 MHz,  $\text{CDCl}_3$ )**  $\delta$  197.0, 152.0, 134.1, 133.7, 132.3, 131.3, 131.2, 128.7, 125.5, 124.3, 124.1, 124.0, 122.7, 121.5, 116.4, 111.9, 98.3, 38.6, 30.6, 21.2.

**IR (Neat,  $\nu/\text{cm}^{-1}$ )** 3118, 3034, 2942, 2867, 1738, 1653, 1634, 1596, 1567, 1537, 1478, 1453, 1433, 1355, 1331, 1314, 1277, 1244, 1207, 1171, 1130, 1055, 1010, 952, 904, 867.

**HRMS (ESI)  $m/z$ :**  $[\text{M}+\text{H}]^+$  calcd for  $\text{C}_{20}\text{H}_{14}\text{Cl}_2\text{NO}$  354.0447; Found 354.0450.

### 7,8-dihydrobenzo[*j*]indolo[1,2-*f*]phenanthridin-9(6*H*)-one (3n):

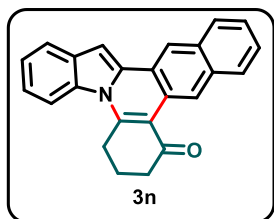

Prepared by following procedure A, obtained as yellow solid; (22 mg, Yield = 65%), m.p. 195-196 °C,  $R_f = 0.5$  (ethyl acetate/hexane: 25:75).

$^1\text{H NMR}$  (500 MHz,  $\text{CDCl}_3$ )  $\delta$  9.71 (s, 1H), 8.33 (s, 1H), 7.98 – 7.95 (m, 1H), 7.94 (d,  $J = 8.5$  Hz, 1H), 7.81 – 7.78 (m, 1H), 7.75 (d,  $J = 7.6$  Hz, 1H), 7.47 (dd,  $J = 6.3, 3.1$  Hz, 2H), 7.38 (t,  $J = 7.3$  Hz, 1H), 7.31 – 7.27 (m, 1H), 7.24 (s, 1H), 3.47 (t,  $J = 6.1$  Hz, 2H), 2.70 (t,  $J = 7.0$  Hz, 2H), 2.22 (p,  $J = 6.4, 13.1$  Hz, 2H).

$^{13}\text{C NMR}$  (126 MHz,  $\text{CDCl}_3$ )  $\delta$  197.7, 151.2, 136.1, 134.2, 133.4, 131.8, 131.4, 129.2, 127.4, 126.4, 126.2, 126.1, 123.9, 123.3, 123.1, 122.3, 121.4, 121.2, 116.1, 113.3, 99.1, 38.9, 30.6, 21.4.

**IR** (Neat,  $\text{v}/\text{cm}^{-1}$ ) 3030, 2970, 2938, 1738, 1623, 1589, 1561, 1535, 1494, 1457, 1428, 1366, 1354, 1228, 1217, 1010, 963, 901, 875.

**HRMS (ESI)**  $m/z$ :  $[\text{M}+\text{H}]^+$  calcd for  $\text{C}_{24}\text{H}_{18}\text{NO}$  336.1383; Found 336.1374.

### 9,10-dihydrobenzo[*i*]indolo[1,2-*f*]phenanthridin-7(8*H*)-one (3o):

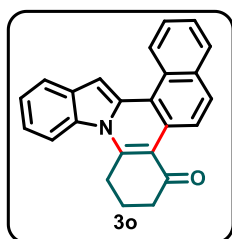

Prepared by following procedure A, obtained as pale yellow solid; (19 mg, Yield = 58%), m.p. 148-149 °C,  $R_f = 0.5$  (ethyl acetate/hexane: 25:75).

$^1\text{H NMR}$  (500 MHz,  $\text{CDCl}_3$ )  $\delta$  9.23 (d,  $J = 9.0$  Hz, 1H), 9.11 (d,  $J = 8.6$  Hz, 1H), 8.23 (d,  $J = 8.6$  Hz, 1H), 7.97 (d,  $J = 7.9$  Hz, 1H), 7.92 (d,  $J = 8.9$  Hz, 2H), 7.87 (s, 1H), 7.70 (t,  $J = 8.4$  Hz, 1H), 7.61 (t,  $J = 7.8$  Hz, 1H), 7.47 (t,  $J = 7.4$  Hz, 1H), 7.39 (t,  $J = 7.2$  Hz, 1H), 3.79 (t,  $J = 6.1$  Hz, 2H), 2.83 (t,  $J = 6.4$  Hz, 2H), 2.37 (p,  $J = 6.3, 12.7$  Hz, 2H).

$^{13}\text{C NMR}$  (126 MHz,  $\text{CDCl}_3$ )  $\delta$  197.5, 150.8, 135.8, 133.0, 132.7, 132.0, 129.3, 128.8 (2C), 128.6 (2C), 127.0, 126.4, 126.3, 125.6, 124.2, 123.8, 122.1, 121.2, 116.3, 102.4, 39.1, 31.2, 21.8.

**IR** (Neat,  $\text{v}/\text{cm}^{-1}$ ) 3054, 2951, 5928, 2850, 1737, 1644, 1585, 1566, 1524, 1464, 1432, 1375, 1335, 1288, 1217, 1182, 1128, 1051, 1007, 986, 912, 895.

**HRMS (ESI)**  $m/z$ :  $[\text{M}+\text{H}]^+$  calcd for  $\text{C}_{24}\text{H}_{18}\text{NO}$  336.1383; Found 336.1384.

### 14-methyl-7,8-dihydroindolo[1,2-*f*]phenanthridin-5(6*H*)-one (3p):

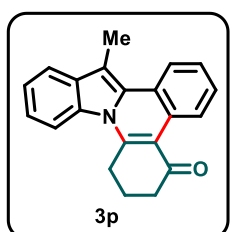

Prepared by following procedure A, obtained as pale yellow solid; (25 mg, Yield = 82%), m.p. 162-163 °C,  $R_f = 0.5$  (ethyl acetate/hexane: 26:74).

**<sup>1</sup>H NMR (500 MHz, CDCl<sub>3</sub>)** δ 9.23 (dd, *J* = 7.8, 1.8 Hz, 1H), 8.23 (dd, *J* = 7.8, 1.7 Hz, 1H), 8.04 (d, *J* = 8.6 Hz, 1H), 7.79 (d, *J* = 7.4 Hz, 1H), 7.52 – 7.47 (m, 2H), 7.46 – 7.42 (m, 1H), 7.36-7.31 (m, 1H), 3.56 (t, *J* = 6.1 Hz, 2H), 2.75 – 2.72 (m, 2H), 2.71 (s, 3H), 2.24 (p, *J* = 12.8, 6.3 Hz, 2H).

**<sup>13</sup>C NMR (126 MHz, CDCl<sub>3</sub>)** δ 197.3, 151.2, 132.6, 132.1, 130.9, 127.3, 126.8, 126.7, 126.5, 126.2, 124.3, 122.9, 121.9, 118.8, 116.2, 113.0, 107.8, 38.8, 30.8, 21.5, 11.8.

**IR (Neat, v/cm<sup>-1</sup>)** 3118, 3037, 2969, 2952, 2875, 1738, 1644, 1585, 1569, 1536, 1476, 1453, 1435, 1394, 1383, 1328, 1247, 1231, 1216, 1181, 1126, 1079, 1053, 1031, 989, 948.

**HRMS (ESI) *m/z*:** [M+H]<sup>+</sup> calcd for C<sub>21</sub>H<sub>18</sub>NO 300.1383; Found 300.1381.

***N*-(2-(5-oxo-5,6,7,8-tetrahydroindolo[1,2-*f*]phenanthridin-14-yl)ethyl)acetamide (3q):**

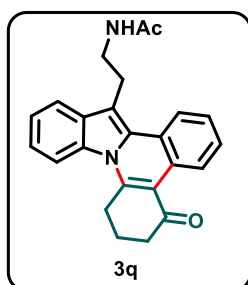

Prepared by following procedure A, obtained as pale yellow solid; (28 mg, Yield = 75%), m.p. 224-225 °C, *R<sub>f</sub>* = 0.2 (ethyl acetate/hexane: 98:02).

**<sup>1</sup>H NMR (500 MHz, CDCl<sub>3</sub>)** δ 9.25 – 9.21 (m, 1H), 8.40 (d, *J* = 7.4 Hz, 1H), 8.12 (d, *J* = 8.6 Hz, 1H), 7.86 (d, *J* = 7.9 Hz, 1H), 7.57 – 7.50 (m, 2H), 7.46 (t, *J* = 7.4 Hz, 1H), 7.37 (t, *J* = 7.8 Hz, 1H), 5.67 (bs, 1H), 3.71 – 3.64 (m, 4H), 3.56 (t, *J* = 7.1 Hz, 2H), 2.75 (t, *J* = 6.6 Hz, 2H), 2.29 (p, *J* = 12.6, 6.2 Hz, 2H), 1.89 (s, 3H).

**<sup>13</sup>C NMR (126 MHz, CDCl<sub>3</sub>)** δ 197.2, 170.6, 150.9, 132.5, 132.4, 131.6, 128.0, 127.3, 126.9, 126.8, 125.6, 123.8, 123.3, 122.4, 118.7, 116.3, 113.6, 109.2, 39.0, 38.8, 31.1, 25.7, 23.3, 21.6.

**IR (Neat, v/cm<sup>-1</sup>)** 3394, 2938, 1658, 1647, 1586, 1513, 1507, 1482, 1451, 1387, 1363, 1321, 1285, 1264, 1195, 1184, 1148, 1114, 1083, 1027, 979, 881.

**HRMS (ESI) *m/z*:** [M+H]<sup>+</sup> calcd for C<sub>24</sub>H<sub>23</sub>N<sub>2</sub>O<sub>2</sub> 371.1755; Found 371.1759.

**5-oxo-5,6,7,8-tetrahydroindolo[1,2-*f*]phenanthridine-14-carbaldehyde (3r):**

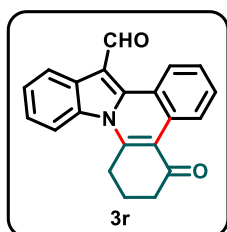

Prepared by following procedure A, obtained as pale yellow solid; (18 mg, Yield = 56%), m.p. 162-163 °C, *R<sub>f</sub>* = 0.5 (ethyl acetate/hexane: 23:77).

**<sup>1</sup>H NMR (500 MHz, CDCl<sub>3</sub>)** δ 10.74 (s, 1H), 9.25 (d, *J* = 8.3 Hz, 1H), 8.70 (d, *J* = 7.9 Hz, 1H), 8.46 (d, *J* = 8.0 Hz, 1H), 8.08 (d, *J* = 8.6 Hz, 1H), 7.72 – 7.68 (m, 1H), 7.59 (t, *J* = 8.1 Hz, 1H), 7.52 (t, *J* = 7.5 Hz, 1H), 7.42 – 7.38 (m, 1H), 3.69 (t, *J* = 6.1 Hz, 2H), 2.80 (t, *J* = 6.6 Hz, 2H), 2.32 (p, *J* = 6.5, 12.5 Hz, 2H).

$^{13}\text{C}$  NMR (126 MHz,  $\text{CDCl}_3$ )  $\delta$  197.2, 185.8, 149.4, 142.3, 133.5, 131.1, 129.7, 128.6, 128.2, 127.8, 127.0, 125.9, 124.0, 123.7, 122.4, 116.2, 116.1, 113.0, 38.8, 31.1, 21.7.

IR (Neat,  $\text{v}/\text{cm}^{-1}$ ) 2923, 2852, 1716, 1660, 1596, 1495, 1452, 1372, 1296, 1238, 1181, 1081.

HRMS (ESI)  $m/z$ :  $[\text{M}+\text{H}]^+$  calcd for  $\text{C}_{21}\text{H}_{16}\text{NO}_2$  314.1176; Found 314.1176.

### 13-methoxy-7,8-dihydroindolo[1,2-*f*]phenanthridin-5(6*H*)-one (3s):

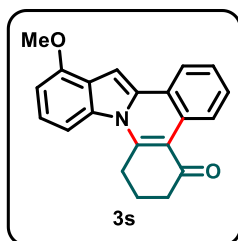

Prepared by following procedure A, obtained as pale yellow solid; (21 mg, Yield = 68%), m.p. 191-192 °C,  $R_f$  = 0.5 (ethyl acetate/hexane: 25:75).

$^1\text{H}$  NMR (500 MHz,  $\text{CDCl}_3$ )  $\delta$  9.19 (d,  $J$  = 8.0 Hz, 1H), 8.09 (d,  $J$  = 7.4 Hz, 1H), 7.66 (d,  $J$  = 8.6 Hz, 1H), 7.51 – 7.42 (m, 2H), 7.38 (s, 1H), 7.21 (t,  $J$  = 8.2 Hz, 1H), 6.80 (d,  $J$  = 7.8 Hz, 1H), 4.03 (s, 3H), 3.61 (t,  $J$  = 6.0 Hz, 2H), 2.74 (t,  $J$  = 6.3 Hz, 2H), 2.27 (t,  $J$  = 6.5, 12.8 Hz, 2H).

$^{13}\text{C}$  NMR (126 MHz,  $\text{CDCl}_3$ )  $\delta$  197.7, 153.1, 151.0, 135.0, 134.6, 128.1, 127.4, 127.0, 125.9, 125.0, 122.9, 122.5 (2C), 113.9, 109.4, 102.9, 94.1, 55.7, 38.9, 30.6, 21.5.

IR (Neat,  $\text{v}/\text{cm}^{-1}$ ) 3049, 2957, 2835, 1653, 1636, 1596, 1559, 1545, 1473, 1419, 1394, 1331, 1254, 1178, 1102, 1075, 1034, 981, 926.

HRMS (ESI)  $m/z$ :  $[\text{M}+\text{H}]^+$  calcd for  $\text{C}_{21}\text{H}_{18}\text{NO}_2$  316.1333; Found 316.1332.

### 12-methyl-7,8-dihydroindolo[1,2-*f*]phenanthridin-5(6*H*)-one (3t):

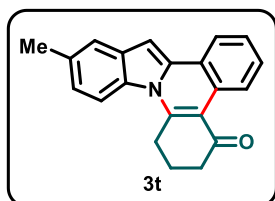

Prepared by following procedure A, obtained as pale yellow solid; (22 mg, Yield = 72%), m.p. 209-210 °C,  $R_f$  = 0.5 (ethyl acetate/hexane: 25:75).

$^1\text{H}$  NMR (500 MHz,  $\text{CDCl}_3$ )  $\delta$  9.23 (dd,  $J$  = 8.3, 0.7 Hz, 1H), 8.04 (dd,  $J$  = 7.8, 1.1 Hz, 1H), 7.92 (d,  $J$  = 8.7 Hz, 1H), 7.55 (s, 1H), 7.51 – 7.47 (m, 1H), 7.46 – 7.42 (m, 1H), 7.13 (s, 1H), 7.11 (dd,  $J$  = 8.8, 1.4 Hz, 1H), 3.57 (t,  $J$  = 6.1 Hz, 2H), 2.73 (t,  $J$  = 6.7 Hz, 2H), 2.52 (s, 3H), 2.27 (p,  $J$  = 12.7, 6.3 Hz, 2H).

$^{13}\text{C}$  NMR (126 MHz,  $\text{CDCl}_3$ )  $\delta$  197.6, 151.0, 136.3, 133.1, 131.9, 131.9, 128.3, 127.1, 126.9, 126.1, 124.5, 123.3, 123.0, 120.8, 115.9, 113.2, 96.7, 38.9, 30.5, 21.5, 21.4.

IR (Neat,  $\text{v}/\text{cm}^{-1}$ ) 3016, 2949, 2970, 2917, 2867, 1737, 1630, 1594, 1566, 1526, 1487, 1450, 1391, 1327, 1309, 1282, 1247, 1229, 1178, 1129, 1037, 1004, 983, 953, 872.

HRMS (ESI)  $m/z$ :  $[\text{M}+\text{H}]^+$  calcd for  $\text{C}_{21}\text{H}_{18}\text{NO}$  300.1383; Found 300.1379.

### 12-methoxy-7,8-dihydroindolo[1,2-f]phenanthridin-5(6H)-one (3u):

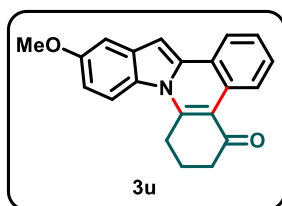

Prepared by following procedure A, obtained as pale yellow solid; (25 mg, Yield = 78%), m.p. 176-177 °C,  $R_f$  = 0.5 (ethyl acetate/hexane: 25:75).

$^1\text{H NMR}$  (500 MHz,  $\text{CDCl}_3$ )  $\delta$  9.24 (d,  $J$  = 8.3 Hz, 1H), 8.04 (dd,  $J$  = 7.9, 1.0 Hz, 1H), 7.93 (d,  $J$  = 9.3 Hz, 1H), 7.52 – 7.48 (m, 1H), 7.47 – 7.43 (m, 1H), 7.17 (d,  $J$  = 2.6 Hz, 1H), 7.13 (s, 1H), 6.91 (dd,  $J$  = 9.2, 2.6 Hz, 1H), 3.92 (s, 3H), 3.55 (t,  $J$  = 6.1 Hz, 2H), 2.73 (t,  $J$  = 7.0 Hz, 2H), 2.27 (p,  $J$  = 6.2, 12.5 Hz, 2H).

$^{13}\text{C NMR}$  (126 MHz,  $\text{CDCl}_3$ )  $\delta$  197.6, 156.3, 150.6, 136.9, 132.8, 128.5, 128.3, 127.1, 126.9, 126.1, 124.2, 123.0, 117.1, 113.0, 111.5, 102.1, 96.9, 55.7, 38.9, 30.5, 21.4.

**IR** (Neat,  $\text{v}/\text{cm}^{-1}$ ) 3122, 2989, 2952, 2938, 2832, 1737, 1633, 1594, 1525, 1487, 1463, 1450, 1396, 1348, 1325, 1292, 1284, 1180, 1087, 1038, 939, 855.

**HRMS** (ESI)  $m/z$ :  $[\text{M}+\text{H}]^+$  calcd for  $\text{C}_{21}\text{H}_{18}\text{NO}_2$  316.1333; Found 316.1337.

### 12-fluoro-7,8-dihydroindolo[1,2-f]phenanthridin-5(6H)-one (3v):

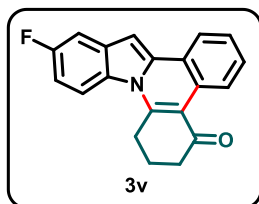

Prepared by following procedure A, obtained as pale yellow solid; (19 mg, Yield = 64%), m.p. 220-221 °C,  $R_f$  = 0.5 (ethyl acetate/hexane: 29:71).

$^1\text{H NMR}$  (500 MHz,  $\text{CDCl}_3$ )  $\delta$  9.24 (d,  $J$  = 8.4 Hz, 1H), 8.07 (dd,  $J$  = 7.9, 1.1 Hz, 1H), 8.03 (dd,  $J$  = 9.3, 4.2 Hz, 1H), 7.56 – 7.51 (m, 1H), 7.48 (t,  $J$  = 7.5 Hz, 1H), 7.41 (dd,  $J$  = 8.8, 2.6 Hz, 1H), 7.19 (s, 1H), 7.04 (td,  $J$  = 9.0, 2.6 Hz, 1H), 3.61 (t,  $J$  = 6.1 Hz, 2H), 2.76 (t,  $J$  = 7.1 Hz, 2H), 2.31 (p,  $J$  = 6.2, 12.8 Hz, 2H).

$^{13}\text{C NMR}$  (126 MHz,  $\text{CDCl}_3$ )  $\delta$  197.5, 159.6 (d,  $J$  = 241.2 Hz), 150.4, 137.7 (d,  $J$  = 10.3 Hz), 132.7, 130.2, 128.8, 127.5, 127.1, 126.2, 124.2, 123.2, 117.2 (d,  $J$  = 9.4 Hz), 113.7, 109.7 (d,  $J$  = 25.9 Hz), 105.8 (d,  $J$  = 23.3 Hz), 96.8 (d,  $J$  = 4.4 Hz), 38.9, 30.6, 21.5.

$^{19}\text{F NMR}$  (470 MHz,  $\text{CDCl}_3$ )  $\delta$  -119.20.

**IR** (Neat,  $\text{v}/\text{cm}^{-1}$ ) 3118, 3062, 2941, 287, 1645, 1596, 1578, 1529, 1486, 1467, 1432, 1392, 1361, 1350, 1277, 1247, 1178, 1149, 1127, 1086, 1057, 1006, 982.

**HRMS** (ESI)  $m/z$ :  $[\text{M}+\text{H}]^+$  calcd for  $\text{C}_{20}\text{H}_{15}\text{FNO}$  304.1133; Found 304.1129.

### 5-oxo-5,6,7,8-tetrahydroindolo[1,2-*f*]phenanthridine-12-carbonitrile (**3w**):

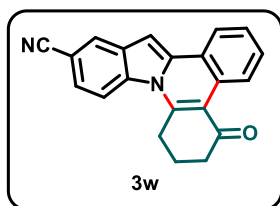

Prepared by following procedure A, obtained as pale yellow solid; (16 mg, Yield = 51%), m.p. 290-291 °C,  $R_f$  = 0.5 (ethyl acetate/hexane: 30:70).

$^1\text{H NMR}$  (500 MHz,  $\text{CDCl}_3$ )  $\delta$  9.22 (d,  $J$  = 9.1 Hz, 1H), 8.22 (d,  $J$  = 8.9 Hz, 1H), 8.15 (dd,  $J$  = 5.8, 1.5 Hz, 2H), 7.61 – 7.57 (m, 1H), 7.56 – 7.52 (m, 2H), 7.35 (s, 1H), 3.69 (t,  $J$  = 6.1 Hz, 2H), 2.80 (t,  $J$  = 6.4 Hz, 2H), 2.36 (p,  $J$  = 6.3, 12.8 Hz, 2H).

$^{13}\text{C NMR}$  (126 MHz,  $\text{CDCl}_3$ )  $\delta$  197.5, 149.7, 138.4, 131.2, 129.5, 128.0, 127.4, 126.1 (2C), 124.3, 123.9, 123.5, 119.8, 116.9, 115.2, 106.7, 102.8, 96.9, 38.9, 30.8, 21.5.

**IR** (Neat,  $\text{v}/\text{cm}^{-1}$ ) 3115, 3058, 2973, 2938, 2223, 1651, 1596, 1483, 1455, 1428, 1385, 1322, 1281, 1253, 1209, 1180, 1126, 1088, 1041, 981.

**HRMS** (ESI)  $m/z$ :  $[\text{M}+\text{H}]^+$  calcd for  $\text{C}_{21}\text{H}_{15}\text{N}_2\text{O}$  311.1179; Found 311.1176.

### 11-chloro-7,8-dihydroindolo[1,2-*f*]phenanthridin-5(6*H*)-one (**3x**):

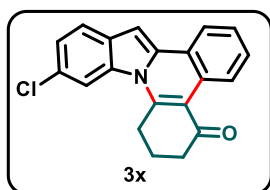

Prepared by following procedure A, obtained as pale yellow solid; (21 mg, Yield = 66%), m.p. 193-194 °C,  $R_f$  = 0.5 (ethyl acetate/hexane: 25:75).

$^1\text{H NMR}$  (500 MHz,  $\text{CDCl}_3$ )  $\delta$  9.18 (d,  $J$  = 8.3 Hz, 1H), 7.98 (s, 1H), 7.95 (d,  $J$  = 7.9 Hz, 1H), 7.63 (d,  $J$  = 8.4 Hz, 1H), 7.52 – 7.47 (m, 1H), 7.43 (t,  $J$  = 7.0 Hz, 1H), 7.35 (dd,  $J$  = 8.4, 1.6 Hz, 1H), 7.05 (s, 1H), 3.46 (t,  $J$  = 6.1 Hz, 2H), 2.72 (t,  $J$  = 6.4 Hz, 2H), 2.26 (p,  $J$  = 6.4, 13.0 Hz, 2H).

$^{13}\text{C NMR}$  (126 MHz,  $\text{CDCl}_3$ )  $\delta$  197.4, 150.1, 136.7, 133.4, 129.7, 128.5, 127.4, 127.0, 127.0, 125.8, 124.5, 123.8, 123.0, 121.5, 116.1, 113.9, 96.6, 38.7, 30.3, 21.2.

**IR** (Neat,  $\text{v}/\text{cm}^{-1}$ ) 3026, 2970, 2945, 1738, 1646, 1591, 1563, 1548, 1476, 1450, 1436, 1364, 1328, 1293, 1229, 1216, 1174, 1138, 1075, 1040, 1010, 990, 918, 861.

**HRMS** (ESI)  $m/z$ :  $[\text{M}+\text{H}]^+$  calcd for  $\text{C}_{20}\text{H}_{15}\text{ClNO}$  320.0837; Found 320.0834.

### 11-phenyl-7,8-dihydroindolo[1,2-*f*]phenanthridin-5(6*H*)-one (**3y**):

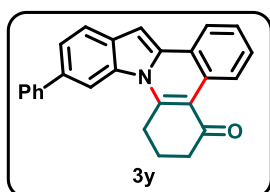

Prepared by following procedure A, obtained as pale yellow solid; (21 mg, Yield = 58%), m.p. 160-167 °C,  $R_f$  = 0.5 (ethyl acetate/hexane: 25:75).

$^1\text{H NMR}$  (500 MHz,  $\text{CDCl}_3$ )  $\delta$  9.24 (d,  $J$  = 7.7 Hz, 1H), 8.29 (s, 1H), 8.13 (dd,  $J$  = 7.8, 1.3 Hz, 1H), 7.87 (d,  $J$  = 8.2 Hz, 1H), 7.70 – 7.64 (m, 3H), 7.55 – 7.47 (m,



4H), 7.39 (t,  $J = 7.4$  Hz, 1H), 7.30 (s, 1H), 3.76 (t,  $J = 6.1$  Hz, 2H), 2.78 (t,  $J = 6.4$  Hz, 2H), 2.33 (t,  $J = 6.0, 11.9$  Hz, 2H).

$^{13}\text{C}$  NMR (126 MHz,  $\text{CDCl}_3$ )  $\delta$  197.6, 151.0, 142.4, 137.0, 135.5, 134.4, 130.8, 130.2, 129.1, 128.6, 127.7, 127.5, 127.2, 127.1, 126.2, 124.8, 123.4, 123.2, 121.3, 115.1, 113.9, 96.9, 38.9, 30.9, 21.6.

IR (Neat,  $\text{v}/\text{cm}^{-1}$ ) 3101, 3026, 2938, 2882, 2839, 1738, 1641, 1591, 1472, 1449, 1434, 1390, 1347, 1283, 1242, 1187, 1139, 1077, 1057, 1024, 918, 856.

HRMS (ESI)  $m/z$ :  $[\text{M}+\text{H}]^+$  calcd for  $\text{C}_{26}\text{H}_{20}\text{NO}$  362.1540; Found 362.1542.

### 6-methyl-7,8-dihydroindolo[1,2-*f*]phenanthridin-5(6*H*)-one (3z):

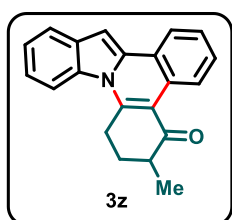

Prepared by following procedure A, obtained as pale yellow solid; (19 mg, Yield = 65%), m.p. 137-138 °C,  $R_f = 0.5$  (ethyl acetate/hexane: 22:78).

$^1\text{H}$  NMR (500 MHz,  $\text{CDCl}_3$ )  $\delta$  9.20 (d,  $J = 8.0$  Hz, 1H), 8.13 (t,  $J = 7.8$  Hz, 2H), 7.82 (d,  $J = 7.7$  Hz, 1H), 7.53 – 7.45 (m, 2H), 7.41 (t,  $J = 7.4$  Hz, 1H), 7.32 (t,  $J = 7.6$  Hz, 1H), 7.28 (s, 1H), 3.85-3.75 (m, 1H), 3.71 – 3.62 (m, 1H), 2.78 – 2.71 (m, 1H), 2.45 – 2.38 (m, 1H), 2.07 – 1.99 (m, 1H), 1.35 (d,  $J = 6.7$  Hz, 3H).

$^{13}\text{C}$  NMR (126 MHz,  $\text{CDCl}_3$ )  $\delta$  200.5, 150.0, 136.4, 133.7, 131.6, 128.4, 127.3, 127.0, 126.2, 124.8, 123.4, 123.2, 121.8, 121.2, 116.3, 113.2, 96.9, 41.7, 29.8, 29.2, 15.9.

IR (Neat,  $\text{v}/\text{cm}^{-1}$ ) 3103, 2952, 2851, 1647, 1559, 1469, 1376, 1332, 1274, 1177, 1076, 995, 901, 840, 763.

HRMS (ESI)  $m/z$ :  $[\text{M}+\text{H}]^+$  calcd for  $\text{C}_{21}\text{H}_{18}\text{NO}$  300.1383; Found 300.1386.

### 7-methyl-7,8-dihydroindolo[1,2-*f*]phenanthridin-5(6*H*)-one (3aa):

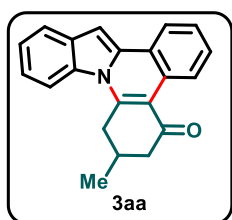

Prepared by following procedure A, obtained as pale yellow solid; (21 mg, Yield = 69%), m.p. 150-151 °C,  $R_f = 0.5$  (ethyl acetate/hexane: 25:75).

$^1\text{H}$  NMR (500 MHz,  $\text{CDCl}_3$ )  $\delta$  9.25 (d,  $J = 8.0$  Hz, 1H), 8.09 (dd,  $J = 10.1, 4.5$  Hz, 2H), 7.81 (d,  $J = 7.8$  Hz, 1H), 7.53 – 7.50 (m, 1H), 7.47 (td,  $J = 7.6, 1.2$  Hz, 1H), 7.41 (t,  $J = 7.4$  Hz, 1H), 7.35 – 7.31 (m, 1H), 7.25 (s, 1H), 3.80 (d,  $J = 12.6$  Hz, 1H), 3.20 (dd,  $J = 16.8, 10.0$  Hz, 1H), 2.79 (dd,  $J = 12.0, 1.4$  Hz, 1H), 2.50 (m, 2H), 1.31 (d,  $J = 6.1$  Hz, 3H).

$^{13}\text{C}$  NMR (126 MHz,  $\text{CDCl}_3$ )  $\delta$  197.8, 150.4, 136.4, 133.7, 131.6, 128.5, 127.4, 126.9, 126.1, 124.6, 123.5, 123.1, 121.8, 121.2, 116.4, 113.3, 97.1, 47.0, 38.8, 28.9, 21.4.

IR (Neat,  $\text{v}/\text{cm}^{-1}$ ) 3034, 2953, 2924, 2860, 1737, 1644, 1592, 1569, 1482, 170, 1452, 1391, 1351, 1340, 1290, 1229, 1217, 1169, 1057, 1057, 1024, 971, 911.

**HRMS (ESI)  $m/z$ :**  $[M+H]^+$  calcd for  $C_{21}H_{18}NO$  300.1383; Found 300.1381.

**7,7-dimethyl-7,8-dihydroindolo[1,2-*f*]phenanthridin-5(6*H*)-one (3ab):**

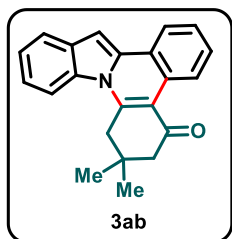

Prepared by following procedure A, obtained as pale yellow solid; (23 mg, Yield = 72%), m.p. 145-146 °C,  $R_f$  = 0.5 (ethyl acetate/hexane: 25:75).

**$^1H$  NMR (500 MHz,  $CDCl_3$ )**  $\delta$  9.28 (d,  $J$  = 8.4 Hz, 1H), 8.09 (d,  $J$  = 8.6 Hz, 2H), 7.81 (d,  $J$  = 7.8 Hz, 1H), 7.54 – 7.50 (m, 1H), 7.49 – 7.46 (m, 1H), 7.42 (t,  $J$  = 7.5 Hz, 1H), 7.34 (dd,  $J$  = 11.4, 4.2 Hz, 1H), 7.24 (s, 1H),

3.49 (s, 2H), 2.62 (s, 2H), 1.24 (s, 7H).

**$^{13}C$  NMR (126 MHz,  $CDCl_3$ )**  $\delta$  197.9, 149.2, 136.6, 133.7, 131.7, 129.2, 128.5, 127.4, 126.9, 125.9, 124.7, 123.5, 123.1, 121.7, 121.2, 116.5, 112.6, 97.1, 52.5, 44.3, 32.5, 28.7.

**IR (Neat,  $v/cm^{-1}$ )** 2970, 2944, 2888, 1721, 1659, 1617, 1597, 1540, 1449, 1425, 1352, 1276, 1216, 1194, 1154, 1135, 1095.

**HRMS (ESI)  $m/z$ :**  $[M+H]^+$  calcd for  $C_{22}H_{20}NO$  314.1540; Found 314.1541.

**7-pentyl-7,8-dihydroindolo[1,2-*f*]phenanthridin-5(6*H*)-one (3ac):**

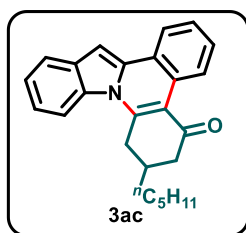

Prepared by following procedure A, obtained as pale yellow solid; (24 mg, Yield = 67%), m.p. 114-115 °C,  $R_f$  = 0.5 (ethyl acetate/hexane: 25:75).

**$^1H$  NMR (500 MHz,  $CDCl_3$ )**  $\delta$  9.25 (d,  $J$  = 8.0 Hz, 1H), 8.10 (d,  $J$  = 8.1 Hz, 2H), 7.81 (d,  $J$  = 7.7 Hz, 1H), 7.51 (t,  $J$  = 8.4 Hz, 1H), 7.47 (t,  $J$  = 8.0

Hz, 1H), 7.41 (t,  $J$  = 7.4 Hz, 1H), 7.33 (t,  $J$  = 8.3 Hz, 1H), 7.26 (s, 1H), 3.83 (dd,  $J$  = 16.8, 3.4 Hz, 1H), 3.21 (dd,  $J$  = 16.8, 10.2 Hz, 1H), 2.83 (dd,  $J$  = 15.7, 2.2 Hz, 1H), 2.48 (dd,  $J$  = 15.6, 12.9 Hz, 1H), 2.37 – 2.28 (m, 1H), 1.66-1.59 (m, 2H), 1.51-1.44 (m, 2H), 1.39-1.32 (m, 4H), 0.92 (t,  $J$  = 6.8 Hz, 3H).

**$^{13}C$  NMR (126 MHz,  $CDCl_3$ )**  $\delta$  197.9, 150.6, 136.4, 133.7, 131.6, 128.5, 127.4, 126.9, 126.1, 124.6, 123.5, 123.1, 121.8, 121.2, 116.3, 113.4, 97.1, 45.3, 37.3, 35.9, 33.7, 31.9, 26.5, 22.7, 14.2.

**IR (Neat,  $v/cm^{-1}$ )** 3125, 3066, 2958, 2923, 2845, 2845, 1652, 1593, 1539, 1471, 1452, 1391, 1336, 1296, 1247, 1198, 1135, 1053, 960, 837.

**HRMS (ESI)  $m/z$ :**  $[M+H]^+$  calcd for  $C_{25}H_{26}NO$  356.2009; Found 356.2010.

### 7-phenyl-7,8-dihydroindolo[1,2-*f*]phenanthridin-5(6*H*)-one (3ae):

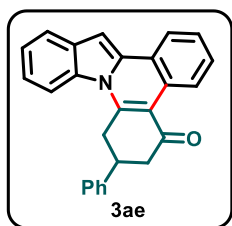

Prepared by following procedure A, obtained as pale yellow solid; (23 mg, Yield = 63%), m.p. 232-233 °C,  $R_f = 0.5$  (ethyl acetate/hexane: 25:75).

$^1\text{H NMR}$  (500 MHz,  $\text{CDCl}_3$ )  $\delta$  9.28 (d,  $J = 8.2$  Hz, 1H), 8.06 (d,  $J = 7.8$  Hz, 1H), 7.94 (d,  $J = 8.6$  Hz, 1H), 7.79 (d,  $J = 7.8$  Hz, 1H), 7.53 (t,  $J = 7.2$  Hz, 1H), 7.47 (dd,  $J = 15.8, 7.9$  Hz, 3H), 7.38 (dd,  $J = 15.0, 7.4$  Hz, 4H),

7.24 (d,  $J = 7.5$  Hz, 1H), 7.21 (s, 1H), 3.99 (d,  $J = 12.5$  Hz, 1H), 3.61 – 3.53 (m, 2H), 3.06 – 2.94 (m, 2H).

$^{13}\text{C NMR}$  (126 MHz,  $\text{CDCl}_3$ )  $\delta$  196.9, 150.1, 142.5, 136.3, 133.6, 131.6, 129.3, 128.5, 127.6, 127.5, 127.0, 127.0, 125.9, 124.6, 123.6, 123.2, 121.9, 121.2, 116.3, 113.3, 97.3, 45.4, 39.6, 38.5.

**IR** (Neat,  $\text{v}/\text{cm}^{-1}$ ) 3027, 3002, 2970, 2945, 1737, 1648, 1634, 1593, 1556, 1481, 1453, 1431, 1371, 1229, 1217, 1144, 1050, 956, 941, 865.

**HRMS** (ESI)  $m/z$ :  $[\text{M}+\text{H}]^+$  calcd for  $\text{C}_{26}\text{H}_{20}\text{NO}$  362.1540; Found 362.1531.

### 7-(*p*-tolyl)-7,8-dihydroindolo[1,2-*f*]phenanthridin-5(6*H*)-one (3af):

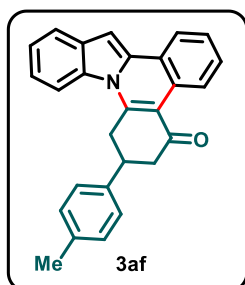

Prepared by following procedure A, obtained as pale yellow solid; (26 mg, Yield = 70%), m.p. 194-196 °C,  $R_f = 0.5$  (ethyl acetate/hexane: 25:75).

$^1\text{H NMR}$  (500 MHz,  $\text{CDCl}_3$ )  $\delta$  9.28 (d,  $J = 8.2$  Hz, 1H), 8.06 (dd,  $J = 7.6, 1.0$  Hz, 1H), 7.94 (d,  $J = 8.6$  Hz, 1H), 7.78 (d,  $J = 7.8$  Hz, 1H), 7.52 (t,  $J = 8.3$  Hz, 1H), 7.47 (t,  $J = 7.9$  Hz, 1H), 7.38 (t,  $J = 7.5$  Hz, 1H), 7.27

(t,  $J = 7.1$  Hz, 3H), 7.24 (m, 2H), 7.21 (s, 1H), 3.98 (d,  $J = 12.7$  Hz, 1H), 3.59 – 3.48 (m, 2H), 3.03 – 2.92 (m, 2H), 2.41 (s, 3H).

$^{13}\text{C NMR}$  (126 MHz,  $\text{CDCl}_3$ )  $\delta$  197.1, 150.2, 139.6, 137.3, 136.4, 133.6, 131.6, 129.9, 128.5, 127.5, 126.9, 126.8, 126.0, 124.6, 123.6, 123.2, 121.9, 121.2, 116.4, 113.3, 97.2, 45.6, 39.2, 38.7, 21.2.

**IR** (Neat,  $\text{v}/\text{cm}^{-1}$ ) 3132, 3019, 2957, 2864, 1737, 1638, 1594, 1556, 1513, 1481, 1454, 1392, 1247, 1198, 1145, 1133, 1053, 943, 922, 867.

**HRMS** (ESI)  $m/z$ :  $[\text{M}+\text{H}]^+$  calcd for  $\text{C}_{27}\text{H}_{22}\text{NO}$  376.1696; Found 376.1691.

**7-(4-methoxyphenyl)-7,8-dihydroindolo[1,2-*f*]phenanthridin-5(6*H*)-one (3ag):**

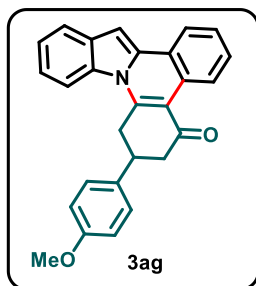

Prepared by following procedure A, obtained as pale yellow solid; (24 mg, Yield = 61%), m.p. 220-221 °C,  $R_f = 0.5$  (ethyl acetate/hexane: 24:76).

**$^1\text{H NMR}$  (500 MHz,  $\text{CDCl}_3$ )**  $\delta$  9.28 (d,  $J = 8.1$  Hz, 1H), 8.09 (d,  $J = 7.7$  Hz, 1H), 7.97 (d,  $J = 8.6$  Hz, 1H), 7.79 (d,  $J = 7.8$  Hz, 1H), 7.53 (t,  $J = 7.6$  Hz, 1H), 7.48 (t,  $J = 7.4$  Hz, 1H), 7.39 (t,  $J = 7.5$  Hz, 1H), 7.31 (d,  $J = 8.4$  Hz, 2H), 7.25 – 7.23 (m, 2H), 6.98 (d,  $J = 8.6$  Hz, 2H), 4.00 (d,  $J = 14.5$  Hz, 1H), 3.85 (s, 3H), 3.61-3.49 (m, 2H), 3.04 – 2.93 (m, 2H).

**$^{13}\text{C NMR}$  (126 MHz,  $\text{CDCl}_3$ )**  $\delta$  197.1, 159.0, 150.2, 136.4, 134.7, 133.6, 131.6, 128.6, 127.9, 127.5, 126.9, 126.0, 124.7, 123.6, 123.2, 121.9, 121.2, 116.3, 114.6, 113.4, 97.3, 55.5, 45.7, 39.0, 38.8.

**IR (Neat,  $\text{v}/\text{cm}^{-1}$ )** 2999, 2973, 2924, 2836, 1738, 1646, 1571, 1530, 1470, 1365, 1229, 1200, 1157, 1141, 1027, 955, 904, 827.

**HRMS (ESI)  $m/z$ :**  $[\text{M}+\text{H}]^+$  calcd for  $\text{C}_{27}\text{H}_{22}\text{NO}_2$  392.1646; Found 392.1639.

**7-(4-isopropylphenyl)-7,8-dihydroindolo[1,2-*f*]phenanthridin-5(6*H*)-one (3ah):**

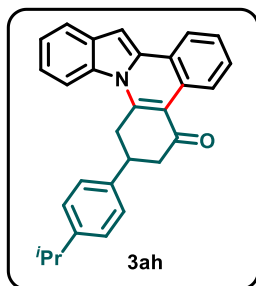

Prepared by following procedure A, obtained as pale yellow solid; (26 mg, Yield = 65%), m.p. 235-236 °C,  $R_f = 0.5$  (ethyl acetate/hexane: 25:75).

**$^1\text{H NMR}$  (500 MHz,  $\text{CDCl}_3$ )**  $\delta$  9.28 (d,  $J = 8.1$  Hz, 1H), 8.07 (d,  $J = 7.5$  Hz, 1H), 7.97 (d,  $J = 8.6$  Hz, 1H), 7.78 (d,  $J = 7.8$  Hz, 1H), 7.52 (t,  $J = 7.6$  Hz, 1H), 7.47 (t,  $J = 7.1$  Hz, 1H), 7.38 (t,  $J = 7.4$  Hz, 1H), 7.30 (s, 3H), 7.26-7.20 (m, 3H), 4.03-3.98 (m, 1H), 3.63 – 3.49 (m, 2H), 3.02 – 2.93 (m, 3H), 1.30 (d,  $J = 6.9$  Hz, 6H).

**$^{13}\text{C NMR}$  (126 MHz,  $\text{CDCl}_3$ )**  $\delta$  197.1, 150.3, 148.2, 139.9, 136.4, 133.6, 131.6, 128.5, 127.5, 127.3, 127.0, 126.9, 126.0, 124.7, 123.6, 123.2, 121.9, 121.2, 116.4, 113.4, 97.3, 45.6, 39.2, 38.6, 33.9, 24.2.

**IR (Neat,  $\text{v}/\text{cm}^{-1}$ )** 3132, 3019, 2957, 2864, 1737, 1638, 1594, 1556, 1513, 1454, 1392, 1352, 1291, 1247, 1198, 1145, 1133, 1053, 957, 943, 922, 867.

**HRMS (ESI)  $m/z$ :**  $[\text{M}+\text{H}]^+$  calcd for  $\text{C}_{29}\text{H}_{26}\text{NO}$  404.2009; Found 404.2006.

### 7-(4-fluorophenyl)-7,8-dihydroindolo[1,2-f]phenanthridin-5(6H)-one (3ai):

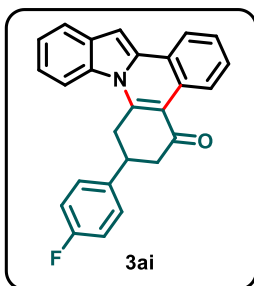

Prepared by following procedure A, obtained as pale yellow solid; (25 mg, Yield = 65%), m.p. 191-192 °C,  $R_f = 0.5$  (ethyl acetate/hexane: 25:75).

$^1\text{H NMR}$  (500 MHz,  $\text{CDCl}_3$ )  $\delta$  9.24 (d,  $J = 8.1$  Hz, 1H), 8.01 (d,  $J = 7.9$  Hz, 1H), 7.88 (d,  $J = 8.6$  Hz, 1H), 7.76 (d,  $J = 7.7$  Hz, 1H), 7.50 (t,  $J = 8.3$  Hz, 1H), 7.45 (t,  $J = 7.9$  Hz, 1H), 7.38 (t,  $J = 7.4$  Hz, 1H), 7.32 (dd,  $J = 8.5, 5.3$  Hz, 2H), 7.25-7.23 (m, 1H), 7.15 (s, 1H), 7.12 (t,  $J = 8.6$  Hz, 2H), 3.95 – 3.88 (m, 1H), 3.54-3.42 (m, 2H), 2.93 (d,  $J = 9.3$  Hz, 2H).

$^{13}\text{C NMR}$  (126 MHz,  $\text{CDCl}_3$ )  $\delta$  196.7, 163.2 (d,  $J = 246.10$  Hz), 150.0, 138.2 (d,  $J = 2.97$  Hz), 136.2, 133.5, 131.6, 128.5 (d,  $J = 3.19$  Hz), 128.5, 127.6, 126.9, 125.8, 124.6, 123.7, 123.2, 122.0, 121.3, 116.2 (d,  $J = 6.70$  Hz), 116.0, 113.3, 97.3, 45.4, 38.8, 38.6.

$^{19}\text{F NMR}$  (470 MHz,  $\text{CDCl}_3$ )  $\delta$  -114.9.

**IR** (Neat,  $\text{v/cm}^{-1}$ ) 3034, 2977, 2970, 2942, 1738, 1642, 1594, 1510, 1482, 1469, 1454, 1388, 1353, 1335, 1224, 1158, 1138, 1053, 943, 835.

**HRMS** (ESI)  $m/z$ :  $[\text{M}+\text{H}]^+$  calcd for  $\text{C}_{26}\text{H}_{19}\text{FNO}$  380.1446; Found 380.1447.

### 7-(4-chlorophenyl)-7,8-dihydroindolo[1,2-f]phenanthridin-5(6H)-one (3aj):

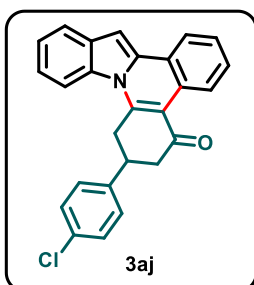

Prepared by following procedure A, obtained as pale yellow solid; (27 mg, Yield = 69%), m.p. 200-201 °C,  $R_f = 0.5$  (ethyl acetate/hexane: 25:75).

$^1\text{H NMR}$  (500 MHz,  $\text{CDCl}_3$ )  $\delta$  9.25 (d,  $J = 8.1$  Hz, 1H), 8.02 (d,  $J = 7.2$  Hz, 1H), 7.88 (d,  $J = 8.6$  Hz, 1H), 7.77 (d,  $J = 7.8$  Hz, 1H), 7.56 (d,  $J = 8.3$  Hz, 2H), 7.51 (dd,  $J = 11.2, 4.1$  Hz, 1H), 7.46 (t,  $J = 7.0$  Hz, 1H),

7.39 (t,  $J = 7.4$  Hz, 3H), 7.25 (d,  $J = 8.3$  Hz, 3H), 7.17 (s, 1H), 3.92 (d,  $J = 12.9$  Hz, 1H), 3.52 – 3.41 (m, 2H), 2.95-2.89 (m, 2H).

$^{13}\text{C NMR}$  (126 MHz,  $\text{CDCl}_3$ )  $\delta$  196.4, 149.8, 141.4, 136.2, 133.5, 132.3, 131.6, 128.7, 128.6, 127.6, 126.9, 125.8, 124.6, 123.7, 123.2, 122.0, 121.4, 121.3, 116.2, 113.3, 97.4, 45.1, 39.0, 38.3.

**IR** (Neat,  $\text{v/cm}^{-1}$ ) 3118, 3058, 3026, 2956, 1737, 1648, 1593, 1469, 1450, 1352, 1319, 1281, 1243, 1143, 1088, 1046, 1013, 957, 827.

**HRMS** (ESI)  $m/z$ :  $[\text{M}+\text{H}]^+$  calcd for  $\text{C}_{26}\text{H}_{19}\text{ClNO}$  396.1150; Found 396.1151.

### 7-(4-bromophenyl)-7,8-dihydroindolo[1,2-*f*]phenanthridin-5(6*H*)-one (3ak):

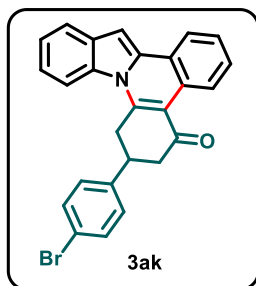

Prepared by following procedure A, obtained as pale yellow solid; (28 mg, Yield = 64%), m.p. 231-232 °C,  $R_f = 0.5$  (ethyl acetate/hexane: 25:75).

$^1\text{H NMR}$  (500 MHz,  $\text{CDCl}_3$ )  $\delta$  9.24 (d,  $J = 8.1$  Hz, 1H), 8.01 (d,  $J = 7.2$  Hz, 1H), 7.87 (d,  $J = 8.6$  Hz, 1H), 7.77 (d,  $J = 7.8$  Hz, 1H), 7.56 (d,  $J = 8.3$  Hz, 1H), 7.50 (t,  $J = 8.2$  Hz, 1H), 7.45 (t,  $J = 7.0$  Hz, 1H), 7.38 (t,  $J = 7.4$  Hz, 1H), 7.25 – 7.23 (m, 3H), 7.16 (s, 1H), 3.94-3.87 (m, 1H), 3.51 – 3.42 (m, 1H), 2.95 – 2.89 (m, 2H).

$^{13}\text{C NMR}$  (126 MHz,  $\text{CDCl}_3$ )  $\delta$  196.4, 149.8, 141.4, 136.2, 133.5, 132.3, 131.6, 128.7, 128.6, 127.6, 126.9, 125.8, 124.6, 123.7, 123.2, 122.0, 121.4, 121.3, 116.2, 113.3, 97.4, 45.1, 39.0, 38.3.

**IR** (Neat,  $\text{v}/\text{cm}^{-1}$ ) 3108, 3026, 2970, 2924, 1738, 1649, 1594, 1469, 1450, 1431, 1353, 1281, 1230, 1216, 1160, 1143, 1071, 957.

**HRMS** (ESI)  $m/z$ :  $[\text{M}+\text{H}]^+$  calcd for  $\text{C}_{26}\text{H}_{19}\text{BrNO}$  440.0645; Found 440.0637.

## 5. General procedure for product 4:

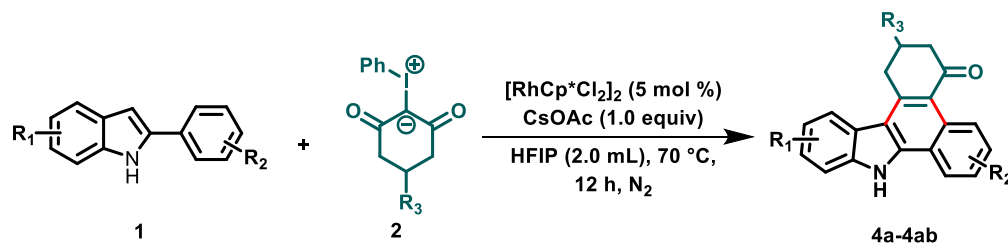

**General procedure B:** In a 10 mL oven dried reaction tube with a magnetic stir bar was charged with 2-phenylindole derivatives **1** (0.11 mmol, 1.1 equiv), Iodonium ylide **2** (0.10 mmol, 1.0 equiv),  $[\text{RhCp}^*\text{Cl}_2]_2$  (5 mol %) and CsOAc (1.0 equiv) in 2 mL of HFIP under  $\text{N}_2$  atmosphere. Then the tube was capped with septa and the resulting mixture was stirred at 70 °C on oil bath for 12 h. The reaction completion was monitored by TLC. Upon completion of reaction, the solvent was evaporated under reduced pressure and the crude product was directly purified by a silica gel column chromatography by using ethyl acetate/hexane as the eluent to afford the corresponding product **4**.

### 1,2,3,9-tetrahydro-4*H*-dibenzo[*a,c*]carbazol-4-one (4a):

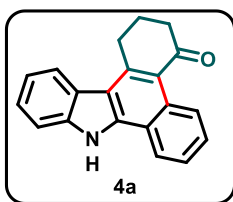

Prepared by following procedure B and obtained as pale yellow solid; (19 mg, Yield = 68%), m.p. 235-236 °C,  $R_f = 0.5$  (ethyl acetate/hexane: 24:76).

$^1\text{H NMR}$  (500 MHz,  $\text{CDCl}_3$ )  $\delta$  9.68 (d,  $J = 8.7$  Hz, 1H), 9.13 (s, 1H), 8.24 (d,  $J = 8.0$  Hz, 1H), 8.11 (d,  $J = 8.1$  Hz, 1H), 7.68 (ddd,  $J = 8.5, 6.9, 1.3$  Hz, 1H), 7.64 (d,  $J = 8.1$  Hz, 1H), 7.60 (t,  $J = 7.5$  Hz, 1H), 7.49 (t,  $J = 8.1$  Hz, 1H), 7.37 (t,  $J = 8.0$  Hz, 1H), 3.70 (t,  $J = 6.1$  Hz, H), 2.87 (t,  $J = 6.7$  Hz, 2H), 2.35 (p,  $J = 6.4, 12.9$  Hz, 1H).

$^{13}\text{C NMR}$  (126 MHz,  $\text{CDCl}_3$ )  $\delta$  199.8, 145.6, 139.6, 139.1, 130.8, 128.1, 127.7, 125.3, 124.7, 124.6, 122.3, 121.5, 120.6, 120.5 (2C), 115.6, 111.8, 40.8, 29.5, 22.6.

**IR** (Neat,  $\text{v}/\text{cm}^{-1}$ ) 3257, 2922, 2850, 1627, 1550, 1507, 1457, 1430, 1378, 1339, 1251, 1180, 1124, 1111, 1038, 1019, 979, 850.

**HRMS** (ESI)  $m/z$ :  $[\text{M}+\text{H}]^+$  calcd for  $\text{C}_{20}\text{H}_{16}\text{NO}$  286.1227; Found 286.1225.

### 6-methyl-1,2,3,9-tetrahydro-4*H*-dibenzo[*a,c*]carbazol-4-one (4b):

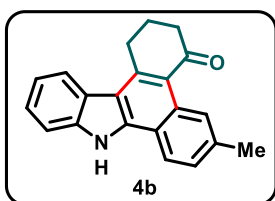

Prepared by following procedure B obtained as pale yellow solid; (16 mg, Yield = 53%), m.p. 175-176 °C,  $R_f = 0.5$  (ethyl acetate/hexane: 25:75).

$^1\text{H NMR}$  (500 MHz,  $\text{CDCl}_3$ )  $\delta$  9.49 (s, 1H), 9.04 (s, 1H), 8.24 (d,  $J = 7.9$  Hz, 1H), 8.02 (d,  $J = 8.3$  Hz, 1H), 7.62 (d,  $J = 8.1$  Hz, 1H), 7.49 – 7.43 (m, 2H), 7.38 – 7.34 (m, 1H), 3.72 (t,  $J = 6.2$  Hz, 2H), 2.87 (t,  $J = 6.5$  Hz, 2H), 2.61 (s, 3H), 2.35 (p,  $J = 6.3, 12.9$  Hz, 2H).

$^{13}\text{C NMR}$  (126 MHz,  $\text{CDCl}_3$ )  $\delta$  199.9, 145.6, 139.5, 139.2, 137.8, 131.2, 127.6, 127.2, 124.7, 124.7, 122.3, 121.2, 120.6, 120.4, 118.5, 115.2, 111.7, 40.9, 29.6, 22.7, 22.5.

**IR** (Neat,  $\text{v}/\text{cm}^{-1}$ ) 3288, 2922, 2852, 1718, 1675, 1589, 1487, 1449, 1369, 1284, 1260, 154, 1078, 1020, 991, 889.

**HRMS** (ESI)  $m/z$ :  $[\text{M}+\text{H}]^+$  calcd for  $\text{C}_{21}\text{H}_{18}\text{NO}$  300.1383; Found 300.1379.

### 6-ethyl-1,2,3,9-tetrahydro-4*H*-dibenzo[*a,c*]carbazol-4-one (4c):

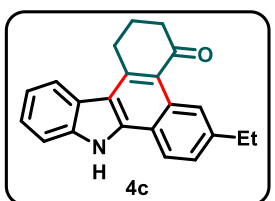

Prepared by following procedure B obtained as pale yellow solid; (18 mg, Yield = 58%), m.p. 245-246 °C,  $R_f = 0.5$  (ethyl acetate/hexane: 30:70).

$^1\text{H NMR}$  (500 MHz,  $\text{DMSO}-d_6$ )  $\delta$  12.60 (s, 1H), 9.43 (s, 1H), 8.47 (d,  $J = 8.3$  Hz, 1H), 8.23 (d,  $J = 8.0$  Hz, 1H), 7.68 (d,  $J = 8.0$  Hz, 1H), 7.53 (d,  $J = 7.8$  Hz, 1H),

7.46 (t,  $J = 7.5$  Hz, 1H), 7.30 (t,  $J = 7.5$  Hz, 1H), 3.67 (t,  $J = 5.9$  Hz, 2H), 2.82 (q,  $J = 7.5$  Hz, 2H), 2.74 (t,  $J = 6.2$  Hz, 2H), 2.23 (p,  $J = 6.4, 12.6$  Hz, 2H), 1.30 (t,  $J = 7.6$  Hz, 3H).

$^{13}\text{C}$  NMR (126 MHz, DMSO- $d_6$ )  $\delta$  198.8, 145.6, 143.1, 139.4, 138.7, 130.5, 125.9, 125.5, 124.7, 123.8, 122.2, 122.0, 120.4, 119.2, 118.5, 114.4, 111.8, 40.4, 29.1, 28.9, 22.2, 15.8.

IR (Neat,  $\text{v}/\text{cm}^{-1}$ ) 3185, 3160, 2961, 2927, 2868, 1623, 1617, 1554, 1545, 1457, 1429, 1355, 1329, 1283, 1254, 1189, 1139, 1059, 1019, 903, 880.

HRMS (ESI)  $m/z$ :  $[\text{M}+\text{H}]^+$  calcd for  $\text{C}_{22}\text{H}_{20}\text{NO}$  314.1540; Found 314.1533.

#### 6-(*tert*-butyl)-1,2,3,9-tetrahydro-4*H*-dibenzo[*a,c*]carbazol-4-one (4d):

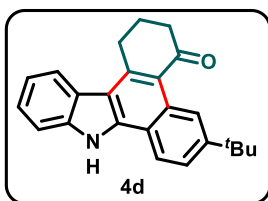

Prepared by following procedure B obtained as pale yellow solid; (22 mg, Yield = 65%), m.p. 135-136 °C,  $R_f = 0.5$  (ethyl acetate/hexane: 30:70).

$^1\text{H}$  NMR (500 MHz,  $\text{CDCl}_3$ )  $\delta$  9.79 (d,  $J = 1.1$  Hz, 1H), 9.15 (s, 1H), 8.21 (d,  $J = 8.0$  Hz, 1H), 8.03 (d,  $J = 8.6$  Hz, 1H), 7.67 (dd,  $J = 8.5, 1.4$  Hz, 1H), 7.61 (d,  $J = 8.0$  Hz, 1H), 7.47 (t,  $J = 7.5$  Hz, 1H), 7.36 (t,  $J = 7.5$  Hz, 1H), 3.66 (t,  $J = 6.1$  Hz, 2H), 2.87 (t,  $J = 6.4$  Hz, 2H), 2.33 (p,  $J = 12.5, 6.2$  Hz, 2H), 1.48 (s, 9H).

$^{13}\text{C}$  NMR (126 MHz,  $\text{CDCl}_3$ )  $\delta$  200.4, 151.0, 145.6, 139.0 (2C), 138.5, 131.0, 124.9, 124.8, 124.1, 122.5, 121.0, 120.0, 120.3, 118.1, 115.5, 111.6, 40.9, 35.6, 31.6, 29.5, 22.6.

IR (Neat,  $\text{v}/\text{cm}^{-1}$ ) 3244, 2947, 2862, 1624, 1599, 1554, 1506, 1436, 1355, 1249, 1181, 1124, 1005, 843, 795.

HRMS (ESI)  $m/z$ :  $[\text{M}+\text{H}]^+$  calcd for  $\text{C}_{24}\text{H}_{24}\text{NO}$  342.1853; Found 342.1849.

#### 6-methoxy-1,2,3,9-tetrahydro-4*H*-dibenzo[*a,c*]carbazol-4-one (4e):

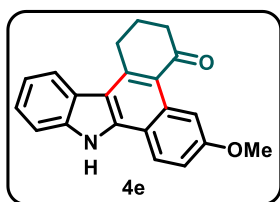

Prepared by following procedure B obtained as pale yellow solid; (18 mg, Yield = 59%), m.p. 234-235 °C,  $R_f = 0.5$  (ethyl acetate/hexane: 22:78).

$^1\text{H}$  NMR (500 MHz,  $\text{CDCl}_3$ )  $\delta$  9.35 (d,  $J = 2.5$  Hz, 1H), 9.01 (s, 1H), 8.21 (d,  $J = 8.0$  Hz, 1H), 8.01 (d,  $J = 8.9$  Hz, 1H), 7.60 (d,  $J = 8.0$  Hz, 1H), 7.46 (t,  $J = 7.6$  Hz, 1H), 7.35 (t,  $J = 7.6$  Hz, 1H), 7.24 (d,  $J = 2.6$  Hz, 1H), 4.02 (s, 3H), 3.71 (t,  $J = 6.2$  Hz, 2H), 2.87 (t,  $J = 6.5$  Hz, 2H), 2.35 (p,  $J = 6.3, 13.0$  Hz, 2H).

$^{13}\text{C}$  NMR (126 MHz,  $\text{CDCl}_3$ )  $\delta$  200.0, 159.7, 146.4, 139.7, 139.6, 132.8, 124.7, 124.5, 123.0, 122.1, 120.5, 119.5, 116.9, 115.2, 114.5, 111.6, 107.6, 55.4, 40.9, 29.7, 22.6.

IR (Neat,  $\text{v}/\text{cm}^{-1}$ ) 3291, 3139, 3066, 2990, 2930, 2850, 1734, 1617, 1550, 1507, 1456, 1429, 1375, 1329, 1297, 1246, 1183, 1167, 1066, 1033, 895.



**HRMS (ESI)  $m/z$  calc. for  $C_{21}H_{18}NO_2$   $[M+H]^+$  316.1333; Found 316.1332.**

**6-fluoro-1,2,3,9-tetrahydro-4H-dibenzo[*a,c*]carbazol-4-one (4f):**

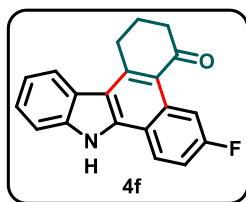

Prepared by following procedure B obtained as pale yellow solid; (14 mg, Yield = 45%), m.p. 291-292 °C,  $R_f$  = 0.5 (ethyl acetate/hexane: 25:75).

**$^1H$  NMR (500 MHz,  $CDCl_3$ )**  $\delta$  9.52 (dd,  $J$  = 13.5, 2.6 Hz, 1H), 9.06 (s, 1H), 8.25 (d,  $J$  = 8.2 Hz, 1H), 8.11 (dd,  $J$  = 9.0, 5.8 Hz, 1H), 7.64 (d,  $J$  = 8.0 Hz, 1H), 7.50 (t,  $J$  = 7.6 Hz, 1H), 7.42 – 7.36 (m, 2H), 3.74 (t,  $J$  = 6.1 Hz, 2H), 2.87 (t,  $J$  = 6.3 Hz, 2H), 2.37 (p,  $J$  = 6.3, 12.9 Hz, 2H).

**$^{13}C$  NMR (126 MHz,  $DMSO-d_6$ )**  $\delta$  194.9, 157.7 (d,  $J$  = 241.67 Hz), 143.2, 135.4, 134.6, 127.5 (d,  $J$  = 10.70 Hz), 121.1, 120.7 (d,  $J$  = 9.66 Hz), 119.7, 118.4, 116.7, 114.6 (d,  $J$  = 4.46 Hz), 113.3, 110.8, 110.8, 110.6, 108.0, 107.6 (d,  $J$  = 25.03 Hz), 36.2, 25.0, 18.1.

**$^{19}F$  NMR (470 MHz,  $CDCl_3$ )**  $\delta$  -110.9.

**IR (Neat,  $\nu/cm^{-1}$ )** 3297, 3134, 3074, 2955, 2852, 1634, 1623, 1564, 1457, 1436, 1354, 1245, 1220, 1133, 1011, 912.

**HRMS (ESI)  $m/z$ :  $[M+H]^+$  calcd for  $C_{20}H_{15}FNO$  304.1133; Found 304.1136.**

**6-chloro-1,2,3,9-tetrahydro-4H-dibenzo[*a,c*]carbazol-4-one (4g):**

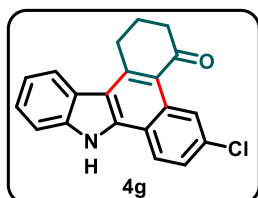

Prepared by following procedure B obtained as pale yellow solid; (15 mg, Yield = 48%), m.p. 273-274 °C,  $R_f$  = 0.5 (ethyl acetate/hexane: 25:75).

**$^1H$  NMR (500 MHz,  $DMSO-d_6$ )**  $\delta$  12.80 (s, 1H), 9.70 (d,  $J$  = 2.1 Hz, 1H), 8.59 (d,  $J$  = 8.8 Hz, 1H), 8.28 (d,  $J$  = 8.0 Hz, 1H), 7.72 (dd,  $J$  = 8.7, 2.1 Hz, 2H), 7.51 (t,  $J$  = 8.0 Hz, 1H), 7.35 (t,  $J$  = 8.0 Hz, 1H), 3.70 (t,  $J$  = 6.1 Hz, 2H), 2.77 (t,  $J$  = 6.3 Hz, 2H), 2.26 (p,  $J$  = 12.6, 6.2 Hz, 2H).

**$^{13}C$  NMR (126 MHz,  $DMSO-d_6$ )**  $\delta$  198.9, 147.1, 139.5, 138.2, 132.6, 130.8, 126.2, 125.6, 125.3, 124.1, 123.6, 122.4, 120.8, 118.6, 118.3, 115.3, 112.0, 40.1, 28.9, 22.0.

**IR (Neat,  $\nu/cm^{-1}$ )** 3284, 3059, 2920, 2850, 16217, 1553, 1503, 1456, 1426, 1339, 1251, 1173, 1128, 1086, 867, 791.

**HRMS (ESI)  $m/z$ :  $[M+H]^+$  calcd for  $C_{20}H_{15}ClNO$  320.0837; Found 320.0841.**

### 6-(trifluoromethyl)-1,2,3,9-tetrahydro-4H-dibenzo[*a,c*]carbazol-4-one (4h):

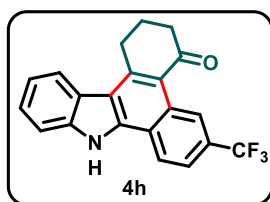

Prepared by following procedure B obtained as pale yellow solid; (14 mg, Yield = 41%), m.p. 255-256 °C,  $R_f = 0.5$  (ethyl acetate/hexane: 35:65).

**Note:** A trace amount of unwanted product was observed with product.

**$^1\text{H}$  NMR (500 MHz, DMSO- $d_6$ )**  $\delta$  12.95 (s, 1H), 10.06 (s, 1H), 8.77 (d,  $J = 8.6$  Hz, 1H), 8.34 (d,  $J = 8.5$  Hz, 1H), 7.97 (d,  $J = 7.7$  Hz, 1H), 7.77 (d,  $J = 8.1$  Hz, 1H), 7.56 (t,  $J = 7.6$  Hz, 1H), 7.39 (t,  $J = 7.5$  Hz, 1H), 3.73 (t,  $J = 6.0$  Hz, 2H), 2.81 (t,  $J = 7.2$  Hz, 2H), 2.29 (p,  $J = 5.8, 12.8$  Hz, 2H).

**$^{13}\text{C}$  NMR (126 MHz, DMSO- $d_6$ )**  $\delta$  199.1, 147.1, 139.6, 137.5, 130.1, 128.9, 127.1, 125.9, 125.6, 124.8 (q,  $J = 3.34$  Hz), 124.65 (q,  $J = 230.67$  Hz), 123.4 (d,  $J = 3.24$  Hz), 122.6, 120.9 (d,  $J = 4.90$  Hz), 120.6, 119.2, 116.5, 112.2, 40.1, 28.9, 22.0.

**$^{19}\text{F}$  NMR (470 MHz, DMSO- $d_6$ )**  $\delta$  -60.43.

**IR (Neat,  $\text{v}/\text{cm}^{-1}$ )** 3220, 3194, 3173, 3117, 1622, 1558, 1512, 1456, 1327, 1315, 1289, 1248, 1165, 1117, 1081, 1050, 995, 917.

**HRMS (ESI)  $m/z$ :**  $[\text{M}+\text{H}]^+$  calcd for  $\text{C}_{21}\text{H}_{15}\text{F}_3\text{NO}$  354.1101; Found 354.1097.

### 7-methoxy-1,2,3,9-tetrahydro-4H-dibenzo[*a,c*]carbazol-4-one (4j):

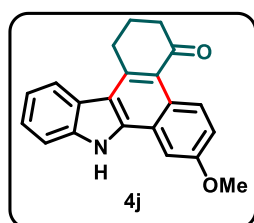

Prepared by following procedure B obtained as pale yellow solid; (18 mg, Yield = 57%), m.p. 152-153 °C,  $R_f = 0.5$  (ethyl acetate/hexane: 20:80).

**$^1\text{H}$  NMR (500 MHz,  $\text{CDCl}_3$ )**  $\delta$  9.59 (d,  $J = 9.5$  Hz, 1H), 9.09 (s, 1H), 8.22 (d,  $J = 8.0$  Hz, 1H), 7.61 (d,  $J = 8.1$  Hz, 1H), 7.48 (t,  $J = 7.6$  Hz, 1H), 7.37 – 7.33 (m, 2H), 7.30 (dd,  $J = 9.5, 2.7$  Hz, 1H), 3.98 (s, 3H), 3.62 (t,  $J = 6.2$  Hz, 2H), 2.84 (t,  $J = 6.4$  Hz, 2H), 2.31 (p,  $J = 12.8, 6.3$  Hz, 2H).

**$^{13}\text{C}$  NMR (126 MHz,  $\text{CDCl}_3$ )**  $\delta$  200.2, 157.3, 143.1, 139.0, 137.8, 130.3, 125.8, 125.2, 124.9, 122.7, 121.4, 121.3, 121.0, 118.5, 116.4, 111.6, 100.7, 55.5, 40.8, 29.3, 22.7.

**IR (Neat,  $\text{v}/\text{cm}^{-1}$ )** 3251, 3074, 2993, 2854, 1622, 1565, 1513, 1469, 1429, 1388, 1354, 1284, 1228, 1178, 1136, 1092, 1001, 960.

**HRMS (ESI)  $m/z$ :**  $[\text{M}+\text{H}]^+$  calcd for  $\text{C}_{21}\text{H}_{18}\text{NO}_2$  316.1333; Found 316.1327.

### 7-bromo-1,2,3,9-tetrahydro-4H-dibenzo[*a,c*]carbazol-4-one (4k):

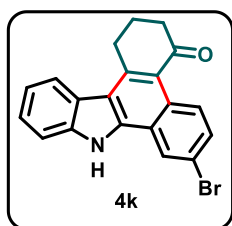

Prepared by following procedure B obtained as pale yellow solid; (15 mg, Yield = 43%), m.p. 289-291 °C,  $R_f = 0.5$  (ethyl acetate/hexane: 25:75).

$^1\text{H NMR}$  (500 MHz,  $\text{DMSO-}d_6$ )  $\delta$  12.76 (s, 1H), 9.52 (d,  $J = 9.2$  Hz, 1H), 8.81 (s, 1H), 8.27 (d,  $J = 7.9$  Hz, 1H), 7.77 (d,  $J = 8.4$  Hz, 1H), 7.71 (d,  $J = 8.0$  Hz, 1H), 7.50 (t,  $J = 7.5$  Hz, 1H), 7.34 (t,  $J = 7.5$  Hz, 1H), 3.67 (t,  $J = 5.3$  Hz, 2H), 2.75 (t,  $J = 5.3$  Hz, 2H), 2.25 (p,  $J = 6.8, 12.3$  Hz, 2H).

$^{13}\text{C NMR}$  (126 MHz,  $\text{DMSO-}d_6$ )  $\delta$  198.8, 146.2, 139.5, 137.2, 130.1, 129.7, 128.6, 125.3, 124.2, 123.5, 122.5, 121.7, 120.7, 119.2, 118.6, 115.8, 112.0, 40.1, 28.9, 22.0.

**IR** (Neat,  $\text{v}/\text{cm}^{-1}$ ) 3315, 3254, 3057, 2936, 1635, 1623, 1581, 1554, 1490, 1426, 1356, 1326, 1255, 1184, 1138, 1081, 107, 979.

**HRMS** (ESI)  $m/z$ :  $[\text{M}+\text{H}]^+$  calcd for  $\text{C}_{20}\text{H}_{15}\text{BrNO}$  364.0332; Found 364.0333.

### 6,7-dichloro-1,2,3,9-tetrahydro-4H-dibenzo[*a,c*]carbazol-4-one (4l):

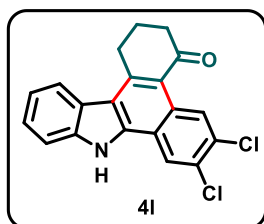

Prepared by following procedure B obtained as pale yellow solid; (13 mg, Yield = 37%), m.p. 283-284 °C,  $R_f = 0.5$  (ethyl acetate/hexane: 25:75).

**Note:** A trace amount of unwanted product was observed with product.

$^1\text{H NMR}$  (500 MHz,  $\text{DMSO-}d_6$ )  $\delta$  12.81 (s, 1H), 9.87 (s, 1H), 8.83 (s, 1H), 8.26 (d,  $J = 8.0$  Hz, 1H), 7.73 (d,  $J = 8.0$  Hz, 1H), 7.53 (t,  $J = 7.6$  Hz, 1H), 7.37 (t,  $J = 7.5$  Hz, 1H), 3.66 (t,  $J = 5.9$  Hz, 2H), 2.76 (t,  $J = 6.4$  Hz, 2H), 2.25 (p,  $J = 11.8, 5.7$  Hz, 2H).

$^{13}\text{C NMR}$  (126 MHz,  $\text{DMSO-}d_6$ )  $\delta$  199.2, 147.8, 139.9, 137.4, 130.6, 129.5, 129.1, 128.3, 126.0, 123.9, 123.8, 123.0, 121.4, 120.3, 118.4, 116.5, 112.6, 40.4, 29.3, 22.3.

**IR** (Neat,  $\text{v}/\text{cm}^{-1}$ ) 3259, 3217, 3196, 3134, 3109, 2971, 2906, 1623, 1617, 1542, 1534, 1452, 1419, 1323, 1251, 1164, 1002, 880, 782, 743.

**HRMS** (ESI)  $m/z$ :  $[\text{M}+\text{H}]^+$  calcd for  $\text{C}_{20}\text{H}_{14}\text{Cl}_2\text{NO}$  354.0447; Found 354.0438.

### 12-methyl-1,2,3,9-tetrahydro-4H-dibenzo[*a,c*]carbazol-4-one (4m):

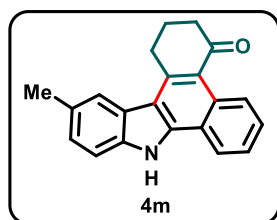

Prepared by following procedure B obtained as pale yellow solid; (16 mg, Yield = 55%), m.p. 204-205 °C,  $R_f = 0.5$  (ethyl acetate/hexane: 25:75).

$^1\text{H NMR}$  (500 MHz,  $\text{CDCl}_3$ )  $\delta$  9.67 (d,  $J = 8.6$  Hz, 1H), 9.02 (s, 1H), 8.09 (d,  $J = 8.3$  Hz, 1H), 8.04 (s, 1H), 7.69-7.65 (m, 1H), 7.62 – 7.57

(m, 1H), 7.53 (d,  $J = 8.3$  Hz, 1H), 7.32 (d,  $J = 9.3$  Hz, 1H), 3.72 (t,  $J = 6.2$  Hz, 2H), 2.87 (t,  $J = 6.7$  Hz, 2H), 2.60 (s, 3H), 2.36 (p,  $J = 12.8, 6.3$  Hz, 2H).

$^{13}\text{C}$  NMR (126 MHz,  $\text{CDCl}_3$ )  $\delta$  200.0, 145.6, 138.5, 137.2, 130.9, 130.6, 128.5, 128.0, 126.6, 125.6, 125.05, 122.6, 121.1, 120.3, 120.2, 115.8, 111.2, 40.9, 29.7, 22.7, 22.0.

IR (Neat,  $\text{v}/\text{cm}^{-1}$ ) 3258, 3111, 2945, 2862, 1627, 1558, 1456, 1379, 1307, 1248, 1140, 1038.

HRMS (ESI)  $m/z$ :  $[\text{M}+\text{H}]^+$  calcd for  $\text{C}_{21}\text{H}_{18}\text{NO}$  300.1383; Found 300.1378.

#### 12-methoxy-1,2,3,9-tetrahydro-4H-dibenzo[*a,c*]carbazol-4-one (4n):

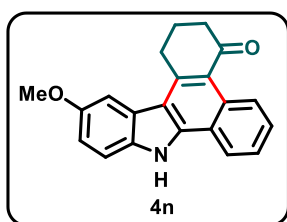

Prepared by following procedure B obtained as pale yellow solid; (19 mg, Yield = 59%), m.p. 192-193 °C,  $R_f = 0.5$  (ethyl acetate/hexane: 25:75).

$^1\text{H}$  NMR (500 MHz,  $\text{CDCl}_3$ )  $\delta$  9.65 (d,  $J = 8.6$  Hz, 1H), 9.08 (s, 1H), 8.07 (d,  $J = 8.0$  Hz, 1H), 7.70 (s, 1H), 7.66 (t,  $J = 7.6$  Hz, 1H), 7.58 (t,  $J = 7.4$  Hz, 1H), 7.52 (d,  $J = 8.7$  Hz, 1H), 7.13 (dd,  $J = 8.7, 1.8$  Hz, 1H), 3.97 (s, 3H), 3.66 (t,  $J = 6.0$  Hz, 2H), 2.86 (t,  $J = 6.5$  Hz, 2H), 2.34 (p,  $J = 12.5, 6.3$  Hz, 2H).

$^{13}\text{C}$  NMR (126 MHz,  $\text{CDCl}_3$ )  $\delta$  199.9, 155.0, 145.6, 139.1, 133.9, 130.9, 128.5, 128.1, 125.7, 125.4, 121.0, 120.3, 120.2, 115.9, 113.8, 112.0, 106.3, 56.4, 40.8, 29.5, 22.6.

IR (Neat,  $\text{v}/\text{cm}^{-1}$ ) 3305, 2954, 2920, 2852, 1709, 1652, 1559, 1512, 1461, 1375, 1264, 1208, 1157, 1109, 1028, 809.

HRMS (ESI)  $m/z$ :  $[\text{M}+\text{H}]^+$  calcd for  $\text{C}_{21}\text{H}_{18}\text{NO}_2$  316.1333; Found 316.1333.

#### 11-chloro-1,2,3,9-tetrahydro-4H-dibenzo[*a,c*]carbazol-4-one (4o):

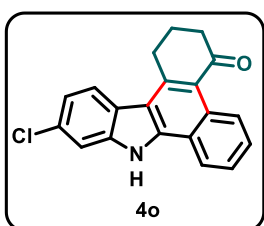

Prepared by following procedure B obtained as pale yellow solid; (17 mg, Yield = 52%), m.p. 267-268 °C,  $R_f = 0.5$  (ethyl acetate/hexane: 25:75).

$^1\text{H}$  NMR (500 MHz,  $\text{DMSO}-d_6$ )  $\delta$  12.78 (s, 1H), 9.58 – 9.49 (m, 1H), 8.52 – 8.48 (m, 1H), 8.21 (d,  $J = 8.5$  Hz, 1H), 7.68 – 7.63 (m, 3H), 7.31 (d,  $J = 8.4$  Hz, 1H), 3.61 (t,  $J = 5.6$  Hz, 2H), 2.74 (t,  $J = 6.5$  Hz, 2H), 2.24 (p,  $J = 6.2, 11.6$  Hz, 2H).

$^{13}\text{C}$  NMR (126 MHz,  $\text{DMSO}-d_6$ )  $\delta$  198.8, 145.2, 140.0, 139.0, 130.2, 129.3, 127.8, 127.3, 125.5, 123.6, 122.5, 121.9, 120.6, 120.1, 119.9, 114.5, 111.4, 40.2, 28.7, 22.1.

IR (Neat,  $\text{v}/\text{cm}^{-1}$ ) 3265, 3226, 3196, 3124, 2949, 1630, 1617, 1558, 1545, 1456, 1355, 1325, 1212, 1179, 1142, 1120, 1066, 1041, 980, 919.

HRMS (ESI)  $m/z$ :  $[\text{M}+\text{H}]^+$  calcd for  $\text{C}_{20}\text{H}_{15}\text{ClNO}$  320.0837; Found 320.0828.

### 3-methyl-1,2,3,9-tetrahydro-4H-dibenzo[*a,c*]carbazol-4-one (4p):

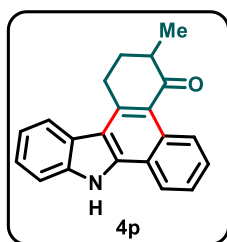

Prepared by following procedure B obtained as pale yellow solid; (17 mg, Yield = 58%), m.p. 221-222 °C,  $R_f = 0.5$  (ethyl acetate/hexane: 20:80).

$^1\text{H NMR}$  (500 MHz,  $\text{CDCl}_3$ )  $\delta$  9.61 (d,  $J = 8.7$  Hz, 1H), 9.11 (s, 1H), 8.21 (d,  $J = 8.0$  Hz, 1H), 8.06 (d,  $J = 8.1$  Hz, 1H), 7.64 (ddd,  $J = 8.6, 6.9, 1.4$  Hz, 1H), 7.61 (d,  $J = 8.1$  Hz, 1H), 7.56 (t,  $J = 8.0$  Hz, 1H), 7.48 (t,  $J = 8.1$  Hz, 1H), 7.36 (t,  $J = 8.0$  Hz, 1H), 3.83 – 3.77 (m, 1H), 3.62 – 3.55 (m, 1H), 2.90 – 2.83 (m, 1H), 2.45-2.39 (m, 1H), 2.13-2.04 (m, 1H), 1.37 (d,  $J = 6.7$  Hz, 3H).

$^{13}\text{C NMR}$  (126 MHz,  $\text{CDCl}_3$ )  $\delta$  203.2, 144.3, 139.0, 138.1, 130.8, 128.2, 127.9, 125.6, 125.6, 124.8, 122.6, 121.1, 121.1, 120.4, 120.1, 115.9, 111.6, 43.3, 30.7, 28.6, 16.1.

**IR** (Neat,  $\text{v/cm}^{-1}$ ) 3331, 2962, 2929, 2867, 2828, 1632, 1558, 1507, 1457, 1338, 1326, 1248, 1163, 1075, 988, 934.

**HRMS** (ESI)  $m/z$ :  $[\text{M}+\text{H}]^+$  calcd for  $\text{C}_{21}\text{H}_{18}\text{NO}$  300.1383; Found 300.1381.

### 2-methyl-1,2,3,9-tetrahydro-4H-dibenzo[*a,c*]carbazol-4-one (4q):

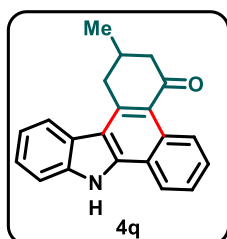

Prepared by following procedure B obtained as pale yellow solid; (19 mg, Yield = 63%), m.p. 168-169 °C,  $R_f = 0.5$  (ethyl acetate/hexane: 25:75).

$^1\text{H NMR}$  (500 MHz,  $\text{DMSO-}d_6$ )  $\delta$  12.67 (s, 1H), 9.59 (dd,  $J = 6.4, 3.4$  Hz, 1H), 8.55 (dd,  $J = 6.2, 3.2$  Hz, 1H), 8.26 (d,  $J = 8.0$  Hz, 1H), 7.70 (d,  $J = 8.0$  Hz, 1H), 7.64 (dd,  $J = 6.4, 3.3$  Hz, 2H), 7.48 (t,  $J = 7.6$  Hz, 1H), 7.33 (t,  $J = 7.5$  Hz, 1H), 3.86 (dd,  $J = 17.0, 3.7$  Hz, 1H), 3.24 (dd,  $J = 17.1, 10.0$  Hz, 1H), 2.72 (dd,  $J = 15.0, 2.6$  Hz, 1H), 2.60 – 2.53 (m, 1H), 2.47 – 2.42 (m, 1H), 1.24 (d,  $J = 6.4$  Hz, 3H).

$^{13}\text{C NMR}$  (126 MHz,  $\text{DMSO-}d_6$ )  $\delta$  198.9, 144.9, 139.4, 138.6, 130.0, 127.5, 127.2, 125.3, 124.8, 123.7, 122.3, 121.9, 120.4, 120.1, 118.9, 114.8, 111.8, 48.2, 36.9, 29.2, 21.1.

**IR** (Neat,  $\text{v/cm}^{-1}$ ) 3109, 2951, 2923, 1653, 1616, 1570, 1507, 1487, 1430, 1339, 1283, 1260, 1138, 1109, 1018, 964.

**HRMS** (ESI)  $m/z$ :  $[\text{M}+\text{H}]^+$  calcd for  $\text{C}_{21}\text{H}_{18}\text{NO}$  300.1383; Found 300.1387.

### 2,2-dimethyl-1,2,3,9-tetrahydro-4H-dibenzo[*a,c*]carbazol-4-one (4r):

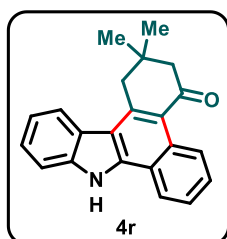

Prepared by following procedure B obtained as pale yellow solid; (18 mg, Yield = 58%), m.p. 171-172 °C,  $R_f = 0.5$  (ethyl acetate/hexane: 25:75).

$^1\text{H NMR}$  (500 MHz,  $\text{CDCl}_3$ )  $\delta$  9.75 (d,  $J = 8.6$  Hz, 1H), 9.27 (s, 1H), 8.25 (d,  $J = 8.0$  Hz, 1H), 8.10 (dd,  $J = 8.1, 0.8$  Hz, 1H), 7.67 (ddd,  $J = 8.6, 6.9,$

1.4 Hz, 1H), 7.62 (d,  $J = 8.1$  Hz, 1H), 7.59 – 7.56 (m, 1H), 7.51 – 7.47 (m, 1H), 7.40 – 7.36 (m, 1H), 3.55 (s, 2H), 2.73 (s, 2H), 1.24 (s, 6H).

$^{13}\text{C}$  NMR (126 MHz,  $\text{CDCl}_3$ )  $\delta$  200.1, 143.7, 139.6, 139.3, 130.5, 127.8, 127.7, 125.2, 124.7, 124.4, 122.4, 121.6, 120.5, 120.4, 119.3, 115.8, 111.8, 54.3, 43.4, 33.1, 28.6.

IR (Neat,  $\text{v}/\text{cm}^{-1}$ ) 3122, 3098, 2957, 2871, 1743, 1684, 1653, 1635, 1575, 1554, 1448, 1369, 1258, 1138, 1071, 999, 930.

HRMS (ESI)  $m/z$ :  $[\text{M}+\text{H}]^+$  calcd for  $\text{C}_{22}\text{H}_{20}\text{NO}$  314.1540; Found 314.1542.

### 2-pentyl-1,2,3,9-tetrahydro-4H-dibenzo[*a,c*]carbazol-4-one (4s):

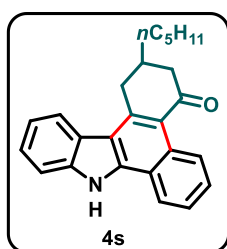

Prepared by following procedure B obtained as pale yellow solid; (22 mg, Yield = 63%), m.p. 215-216 °C,  $R_f = 0.5$  (ethyl acetate/hexane: 25:75).

$^1\text{H}$  NMR (500 MHz,  $\text{DMSO}-d_6$ )  $\delta$  12.68 (s, 1H), 9.57 (s, 1H), 8.54 (s, 1H), 8.23 (d,  $J = 7.8$  Hz, 1H), 7.70 (d,  $J = 7.8$  Hz, 1H), 7.64 (d,  $J = 2.6$  Hz, 2H), 7.48 (t,  $J = 7.3$  Hz, 1H), 7.33 (t,  $J = 7.2$  Hz, 1H), 3.85 (d,  $J = 15.2$  Hz, 1H),

3.25 (dd,  $J = 16.8, 10.2$  Hz, 1H), 2.74 (d,  $J = 14.6$  Hz, 1H), 2.54 (t,  $J = 12.46$  Hz, 1H), 2.29 (s, 1H), 1.64 – 1.42 (m, 4H), 1.31 (s, 4H), 0.87 (t,  $J = 6.0$  Hz, 3H).

$^{13}\text{C}$  NMR (126 MHz,  $\text{DMSO}-d_6$ )  $\delta$  199.4, 145.3, 139.9, 139.1, 130.4, 128.0, 127.6, 125.6, 125.4, 124.2, 122.7, 122.4, 121.0, 120.6, 119.6, 115.3, 112.4, 46.8, 35.7, 35.6, 34.5, 31.9, 26.3, 22.6, 14.5.

IR (Neat,  $\text{v}/\text{cm}^{-1}$ ) 3231, 3190, 3161, 3080, 2953, 2920, 2849, 1631, 1616, 1584, 1559, 1457, 1378, 1339, 1284, 1142, 1019, 953.

HRMS (ESI)  $m/z$ :  $[\text{M}+\text{H}]^+$  calcd for  $\text{C}_{25}\text{H}_{26}\text{NO}$  356.2009; Found 356.2010.

### 2-phenyl-1,2,3,9-tetrahydro-4H-dibenzo[*a,c*]carbazol-4-one (4t):

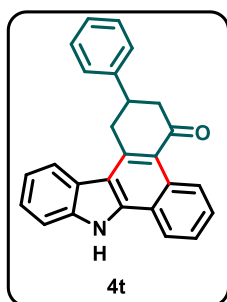

Prepared by following procedure B obtained as pale yellow solid; (20 mg, Yield = 55%), m.p. 157-158 °C,  $R_f = 0.5$  (ethyl acetate/hexane: 25:75).

$^1\text{H}$  NMR (500 MHz,  $\text{CDCl}_3$ )  $\delta$  11.46 (s, 1H), 9.71 (t,  $J = 9.6$  Hz, 1H), 8.43 (t,  $J = 9.5$  Hz, 1H), 8.15 (dd,  $J = 11.4, 8.4$  Hz, 1H), 7.70-7.64 (m, 2H), 7.63 – 7.57 (m, 1H), 7.46 – 7.42 (m, 3H), 7.34 – 7.30 (m, 2H), 7.25 (td,  $J = 12.3, 6.4$  Hz, 2H), 4.22 – 4.12 (m, 1H), 3.74 – 3.62 (m, 2H), 3.16-3.06 (m, 2H).

$^{13}\text{C}$  NMR (126 MHz,  $\text{CDCl}_3$ )  $\delta$  199.0, 144.6, 143.8, 139.6, 139.4, 130.7, 129.5, 128.9, 127.9, 127.8, 126.9, 126.8, 125.4, 124.8, 124.3, 122.3, 121.7, 120.6, 120.5, 115.4, 111.8, 47.3, 40.4, 37.4.

**IR (Neat,  $\nu/\text{cm}^{-1}$ )** 3199, 2917, 2849, 1653, 1610, 1550, 1506, 1457, 1433, 1380, 1340, 1257, 1159, 1047, 1022, 994.

**HRMS (ESI)  $m/z$ :**  $[\text{M}+\text{H}]^+$  calcd for  $\text{C}_{26}\text{H}_{20}\text{NO}$  362.1540; Found 362.1545.

**2-(*p*-tolyl)-1,2,3,9-tetrahydro-4*H*-dibenzo[*a,c*]carbazol-4-one: (4u):**

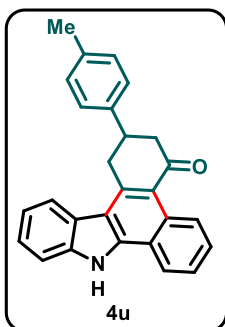

Prepared by following procedure B obtained as pale yellow solid; (19 mg, Yield = 51%), m.p. 276-277 °C,  $R_f$  = 0.5 (ethyl acetate/hexane: 25:75).

**$^1\text{H NMR}$  (500 MHz,  $\text{DMSO-}d_6$ )**  $\delta$  12.70 (s, 1H), 9.66 – 9.59 (m, 1H), 8.59 – 8.53 (m, 1H), 8.07 (d,  $J$  = 8.0 Hz, 1H), 7.70 (d,  $J$  = 8.0 Hz, 1H), 7.68 – 7.64 (m, 2H), 7.45 (t,  $J$  = 7.5 Hz, 1H), 7.35 (d,  $J$  = 7.7 Hz, 2H), 7.25 (t,  $J$  = 7.5 Hz, 1H), 7.17 (d,  $J$  = 7.6 Hz, 2H), 4.00-3.92 (m, 1H), 3.73-3.64 (m, 1H), 3.62-3.53 (m, 1H), 3.14 – 3.06 (m, 1H), 2.82 (d,  $J$  = 13.9 Hz, 1H), 2.29 (s, 3H).

**$^{13}\text{C NMR}$  (126 MHz,  $\text{DMSO-}d_6$ )**  $\delta$  198.2, 144.7, 141.0, 139.4, 138.8, 135.7, 130.0, 129.1, 127.7, 127.2, 126.9, 125.4, 124.9, 123.6, 122.1, 122.0, 120.6, 120.2, 118.9, 114.7, 111.9, 46.9, 39.1, 36.7, 20.7.

**IR (Neat,  $\nu/\text{cm}^{-1}$ )** 3257, 3165, 3121 3010, 2952, 2919, 2891, 1636, 1617, 1559, 1448, 1419, 1378, 1330, 1283, 1252, 1168, 1048, 953, 810.

**HRMS (ESI)  $m/z$ :**  $[\text{M}+\text{H}]^+$  calcd for  $\text{C}_{27}\text{H}_{22}\text{NO}$  376.1696; Found 376.1699.

**2-(4-methoxyphenyl)-1,2,3,9-tetrahydro-4*H*-dibenzo[*a,c*]carbazol-4-one(4v):**

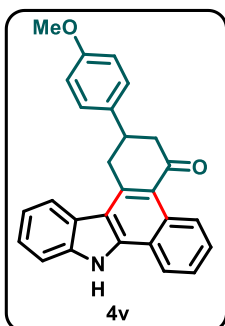

Prepared by following procedure B obtained as pale yellow solid; (19 mg, Yield = 48%), m.p. 226-227 °C,  $R_f$  = 0.5 (ethyl acetate/hexane: 30:70).

**$^1\text{H NMR}$  (500 MHz,  $\text{CDCl}_3$ )**  $\delta$  9.74 (d,  $J$  = 8.6 Hz, 1H), 9.14 (s, 1H), 8.17 (d,  $J$  = 8.1 Hz, 1H), 8.12 (d,  $J$  = 7.9 Hz, 1H), 7.71 (t,  $J$  = 7.4 Hz, 1H), 7.63 (t,  $J$  = 7.9 Hz, 2H), 7.48 (t,  $J$  = 7.5 Hz, 1H), 7.36 (d,  $J$  = 8.6 Hz, 2H), 7.32 (t,  $J$  = 7.6 Hz, 1H), 6.98 (d,  $J$  = 8.6 Hz, 2H), 4.15-4.09 (m, 1H), 3.86 (s, 3H), 3.67 – 3.57 (m, 2H), 3.12 – 3.06 (m, 2H).

**$^{13}\text{C NMR}$  (126 MHz,  $\text{DMSO-}d_6$ )**  $\delta$  198.3, 158.0, 144.9, 139.4, 138.8, 136.1, 130.1, 128.0, 127.7, 127.2, 125.5, 125.0, 123.6, 122.2, 122.0, 120.6, 120.2, 119.0, 114.8, 114.0, 112.0, 55.1, 47.2, 38.7, 36.9.

**IR (Neat,  $\nu/\text{cm}^{-1}$ )** 3299, 3035, 2924, 2888, 2826, 1635, 1619, 1584, 1558, 1456, 1329, 1288, 1249, 1178, 1035, 952, 826.

**HRMS (ESI)  $m/z$ :**  $[\text{M}+\text{H}]^+$  calcd for  $\text{C}_{27}\text{H}_{22}\text{NO}_2$  392.1646; Found 392.1648.

### 2-(4-isopropylphenyl)-1,2,3,9-tetrahydro-4H-dibenzo[*a,c*]carbazol-4-one (4w):

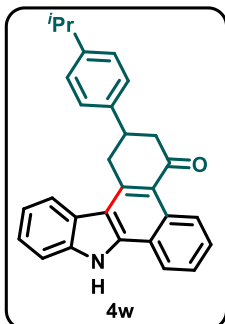

Prepared by following procedure B obtained as pale yellow solid; (23 mg, Yield = 57%), m.p. 192-194 °C,  $R_f$  = 0.5 (ethyl acetate/hexane: 22:78).

**$^1\text{H}$  NMR (500 MHz, DMSO- $d_6$ )**  $\delta$  12.73 (s, 1H), 9.65 (dd,  $J$  = 6.6, 3.2 Hz, 1H), 8.59 (dd,  $J$  = 6.5, 2.9 Hz, 1H), 8.11 (d,  $J$  = 8.0 Hz, 1H), 7.72 (d,  $J$  = 8.1 Hz, 1H), 7.70 – 7.66 (m, 2H), 7.47 (t,  $J$  = 7.6 Hz, 1H), 7.41 (d,  $J$  = 8.0 Hz, 2H), 7.29 (d,  $J$  = 7.6 Hz, 1H), 7.25 (d,  $J$  = 8.0 Hz, 2H), 4.05-3.96 (m, 1H), 3.79-3.70 (m, 1H), 3.65-3.56 (m, 1H), 3.19 – 3.10 (m, 1H), 2.92-2.83

(m, 2H), 1.22 (d,  $J$  = 6.9 Hz, 6H).

**$^{13}\text{C}$  NMR (126 MHz, DMSO- $d_6$ )**  $\delta$  198.2, 146.6, 144.8, 141.4, 139.4, 138.8, 130.1, 127.7, 127.2, 126.9, 126.5, 125.5, 124.9, 123.6, 122.2, 122.0, 120.6, 120.2, 118.9, 114.8, 111.9, 47.0, 39.1, 36.6, 33.1, 24.0.

**IR (Neat,  $\nu/\text{cm}^{-1}$ )** 3216, 3164, 3054, 2955, 2955, 2849, 1632, 1616, 1576, 1559, 1424, 1380, 1340, 1283, 1253, 1181, 1141, 1049, 954.

**HRMS (ESI)  $m/z$ :**  $[\text{M}+\text{H}]^+$  calcd for  $\text{C}_{29}\text{H}_{26}\text{NO}$  404.2009; Found 404.2000.

### 2-(4-fluorophenyl)-1,2,3,9-tetrahydro-4H-dibenzo[*a,c*]carbazol-4-one (4x):

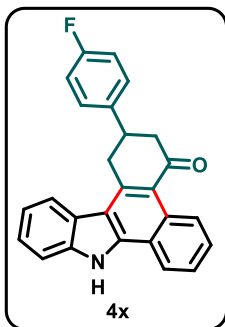

Prepared by following procedure B obtained as pale yellow solid; (13 mg, Yield = 34%), m.p. 160-161 °C,  $R_f$  = 0.5 (ethyl acetate/hexane: 25:75).

**$^1\text{H}$  NMR (500 MHz,  $\text{CDCl}_3$ )**  $\delta$  9.72 (d,  $J$  = 8.7 Hz, 1H), 9.64 (s, 1H), 8.20 (d,  $J$  = 7.9 Hz, 1H), 8.14 (d,  $J$  = 8.0 Hz, 1H), 7.71 (t,  $J$  = 7.3 Hz, 1H), 7.64 (dd,  $J$  = 12.5, 7.6 Hz, 2H), 7.48 (t,  $J$  = 7.4 Hz, 1H), 7.39 (q,  $J$  = 8.6 Hz, 4H), 7.32 (t,  $J$  = 7.7 Hz, 1H), 4.17 – 4.10 (m, 1H), 3.70 – 3.59 (m, 2H), 3.11 – 3.06 (m, 2H).

**$^{13}\text{C}$  NMR (126 MHz,  $\text{CDCl}_3$ )**  $\delta$  198.7, 162.0 (d,  $J$  = 230.84 Hz), 144.4, 139.5 (d,  $J$  = 26.42 Hz), 130.7, 128.4, 128.3, 128.2, 127.9 (d,  $J$  = 2.33 Hz), 126.8, 125.4, 124.8, 124.3, 122.2, 121.6, 120.6 (d,  $J$  = 4.54 Hz), 119.9, 115.7, 115.5, 115.4, 111.8, 47.4, 39.0, 37.5.

**$^{19}\text{F}$  NMR (470 MHz,  $\text{CDCl}_3$ )**  $\delta$  -115.99.

**IR (Neat,  $\nu/\text{cm}^{-1}$ )** 3310, 3055, 2921, 2851, 1700, 1602, 1507, 1457, 1340, 1284, 1201, 1157, 1026, 964, 830.

**HRMS (ESI)  $m/z$ :**  $[\text{M}+\text{H}]^+$  calcd for  $\text{C}_{26}\text{H}_{19}\text{FNO}$  380.1446; Found 380.1444.



### 2-(4-chlorophenyl)-1,2,3,9-tetrahydro-4H-dibenzo[*a,c*]carbazol-4-one (4y):

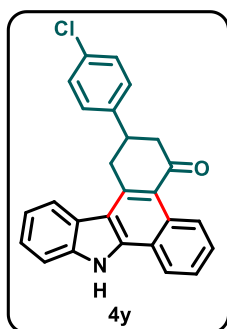

Prepared by following procedure B obtained as pale yellow solid; (17 mg, Yield = 43%), m.p. 175-176 °C,  $R_f$  = 0.5 (ethyl acetate/hexane: 32:68).

$^1\text{H NMR}$  (500 MHz,  $\text{CDCl}_3$ )  $\delta$  9.73 (d,  $J$  = 8.3 Hz, 1H), 9.11 (s, 1H), 8.15 (t,  $J$  = 5.8 Hz, 2H), 7.72 (t,  $J$  = 6.9 Hz, 1H), 7.65 (d,  $J$  = 7.2 Hz, 2H), 7.56 (d,  $J$  = 7.6 Hz, 2H), 7.49 (t,  $J$  = 6.7 Hz, 1H), 7.32 (d,  $J$  = 7.9 Hz, 3H), 4.15-4.09 (m, 1H), 3.67-3.60 (m, 2H), 3.09 (d,  $J$  = 5.0 Hz, 2H).

$^{13}\text{C NMR}$  (126 MHz,  $\text{CDCl}_3$ )  $\delta$  197.8, 144.6, 143.4, 139.4, 138.8, 131.5, 131.3, 130.0, 129.5, 127.6, 127.2, 125.0, 123.6, 122.2, 122.0, 120.2, 119.7, 118.9, 114.7, 112.0, 111.8, 46.5, 38.9, 36.2.

**IR** (Neat,  $\text{v}/\text{cm}^{-1}$ ) 3266, 3063, 2974, 2924, 2851, 1628, 1559, 1507, 1457, 1330, 1283, 1253, 1146, 1073, 1008, 817.

**HRMS** (ESI)  $m/z$ :  $[\text{M}+\text{H}]^+$  calcd for  $\text{C}_{26}\text{H}_{19}\text{ClNO}$  396.1150; Found 396.1146.

### 2-(4-bromophenyl)-1,2,3,9-tetrahydro-4H-dibenzo[*a,c*]carbazol-4-one (4z):

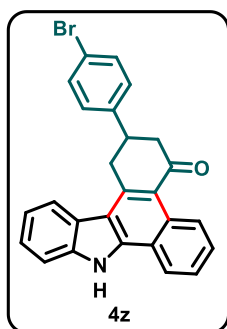

Prepared by following procedure B obtained as pale yellow solid; (20 mg, Yield = 46%), m.p. 161-163 °C,  $R_f$  = 0.5 (ethyl acetate/hexane: 25:75).

$^1\text{H NMR}$  (500 MHz,  $\text{CDCl}_3$ )  $\delta$  10.77 (s, 1H), 9.70 (d,  $J$  = 8.6 Hz, 1H), 8.33 (d,  $J$  = 8.0 Hz, 1H), 8.11 (d,  $J$  = 8.0 Hz, 1H), 7.71-7.62 (m, 2H), 7.60 (t,  $J$  = 7.3 Hz, 1H), 7.44 (t,  $J$  = 7.5 Hz, 1H), 7.39 – 7.34 (m, 3H), 7.31 – 7.24 (m, 2H), 4.16 – 4.08 (m, 1H), 3.68 – 3.59 (m, 2H), 3.12-3.02 (m, 2H).

$^{13}\text{C NMR}$  (126 MHz,  $\text{CDCl}_3$ )  $\delta$  198.6, 144.3, 142.4, 139.5, 139.3, 132.8, 130.8, 129.1, 128.4, 128.1, 128.1, 125.6, 125.1, 124.4, 122.4, 121.4, 120.8, 120.6, 120.1, 115.5, 111.9, 47.2, 40.0, 37.4.

**IR** (Neat,  $\text{v}/\text{cm}^{-1}$ ) 3215, 3055, 2922, 2850, 1684, 1616, 1559, 1507, 1490, 1456, 1330, 1253, 1091, 1012, 818.

**HRMS** (ESI)  $m/z$ :  $[\text{M}+\text{H}]^+$  calcd for  $\text{C}_{26}\text{H}_{19}\text{BrNO}$  440.0645; Found 440.0638.

### 1,3,4,10-tetrahydrobenzo[*a*]cyclohepta[*c*]carbazol-5(2H)-one (4ab):

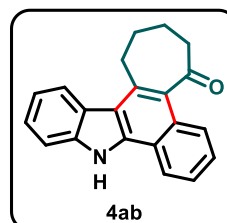

Prepared by following procedure A, obtained as pale yellow solid; (19 mg, Yield = 62%), m.p. 192-193 °C,  $R_f$  = 0.5 (ethyl acetate/hexane: 20:85).

$^1\text{H NMR}$  (500 MHz,  $\text{CDCl}_3$ )  $\delta$  9.08 (s, 1H), 8.34 – 8.30 (m, 1H), 8.28 (d,  $J$  = 8.0 Hz, 1H), 8.12 – 8.09 (m, 1H), 7.63 (d,  $J$  = 8.1 Hz, 1H), 7.56 – 7.52

(m, 2H), 7.47 (t,  $J = 8.0$  Hz, 1H), 7.34 (t,  $J = 8.0$  Hz, 1H), 3.57 (t,  $J = 6.7$  Hz, 2H), 2.82 (t,  $J = 6.0$  Hz, 2H), 2.07 (p,  $J = 13.4, 6.6$  Hz, 2H), 1.84 (p,  $J = 12.6, 6.5$  Hz, 2H).

$^{13}\text{C}$  NMR (126 MHz,  $\text{CDCl}_3$ )  $\delta$  210.8, 139.1, 136.9, 135.3, 128.9, 128.7, 126.9, 126.1, 125.3, 125.1, 124.3, 122.1, 120.7, 120.6, 119.9, 116.0, 111.6, 42.6, 28.5, 23.4, 21.3.

IR (Neat,  $\text{v}/\text{cm}^{-1}$ ) 3343, 3302, 3279, 2921, 2887, 2857, 1631, 1517, 1456, 1330, 1283, 1262, 1154, 1129, 1046, 1018, 975, 934.

HRMS (ESI)  $m/z$ :  $[\text{M}+\text{H}]^+$  calcd for  $\text{C}_{21}\text{H}_{18}\text{NO}$  300.1383; Found 300.1385.

## 7. Synthetic transformations:

### i) Suzuki-Miyaura Coupling:

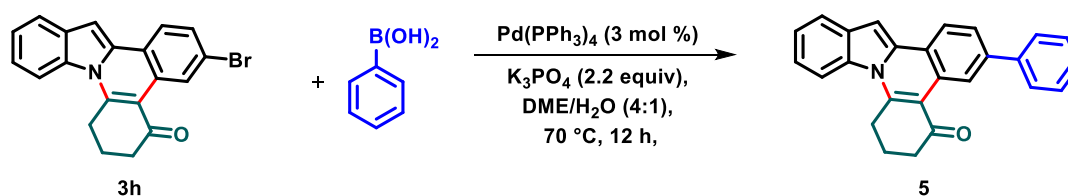

In a oven-dried 10 mL reaction tube,  $\text{Pd}(\text{PPh}_3)_4$  (3 mol %), potassium triphosphate (0.18 mmol, 2.2 equiv) and DME (2 mL) were taken. The solution was degassed with nitrogen for 10 min. After that, compound 3h (0.082 mmol, 1.0 equiv), Phenylboronic acid (0.12 mmol, 1.5 equiv) and water (0.5 mL) was added. Then, the reaction tube was capped with septa and allowed to stir at 70 °C in a pre-heated oil bath for the 12 h. The reaction was monitored by TLC and upon completion of the reaction, the reaction mixture was cooled to room temperature and diluted with water (5 mL) and extracted with ethyl acetate (2 x 10 mL). Further, the combined organic layer was washed with brine (10 mL) and dried over anhydrous  $\text{Na}_2\text{SO}_4$ . The organic layer was concentrated under reduced pressure and the residue was purified by a silica gel column chromatography using ethyl acetate/hexane as the eluent to afford desired product 5.<sup>2</sup>

### 3-phenyl-7,8-dihydroindolo[1,2-f]phenanthridin-5(6H)-one (5):

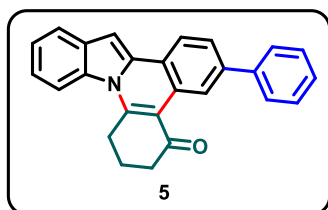

Obtained as pale yellow solid; (23 mg, Yield = 78%), m.p. 192-194 °C,  $R_f = 0.5$  (ethyl acetate/hexane: 20:80).

$^1\text{H}$  NMR (500 MHz,  $\text{CDCl}_3$ )  $\delta$  9.57 (d,  $J = 1.7$  Hz, 1H), 8.13 (d,  $J = 8.3$  Hz, 1H), 8.10 (d,  $J = 8.6$  Hz, 1H), 7.82 (d,  $J = 7.8$  Hz, 1H), 7.77 (d,  $J = 7.2$  Hz, 2H), 7.72 (dd,  $J = 8.3, 1.8$  Hz, 1H), 7.48 (t,  $J = 7.7$  Hz, 2H), 7.42 (t,  $J = 7.4$  Hz, 1H), 7.38 (t,  $J = 7.4$  Hz, 1H), 7.35 – 7.31 (m, 1H), 7.26 (s, 1H), 3.66 (t,  $J = 6.1$  Hz, 2H), 2.76 (t,  $J = 6.3$  Hz, 2H), 2.30 (p,  $J = 12.8, 6.3$  Hz, 2H).

$^{13}\text{C}$  NMR (126 MHz,  $\text{CDCl}_3$ )  $\delta$  197.7, 151.4, 141.1, 140.9, 136.1, 133.8, 131.7, 129.0, 127.6, 127.5, 126.5 (2C), 126.2, 125.5, 123.7, 123.6, 121.8, 121.2, 116.3, 113.6, 97.2, 39.0, 30.8, 21.5.  
IR (Neat,  $\text{v}/\text{cm}^{-1}$ ) 3069, 3029, 2970, 2875, 1737, 1652, 1592, 1565, 1478, 1433, 1389, 1355, 1216, 1174, 1158, 1117, 1025, 986.

HRMS (ESI)  $m/z$ :  $[\text{M}+\text{H}]^+$  calcd for  $\text{C}_{26}\text{H}_{20}\text{NO}$  362.1540; Found 362.1537.

## ii) Heck coupling reaction:

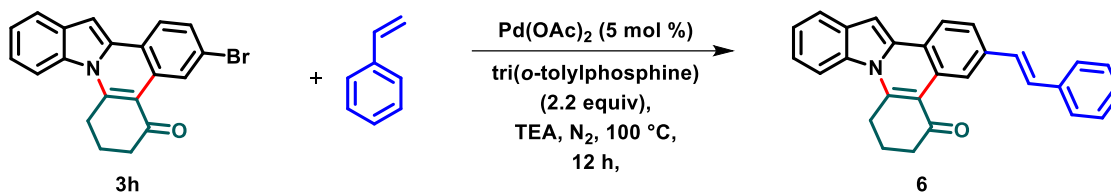

In a oven dried 10 mL reaction tube, **3h** (0.082 mmol, 1.0 equiv),  $\text{Pd}(\text{OAc})_2$  (5 mol %), tri(*o*-tolyl) phosphine (0.016 mmol, 2.2 equiv) and  $\text{Et}_3\text{N}$  (1 mL) were taken. The solution was degassed with nitrogen for 10 min. After that, styrene (0.12 mmol, 1.5 equiv) was added and the reaction tube was capped with septa and allowed to stir at 100 °C in a pre-heated oil bath for the 12 h. The reaction was monitored by TLC and upon completion of the reaction, the mixture was quenched with water (2 mL) and extracted with EtOAc (2 x 10 mL). The combined organic layer was dried over  $\text{Na}_2\text{SO}_4$  and evaporated under reduced pressure. Further, the residue was purified by a silica gel column chromatography using ethyl acetate/hexane (30/70) as the eluent to afford desired product **6**.<sup>2</sup>

### (*E*)-3-styryl-7,8-dihydroindolo[1,2-*f*]phenanthridin-5(6*H*)-one (**6**):

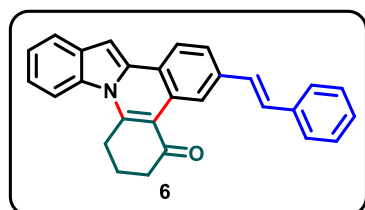

Obtained as pale yellow solid; (20 mg, Yield = 63%), m.p. 192-194 °C,  $R_f$  = 0.5 (ethyl acetate/hexane: 25:75).

$^1\text{H}$  NMR (500 MHz,  $\text{CDCl}_3$ )  $\delta$  9.40 (d,  $J$  = 1.4 Hz, 1H), 8.09 (d,  $J$  = 8.6 Hz, 1H), 8.05 (d,  $J$  = 8.3 Hz, 1H), 7.81 (d,  $J$  = 7.7 Hz, 1H), 7.66 (dd,  $J$  = 8.3, 1.4 Hz, 1H), 7.57 (d,  $J$  = 7.3 Hz, 2H), 7.43-7.37 (m, 3H), 7.34 – 7.28 (m, 2H), 7.25 (bs, 3H), 3.67 (t,  $J$  = 6.0 Hz, 2H), 2.80 – 2.76 (t,  $J$  = 6.8 Hz, 2H), 2.32 (p,  $J$  = 12.6, 6.2 Hz, 2H).

$^{13}\text{C}$  NMR (126 MHz,  $\text{CDCl}_3$ )  $\delta$  197.8, 151.4, 137.5, 137.3, 136.2, 133.8, 131.8, 129.2, 129.1, 128.9, 127.8, 126.8, 126.4, 125.6, 125.1, 123.9, 123.6, 123.5, 121.9, 121.2, 116.3, 113.4, 97.2, 39.0, 30.8, 21.5.

**IR (Neat,  $\nu/\text{cm}^{-1}$ )** 3069, 3029, 2970, 2875, 1737, 1652, 1592, 1565, 1478, , 1433, 1389, 1355, 1216, 1174, 1158, 1117, 1025, 986.

**HRMS (ESI)  $m/z$ :**  $[\text{M}+\text{H}]^+$  calcd for  $\text{C}_{26}\text{H}_{22}\text{NO}$  388.1696; Found 388.1691.

### iii) Alkenylation:

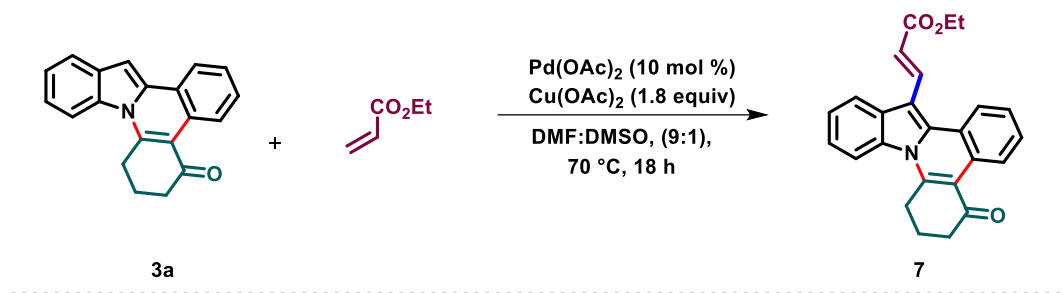

To a solution of **3a** (0.070 mmol, 1.0 equiv),  $\text{Pd}(\text{OAc})_2$  (10 mol %),  $\text{Cu}(\text{OAc})_2$  (0.12 mmol, 1.8 equiv) in 2 mL  $\text{DMF:DMSO}$  (9:1) was added ethyl acrylate (0.070 mmol, 1.0 equiv). Then the contents were stirred at  $70\text{ }^\circ\text{C}$  for 18 h. completion of reaction was checked by TLC. Upon completion of the reaction, the reaction mixture was extracted with ice-cold water and  $\text{EtOAc}$  (2x10 mL) the solvent was evaporated under reduced pressure and the residue was purified by a silica gel column chromatography using ethyl acetate/hexane as the eluent to give compound **7**.<sup>3</sup>

### ethyl (*E*)-3-(5-oxo-5,6,7,8-tetrahydroindolo[1,2-*f*]phenanthridin-14-yl)acrylate (**7**):

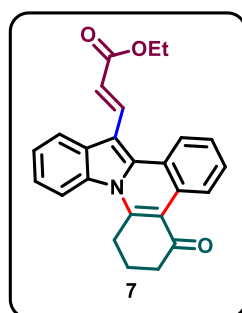

Obtained as yellow solid; (19 mg, Yield = 72%), m.p.  $192\text{--}194\text{ }^\circ\text{C}$ ,  $R_f = 0.5$  (ethyl acetate/hexane: 30:70).

**$^1\text{H NMR}$  (500 MHz,  $\text{CDCl}_3$ )**  $\delta$  9.20 (d,  $J = 8.3$  Hz, 1H), 8.31 (d,  $J = 16.0$  Hz, 1H), 8.12 (d,  $J = 7.9$  Hz, 1H), 8.06 (t,  $J = 7.2$  Hz, 2H), 7.59 – 7.55 (m, 1H), 7.52 (t,  $J = 7.5$  Hz, 1H), 7.46 (t,  $J = 7.6$  Hz, 1H), 7.36 (t,  $J = 7.5$  Hz, 1H), 6.59 (d,  $J = 16.0$  Hz, 1H), 4.37 (q,  $J = 7.1$  Hz, 2H), 3.60 (t,  $J =$

6.0 Hz, 2H), 2.74 (t,  $J = 6.8$  Hz, 2H), 2.27 (p,  $J = 13.6, 6.2$  Hz, 2H), 1.42 (t,  $J = 7.1$  Hz, 3H).

**$^{13}\text{C NMR}$  (126 MHz,  $\text{CDCl}_3$ )**  $\delta$  197.1, 167.8, 150.0, 138.0, 135.1, 133.5, 129.6, 129.2, 127.8, 127.7, 126.6, 126.5, 124.9, 124.4, 123.1, 120.2, 120.0, 116.4, 114.7, 108.6, 60.6, 38.8, 30.9, 21.6, 14.6.

**IR (Neat,  $\nu/\text{cm}^{-1}$ )** 3108, 3060, 2942, 2902, 1701, 1652, 1608, 1596, 1523, 1479, 1454, 1382, 1313, 1272, 1183, 1086.

**HRMS (ESI)  $m/z$ :**  $[\text{M}+\text{H}]^+$  calcd for  $\text{C}_{25}\text{H}_{22}\text{NO}_3$  384.1595; Found 384.1588.

iv) 1,6-conjugate addition of **3a** with *p*-quinone methide:

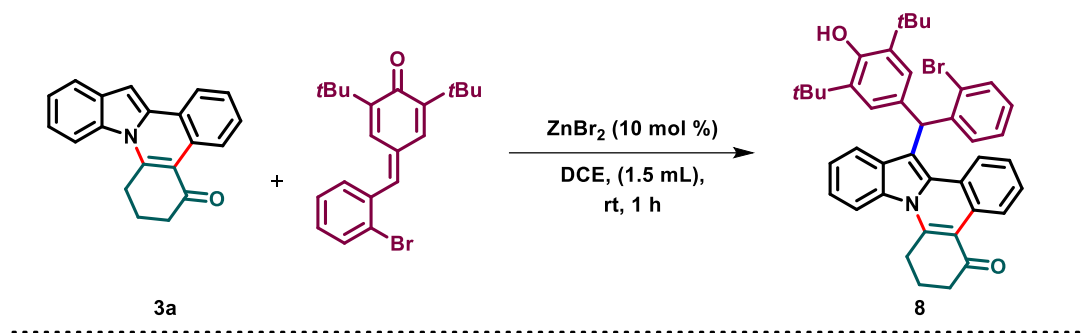

To a solution of **3a** (0.070 mmol, 1.0 equiv), 4-(2-bromobenzylidene)-2,6-di-*tert*-butylcyclohexa-2,5-dien-1-one (0.070 mmol, 1.0 equiv) in 2 mL DCE was added ZnBr<sub>2</sub> (10 mol %). Then the contents were stirred at room temperature for 1 h. Upon completion of the reaction, the solvent was evaporated under reduced pressure and the residue was purified by a silica gel column chromatography using ethyl acetate/hexane as the eluent to give compound **8**.<sup>3</sup>

**14-((2-bromophenyl)(3,5-di-*tert*-butyl-4-hydroxyphenyl)methyl)-7,8-dihydroindolo[1,2-*f*]phenanthridin-5(6*H*)-one (8):**

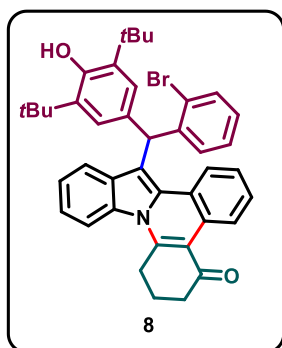

Obtained as light yellow solid; (39 mg, Yield = 85%), m.p. 201-202 °C, R<sub>f</sub> = 0.5 (ethyl acetate/hexane: 25:75).

<sup>1</sup>H NMR (500 MHz, CDCl<sub>3</sub>) δ 9.19 (dd, *J* = 8.3, 1.0 Hz, 1H), 8.13 (d, *J* = 8.7 Hz, 1H), 8.03 (d, *J* = 8.0 Hz, 1H), 7.61 (dd, *J* = 7.9, 1.2 Hz, 1H), 7.52 – 7.48 (m, 1H), 7.38 (t, *J* = 8.3 Hz, 1H), 7.26 – 7.22 (m, 2H), 7.19 (td, *J* = 7.6, 1.2 Hz, 1H), 7.13-7.06 (m, 2H), 7.03 (dd, *J* = 8.1, 0.8 Hz, 1H), 6.89 (s, 2H), 6.53 (s, 1H), 5.09 (s, 1H), 3.74 (t, *J* = 6.1 Hz, 2H), 2.79 (t, *J* = 6.7 Hz, 2H), 2.36 – 2.27 (m, 2H), 1.27 (s, 18H).

<sup>13</sup>C NMR (126 MHz, CDCl<sub>3</sub>) δ 197.2, 152.5, 150.9, 142.8, 135.9, 133.3, 133.1, 133.0, 132.3, 131.8, 131.5, 128.4, 128.1, 127.6, 127.5, 126.8, 126.4 (2C), 126.3, 126.1 (2C), 125.5, 125.4, 122.7, 121.7, 116.1, 114.5, 113.9, 49.3, 38.9, 34.5, 31.4, 30.5, 21.9.

IR (Neat, v/cm<sup>-1</sup>) 3634, 3072, 2954, 2930, 2853, 1713, 1636, 1588, 1515, 1450, 1434, 1394, 1365, 1329, 1289, 1228, 1187, 1115, 1030.

HRMS (ESI) *m/z*: [M+H]<sup>+</sup> calcd for C<sub>41</sub>H<sub>41</sub>BrNO<sub>2</sub> 658.2316; Found 658.2306.

#### v) Reduction reaction:

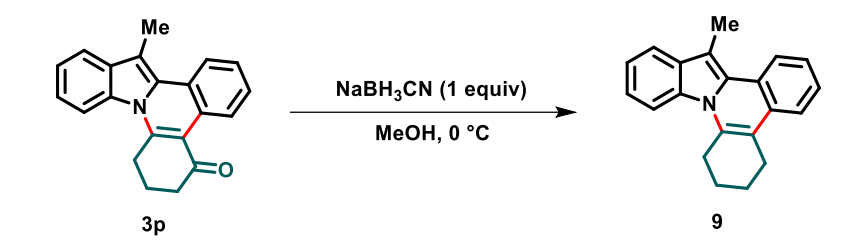

To a solution of **3p** (0.1 mmol, 1.0 equiv), in 2 mL methanol at 0 °C was added portion wise  $\text{NaBH}_3\text{CN}$  (0.1 mmol, 1.0 equiv). Then the contents were stirred at room temperature until the completion of **3p**. Upon completion of the reaction, the reaction mixture quenched with water. Further, the crude material extracted with EtOAc (2 x 10 mL) and combined organic layer was dried over  $\text{Na}_2\text{SO}_4$ . The organic layer was collected and concentrated under reduced pressure, and the residue was purified by a silica gel column chromatography using ethyl acetate/hexane as the eluent to give compound **9**.<sup>2</sup>

#### 14-methyl-5,6,7,8-tetrahydroindolo[1,2-f]phenanthridine (**9**):

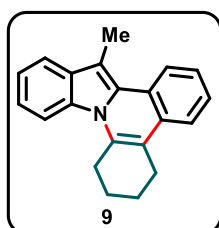

Obtained as light green solid; (23 mg, Yield = 80%), m.p. 192-194 °C,  $R_f$  = 0.5 (ethyl acetate/hexane: 30:70).

$^1\text{H NMR}$  (500 MHz,  $\text{CDCl}_3$ )  $\delta$  8.42 (d,  $J$  = 7.5 Hz, 1H), 8.17 (d,  $J$  = 8.6 Hz, 1H), 7.84 (d,  $J$  = 8.0 Hz, 1H), 7.68 (d,  $J$  = 7.4 Hz, 1H), 7.48 (qd,  $J$  = 7.1, 3.5 Hz, 2H), 7.34 (t,  $J$  = 7.4 Hz, 1H), 7.25-7.22 (m, 1H), 3.41 (bs, 2H),

2.88 (bs, 2H), 2.85 (s, 3H), 2.05 – 1.94 (m, 4H).

$^{13}\text{C NMR}$  (126 MHz,  $\text{CDCl}_3$ )  $\delta$  135.2, 131.4, 130.9, 130.4, 130.4, 126.9, 126.6, 126.0, 124.7, 121.8, 120.7, 120.5, 118.3, 115.5, 112.2, 104.8, 30.3, 25.4, 23.1, 22.2, 12.2.

**IR** (Neat,  $\text{v}/\text{cm}^{-1}$ ) 3062, 3043, 2924, 2854, 1726, 1623, 1599, 1545, 1479, 1382, 1278, 1208, 1122, 1078, 1026.

**HRMS** (ESI)  $m/z$ :  $[\text{M}+\text{H}]^+$  calcd for  $\text{C}_{21}\text{H}_{20}\text{N}$  286.1591; Found 286.1582.

## 8. XRD data

X-ray data for the compounds **3ab** and **4r** were collected at room temperature on a Bruker D8 QUEST instrument with an  $\text{I}\mu\text{S}$  Mo micro source ( $\lambda$  = 0.71073 Å) and a PHOTON-100 detector. The raw data frames were reduced and corrected for absorption effects using the Bruker Apex 3 software suite programs [1]. The structure was solved using intrinsic phasing method [2] and further refined with the SHELXL [2-3] program and expanded using Fourier

techniques. Anisotropic displacement parameters were included for all non-hydrogen atoms. All H atoms were positioned geometrically and treated as riding on their parent C atoms [C-H = 0.93-0.97 Å, and  $U_{\text{iso}}(\text{H}) = 1.5U_{\text{eq}}(\text{C})$  for methyl H or  $1.2U_{\text{eq}}(\text{C})$  for other H atoms].

### Sample Preparation for crystal growth for **3ab**:

In a 5 mL vial, compound **3ab** was dissolved in 3:1 ratio of  $\text{CDCl}_3$  and Hexane solvent (0.6 mL : 0.2 mL). The content kept for the slow evaporation over three days. After three days' pale yellow colour crystals were generated. The generated crystals were collected and send for the X-ray crystallographic analysis.

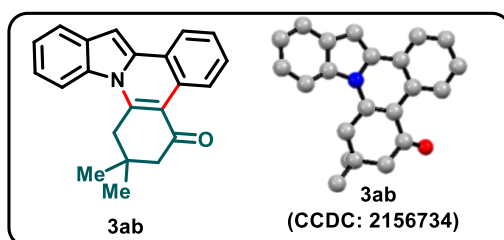

Colour code: Carbon (Light-gray), Oxygen (Red), Nitrogen (Blue)

|                          |                                       |
|--------------------------|---------------------------------------|
| CCDC                     | 2156734                               |
| Formula                  | $\text{C}_{22}\text{H}_{19}\text{NO}$ |
| Formula weight           | 313.4000                              |
| Wavelength               | 0.71073                               |
| Temperature (K)          | 293                                   |
| Crystal system           | Orthorhombic                          |
| Space group              | P b c a                               |
| a (Å)                    | 16.6240 (5)                           |
| b (Å)                    | 9.8728 (3)                            |
| c (Å)                    | 19.5796 (6)                           |
| $\alpha$ (°)             | 90                                    |
| $\beta$ (°)              | 90                                    |
| $\gamma$ (°)             | 90                                    |
| V (cm) <sup>3</sup>      | 3213.51 (17)                          |
| Z                        | 8                                     |
| Density                  | 1.296                                 |
| $\mu$ (mm) <sup>-1</sup> | 0.079                                 |
| F (000)                  | 1328.6                                |
| No. of ref.              | 3391                                  |
| Unique ref.              | 2353                                  |
| R1                       | 0.0452                                |
| wR2                      | 0.1226                                |
| G. O. F.                 | 1.024                                 |

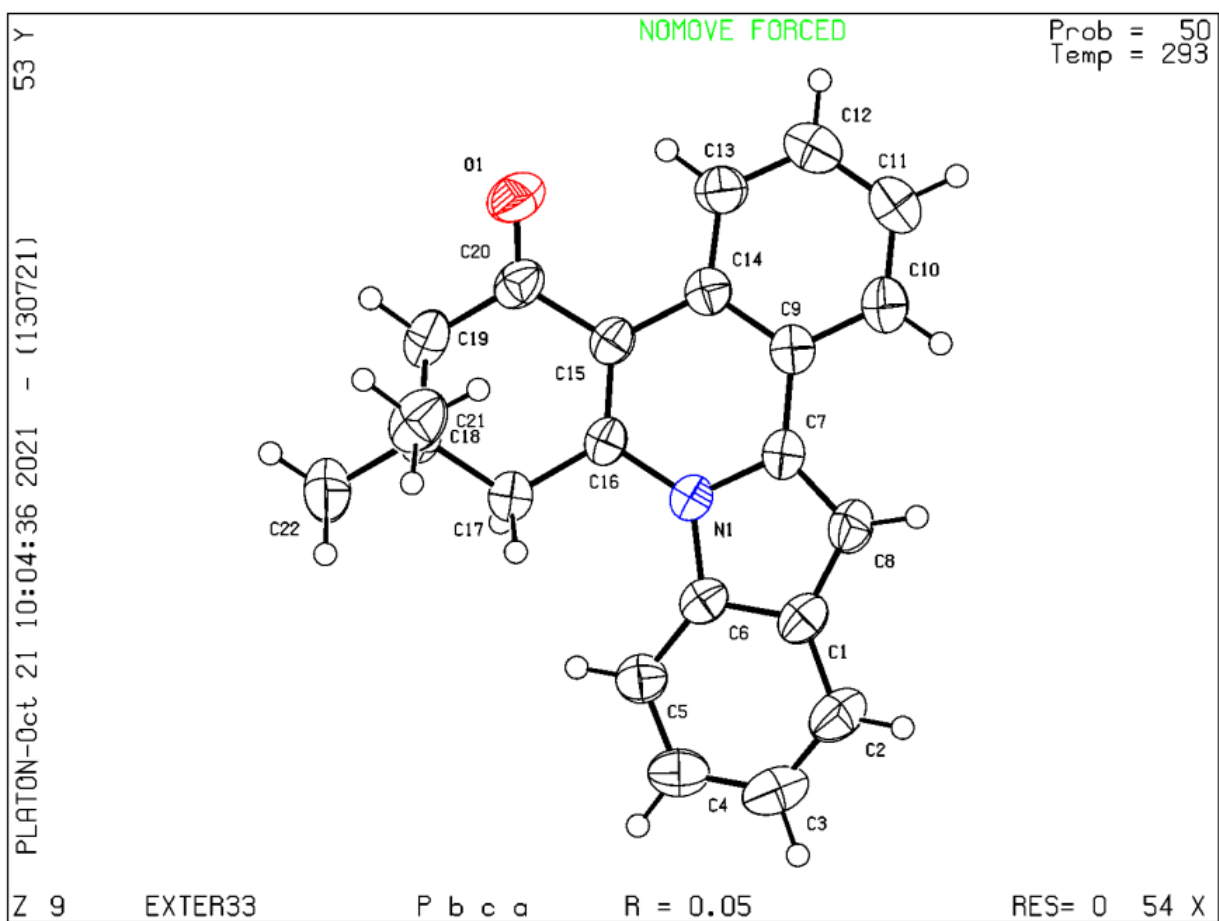

**Fig. 1:** ORTEP drawing of the compound **3ab** showing thermal ellipsoids at the 30% probability level.

Colour code: Carbon (Light-gray), Oxygen (Red), Nitrogen (Blue)



## (b) XRD data of 4r

### Sample Preparation for crystal growth for 4r:

The compound **4r** was dissolved in 3:1 ratio of  $\text{CDCl}_3$  and Hexane solvent (0.6 mL : 0.2 mL). The content kept for the slow evaporation over three days. After three days' crystals were generated. The generated crystals were collected and send for the X-ray crystallographic analysis.

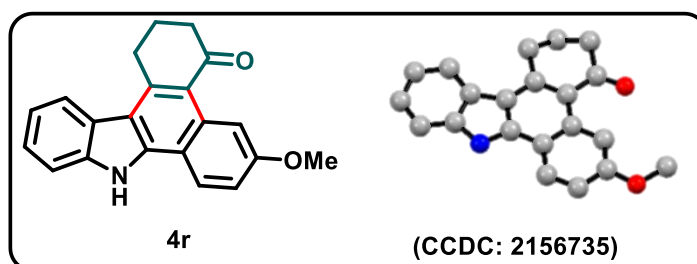

Colour code: Carbon (Light-gray), Nitrogen (Blue), Oxygen (Red)

|                          |                                         |
|--------------------------|-----------------------------------------|
| CCDC                     | 2156735                                 |
| Formula                  | $\text{C}_{21}\text{H}_{17}\text{NO}_2$ |
| Formula weight           | 315.3720                                |
| Wavelength               | 0.71073                                 |
| Temperature (K)          | 296                                     |
| Crystal system           | Monoclinic                              |
| Space group              | $\text{C } 1 \text{ c } 1$              |
| a (Å)                    | 5.1663 (15)                             |
| b (Å)                    | 20.190 (7)                              |
| c (Å)                    | 14.945 (5)                              |
| $\alpha$ (°)             | 90                                      |
| $\beta$ (°)              | 96.836 (13)                             |
| $\gamma$ (°)             | 90                                      |
| V (cm) <sup>3</sup>      | 1547.8 (8)                              |
| Z                        | 4                                       |
| Density                  | 1.353                                   |
| $\mu$ (mm) <sup>-1</sup> | 0.087                                   |
| F (000)                  | 664.0                                   |
| No. of ref.              | 2695                                    |
| Unique ref.              | 2601                                    |
| R1                       | 0.0937                                  |
| wR2                      | 0.1845                                  |
| G. O. F.                 | 1.285                                   |

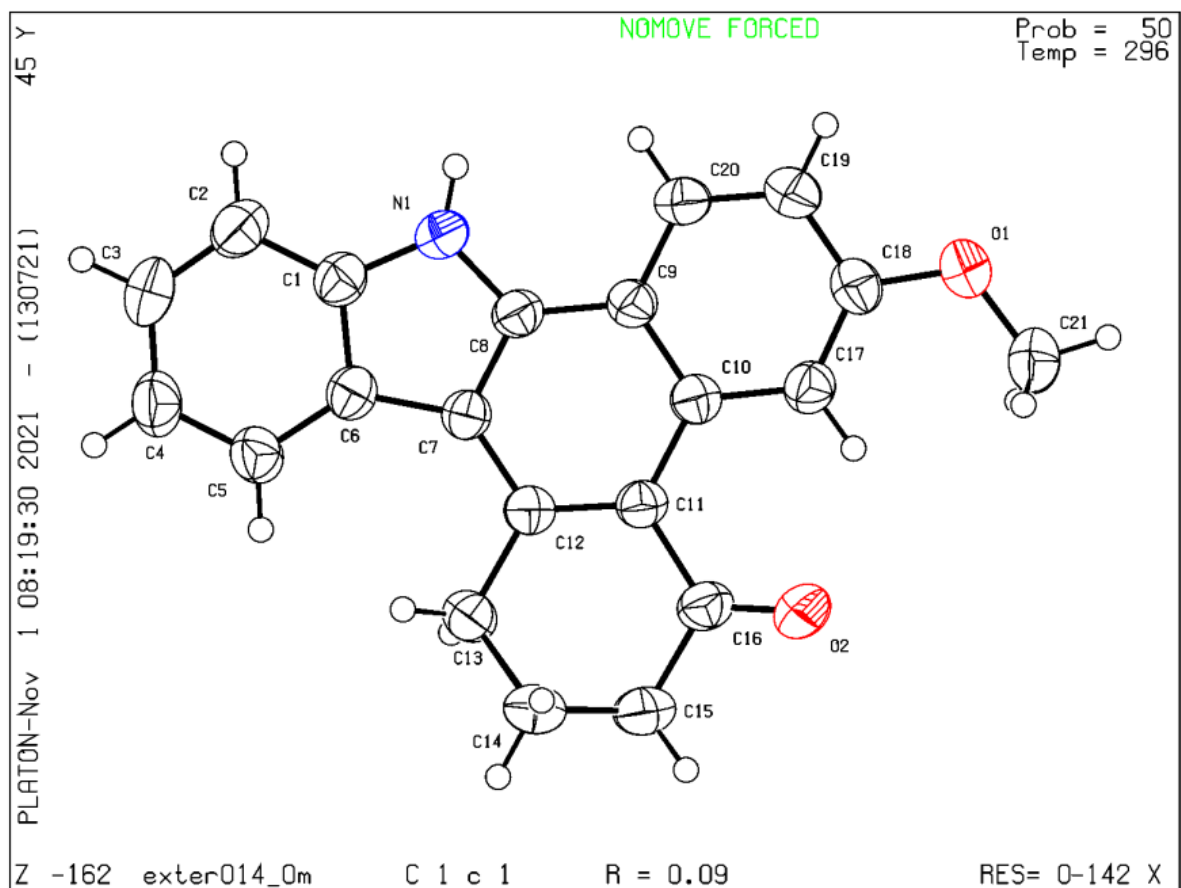

**Fig. 2:** ORTEP drawing of the compound **4r** showing thermal ellipsoids at the 30% probability level.

Colour code: Carbon (Light-gray), Oxygen (Red), Nitrogen (Blue)

## 9. References:

1. (a) Yang, S.D.; Sun, C.L.; Fang, Z.; Li, B.J.; Li, Y.Z.; Shi, Z.J. *Angew. Chem. Int. Ed.* **2008**, *47*, 1473-1476. (b) Mao, J.; Wang, Z.; Xu, X.; Liu, G.; Jiang, R.; Guan, H.; Zheng, Z.; Walsh, P.J. *Angew. Chem. Int. Ed.* **2019**, *58*, 11033-11038. (c) Markandeya, S.V.; Renuka, C.; Lakshmi, P.K.; Rajesh, A.; Sridhar, C.; Babu, K.R. *Synth. Comm.*, **2018**, *48*, 135-145. (d) Xia, X.D.; Xuan, J.; Wang, Q.; Lu, L.Q.; Chen, J.R.; Xiao, W.J. *Adv. Synth. Catal.* **2014**, *356*, 2807-2812. (e) Prior, A.M.; Yu, X.; Park, E.J.; Kondratyuk, T.P.; Lin, Y.; Pezzuto, J.M.; Sun, D. *Bioorg. Med. Chem. Lett.* **2017**, *27*, 5393–5399. (f) Kraus, G.A.; Guo, H.; Kumar, G.; Pollock III, G.; Carruthers, H.; Chaudhary, D.; Beasley, J. *Synthesis*, **2010**, *8*, 1386-1393. (g) Bellezza, D.; Noverges, B.; Fasano, F.; Sarmiento, J.T.; Medio-Simón, M.; Asensio, G. *Eur. J. Org. Chem.* **2019**, 1229-1235. (h) Fu, W.; Yang, K.; Chen, J.; Song, Q. *Org. Biomol. Chem.* **2017**, *15*, 8354-8360.
2. (a) Nunewar, S., Kumar, S., Pandhare, H., Nanduri, S. and Kanchupalli, V., *Org. Lett.* **2021**, *23*, 4233-4238. (b) Kumar, S., Nunewar, S. and Kanchupalli, V., *Asian J. Org. Chem.*, **2022**, *11*, 202100689.
3. Thavaselvan, S. and Parthasarathy, K., *Org. Lett.* **2020**, *22*, 3810-3814.

## 10. NMR data:

### 7,8-dihydroindolo[1,2-f]phenanthridin-5(6H)-one (3a):

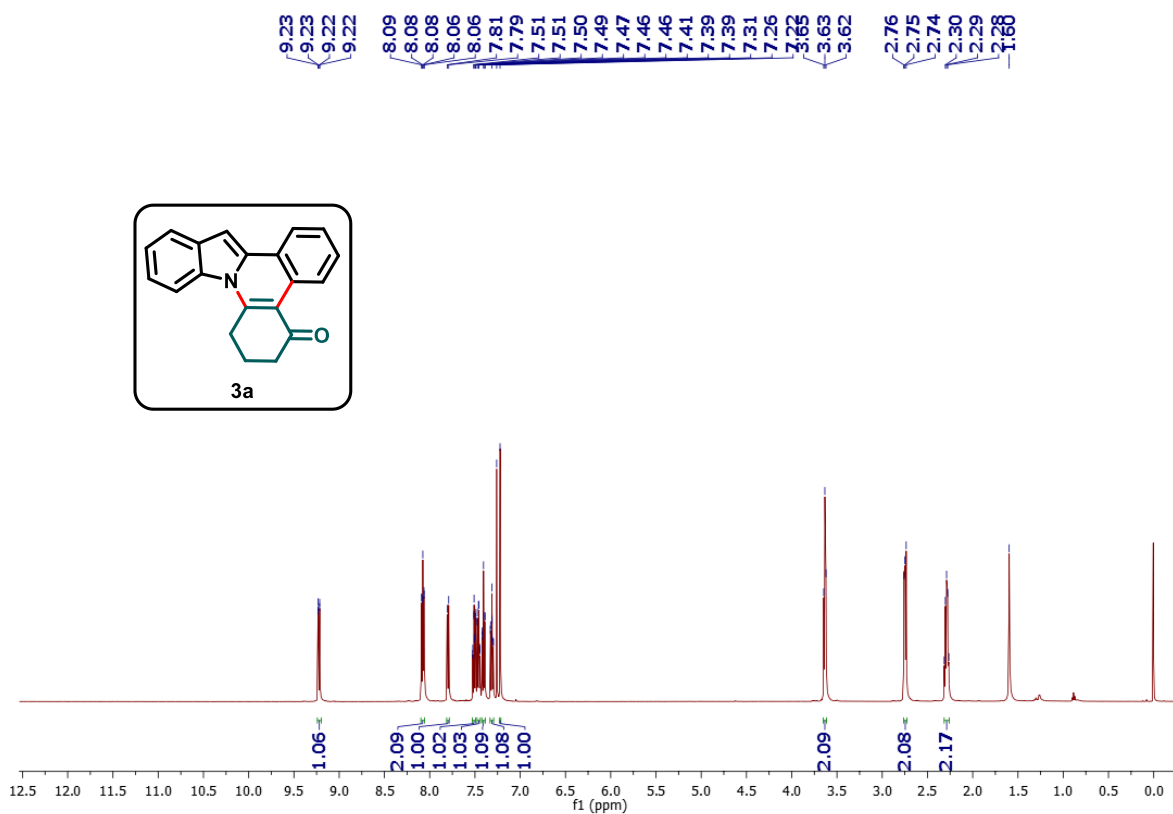

<sup>1</sup>H NMR of compound 3a (500 MHz, CDCl<sub>3</sub>)

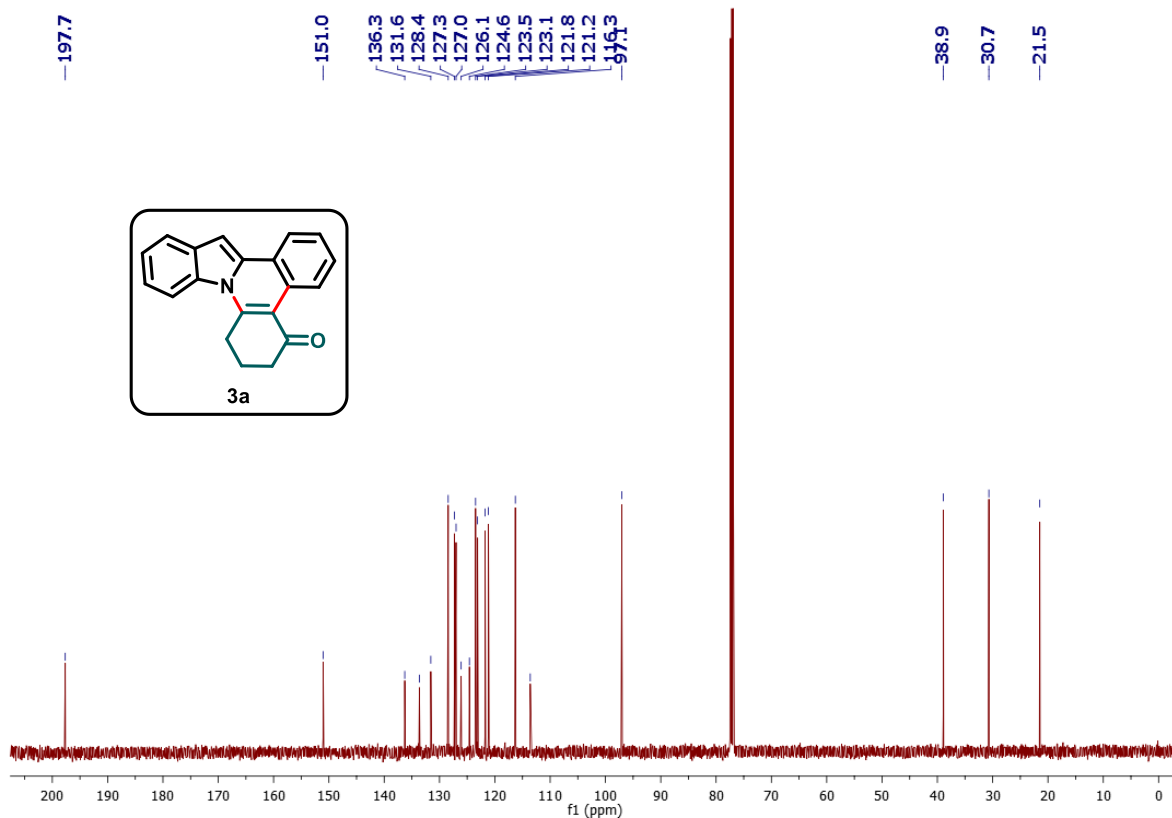

<sup>13</sup>C NMR of compound 3a (126 MHz, CDCl<sub>3</sub>)

**3-methyl-7,8-dihydroindolo[1,2-*f*]phenanthridin-5(6*H*)-one (3b):**

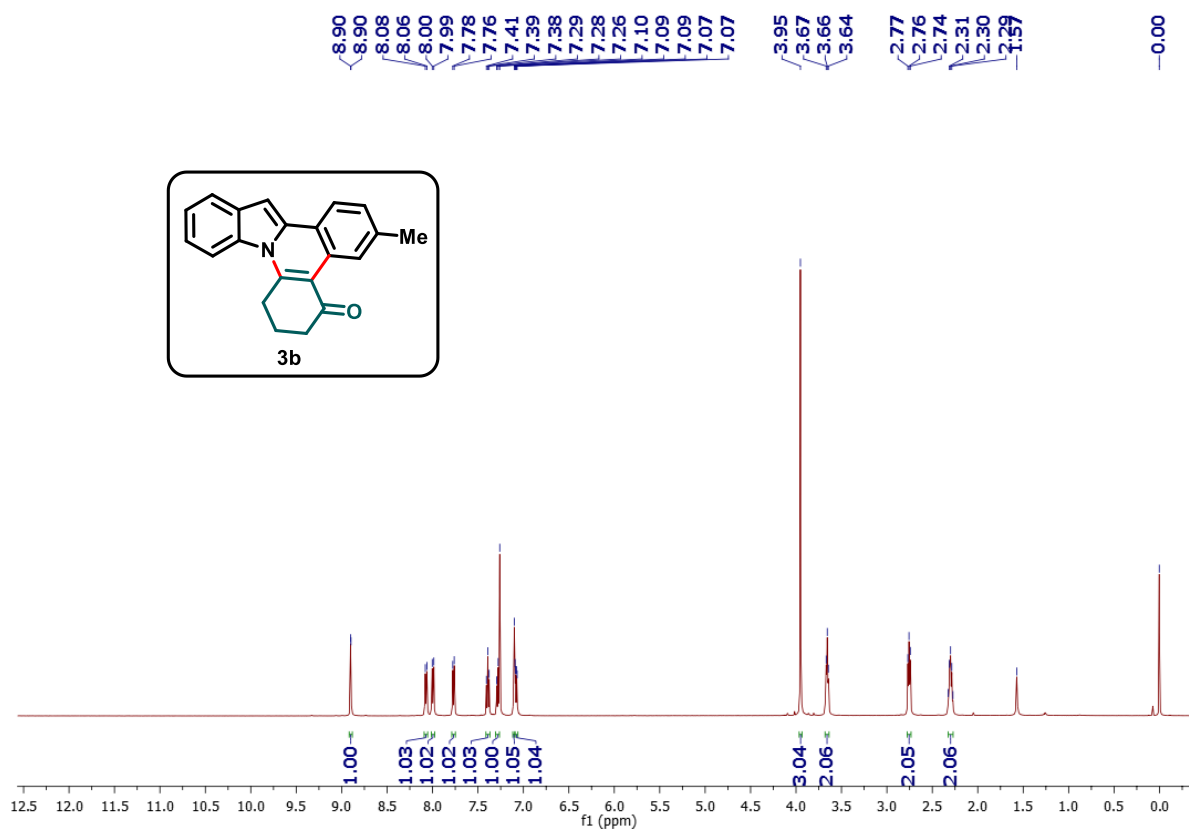

<sup>1</sup>H NMR of compound **3b** (500 MHz, CDCl<sub>3</sub>)

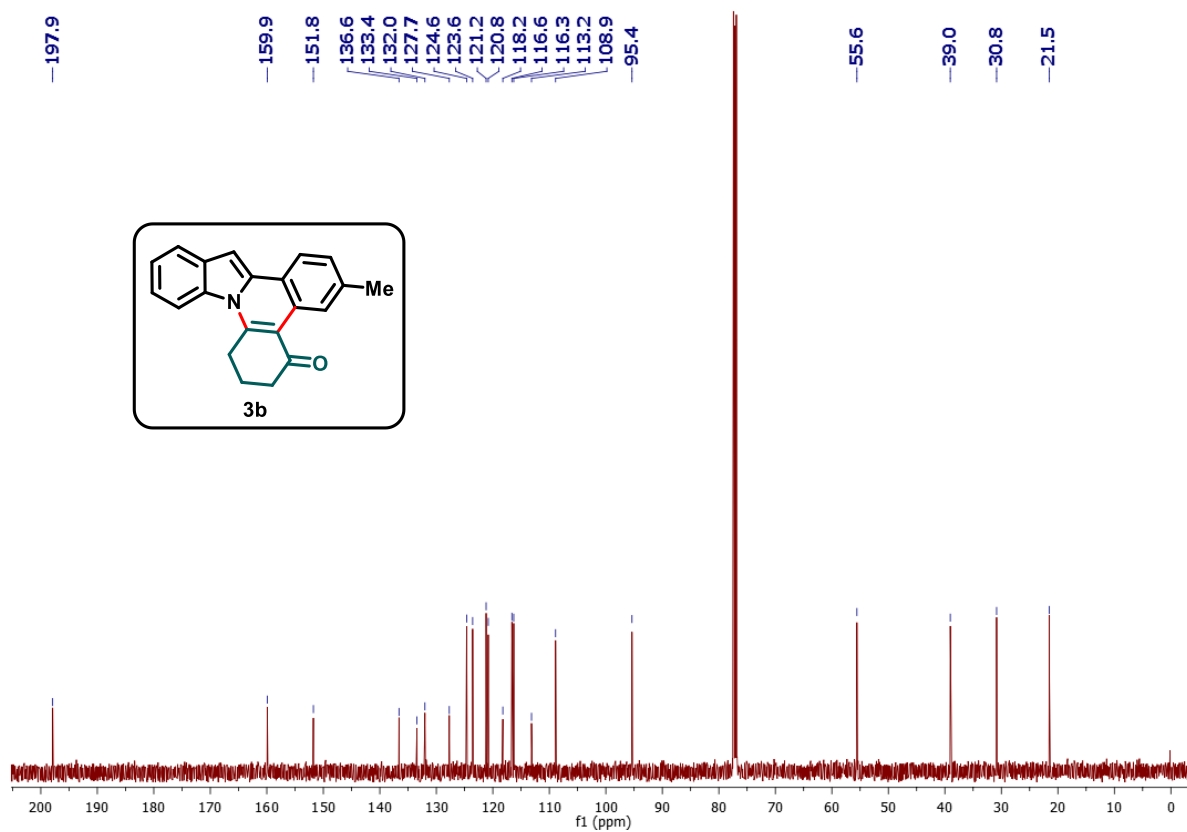

<sup>13</sup>C NMR of compound **3b** (126 MHz, CDCl<sub>3</sub>)

### 3-ethyl-7,8-dihydroindolo[1,2-f]phenanthridin-5(6H)-one (3c):

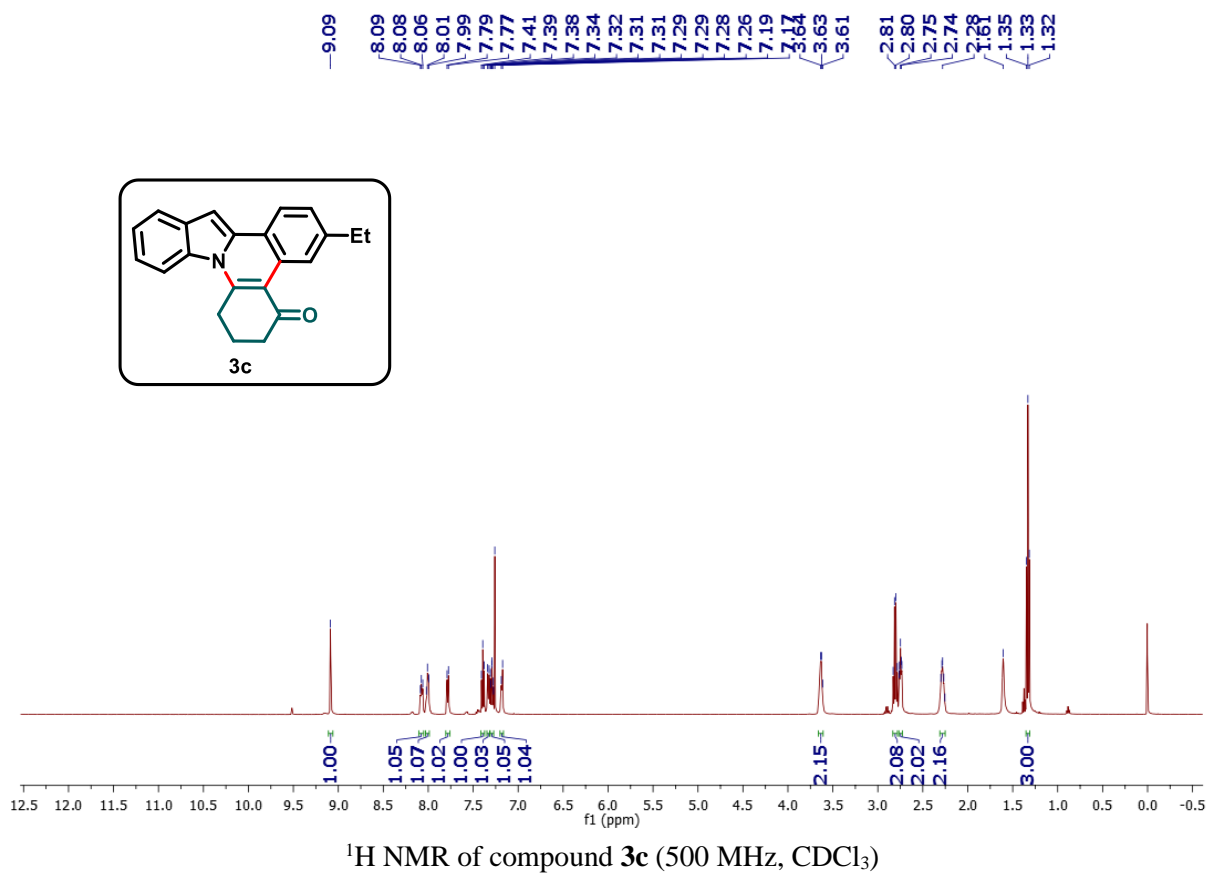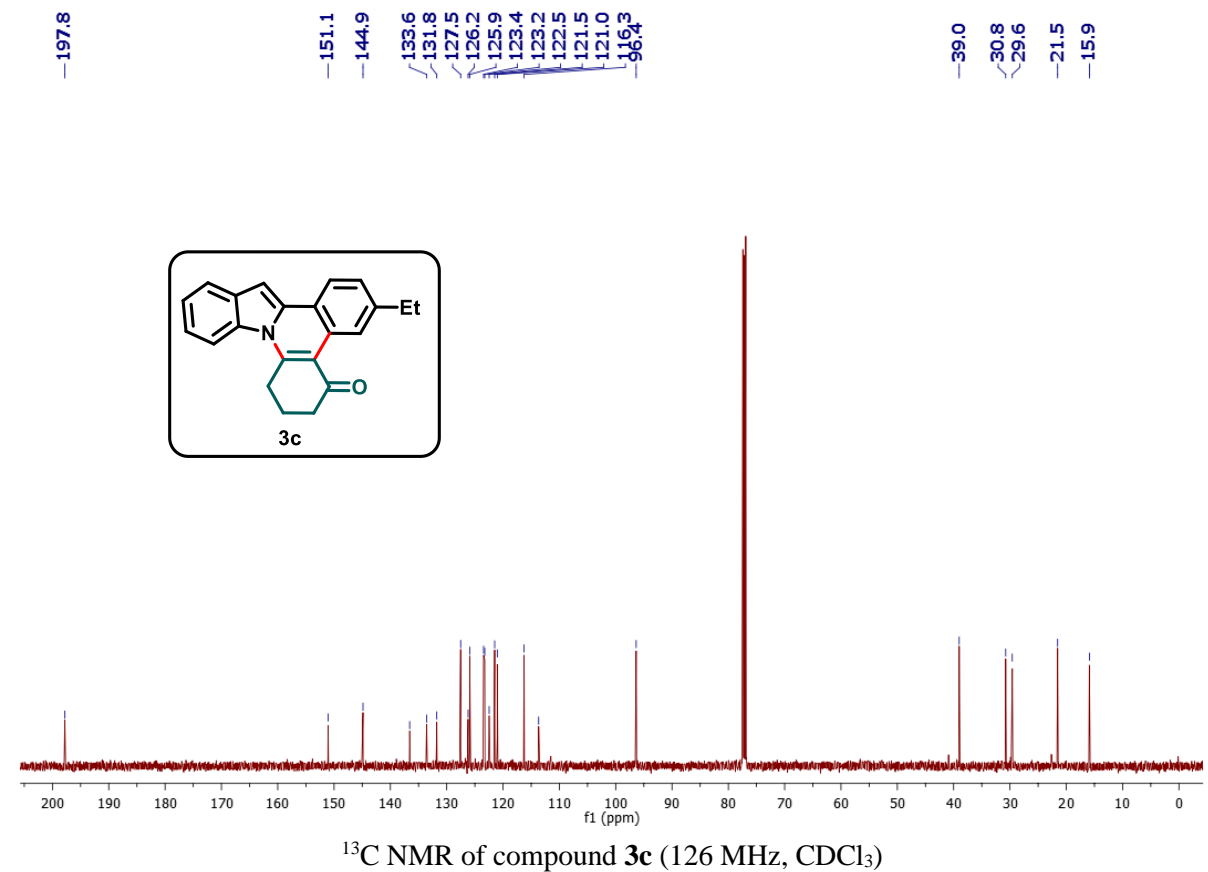

**3-(*tert*-butyl)-7,8-dihydroindolo[1,2-*f*]phenanthridin-5(6*H*)-one (3d):**

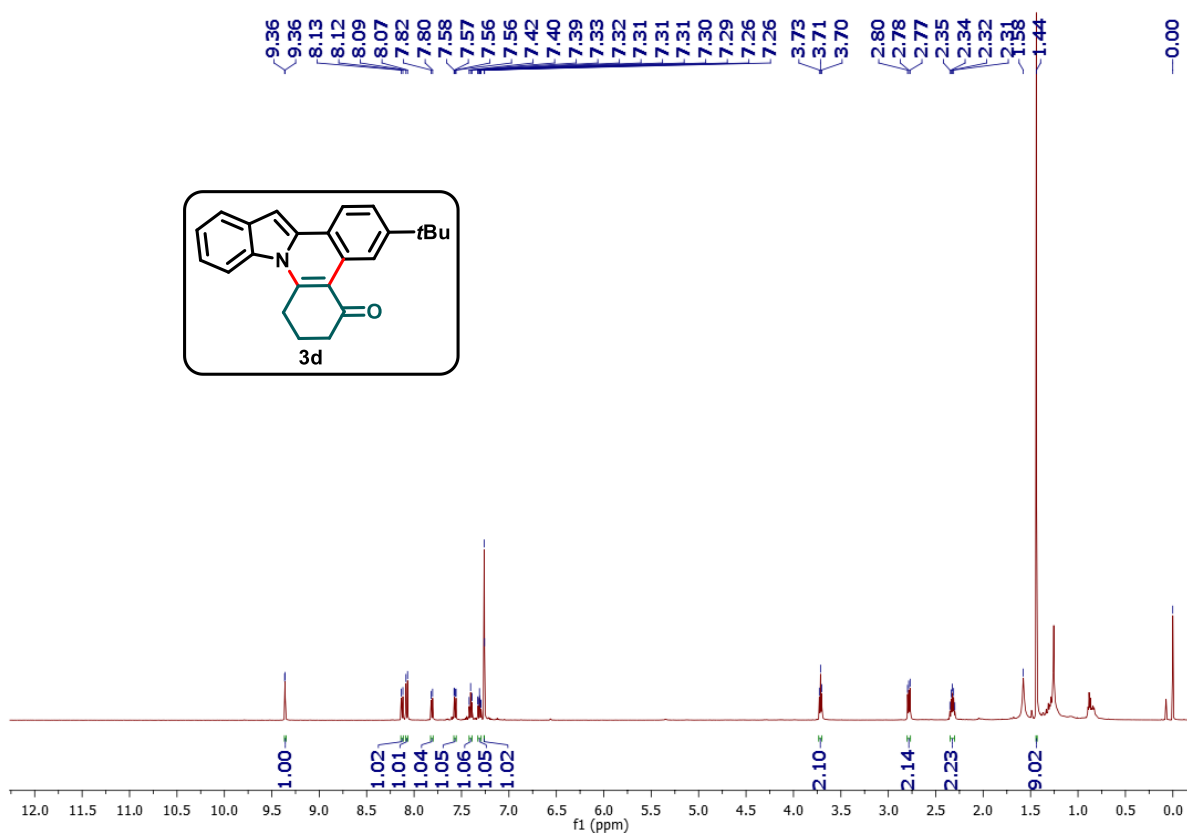

**<sup>1</sup>H NMR of compound 3d (500 MHz, CDCl<sub>3</sub>)**

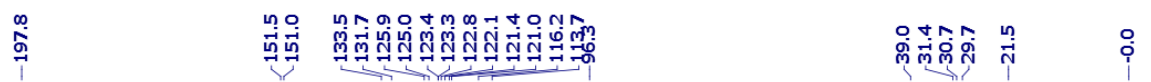

**<sup>13</sup>C NMR of compound 3d (126 MHz, CDCl<sub>3</sub>)**

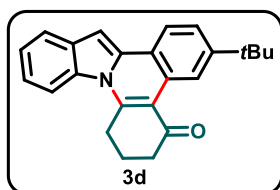

**3-methoxy-7,8-dihydroindolo[1,2-f]phenanthridin-5(6H)-one (3e):**

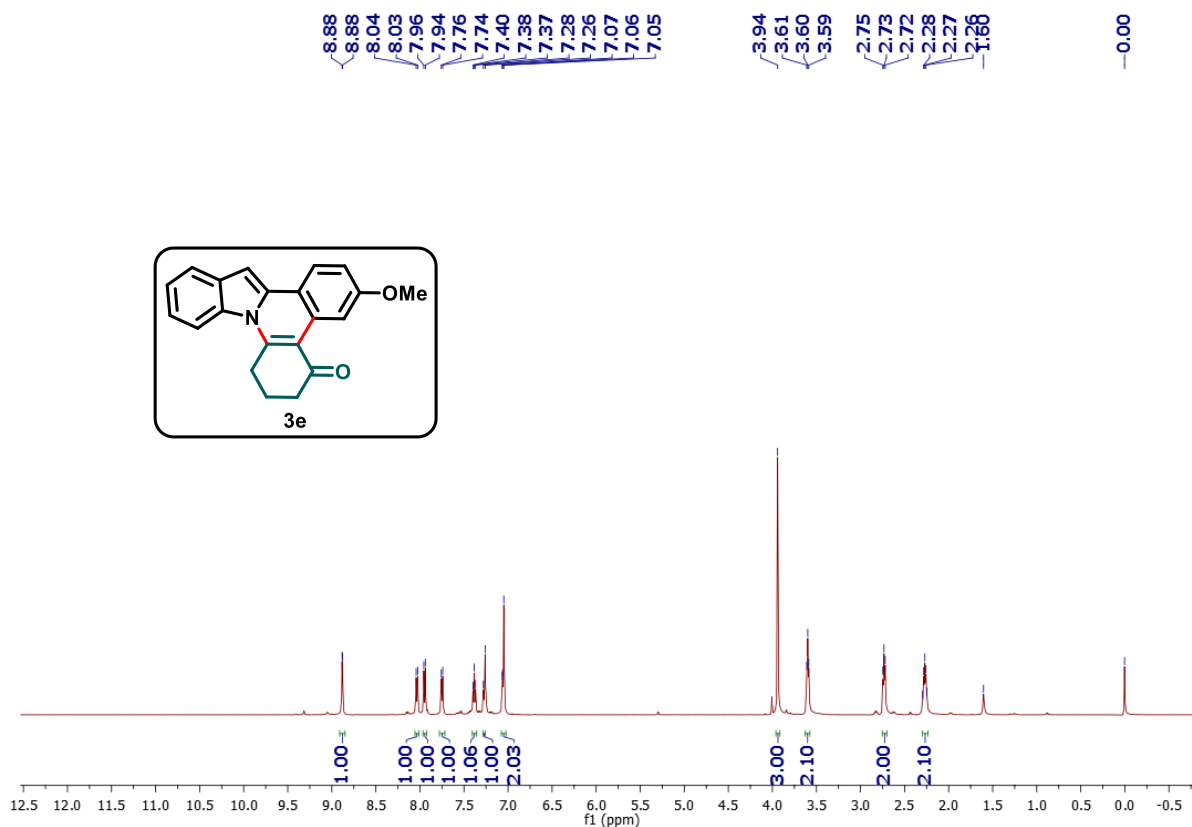

<sup>1</sup>H NMR of compound **3e** (500 MHz, CDCl<sub>3</sub>)

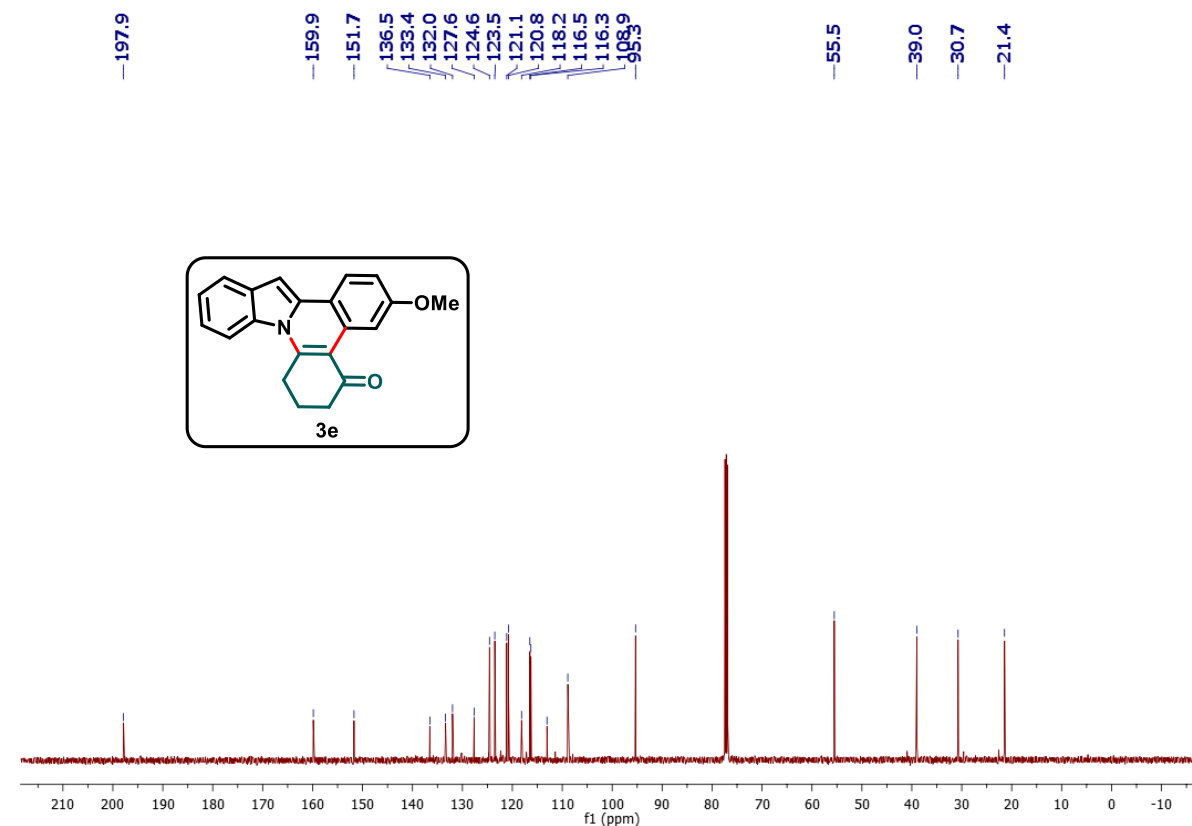

<sup>13</sup>C NMR of compound **3e** (126 MHz, CDCl<sub>3</sub>)



**3-fluoro-7,8-dihydroindolo[1,2-f]phenanthridin-5(6H)-one (3f):**

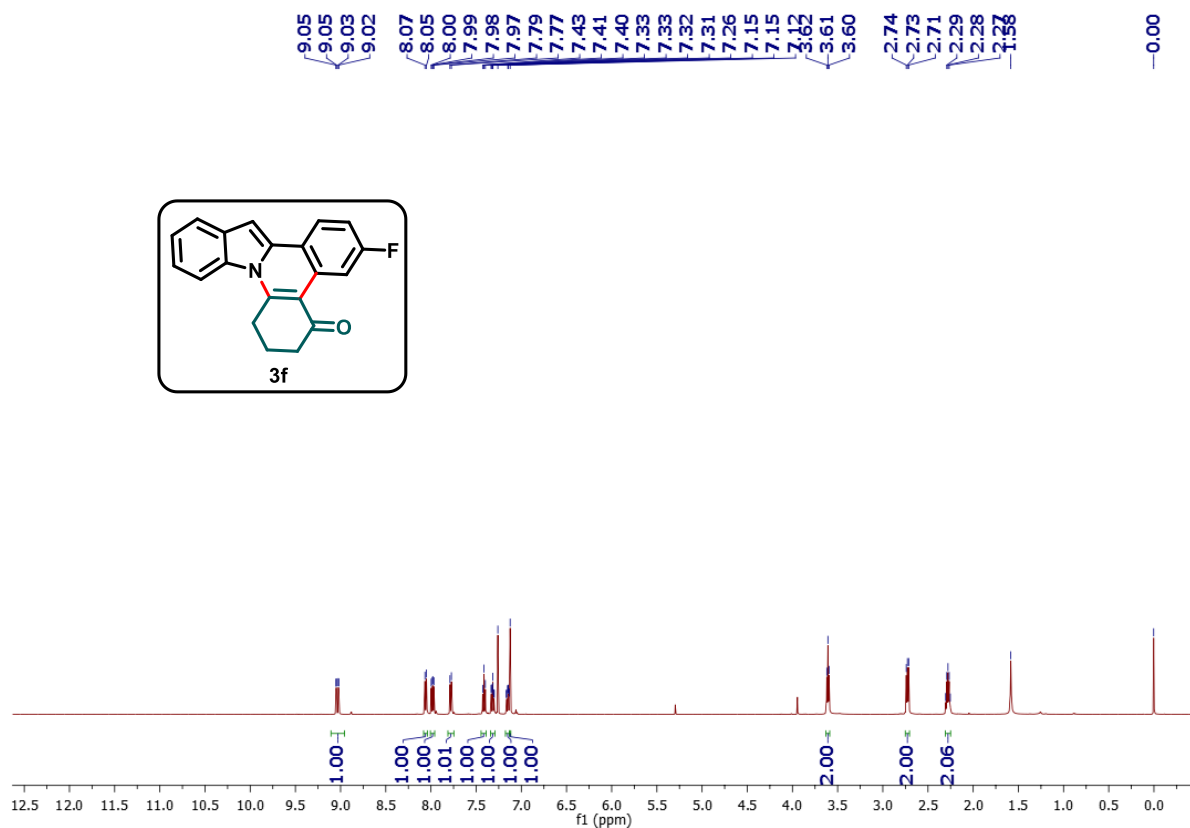

<sup>1</sup>H NMR of compound **3f** (500 MHz, CDCl<sub>3</sub>)

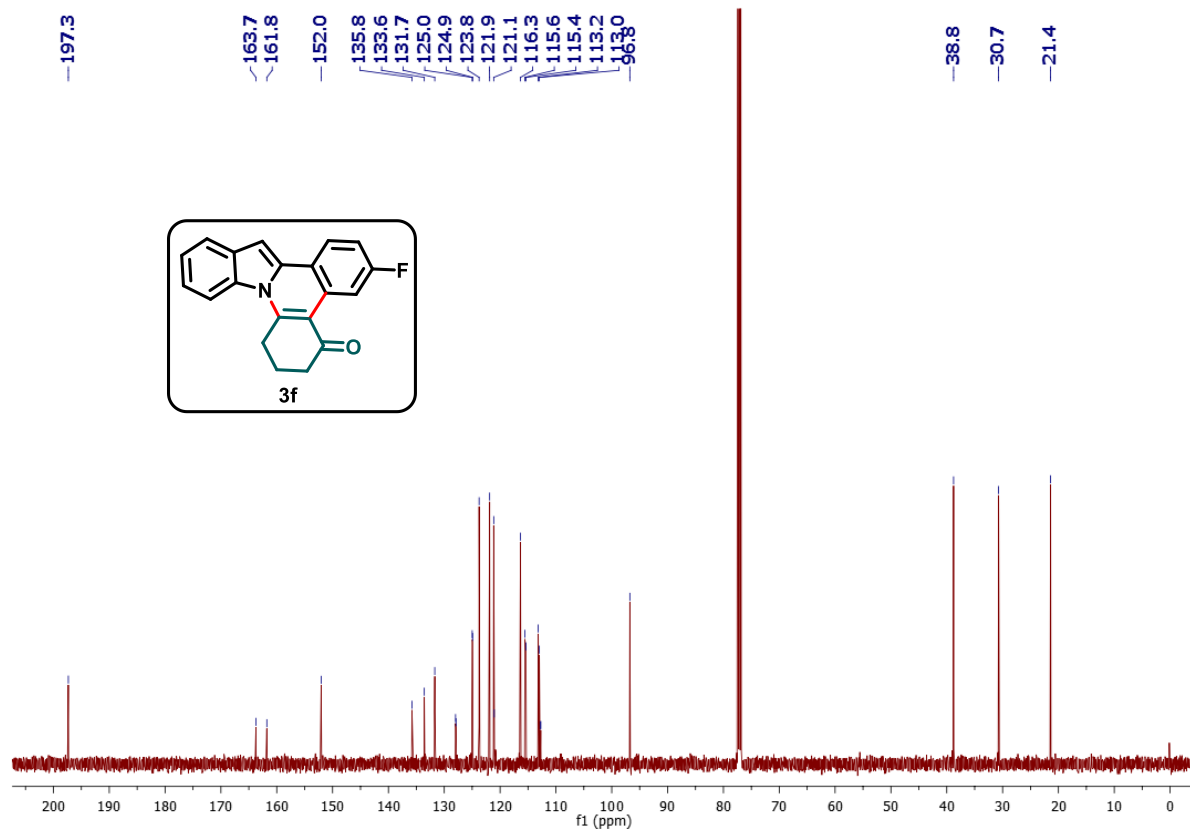

<sup>13</sup>C NMR of compound **3f** (126 MHz, CDCl<sub>3</sub>)

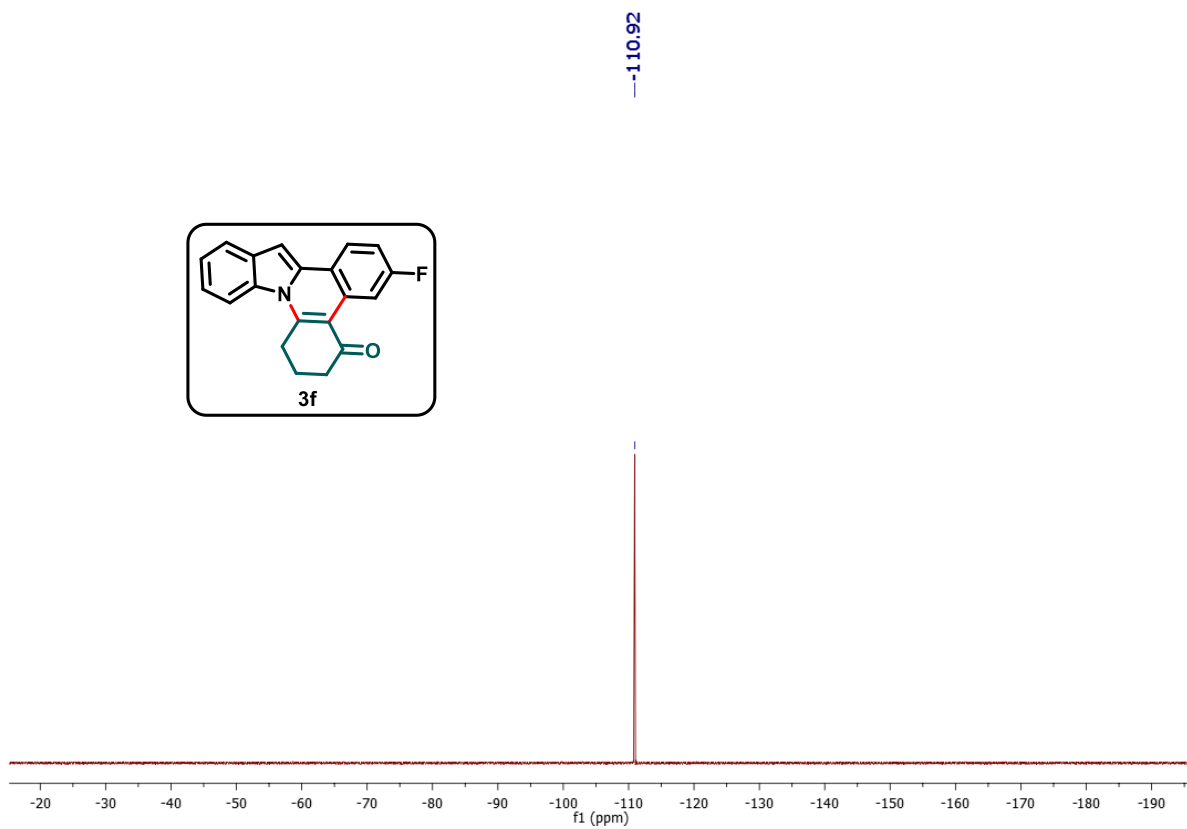

$^{19}\text{F}$  NMR of compound **3f** (470 MHz,  $\text{CDCl}_3$ )

**3-chloro-7,8-dihydroindolo[1,2-*f*]phenanthridin-5(6*H*)-one: (3g):**

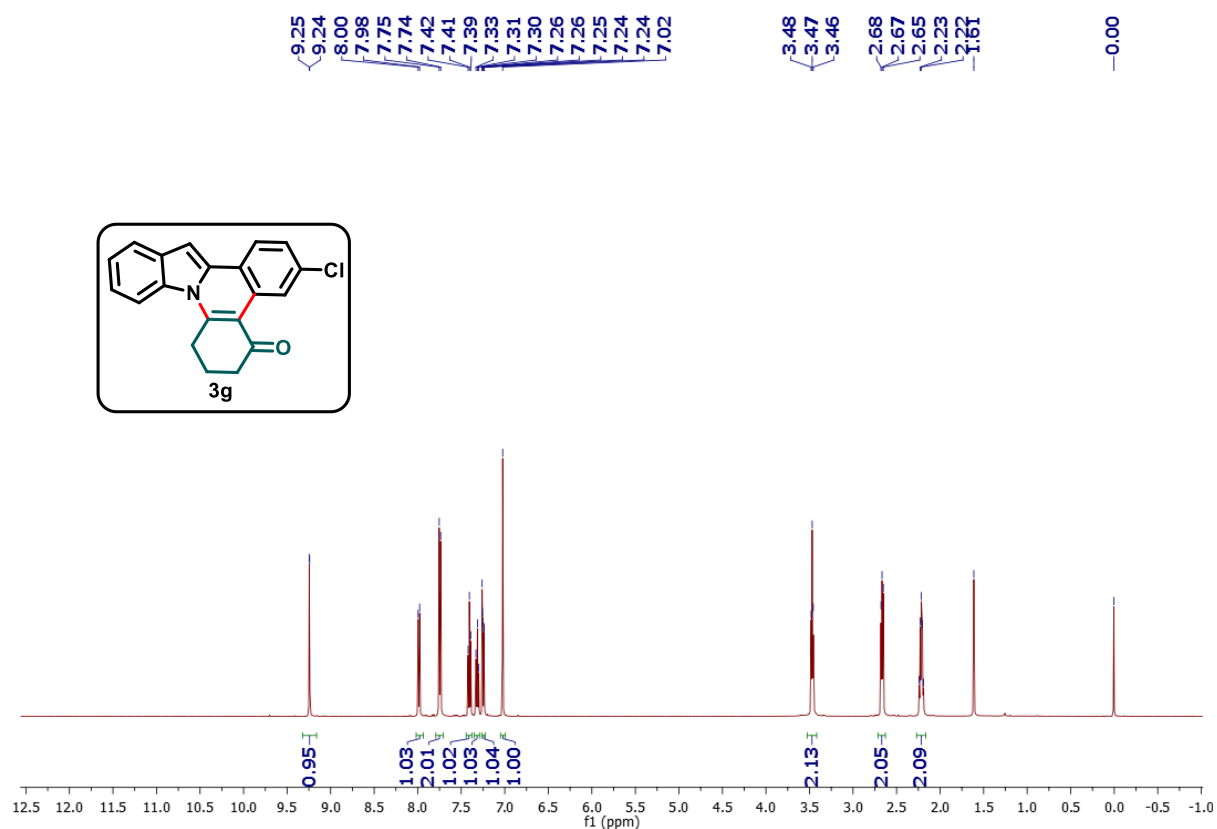

**<sup>1</sup>H NMR of compound 3g (500 MHz, CDCl<sub>3</sub>)**

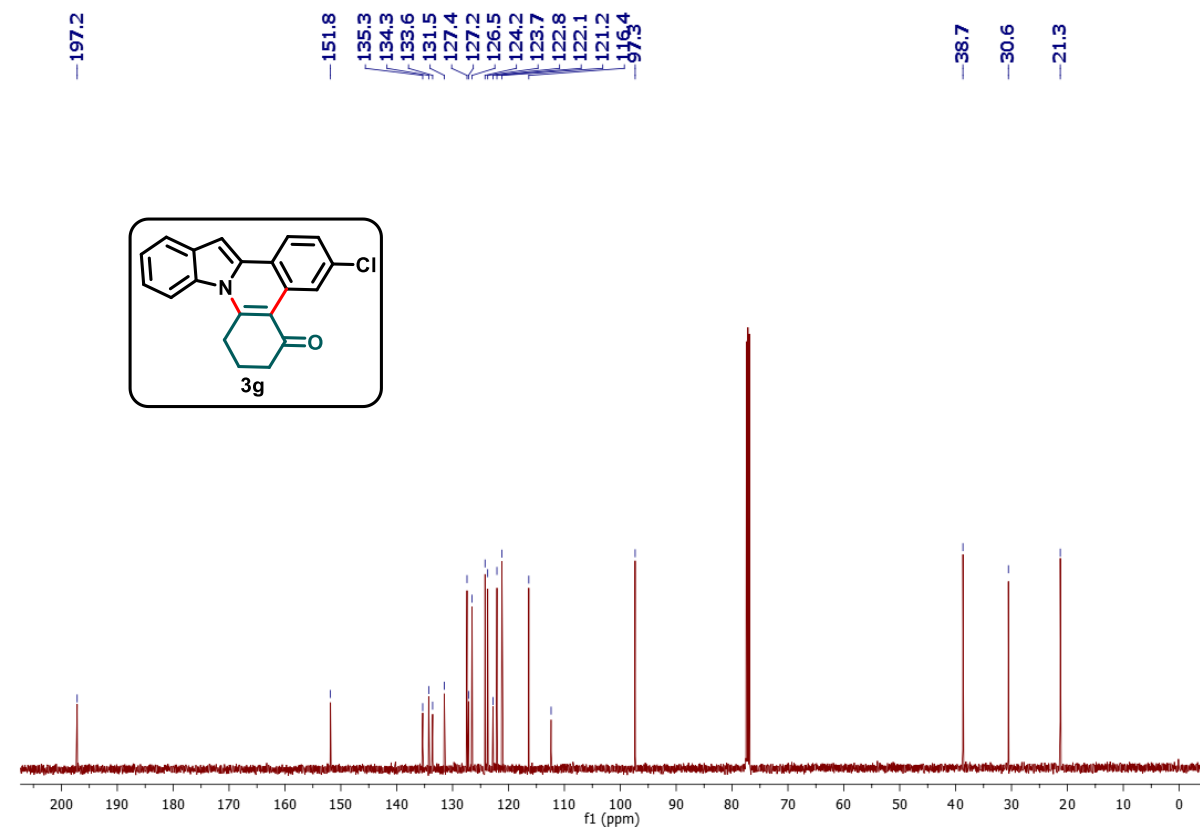

**<sup>13</sup>C NMR of compound 3g (126 MHz, CDCl<sub>3</sub>)**

### 3-bromo-7,8-dihydroindolo[1,2-*f*]phenanthridin-5(6*H*)-one (3h):

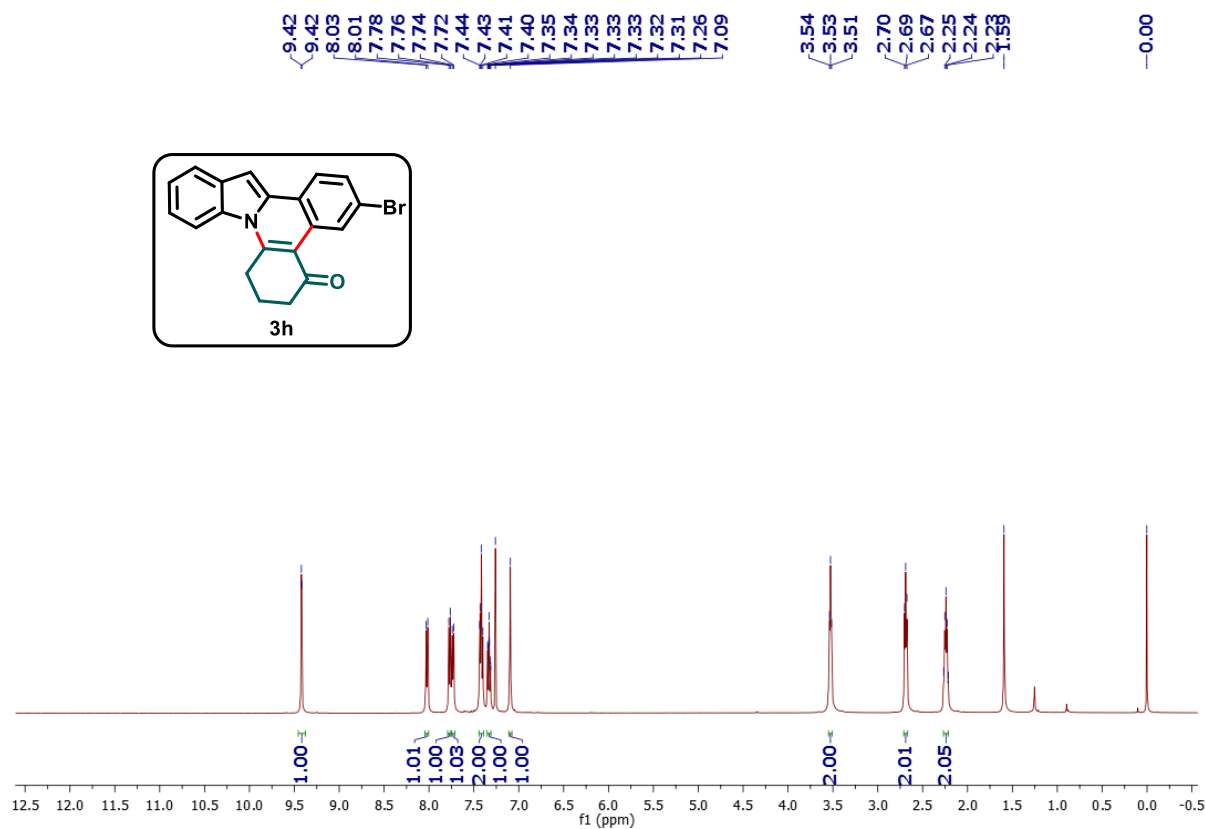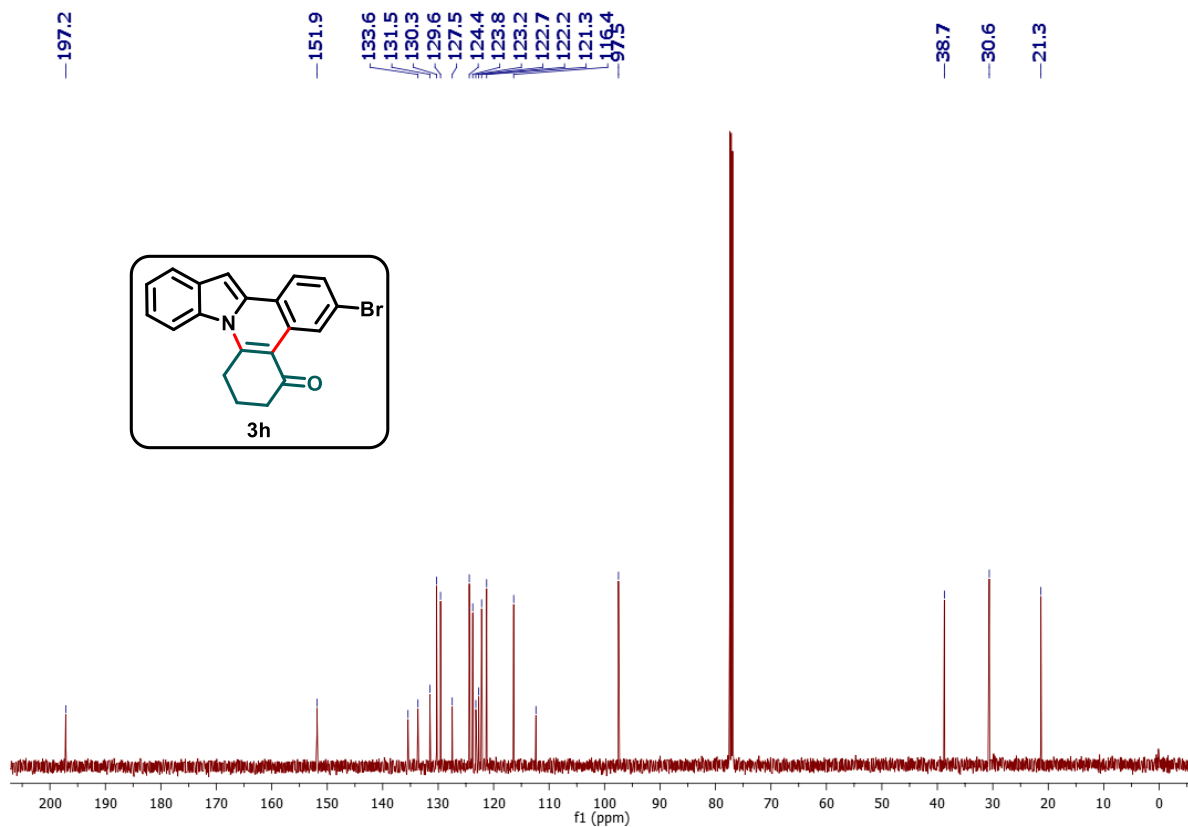

**3-(trifluoromethyl)-7,8-dihydroindolo[1,2-*f*]phenanthridin-5(6*H*)-one(3i):**

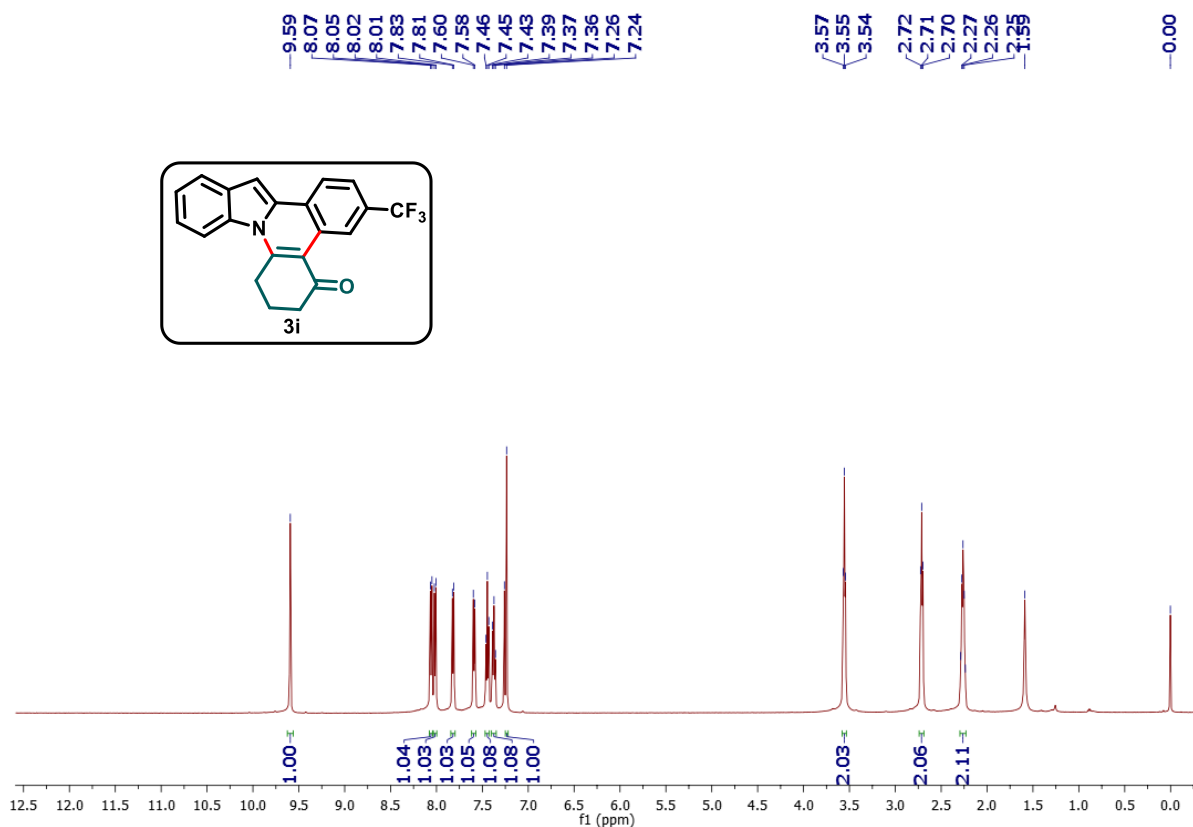

<sup>1</sup>H NMR of compound **3i** (500 MHz, CDCl<sub>3</sub>)

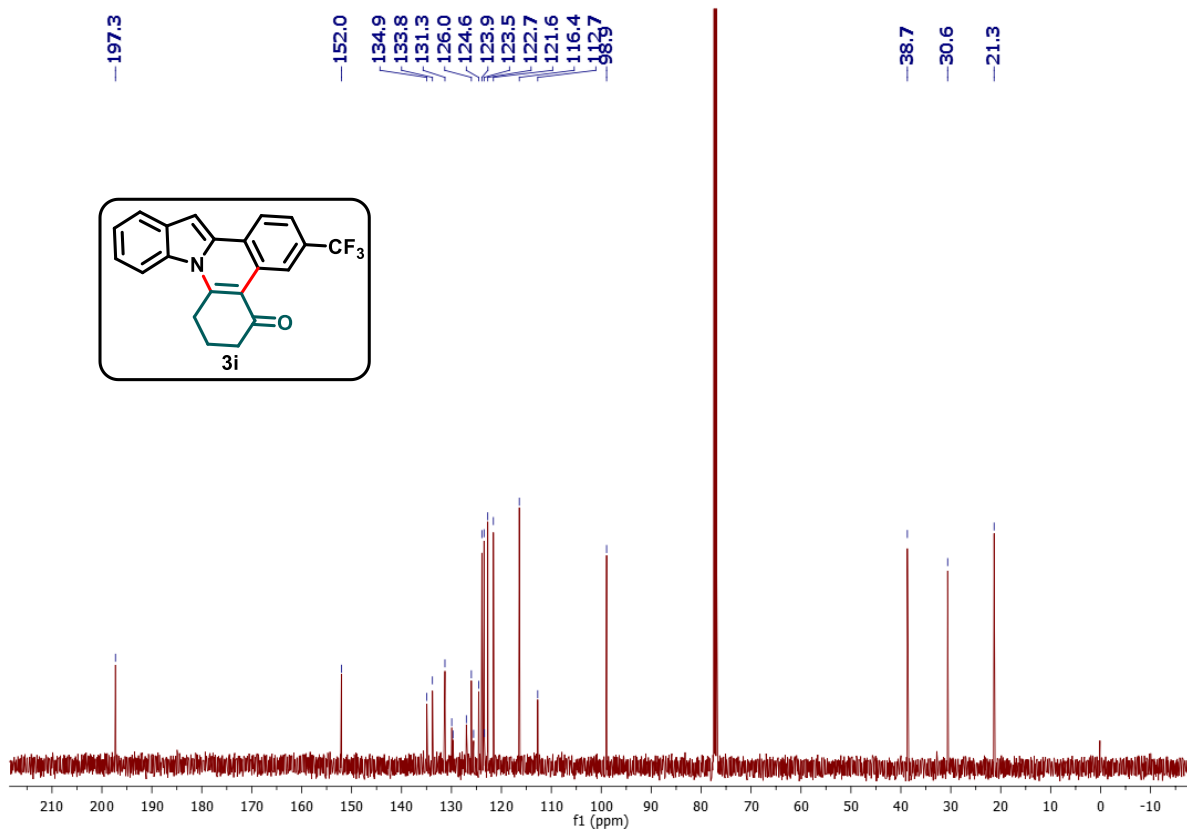

<sup>13</sup>C NMR of compound **3i** (126 MHz, CDCl<sub>3</sub>)

-62.22

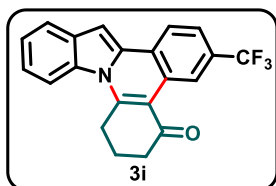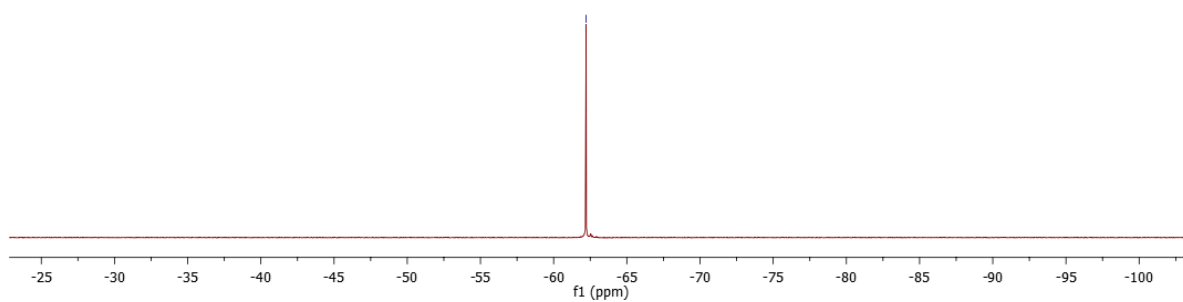

<sup>19</sup>F NMR of compound **3i** (470 MHz, CDCl<sub>3</sub>)

5-oxo-5,6,7,8-tetrahydroindolo[1,2-f]phenanthridine-3-carbonitrile (**3j**):

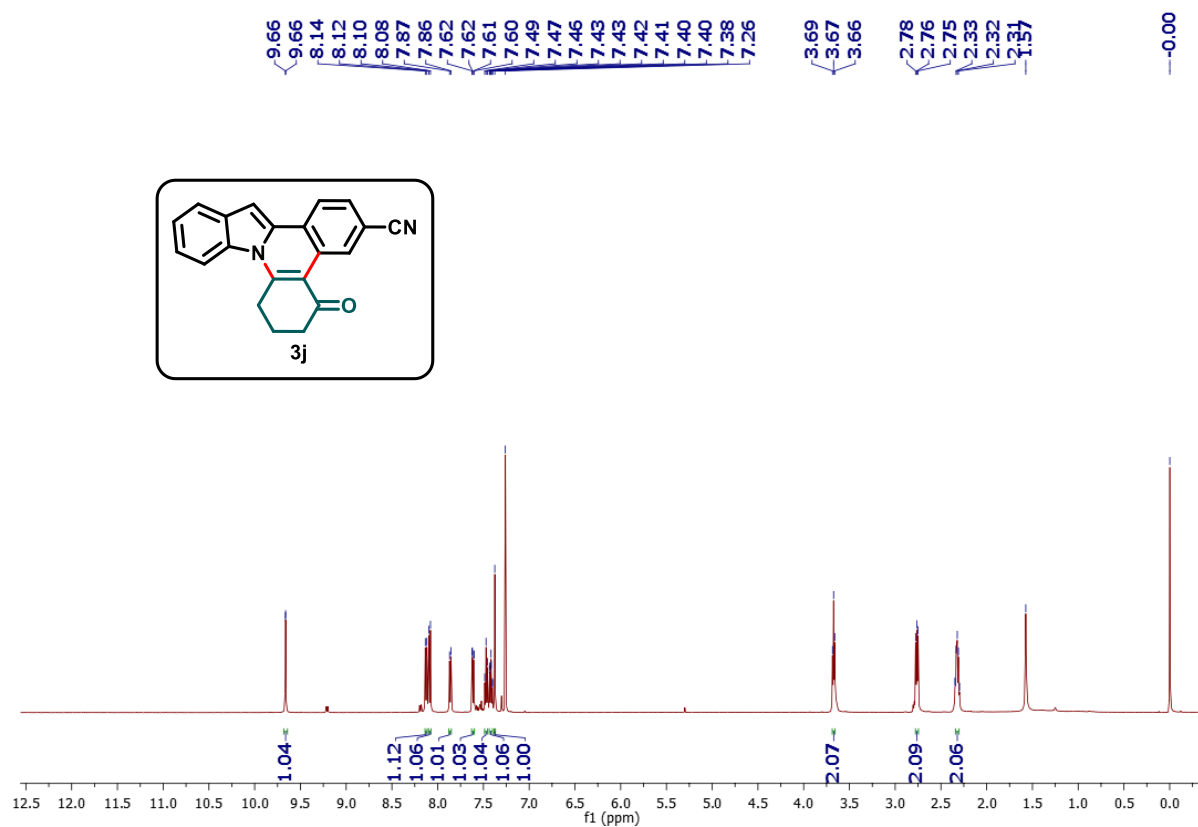

<sup>1</sup>H NMR of compound **3j** (500 MHz, CDCl<sub>3</sub>)

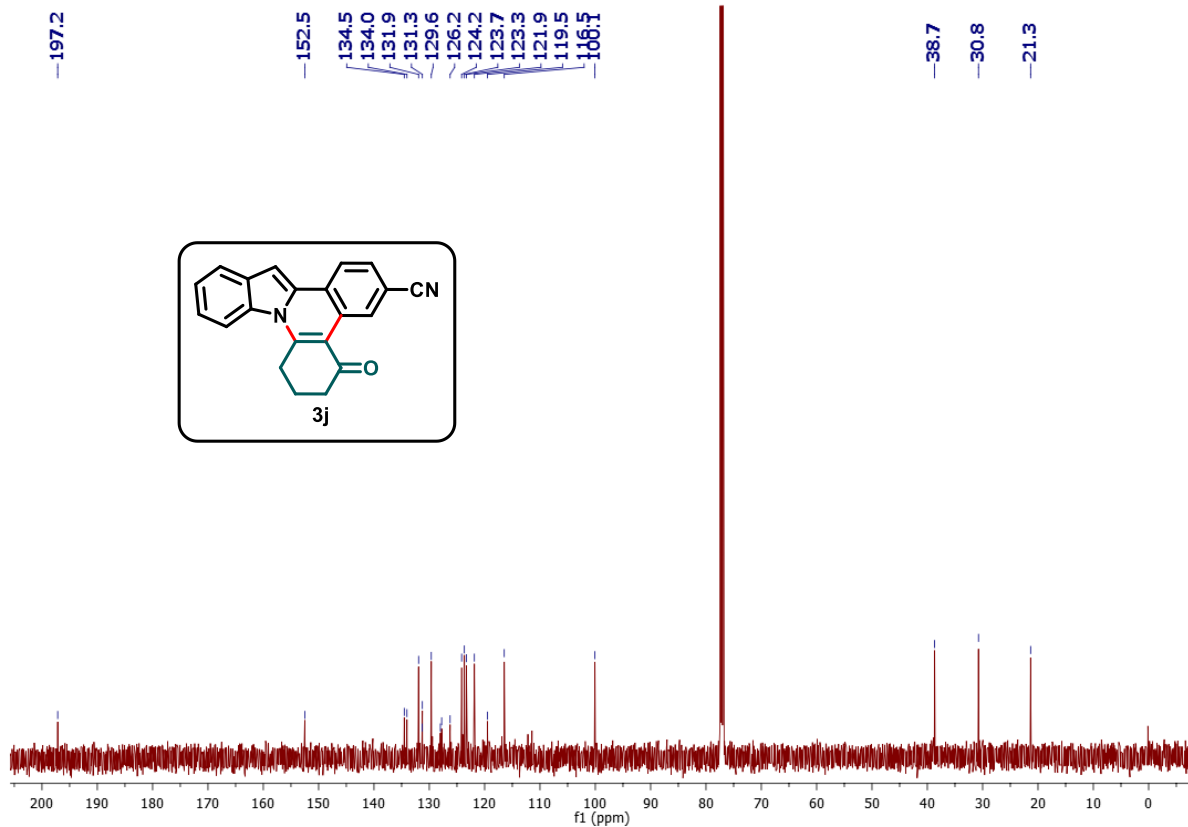

<sup>13</sup>C NMR of compound **3j** (126 MHz, CDCl<sub>3</sub>)

2-methoxy-7,8-dihydroindolo[1,2-f]phenanthridin-5(6H)-one (3k):

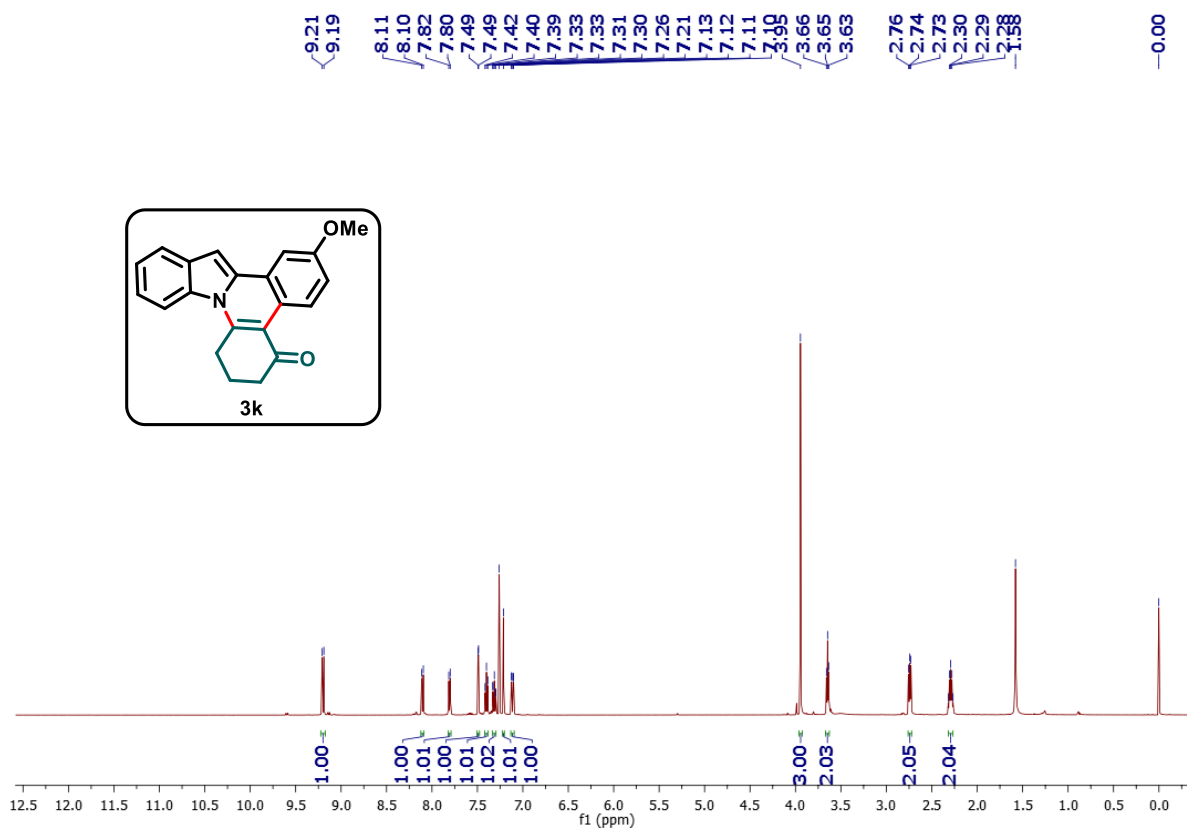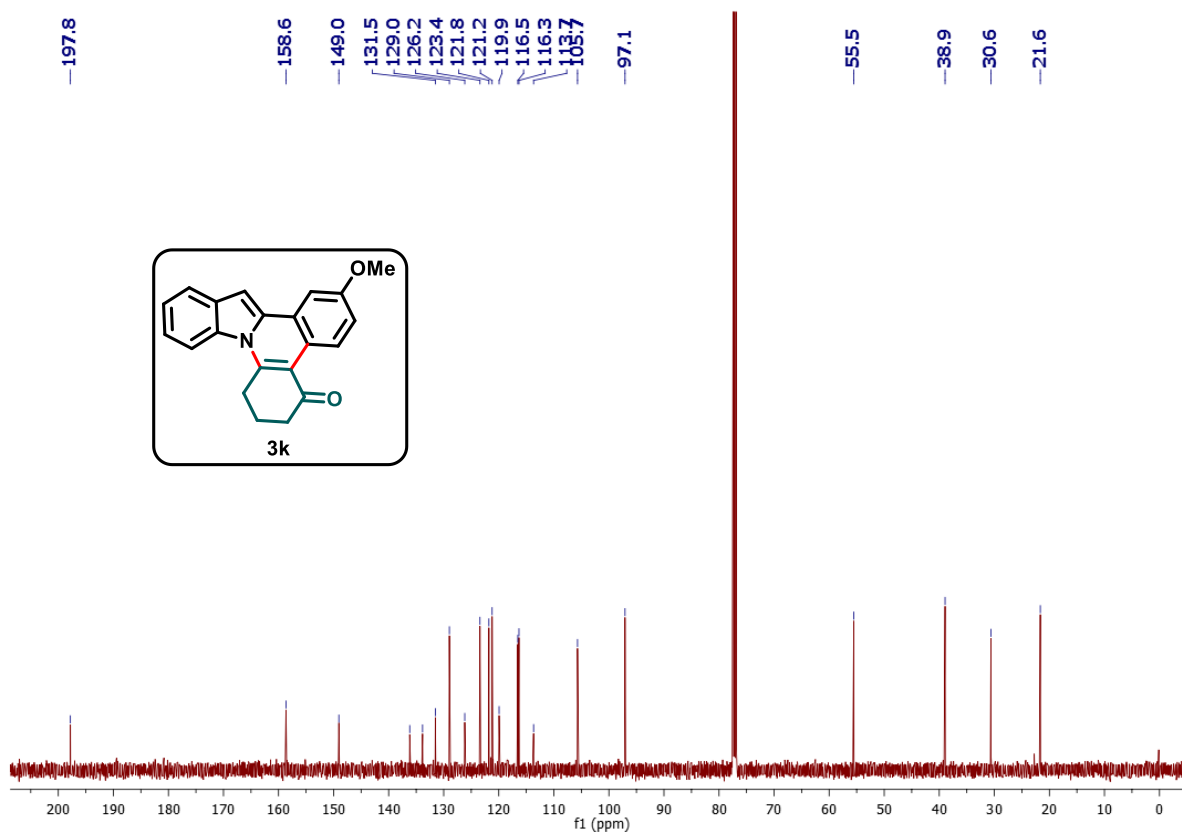



**2-bromo-7,8-dihydroindolo[1,2-*f*]phenanthridin-5(6*H*)-one (3I):**

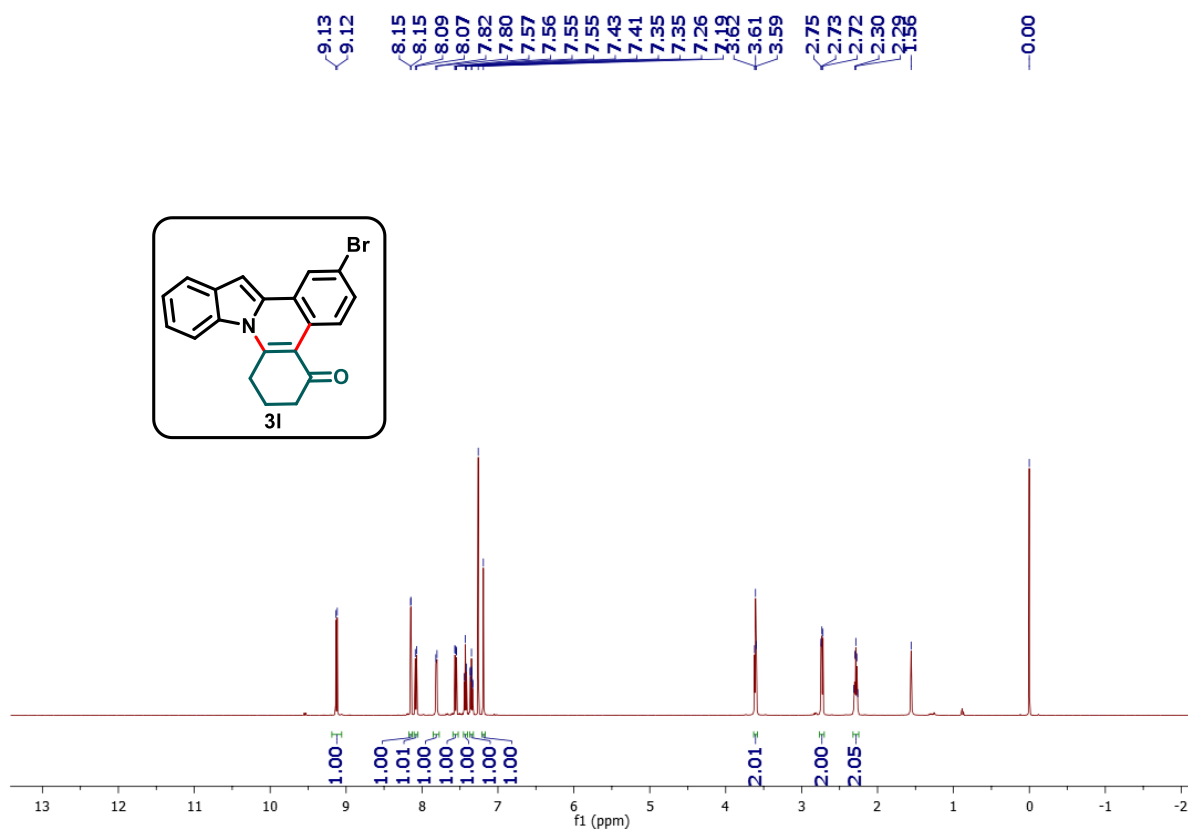

<sup>1</sup>H NMR of compound **3I** (500 MHz, CDCl<sub>3</sub>)

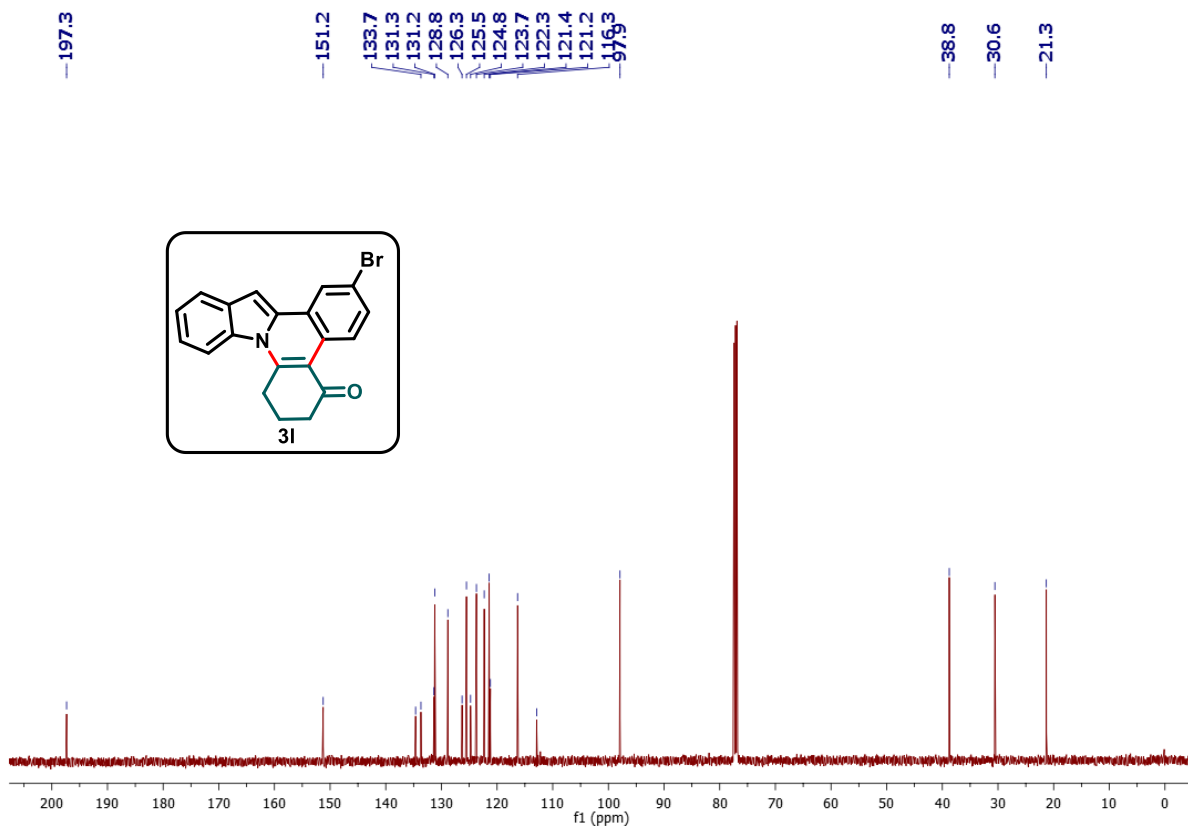

<sup>13</sup>C NMR of compound **3I** (126 MHz, CDCl<sub>3</sub>)

**2,3-dichloro-7,8-dihydroindolo[1,2-*f*]phenanthridin-5(6*H*)-one (3m):**

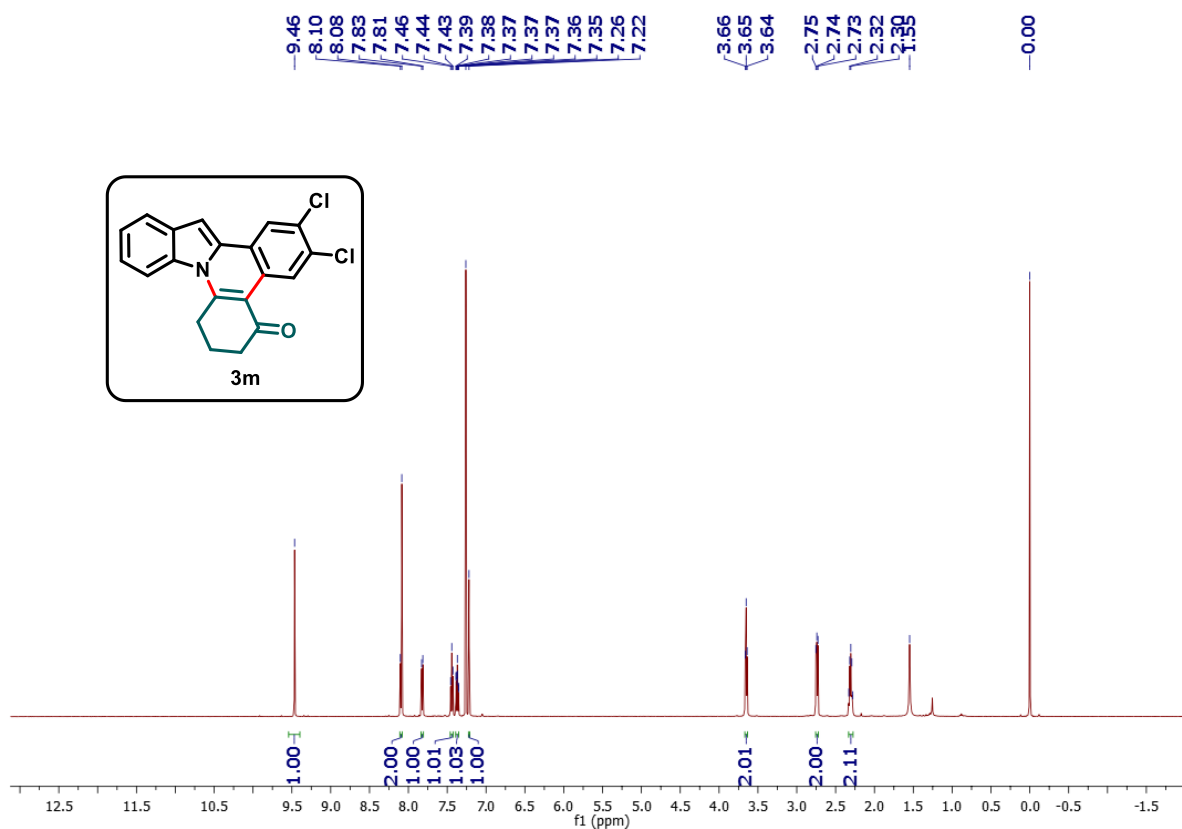

**<sup>1</sup>H NMR of compound 3m (500 MHz, CDCl<sub>3</sub>)**

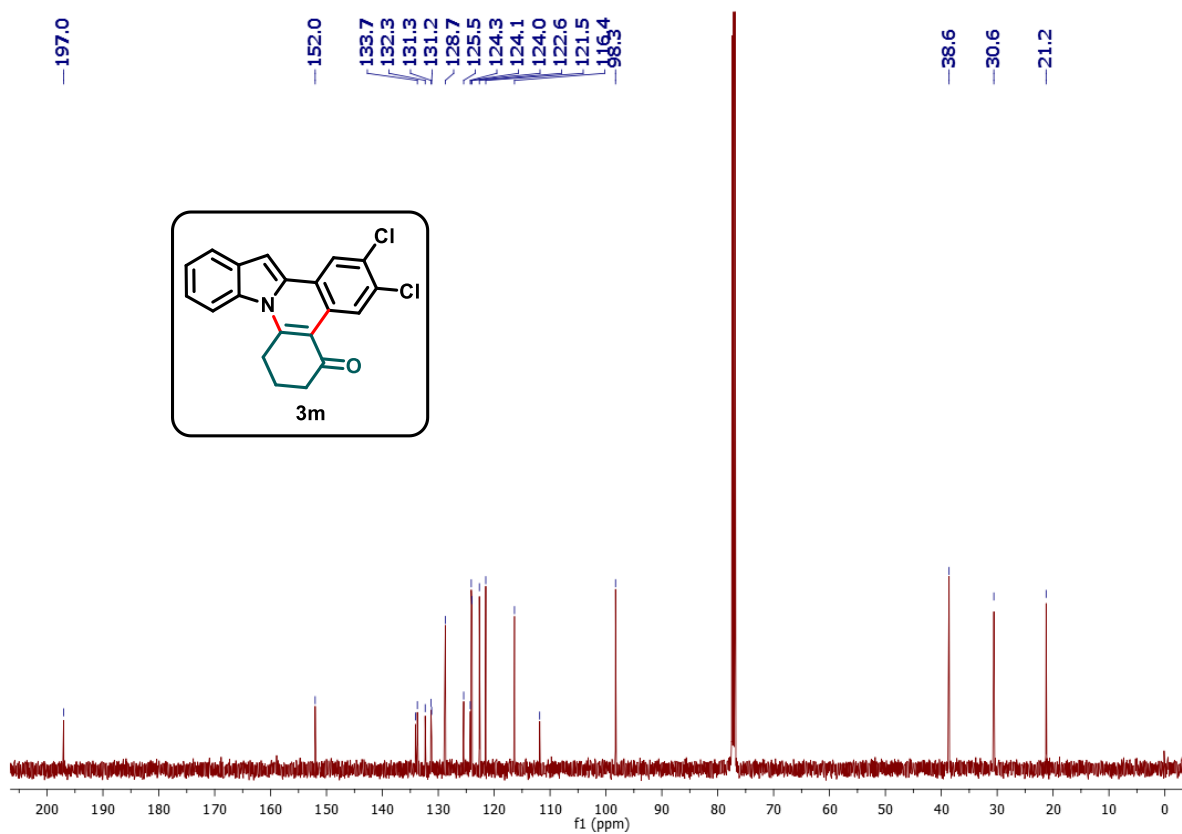

**<sup>13</sup>C NMR of compound 3m (126 MHz, CDCl<sub>3</sub>)**

7,8-dihydrobenzo[*j*]indolo[1,2-*f*]phenanthridin-9(6*H*)-one (**3n**):

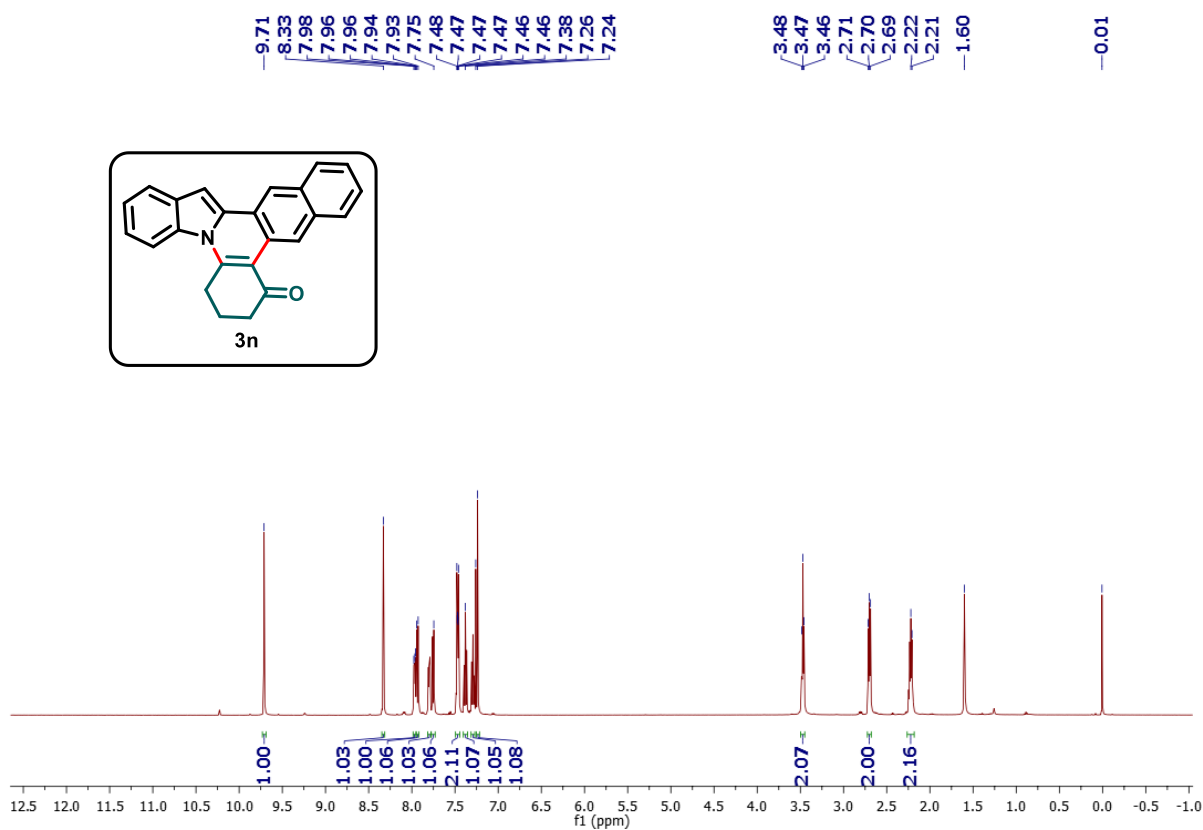

<sup>1</sup>H NMR of compound **3n** (500 MHz, CDCl<sub>3</sub>)

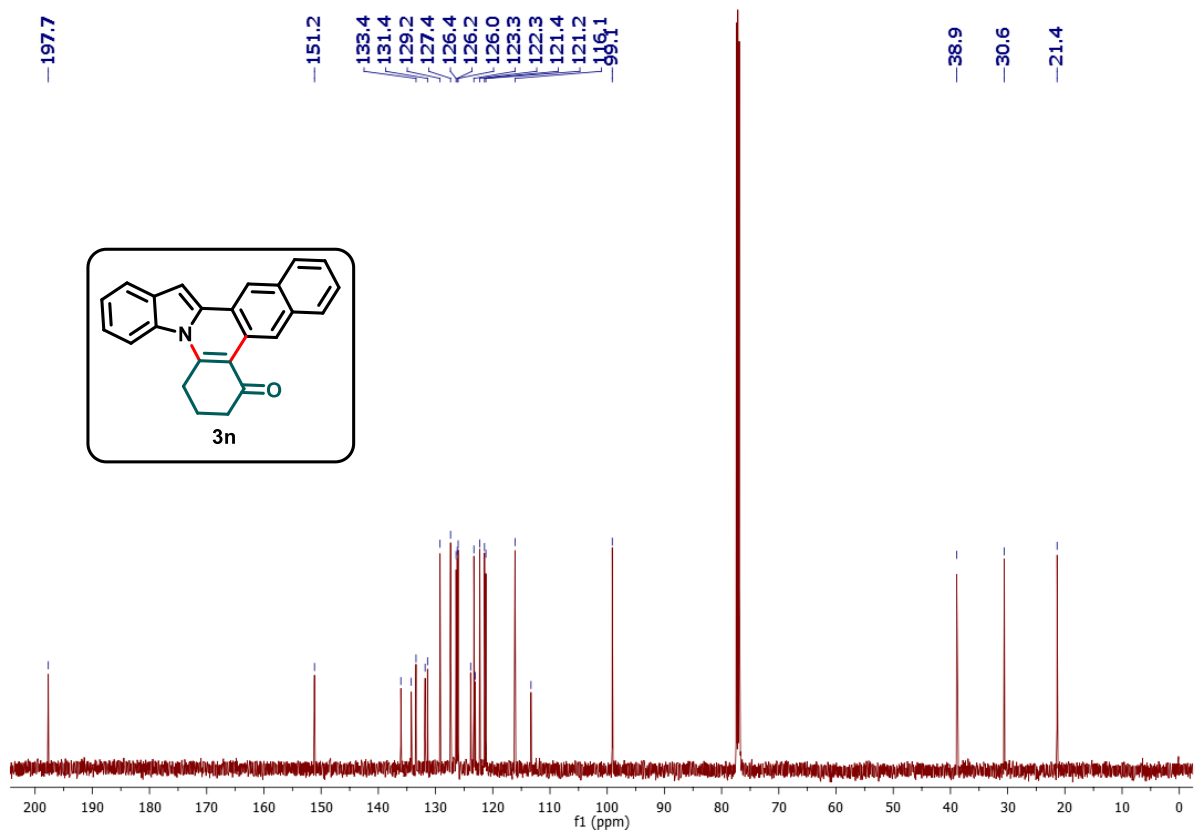

<sup>13</sup>C NMR of compound **3n** (126 MHz, CDCl<sub>3</sub>)

**9,10-dihydrobenzo[*i*]indolo[1,2-*f*]phenanthridin-7(8*H*)-one (3o):**

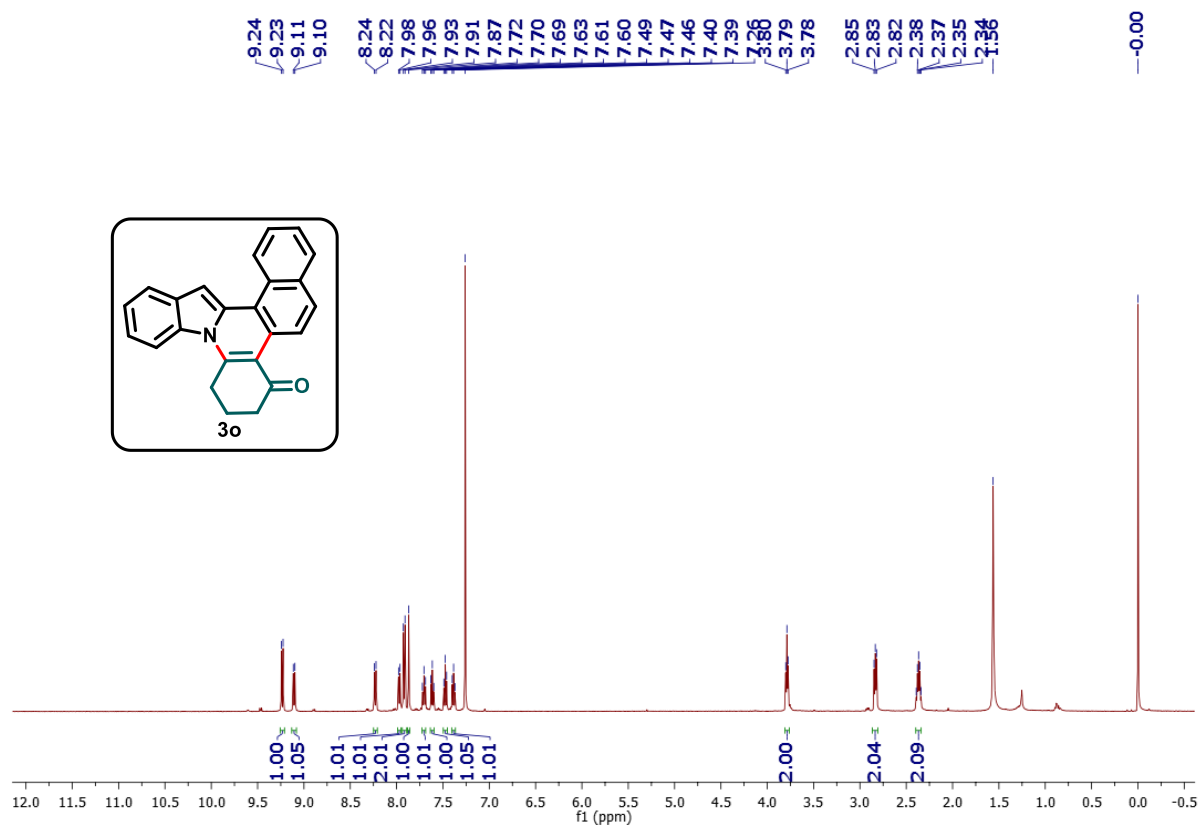

<sup>1</sup>H NMR of compound 3o (500 MHz, CDCl<sub>3</sub>)

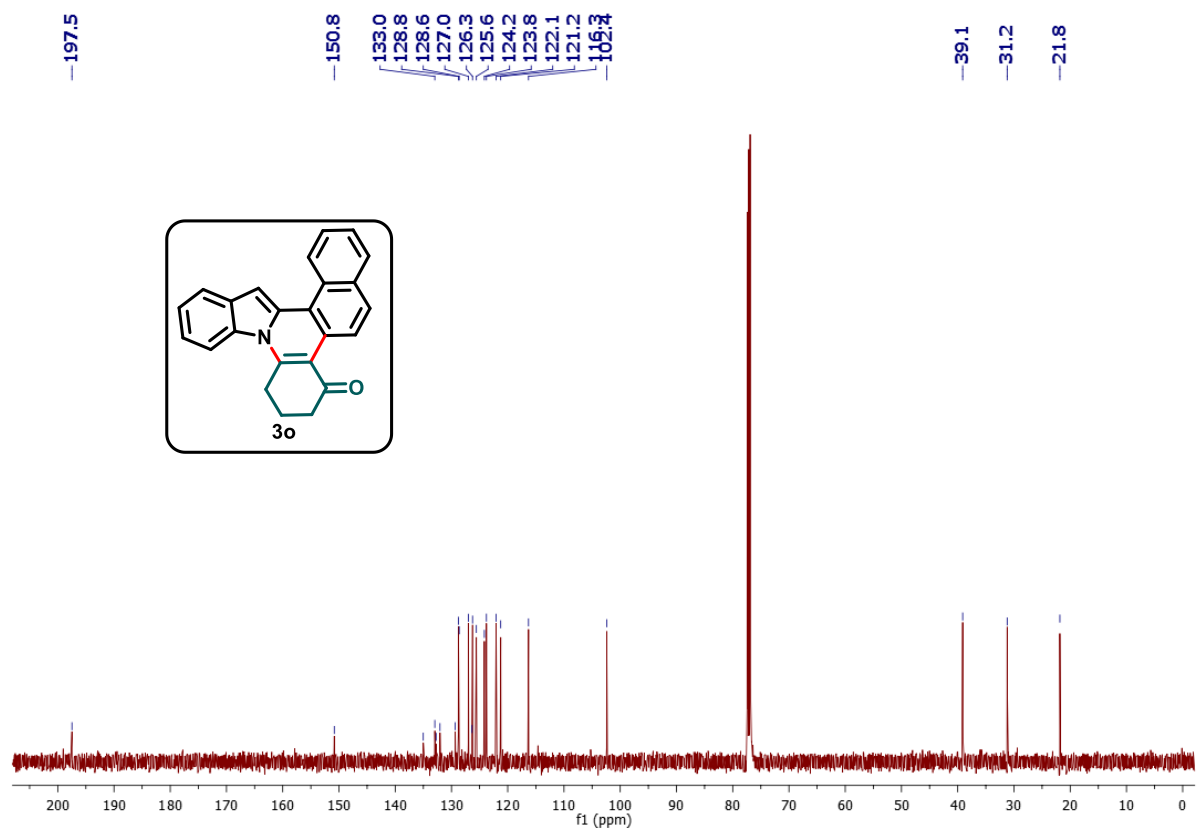

<sup>13</sup>C NMR of compound 3o (126 MHz, CDCl<sub>3</sub>)

**14-methyl-7,8-dihydroindolo[1,2-f]phenanthridin-5(6H)-one (3p):**

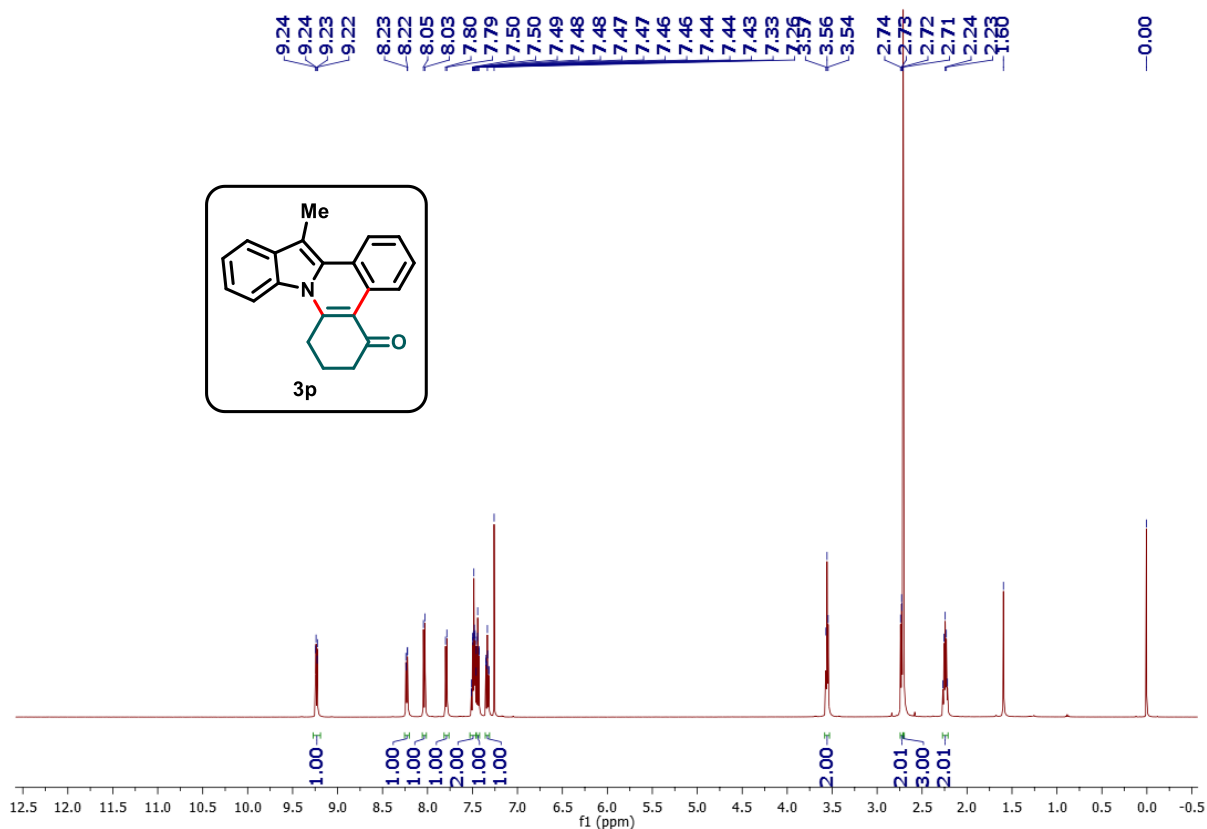

<sup>1</sup>H NMR of compound **3p** (500 MHz, CDCl<sub>3</sub>)

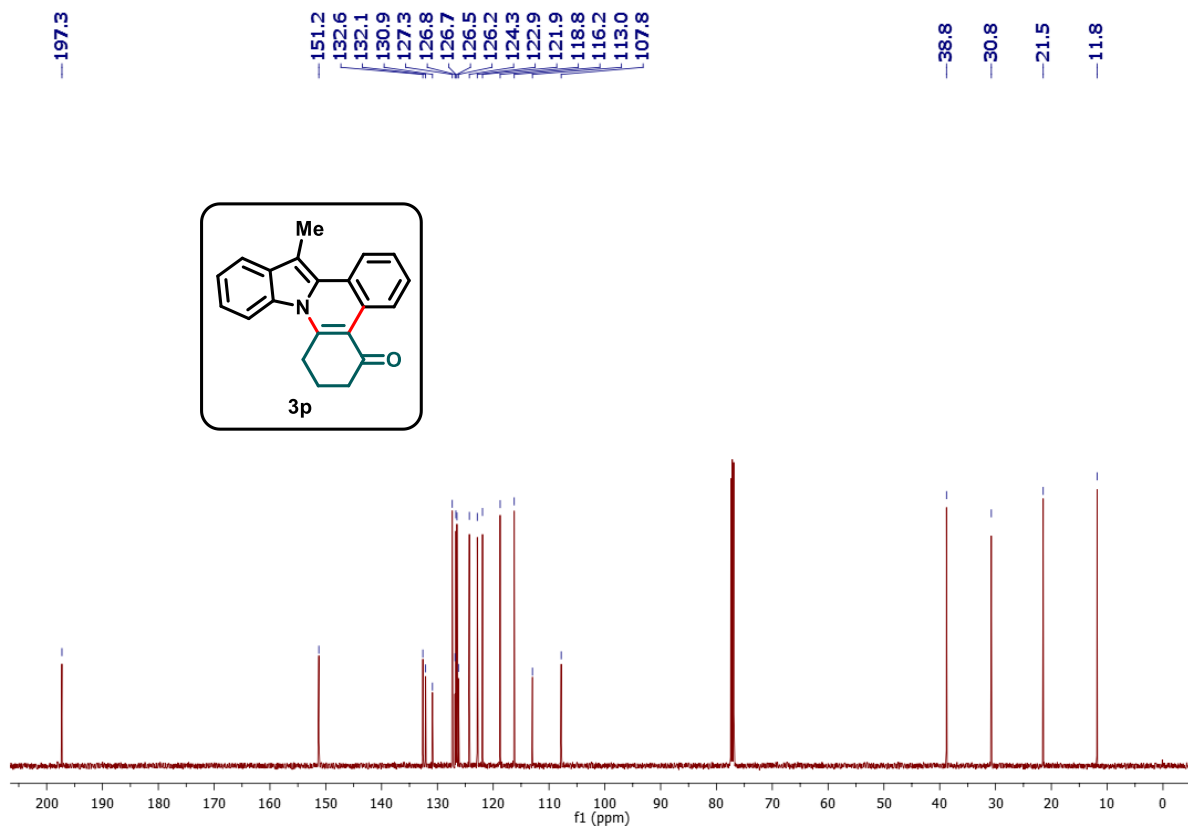

<sup>13</sup>C NMR of compound **3p** (126 MHz, CDCl<sub>3</sub>)

***N*-(2-(5-oxo-5,6,7,8-tetrahydroindolo[1,2-*f*]phenanthridin-14-yl)ethyl)acetamide (3q):**

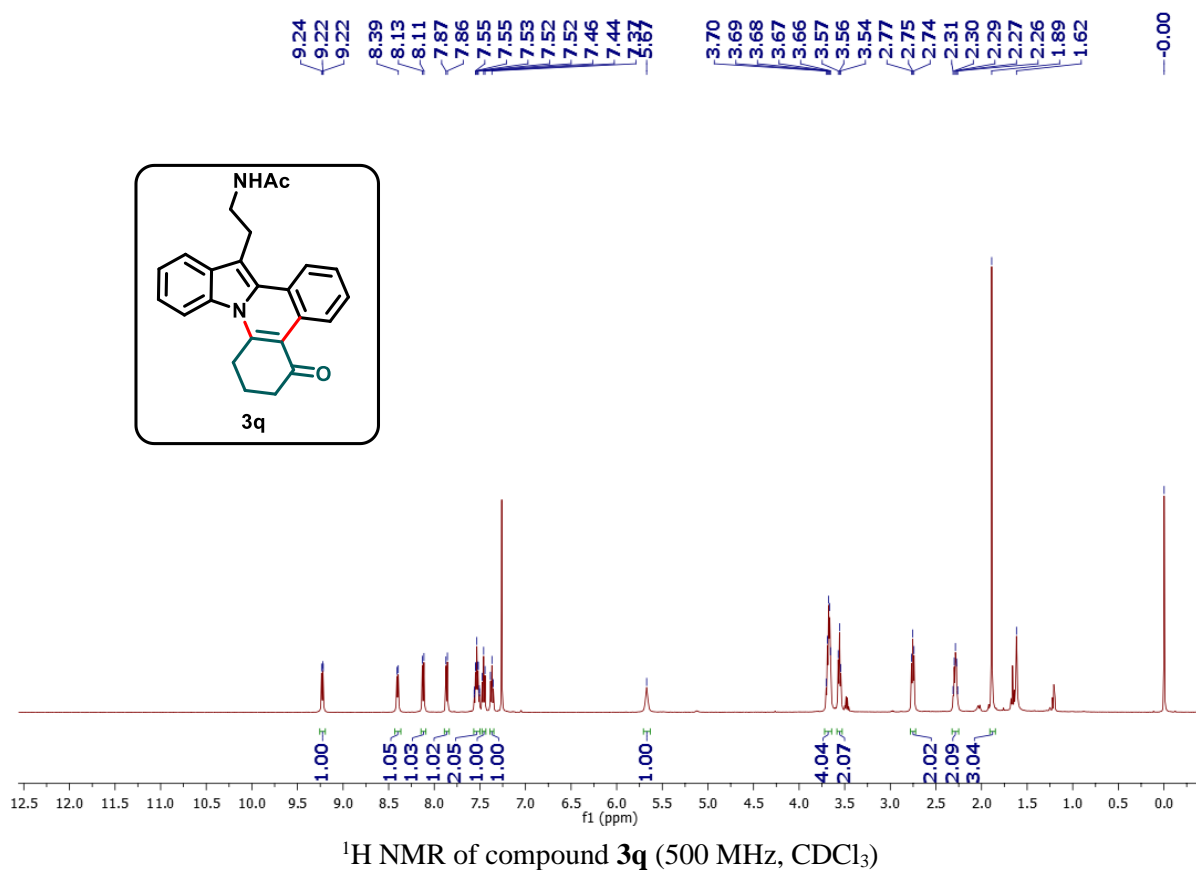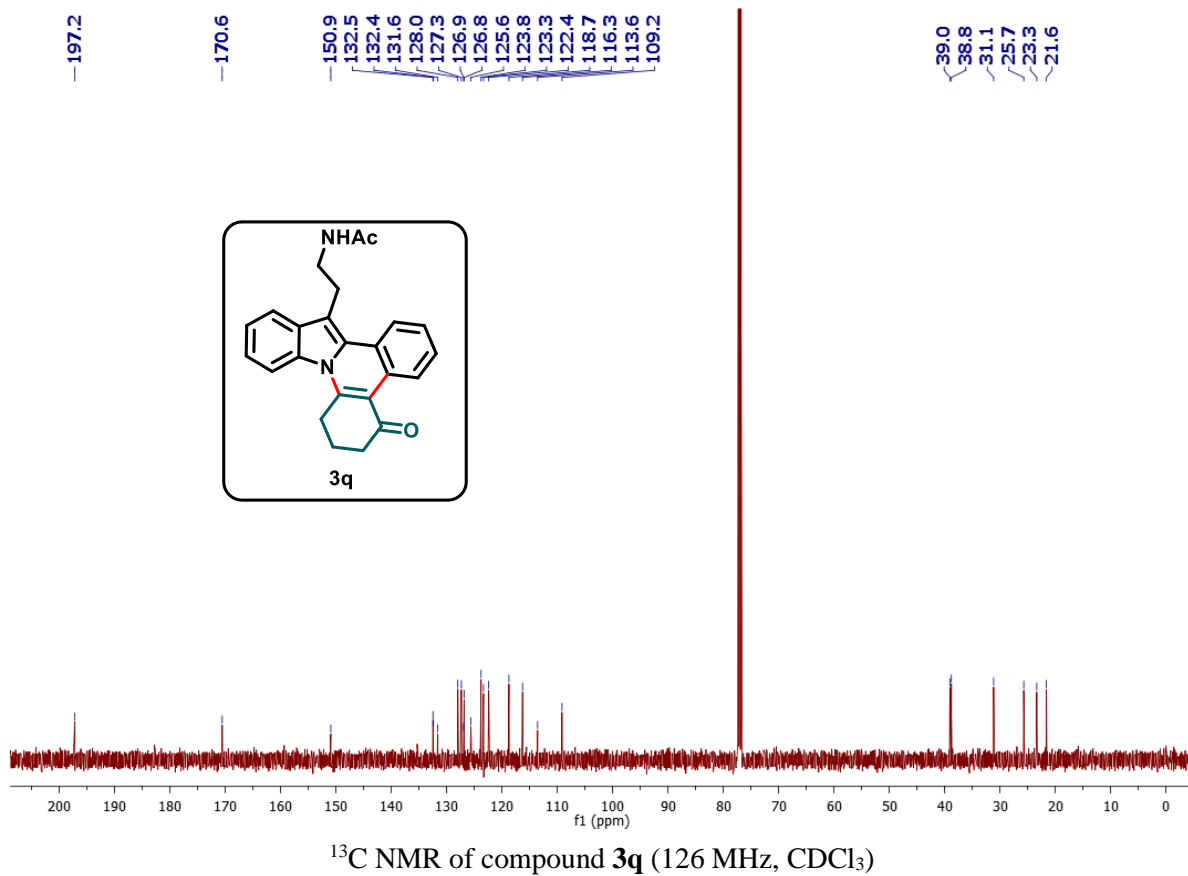

5-oxo-5,6,7,8-tetrahydroindolo[1,2-f]phenanthridine-14-carbaldehyde (**3r**):

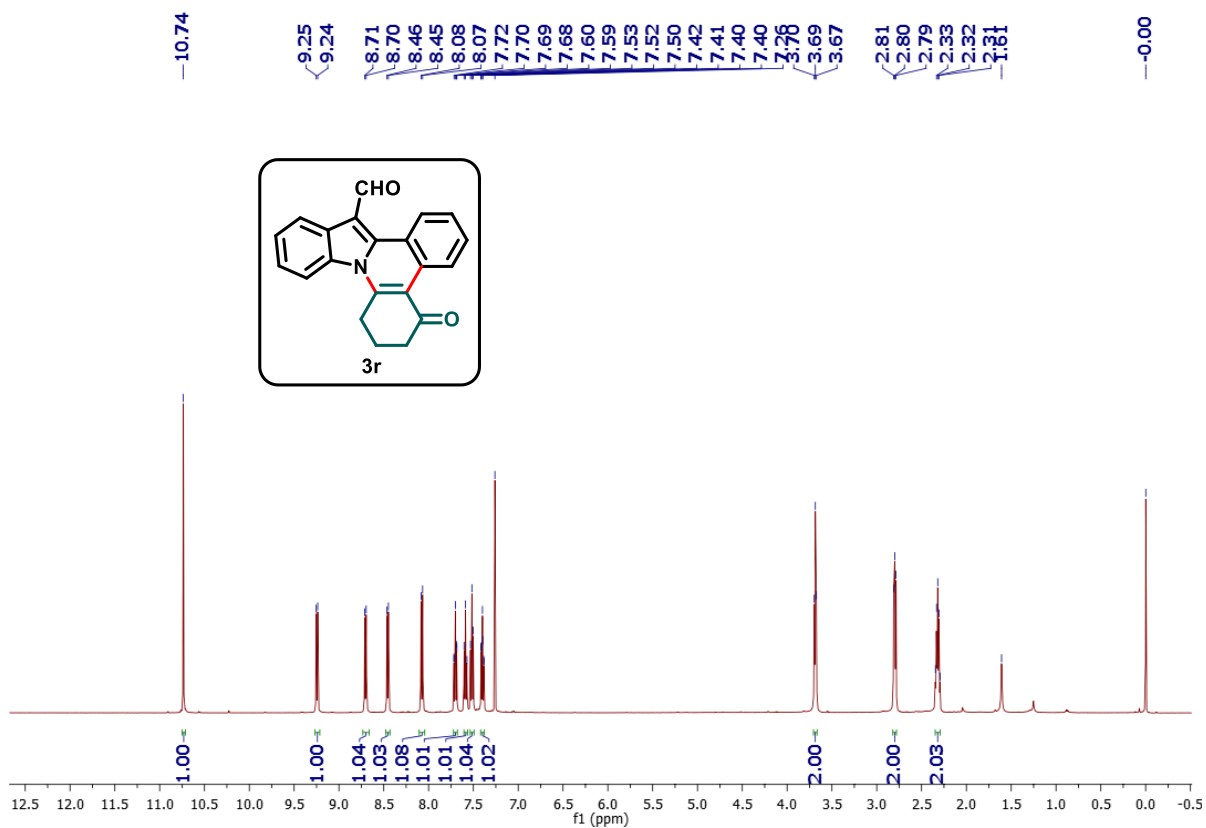

<sup>1</sup>H NMR of compound **3r** (500 MHz, CDCl<sub>3</sub>)

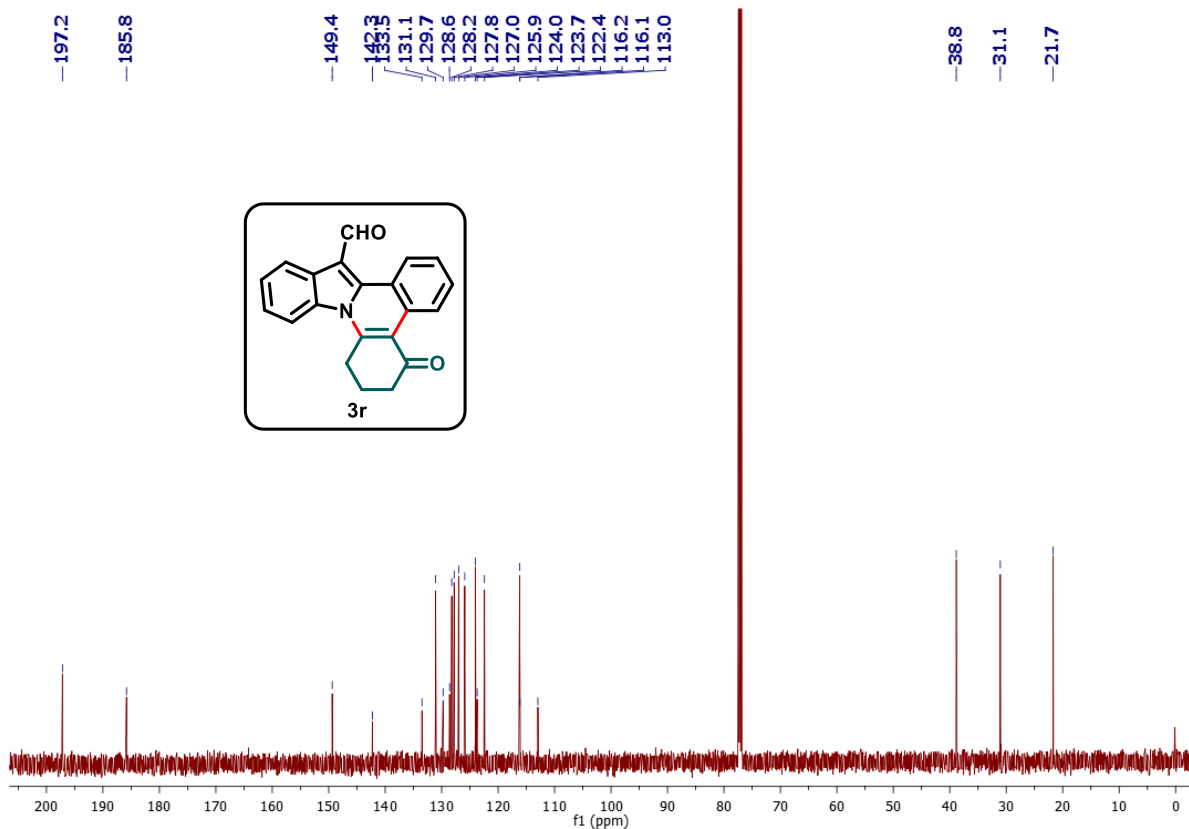

<sup>13</sup>C NMR of compound **3r** (126 MHz, CDCl<sub>3</sub>)

**13-methoxy-7,8-dihydroindolo[1,2-f]phenanthridin-5(6H)-one (3s):**

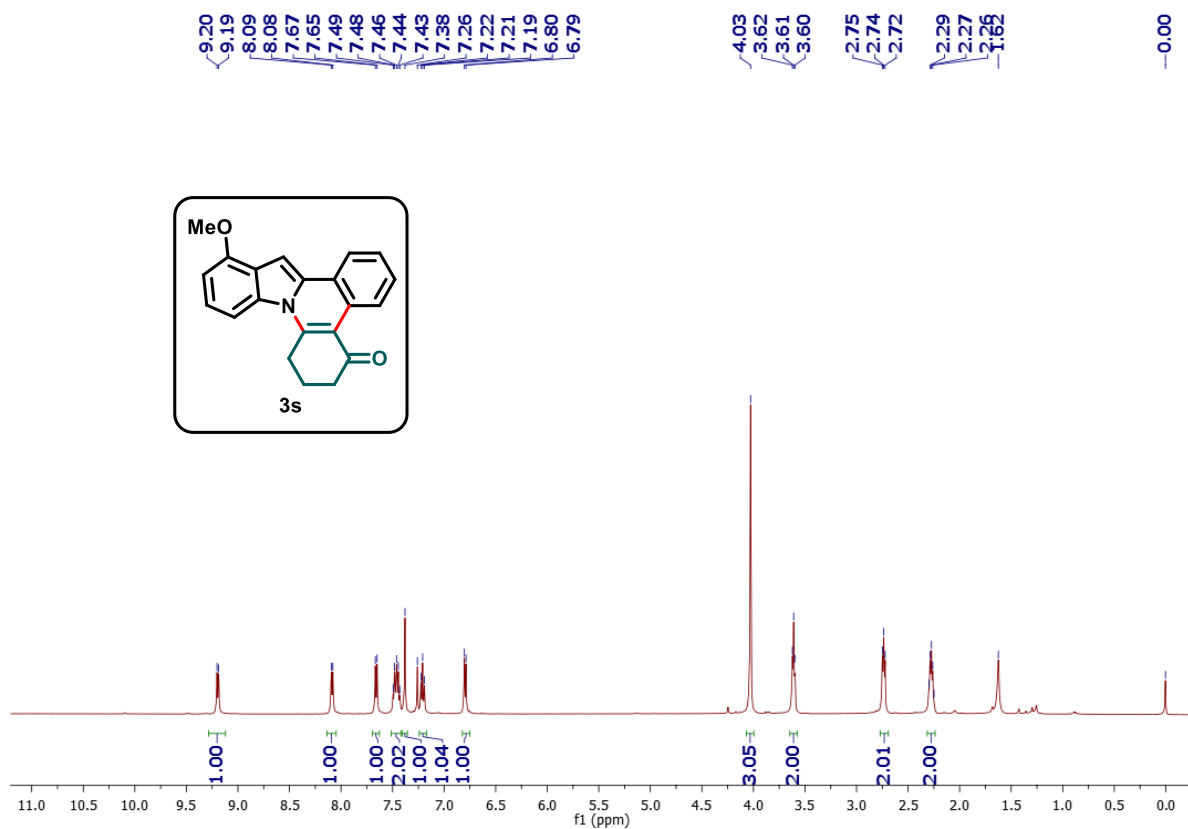

<sup>1</sup>H NMR of compound 3s (500 MHz, CDCl<sub>3</sub>)

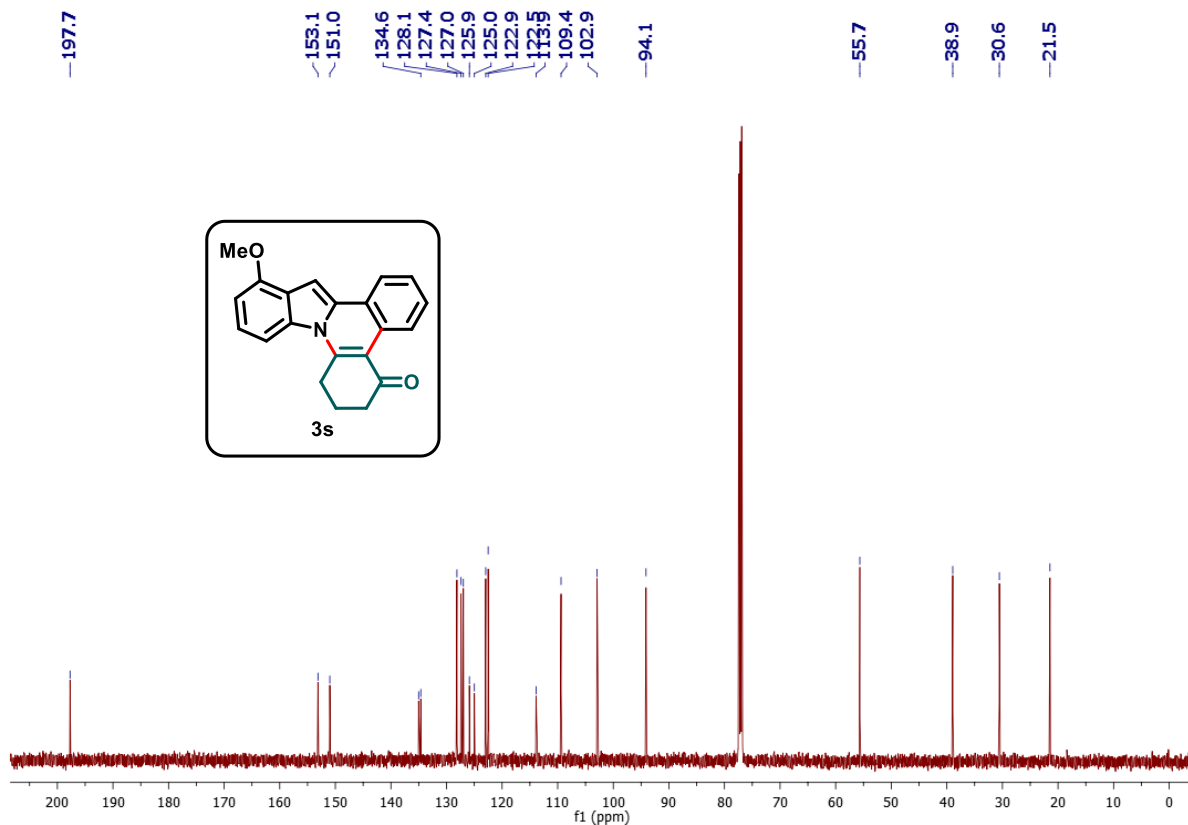

<sup>13</sup>C NMR of compound 3s (126 MHz, CDCl<sub>3</sub>)



**12-methyl-7,8-dihydroindolo[1,2-f]phenanthridin-5(6H)-one (3t):**

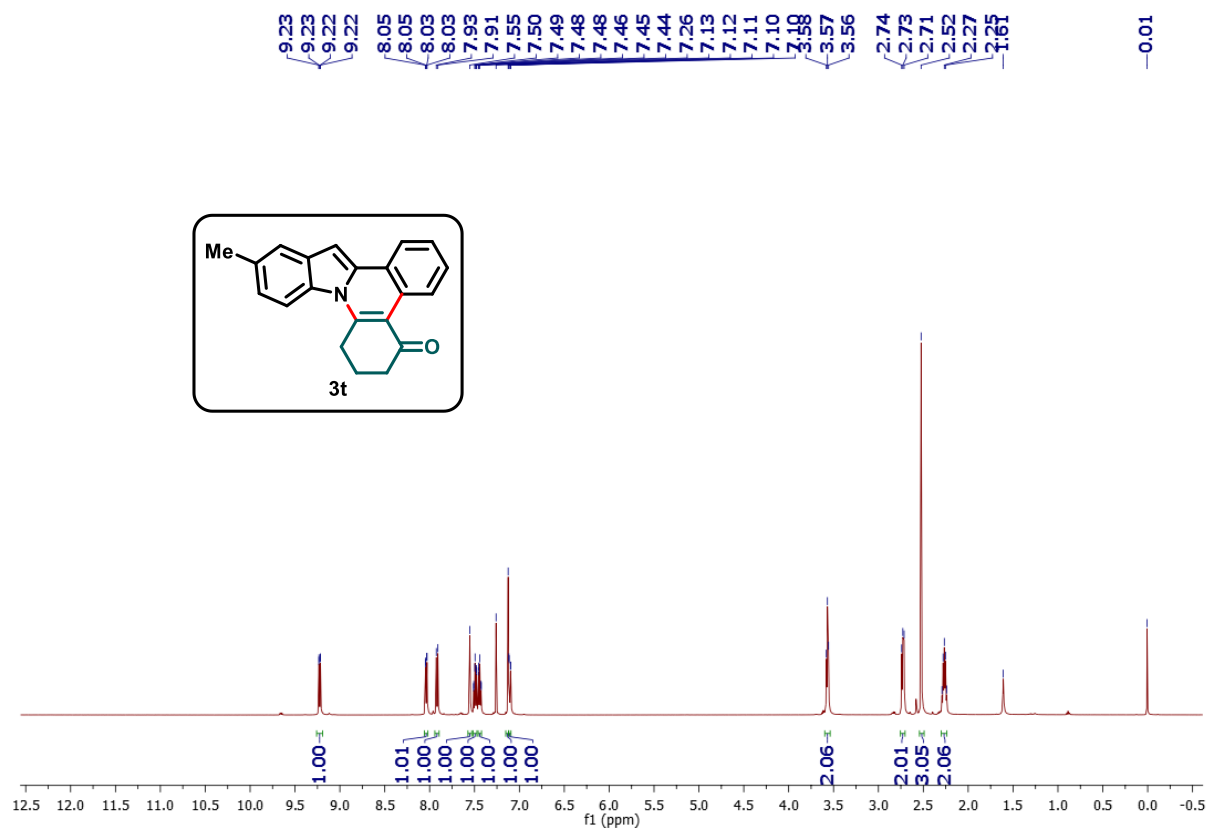

<sup>1</sup>H NMR of compound 3t (500 MHz, CDCl<sub>3</sub>)

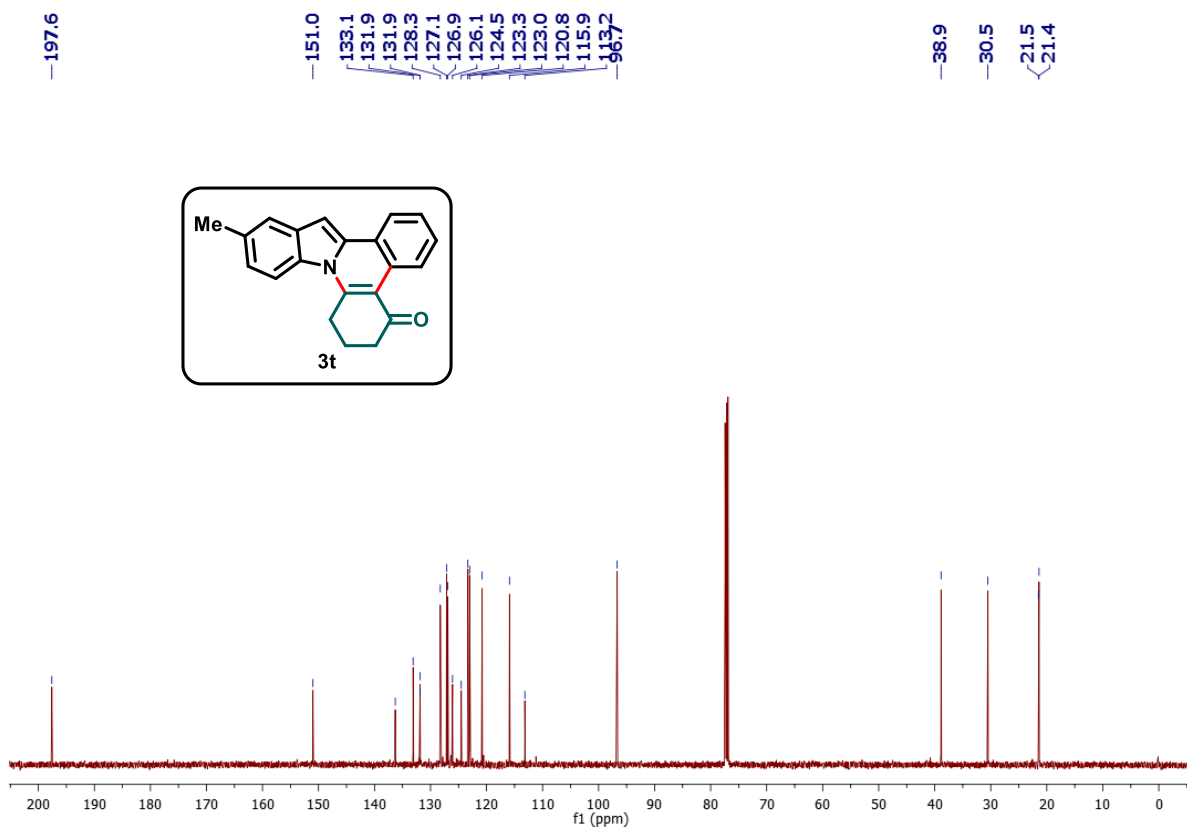

<sup>13</sup>C NMR of compound 3t (126 MHz, CDCl<sub>3</sub>)

12-methoxy-7,8-dihydroindolo[1,2-*f*]phenanthridin-5(6*H*)-one (**3u**):

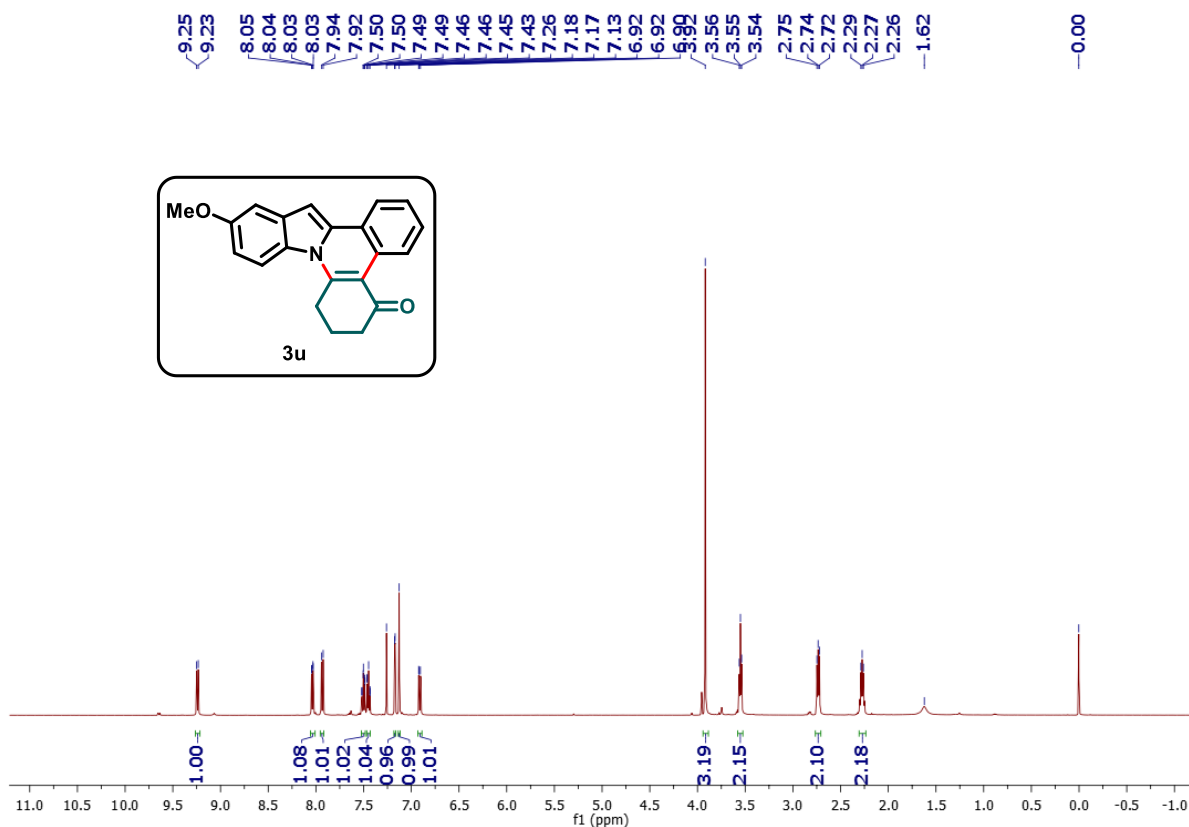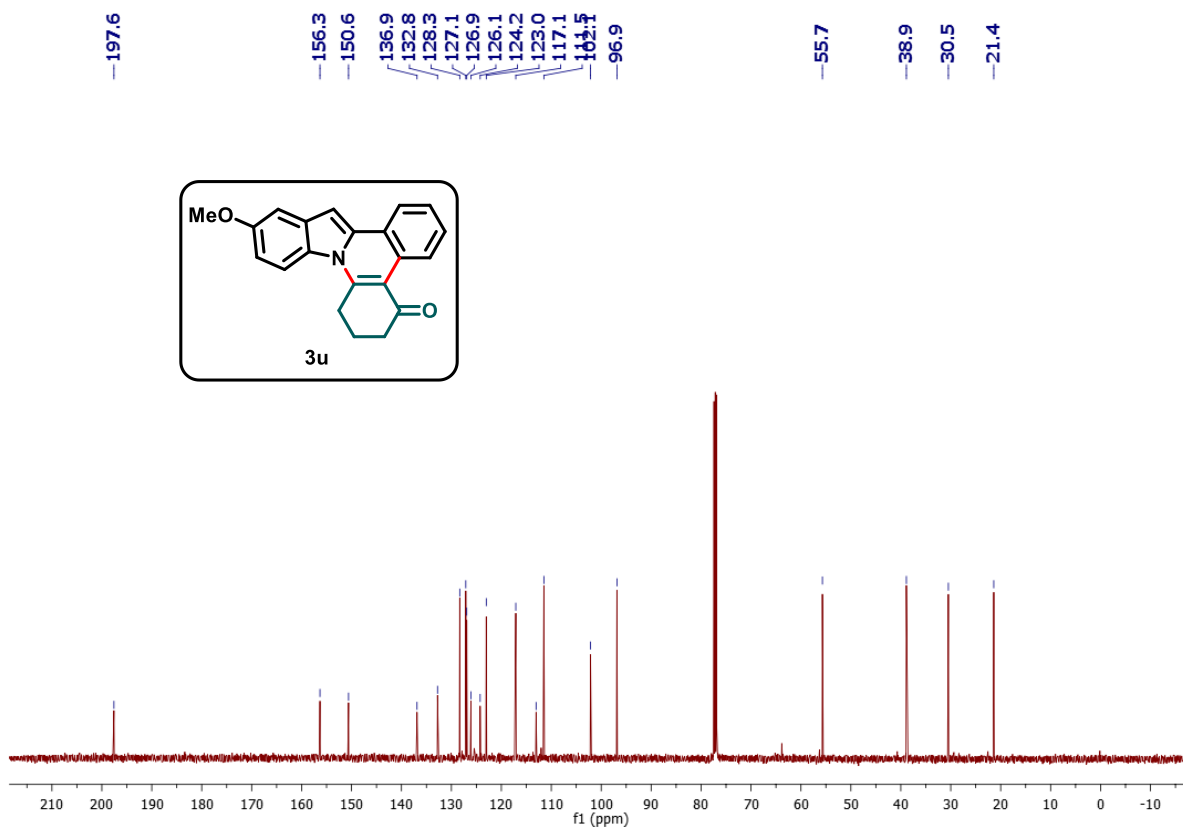

**12-fluoro-7,8-dihydroindolo[1,2-*f*]phenanthridin-5(6*H*)-one (3v):**

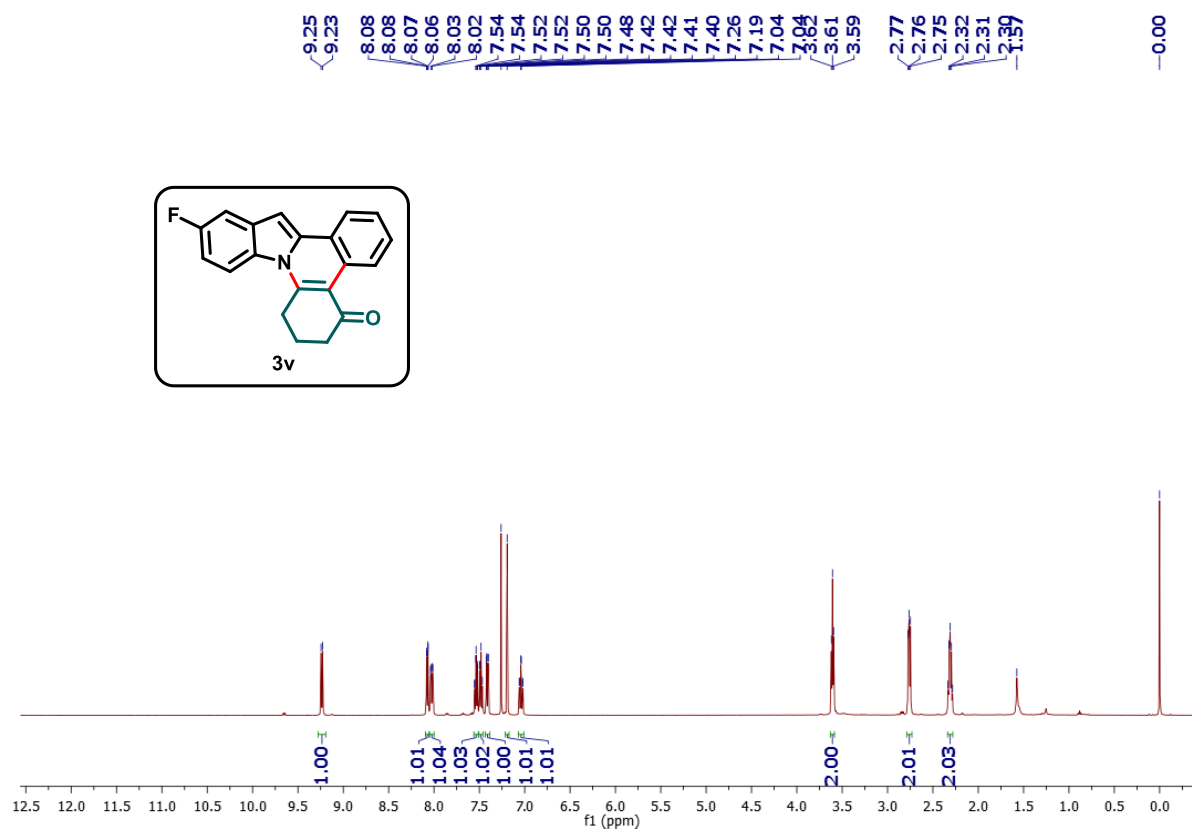

<sup>1</sup>H NMR of compound 3v (500 MHz, CDCl<sub>3</sub>)

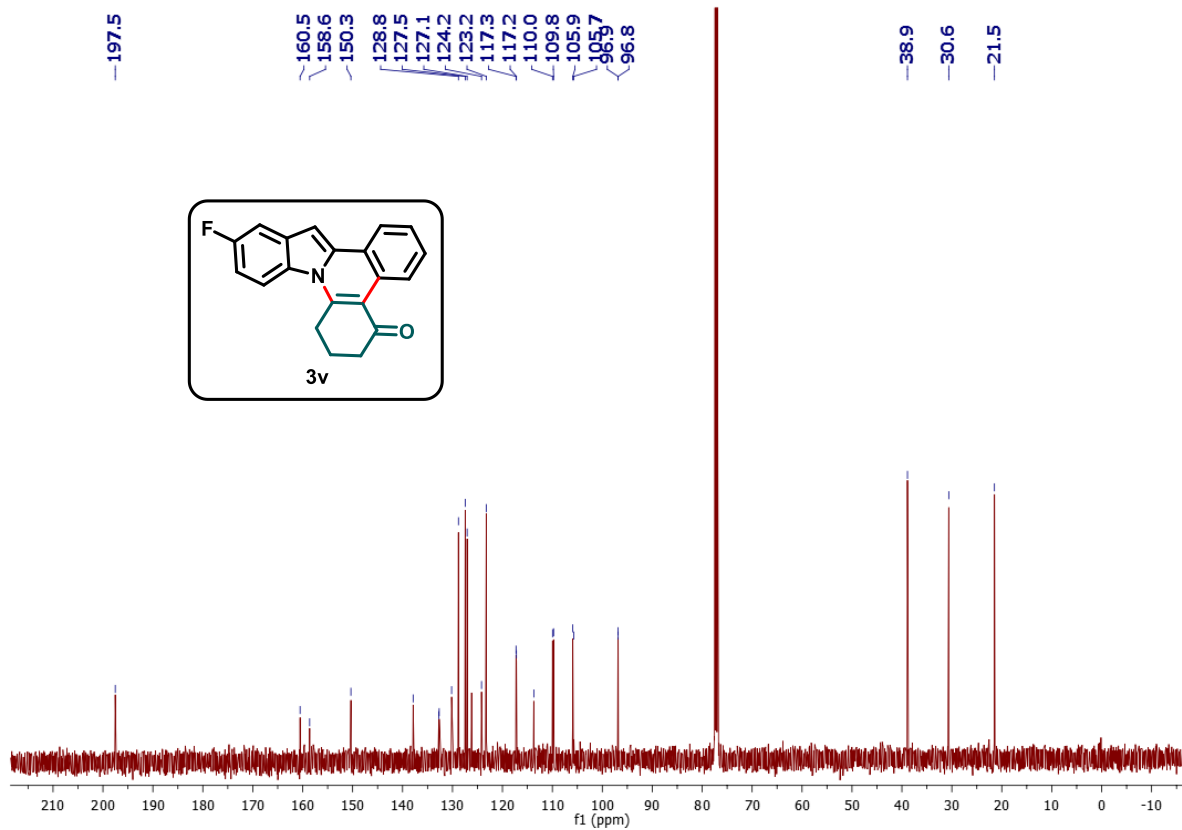

<sup>13</sup>C NMR of compound 3v (126 MHz, CDCl<sub>3</sub>)

--119.20

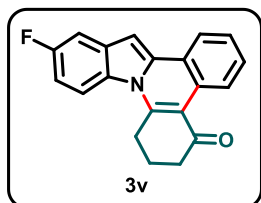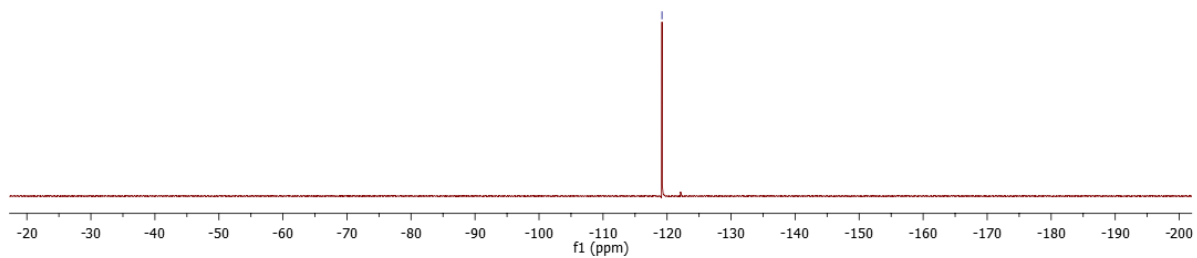

$^{19}\text{F}$  NMR of compound **3v** (470 MHz,  $\text{CDCl}_3$ )

5-oxo-5,6,7,8-tetrahydroindolo[1,2-f]phenanthridine-12-carbonitrile (**3w**):

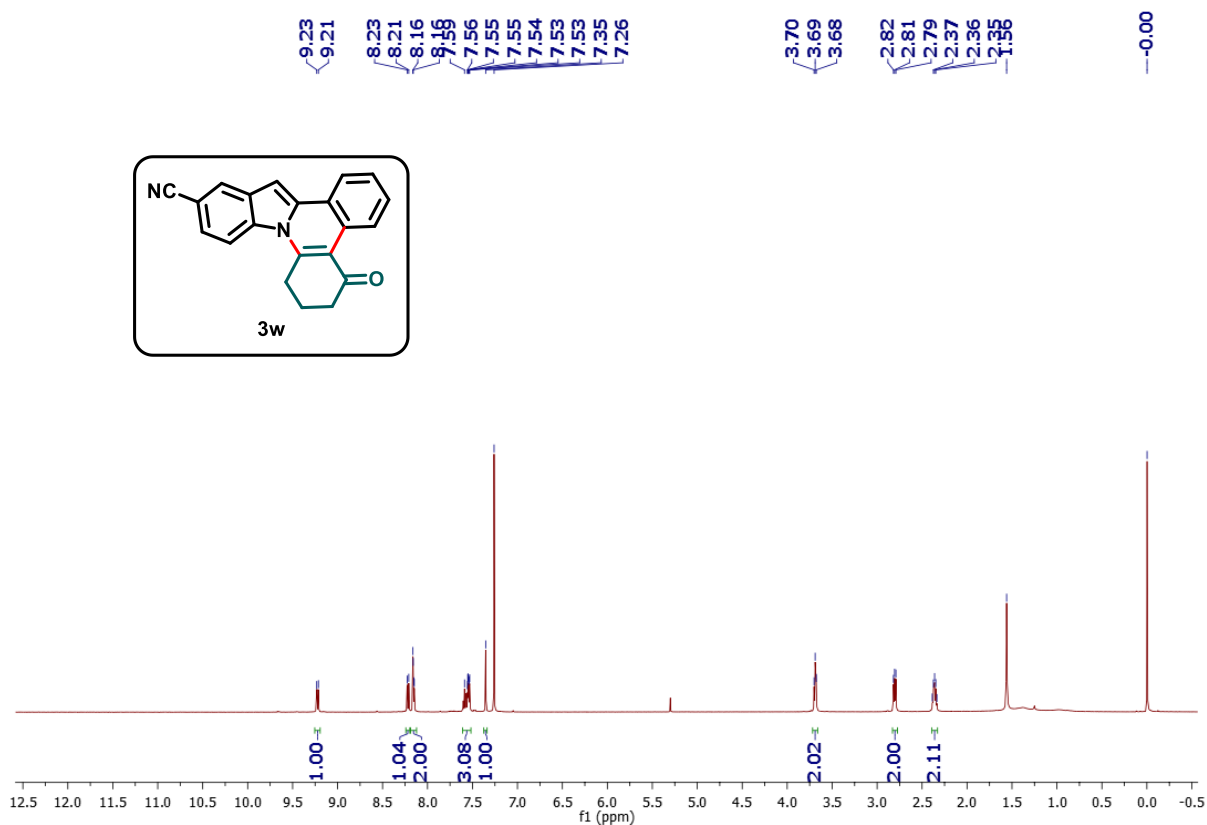

<sup>1</sup>H NMR of compound **3w** (500 MHz, CDCl<sub>3</sub>)

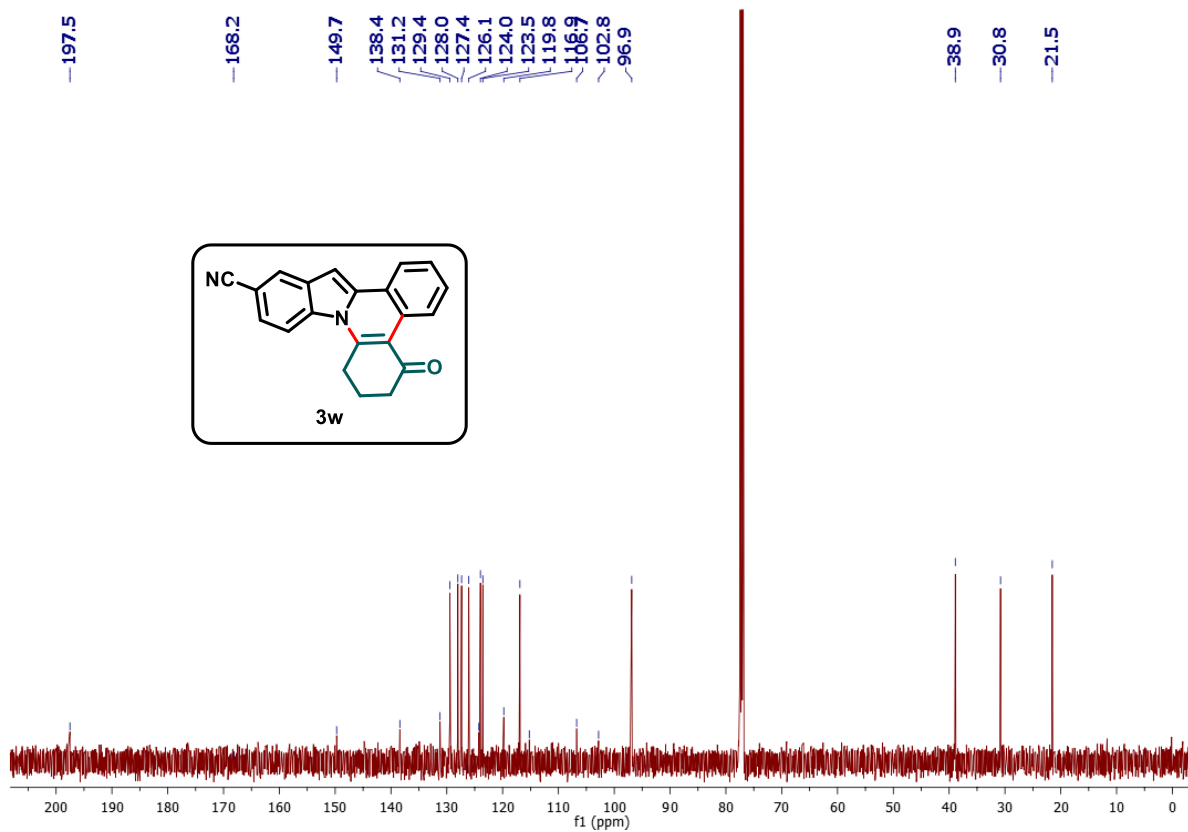

<sup>13</sup>C NMR of compound **3w** (126 MHz, CDCl<sub>3</sub>)

**11-chloro-7,8-dihydroindolo[1,2-*f*]phenanthridin-5(6*H*)-one (3x):**

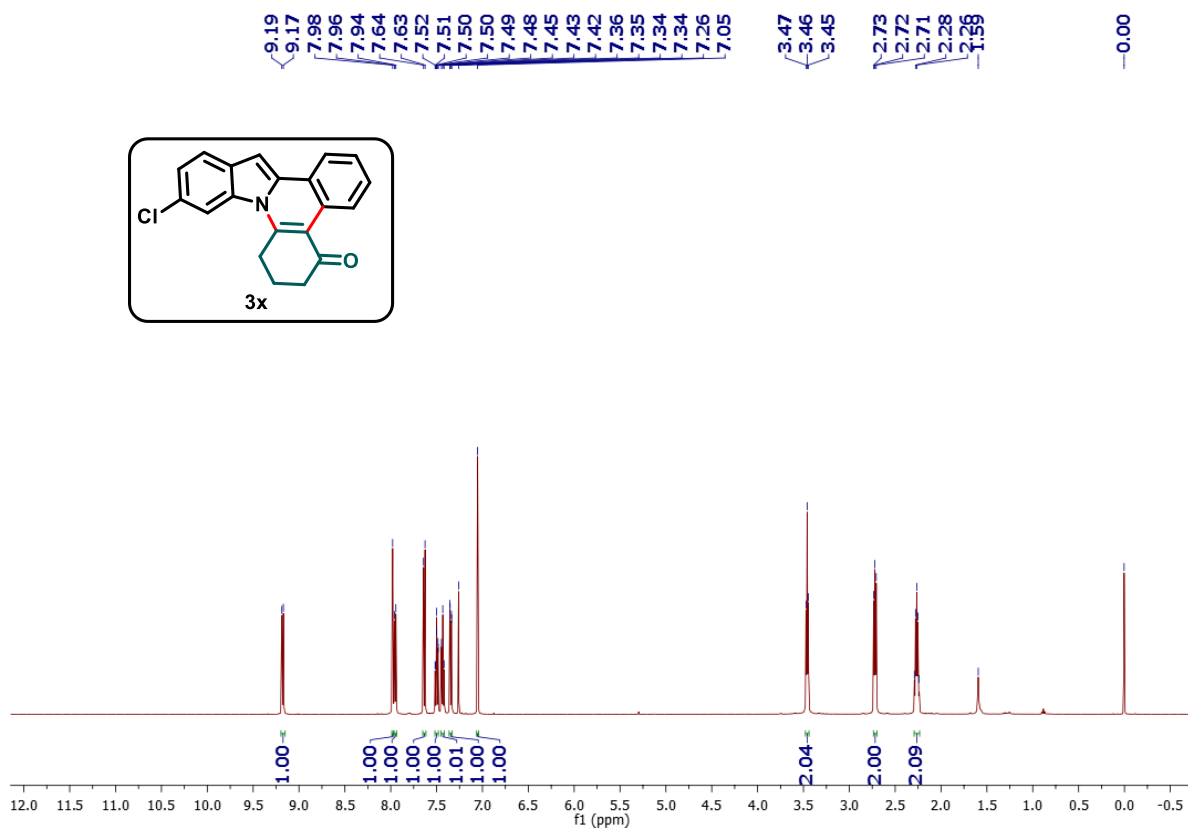

<sup>1</sup>H NMR of compound 3x (500 MHz, CDCl<sub>3</sub>)

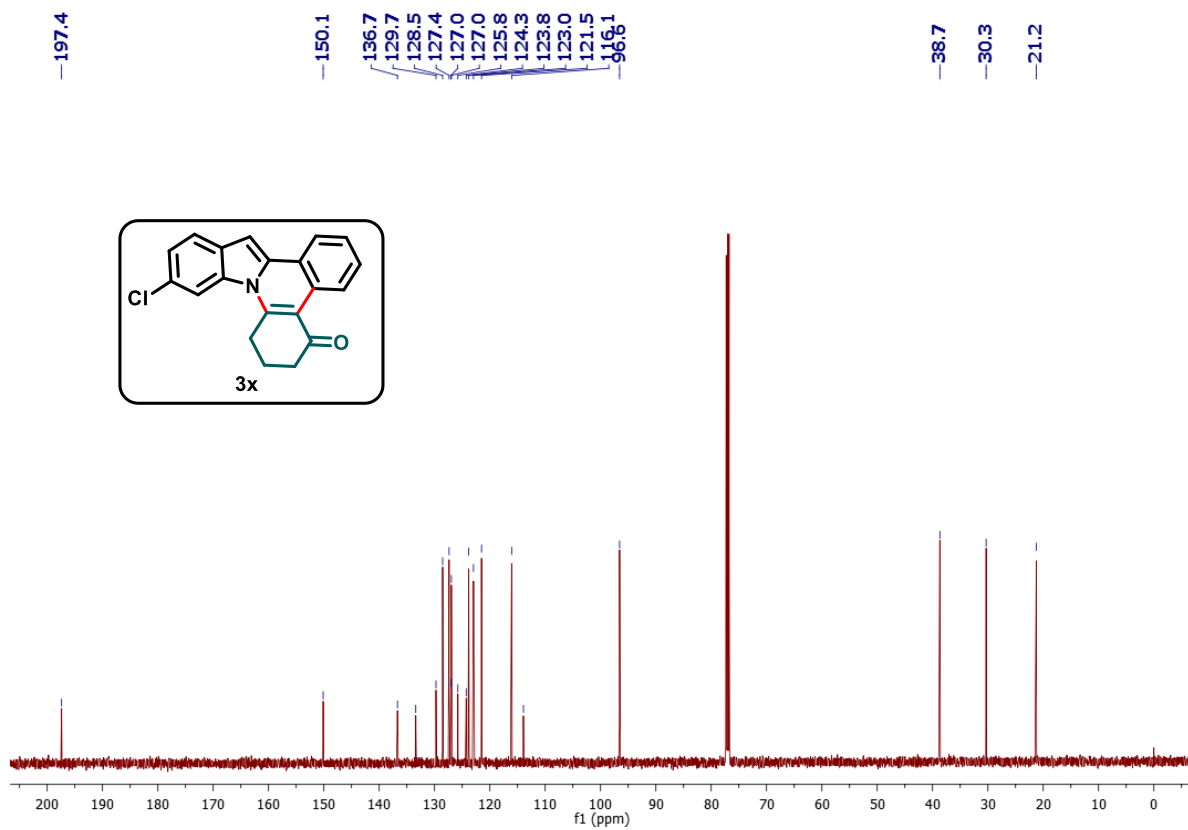

<sup>13</sup>C NMR of compound 3x (126 MHz, CDCl<sub>3</sub>)

11-phenyl-7,8-dihydroindolo[1,2-*f*]phenanthridin-5(6*H*)-one (**3y**):

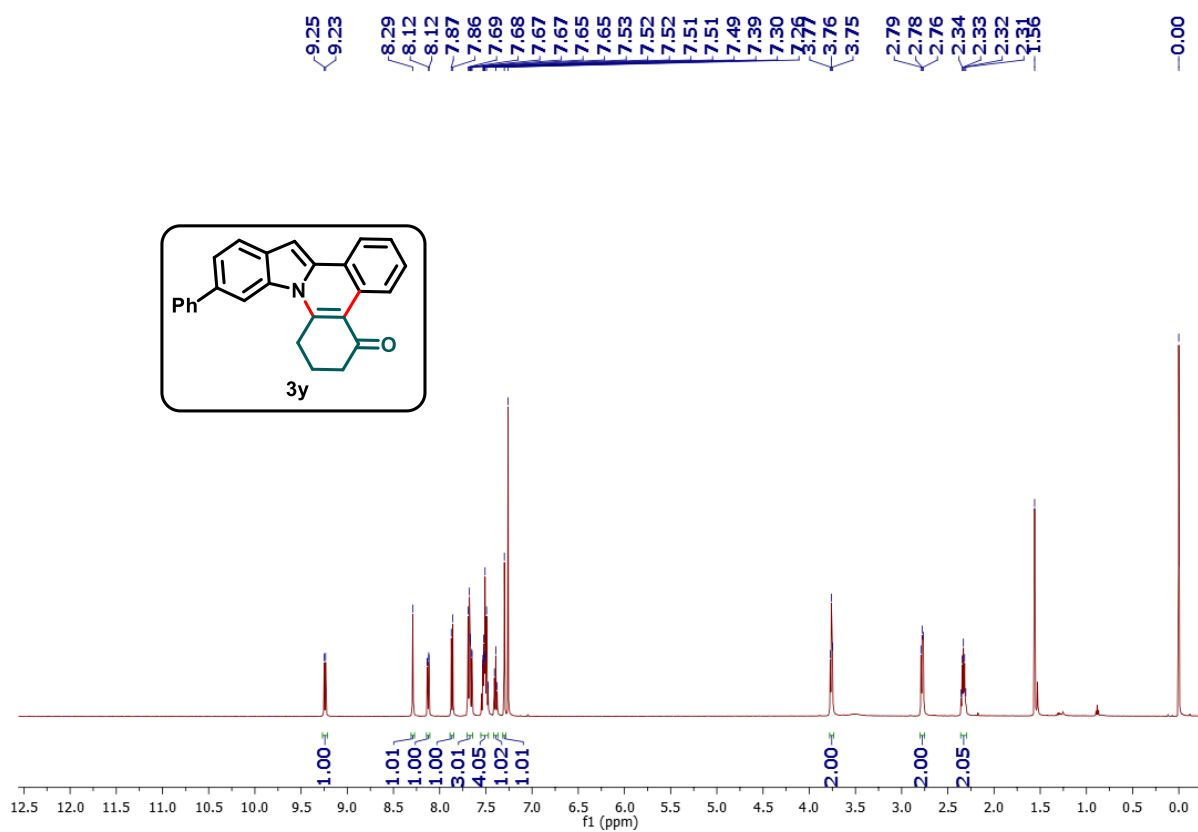

<sup>1</sup>H NMR of compound **3y** (500 MHz, CDCl<sub>3</sub>)

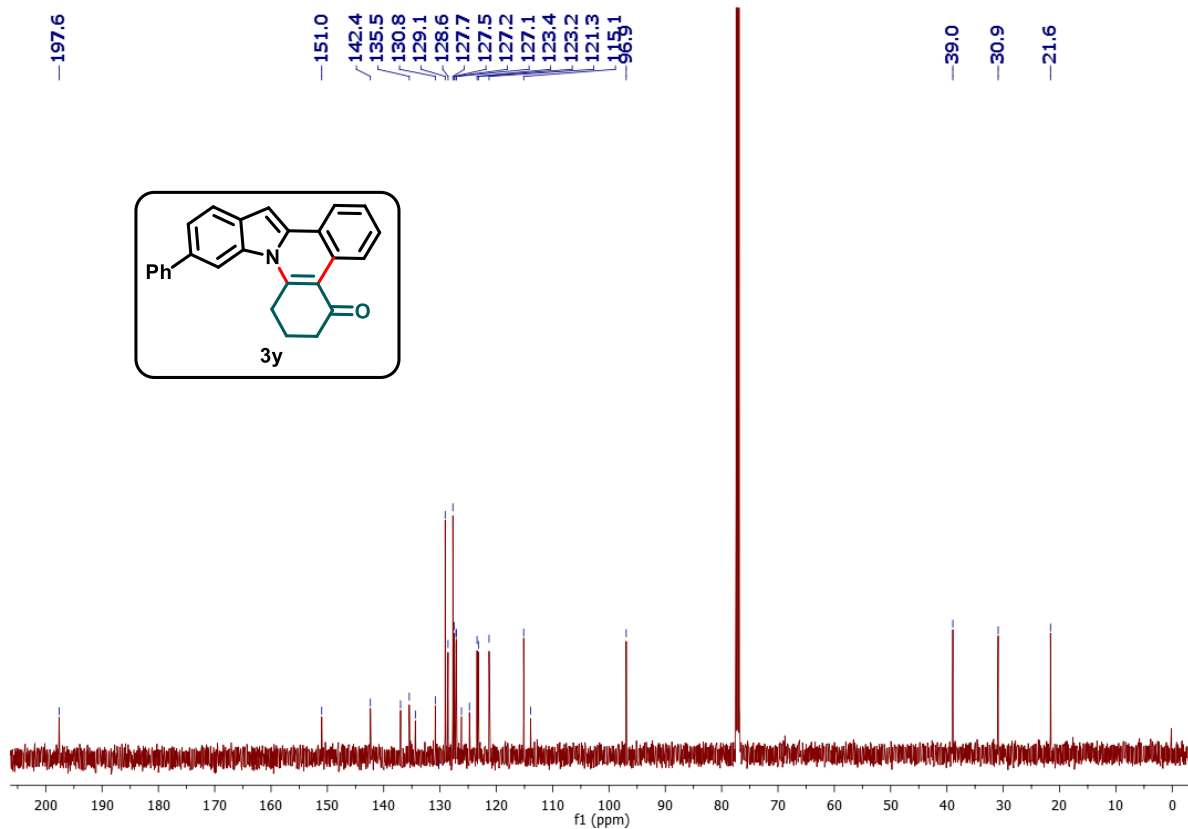

<sup>13</sup>C NMR of compound **3y** (126 MHz, CDCl<sub>3</sub>)

**6-methyl-7,8-dihydroindolo[1,2-f]phenanthridin-5(6H)-one (3z):**

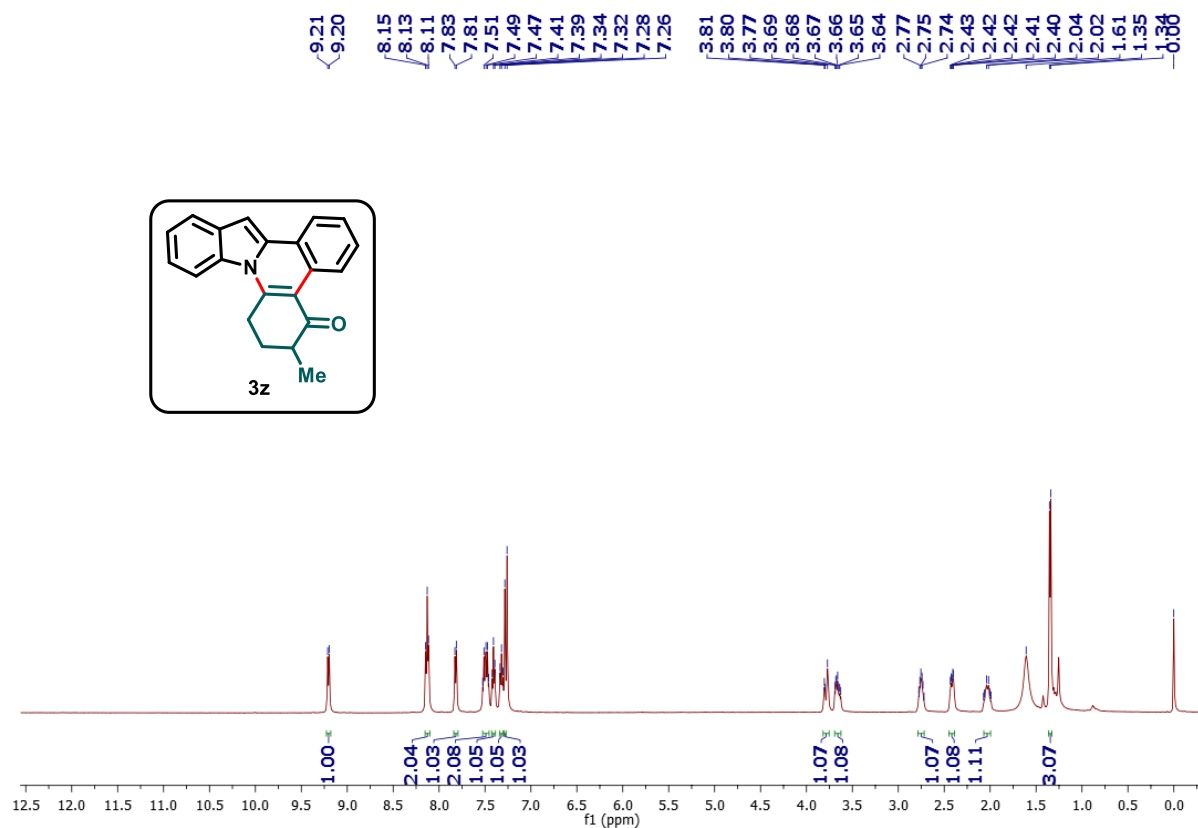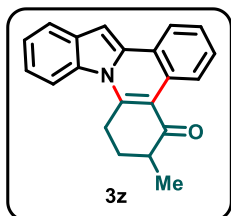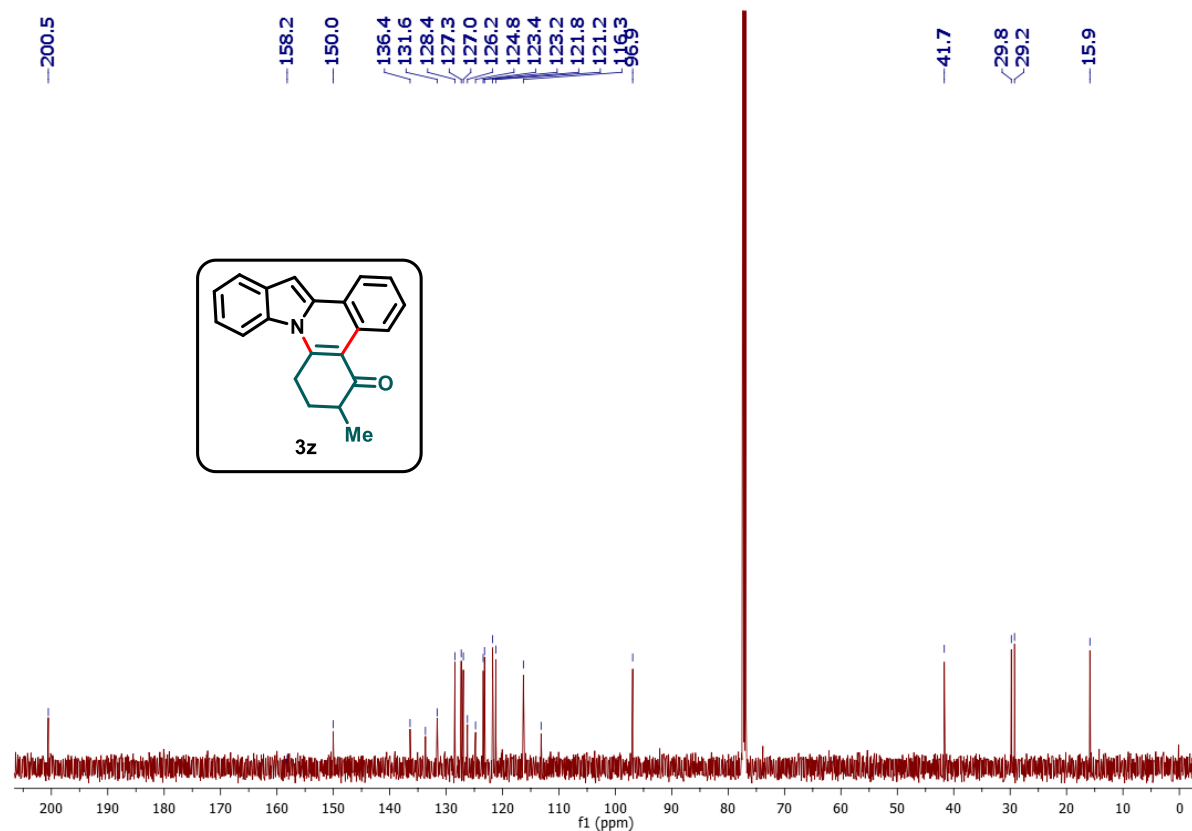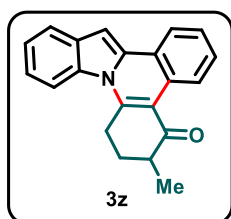



**7-methyl-7,8-dihydroindolo[1,2-*f*]phenanthridin-5(6*H*)-one (3aa):**

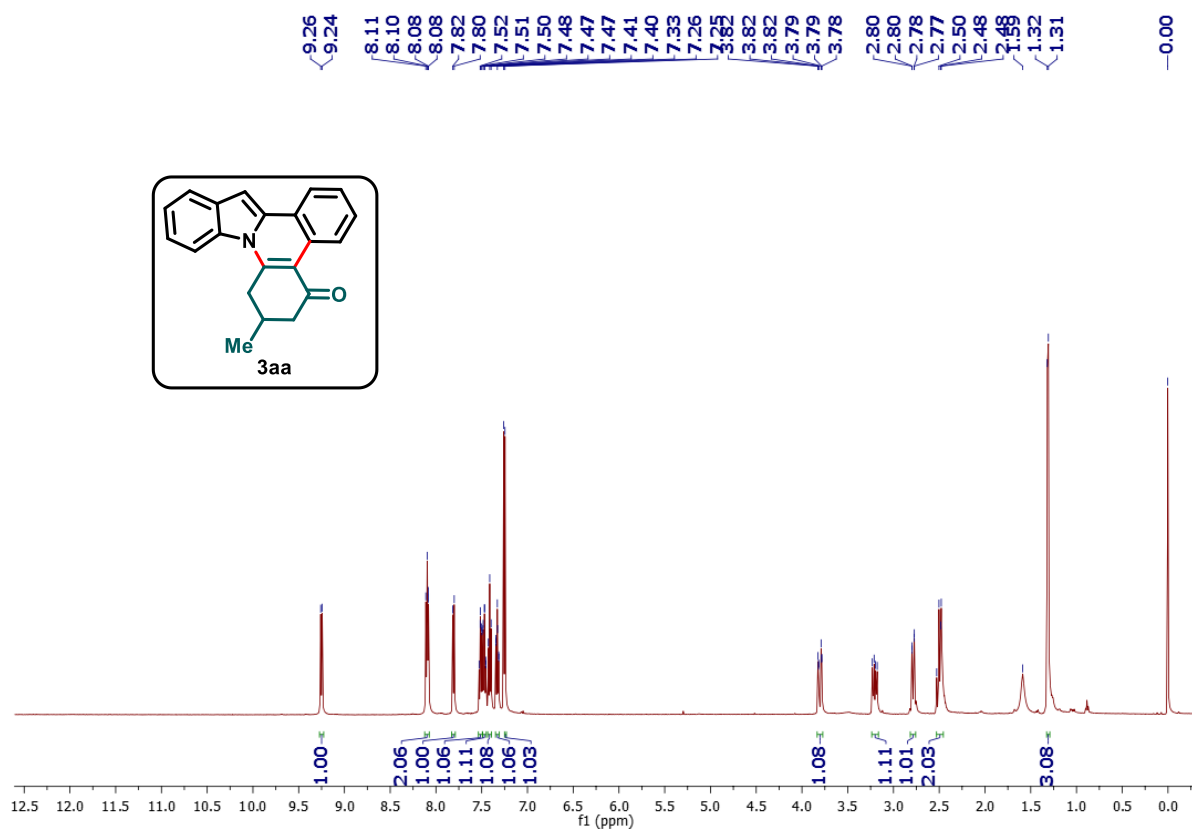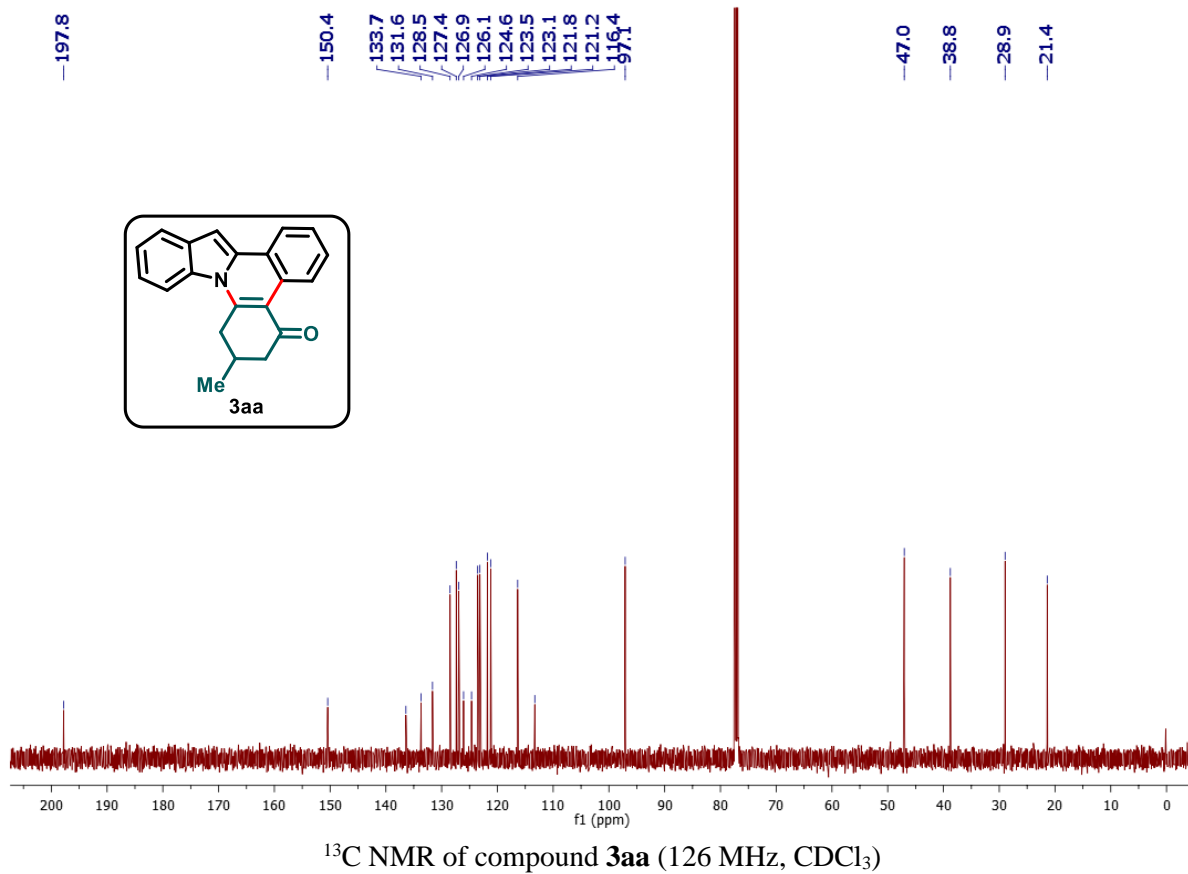

**7,7-dimethyl-7,8-dihydroindolo[1,2-f]phenanthridin-5(6H)-one (3ab):**

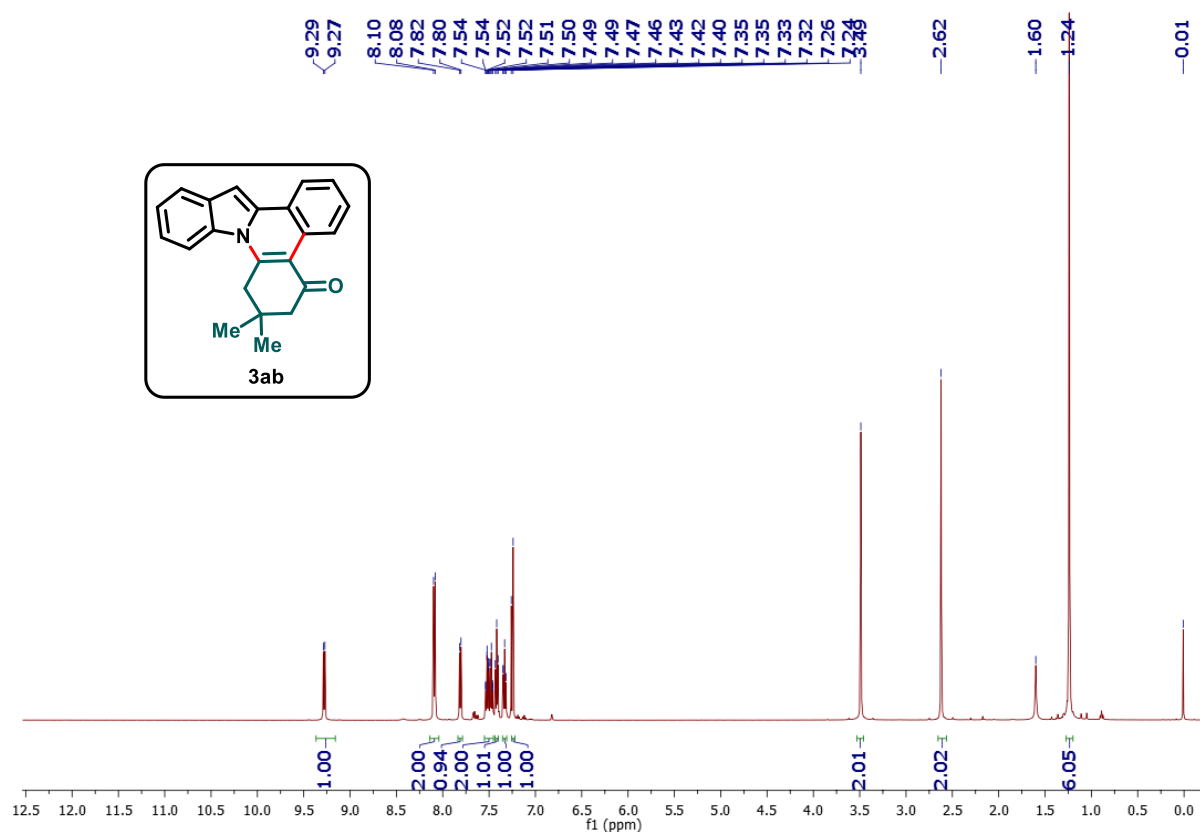

<sup>1</sup>H NMR of compound **3ab** (500 MHz, CDCl<sub>3</sub>)

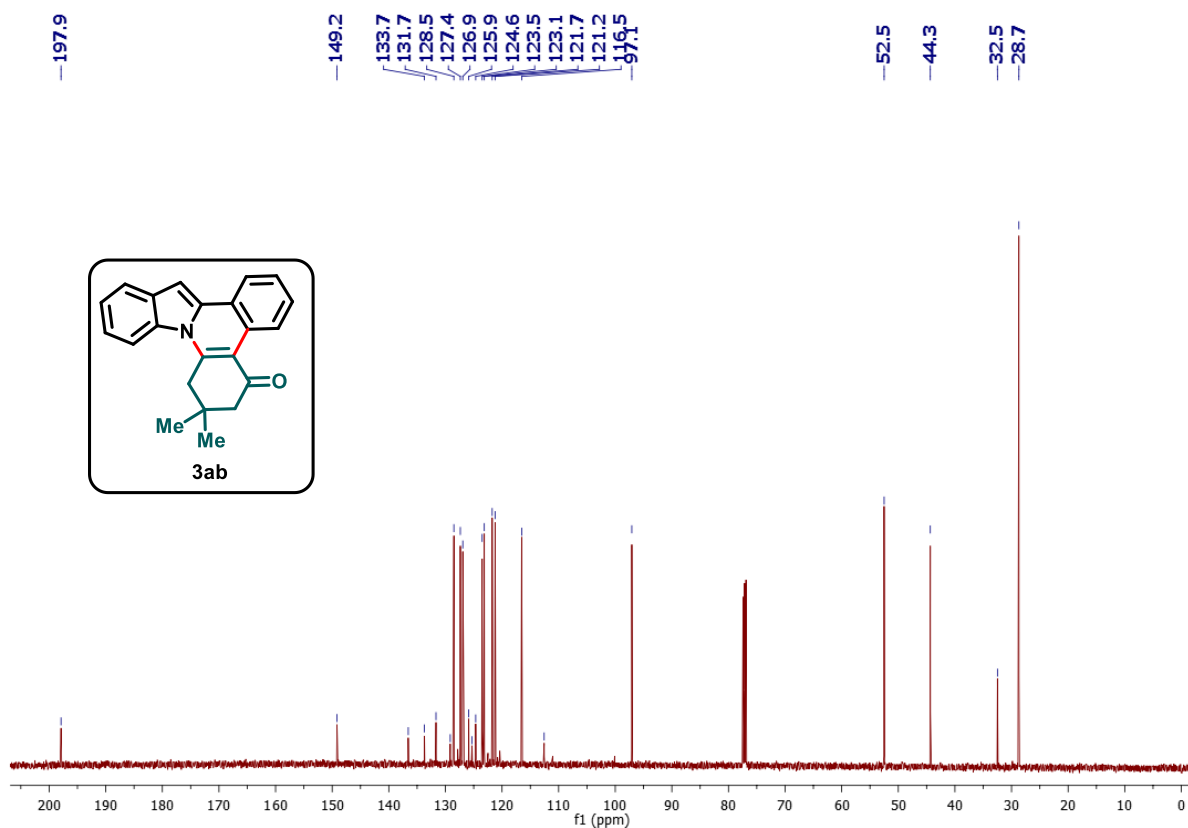

<sup>13</sup>C NMR of compound **3ab** (126 MHz, CDCl<sub>3</sub>)

**7-pentyl-7,8-dihydroindolo[1,2-f]phenanthridin-5(6H)-one (3ac):**

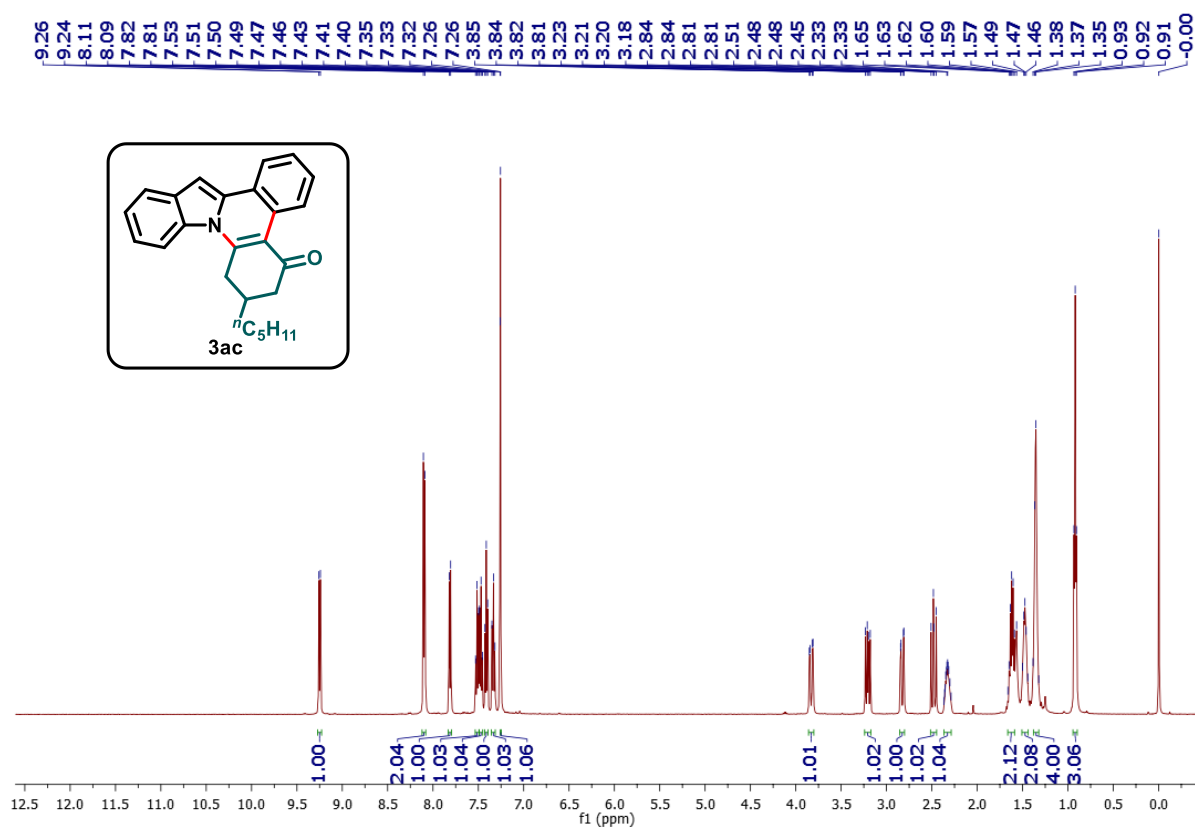

<sup>1</sup>H NMR of compound **3ac** (500 MHz, CDCl<sub>3</sub>)

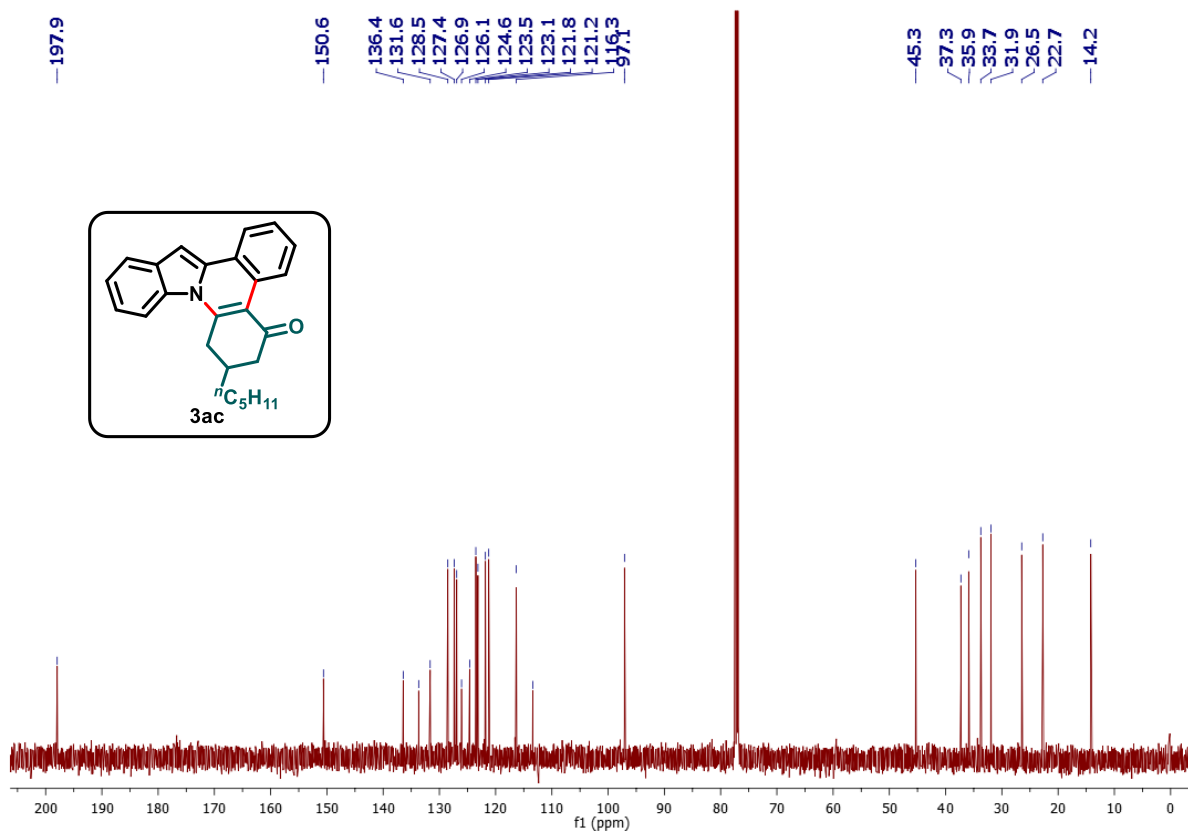

<sup>13</sup>C NMR of compound **3ac** (126 MHz, CDCl<sub>3</sub>)

**7-phenyl-7,8-dihydroindolo[1,2-f]phenanthridin-5(6H)-one (3ae):**

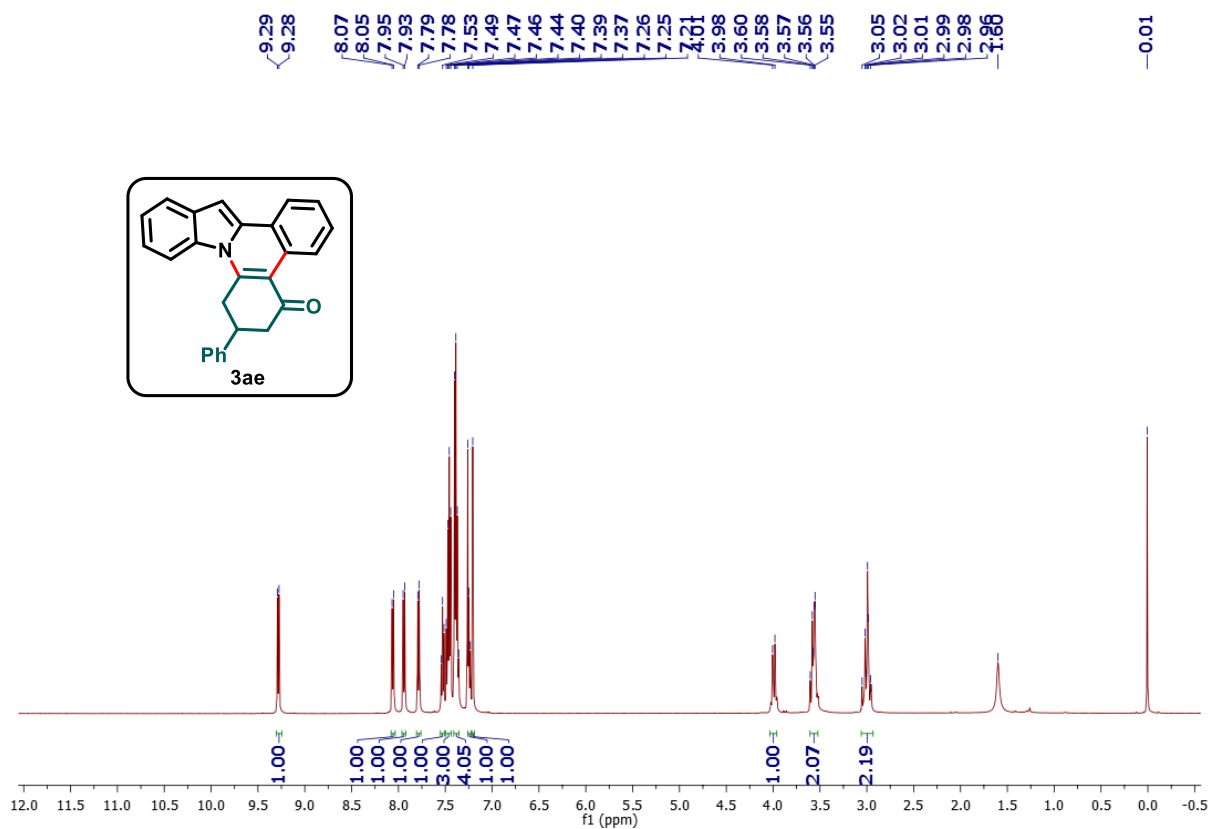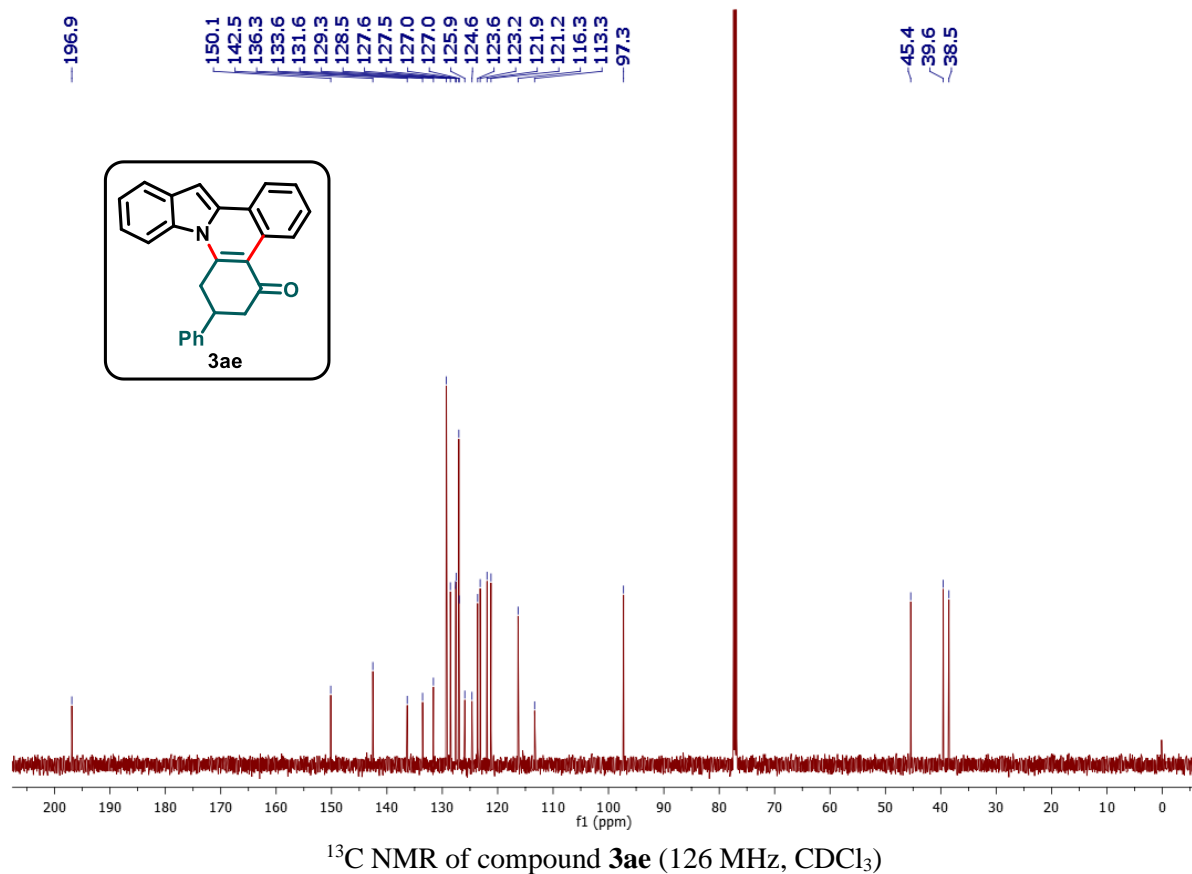

7-(*p*-tolyl)-7,8-dihydroindolo[1,2-*f*]phenanthridin-5(6*H*)-one (3af):

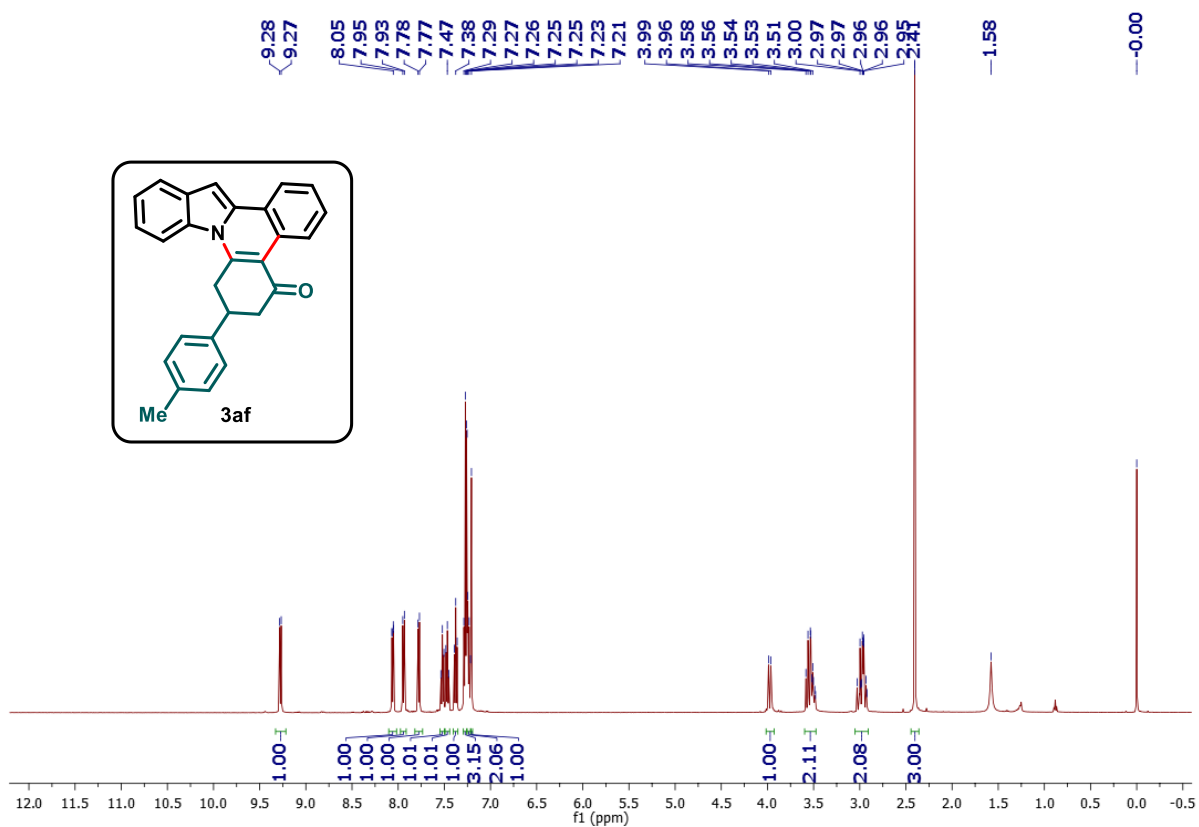

<sup>1</sup>H NMR of compound 3af (500 MHz, CDCl<sub>3</sub>)

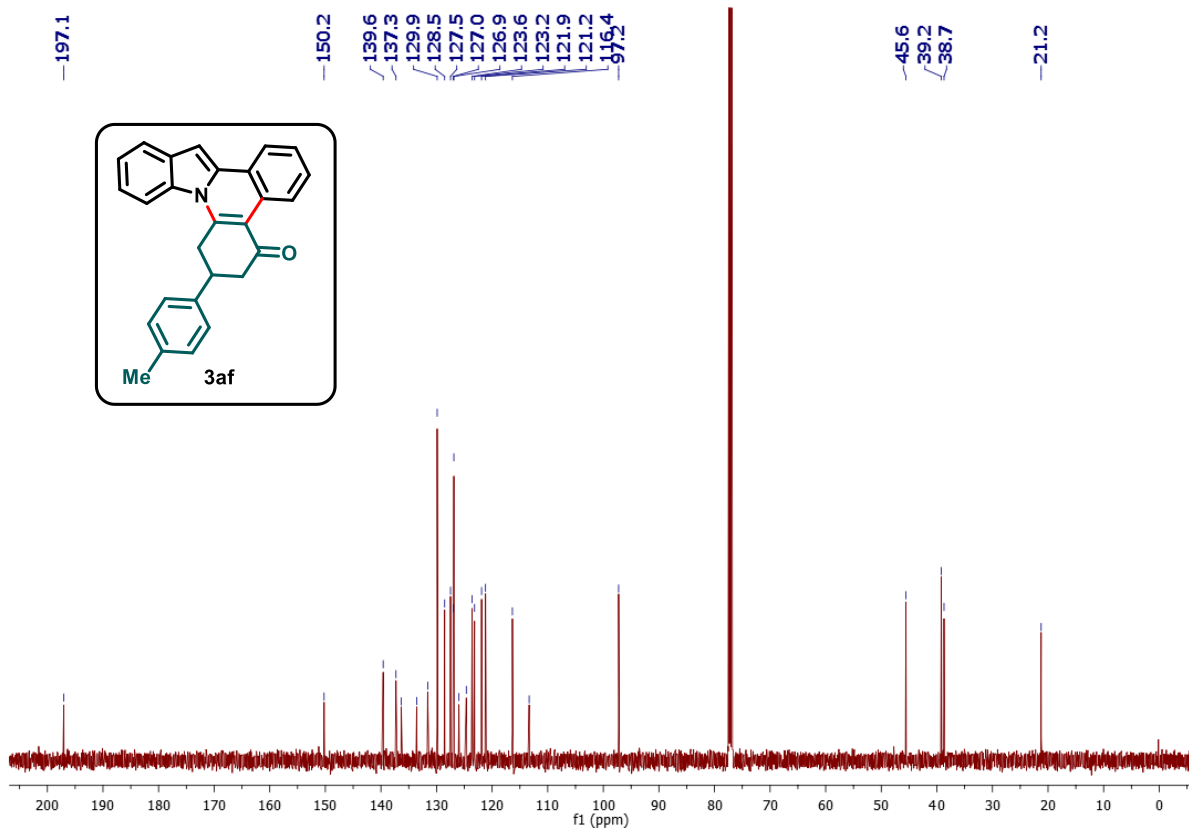

<sup>13</sup>C NMR of compound 3af (126 MHz, CDCl<sub>3</sub>)

**7-(4-methoxyphenyl)-7,8-dihydroindolo[1,2-f]phenanthridin-5(6H)-one (3ag):**

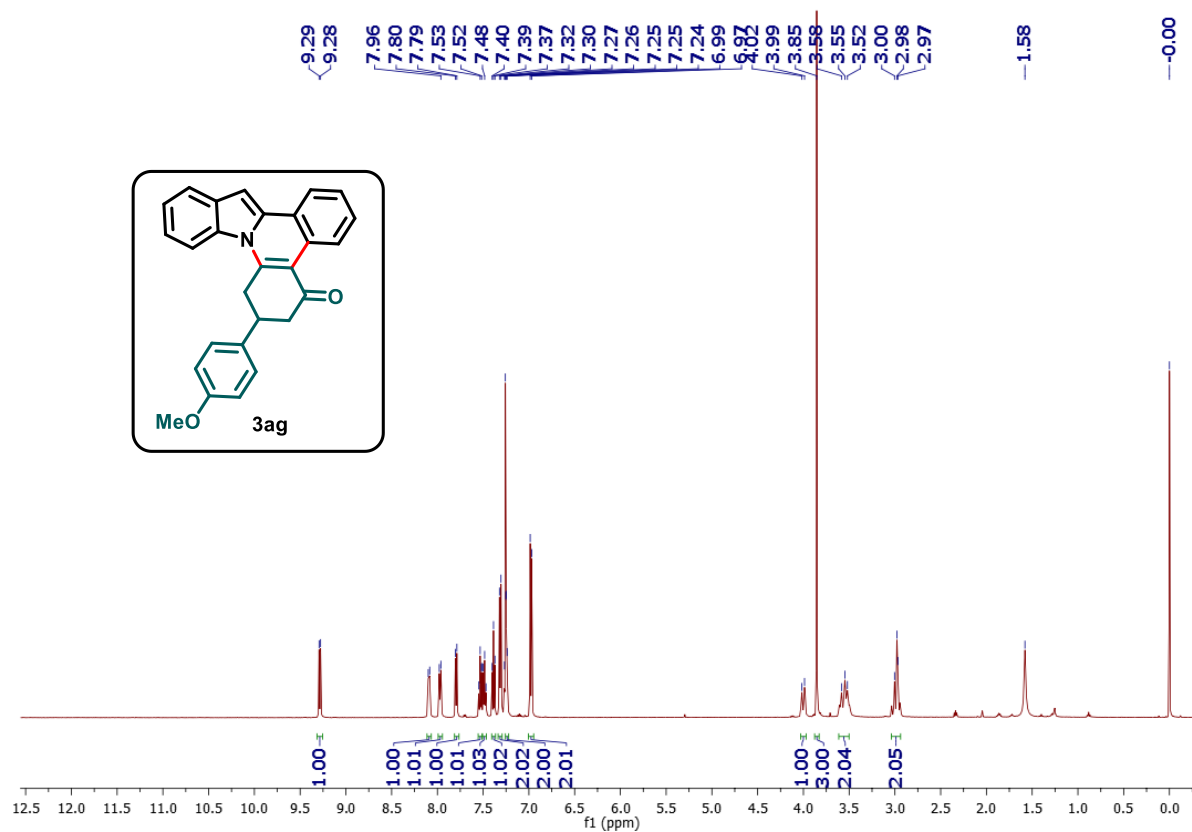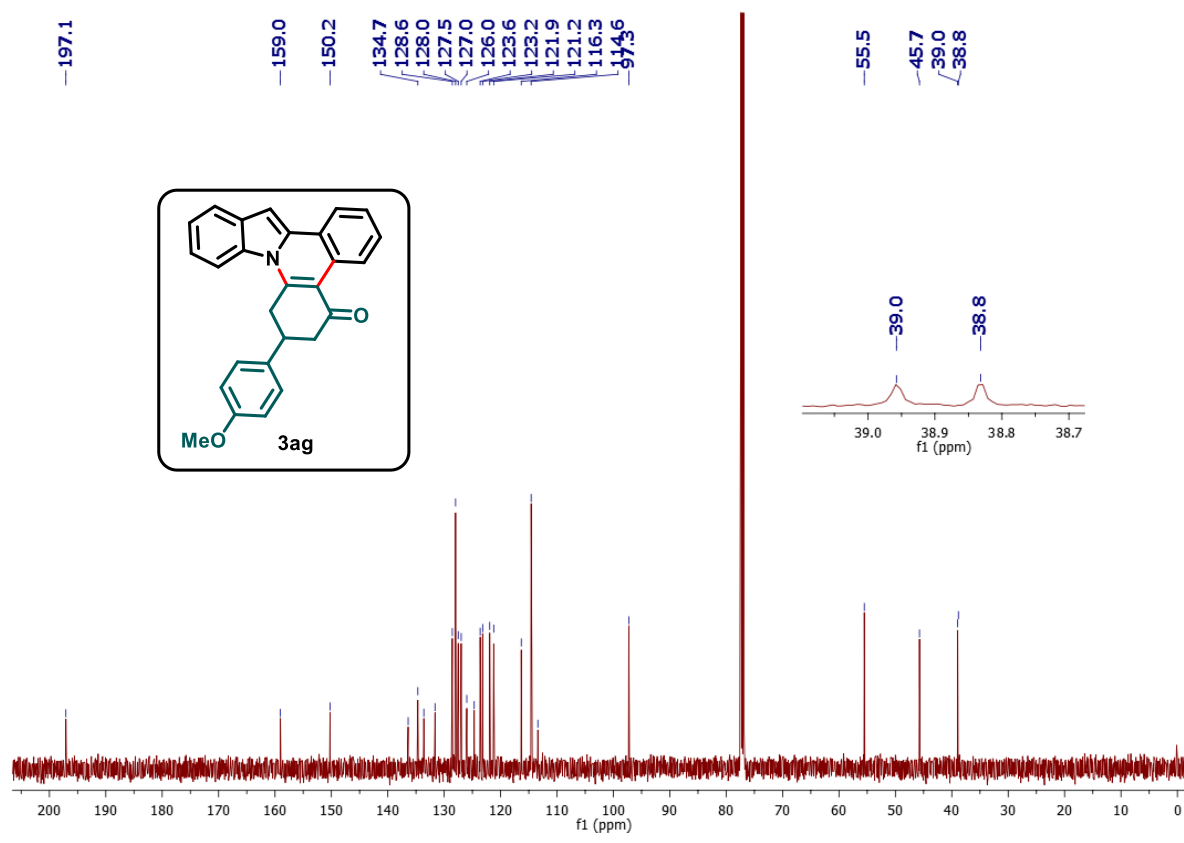

**7-(4-isopropylphenyl)-7,8-dihydroindolo[1,2-*f*]phenanthridin-5(6*H*)-one (3ah):**

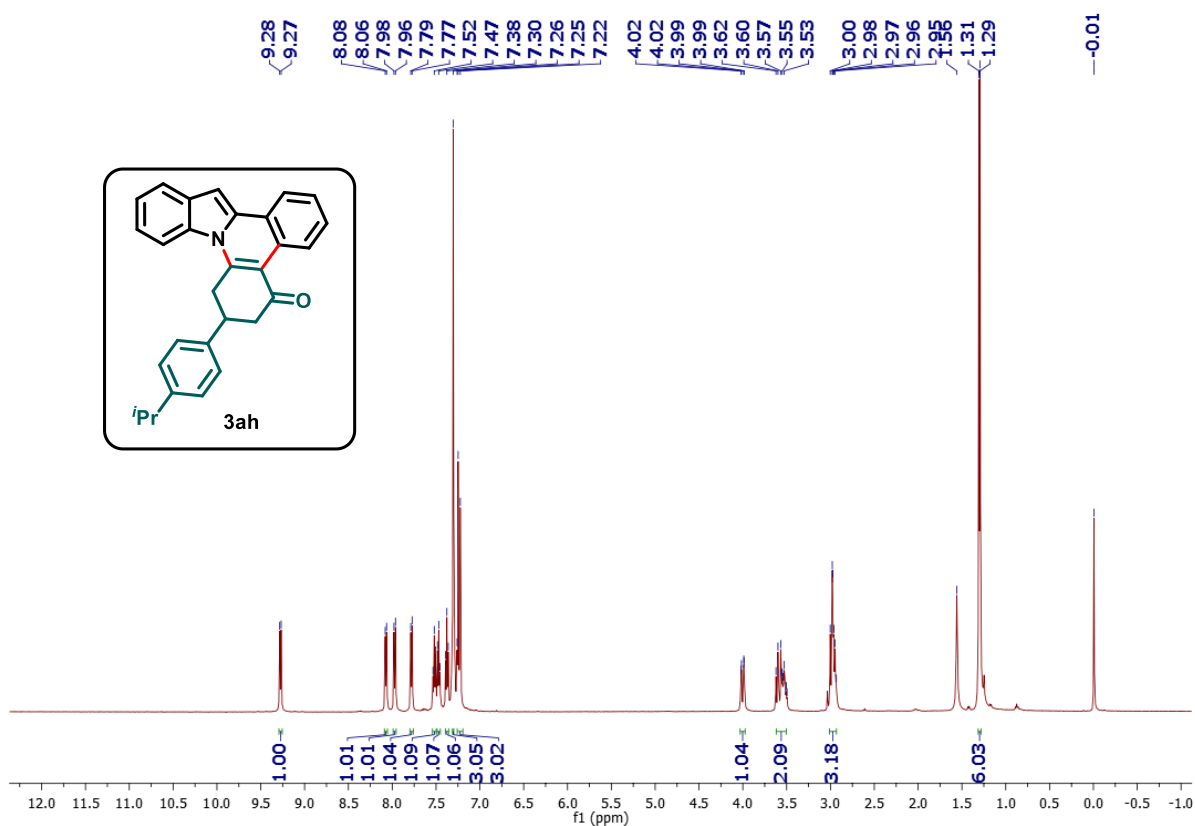

**<sup>1</sup>H NMR of compound 3ah (500 MHz, CDCl<sub>3</sub>)**

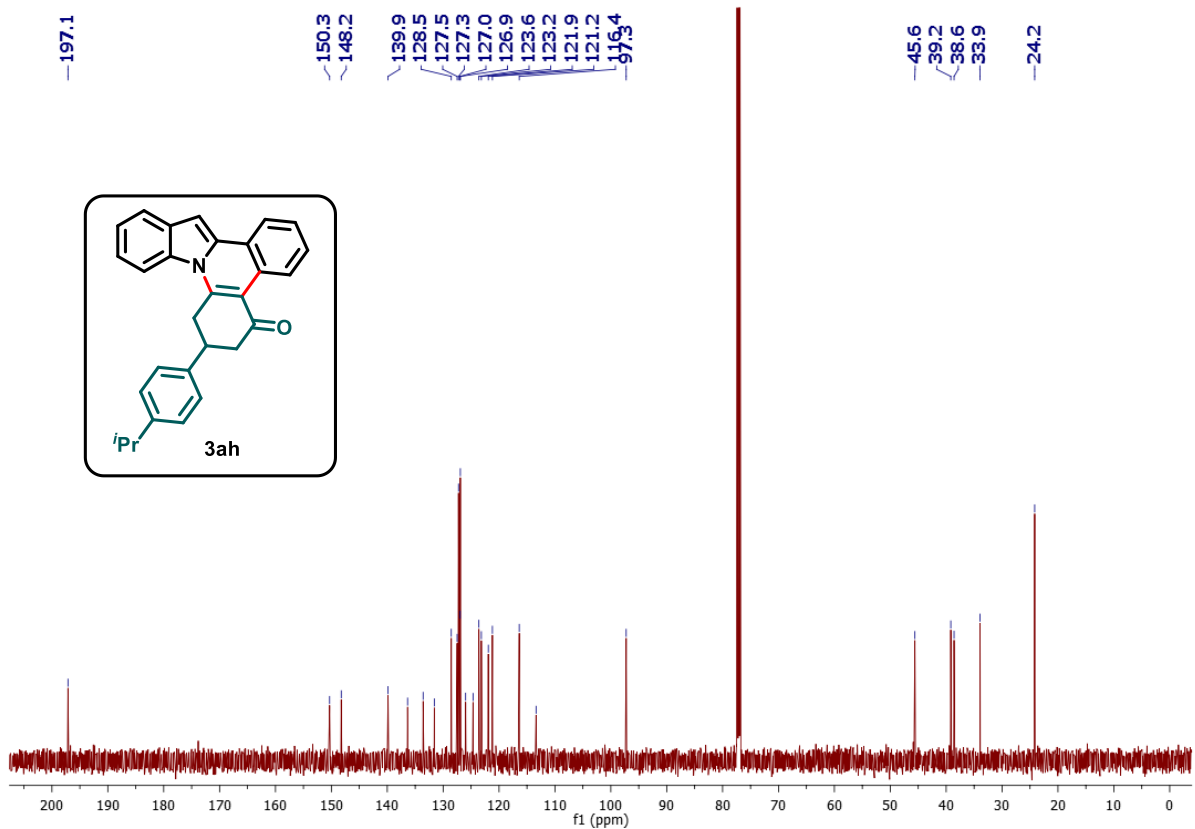

**<sup>13</sup>C NMR of compound 3ah (126 MHz, CDCl<sub>3</sub>)**

7-(4-fluorophenyl)-7,8-dihydroindolo[1,2-f]phenanthridin-5(6H)-one (3ai):

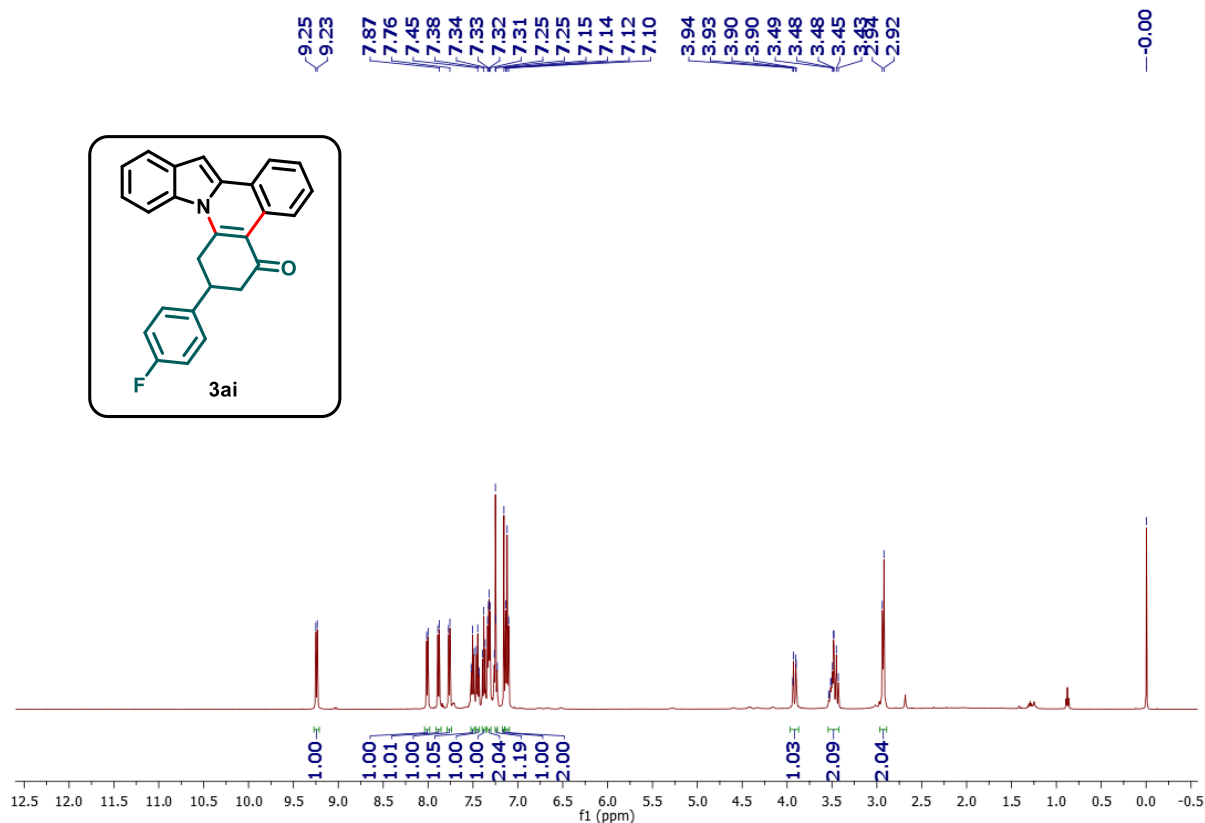

<sup>1</sup>H NMR of compound 3ai (500 MHz, CDCl<sub>3</sub>)

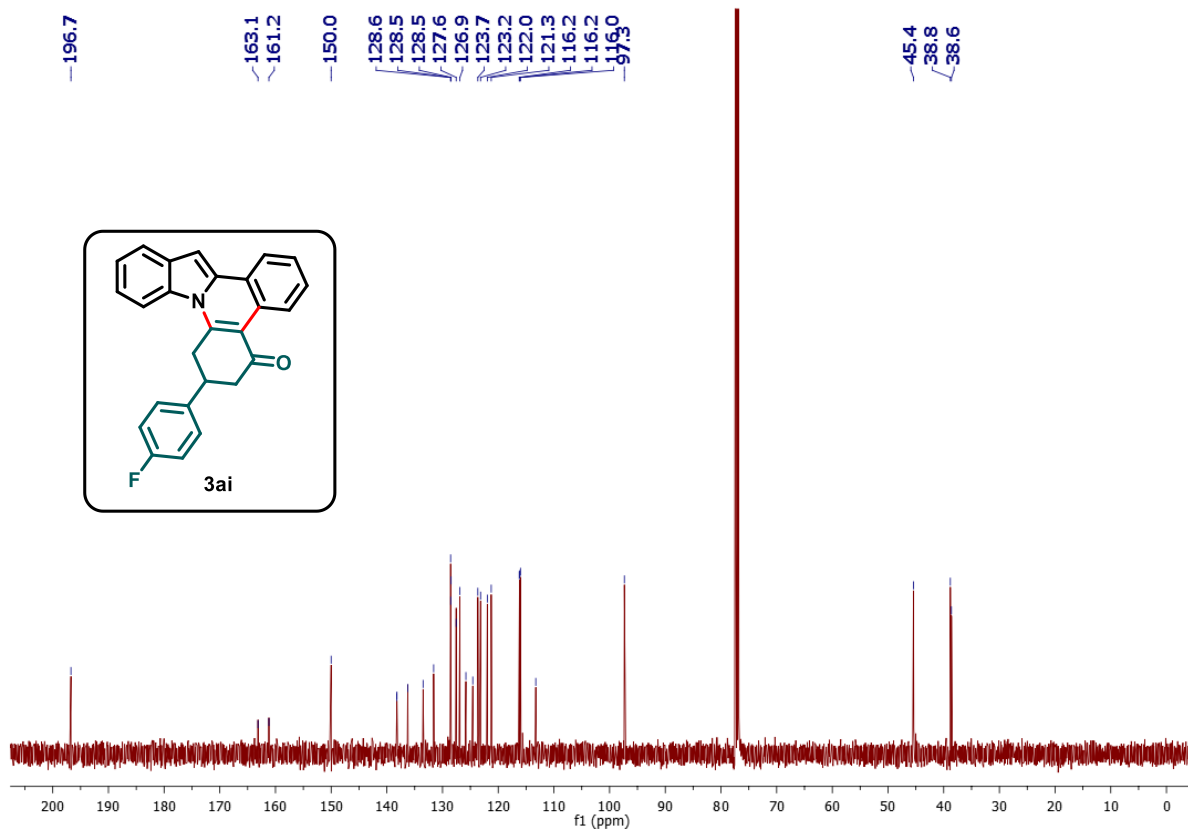

<sup>13</sup>C NMR of compound 3ai (126 MHz, CDCl<sub>3</sub>)



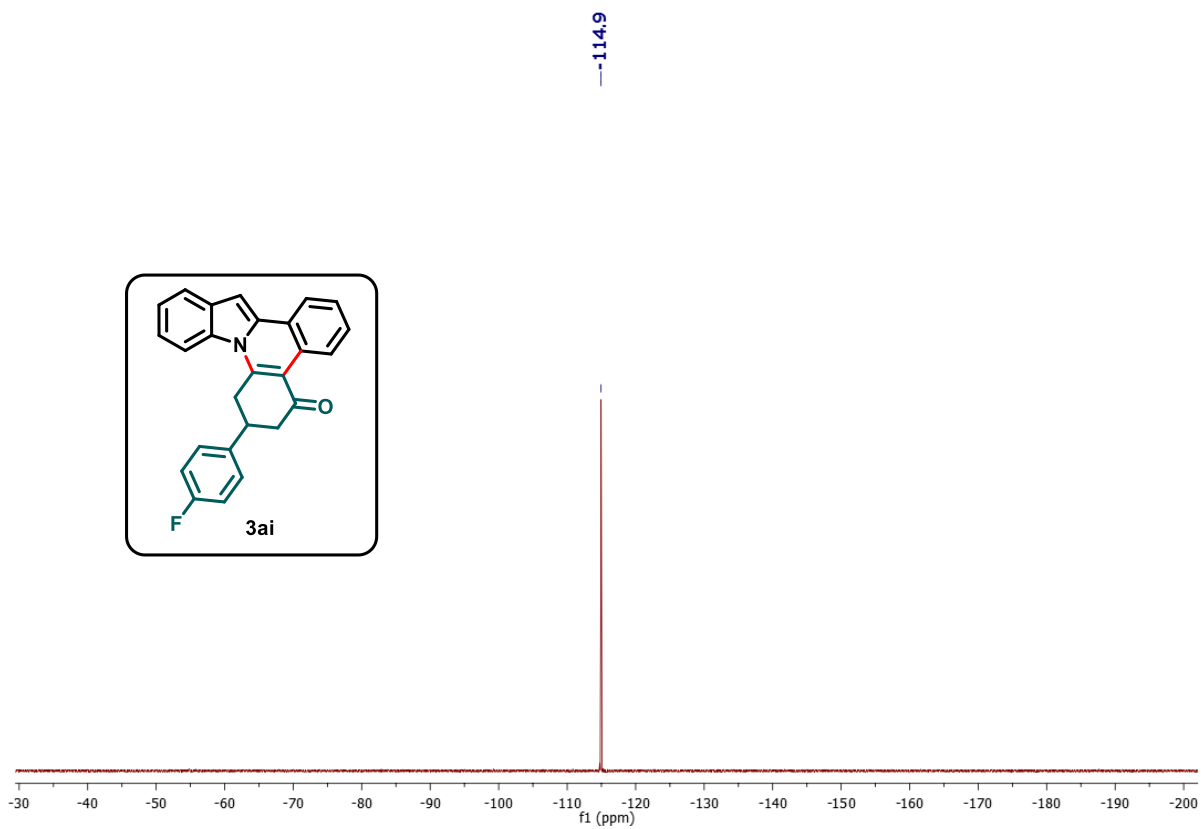

$^{19}\text{F}$  NMR of compound **3ai** (470 MHz,  $\text{CDCl}_3$ )

7-(4-chlorophenyl)-7,8-dihydroindolo[1,2-f]phenanthridin-5(6H)-one (3aj):

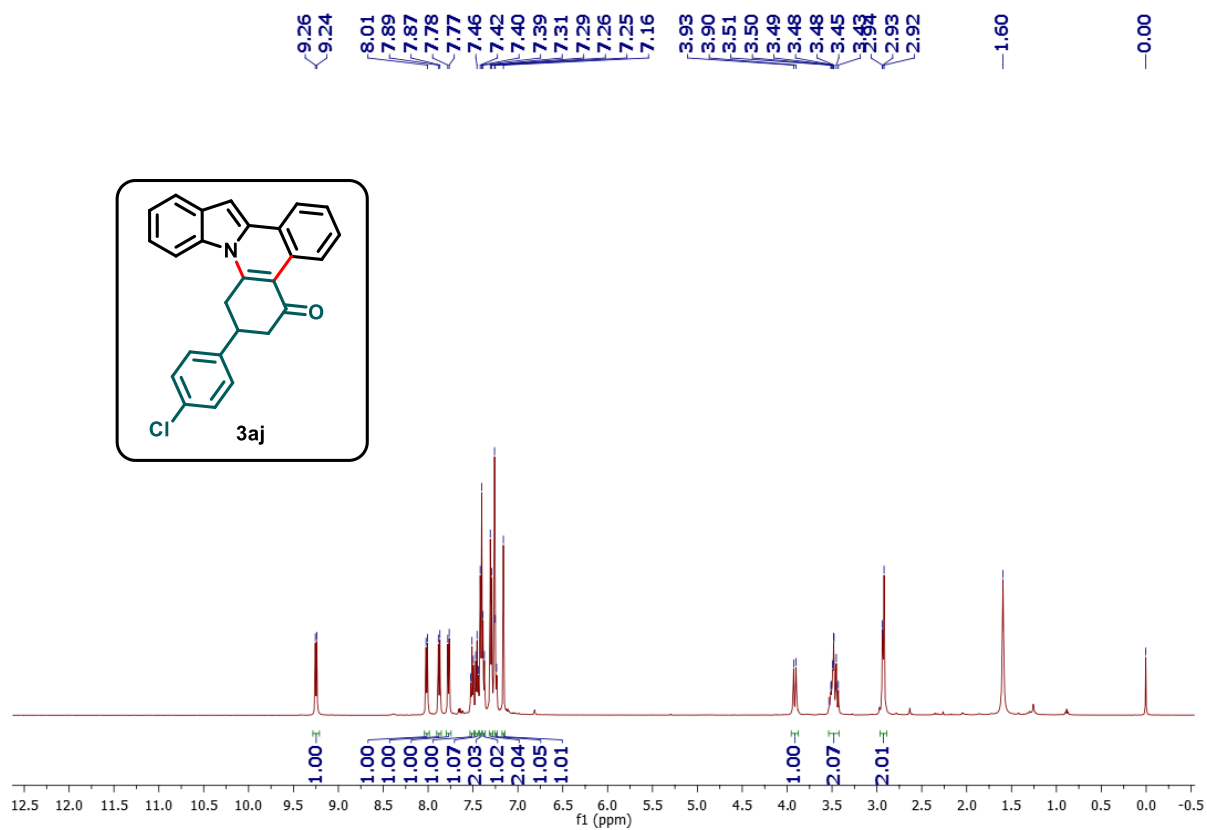

<sup>1</sup>H NMR of compound 3aj (500 MHz, CDCl<sub>3</sub>)

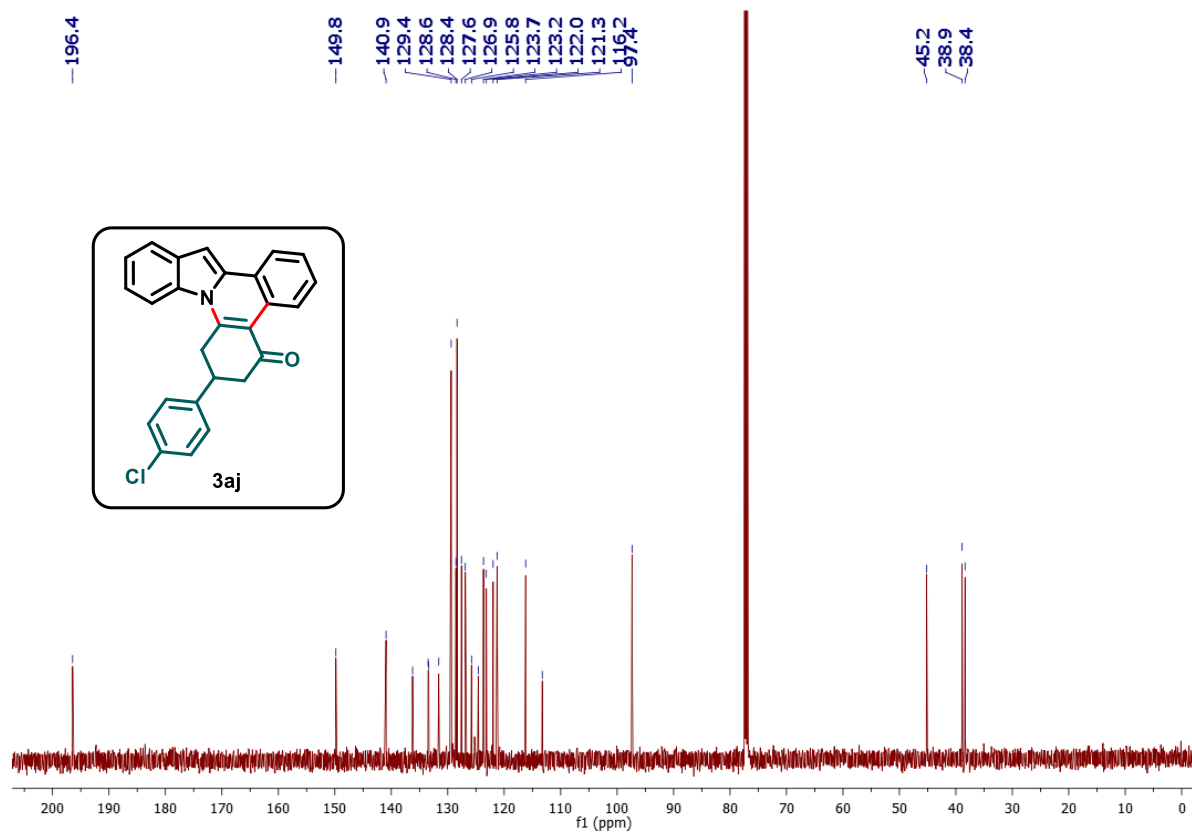

<sup>13</sup>C NMR of compound 3aj (126 MHz, CDCl<sub>3</sub>)

7-(4-bromophenyl)-7,8-dihydroindolo[1,2-*f*]phenanthridin-5(6*H*)-one (3ak):

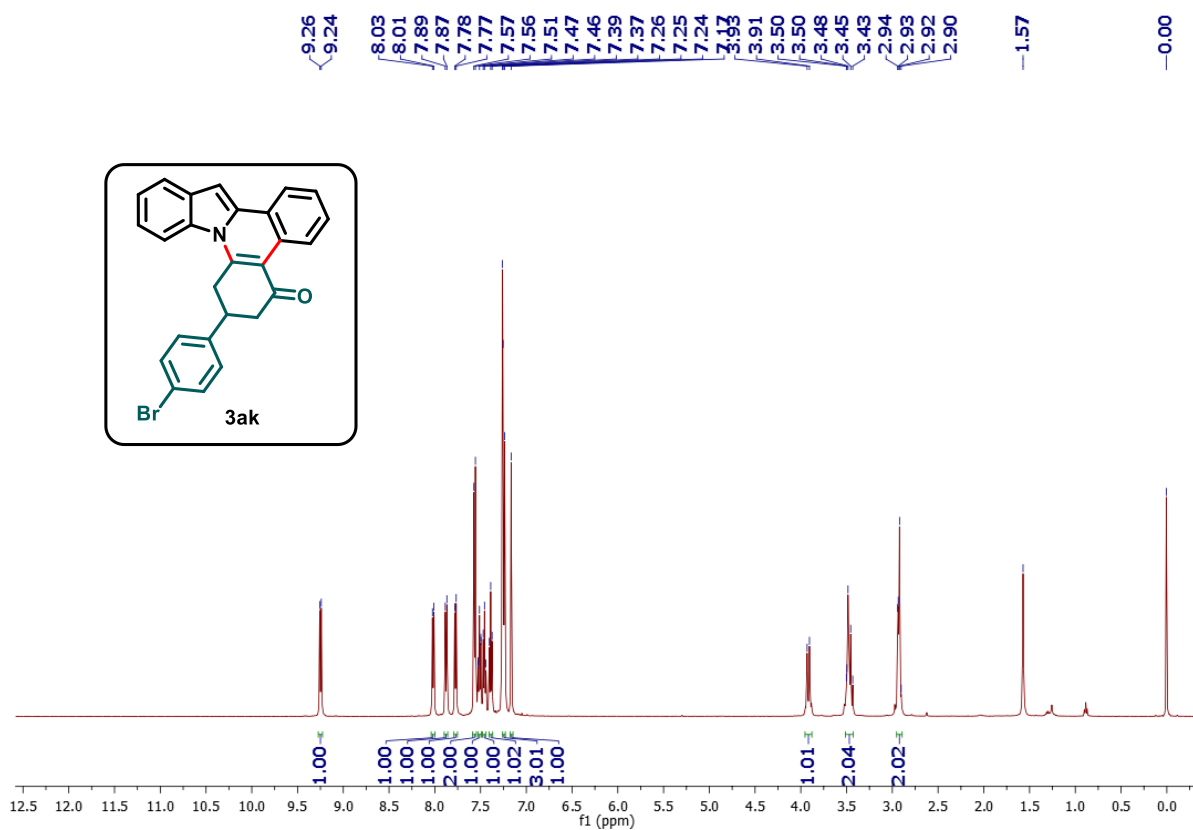

<sup>1</sup>H NMR of compound 3ak (500 MHz, CDCl<sub>3</sub>)

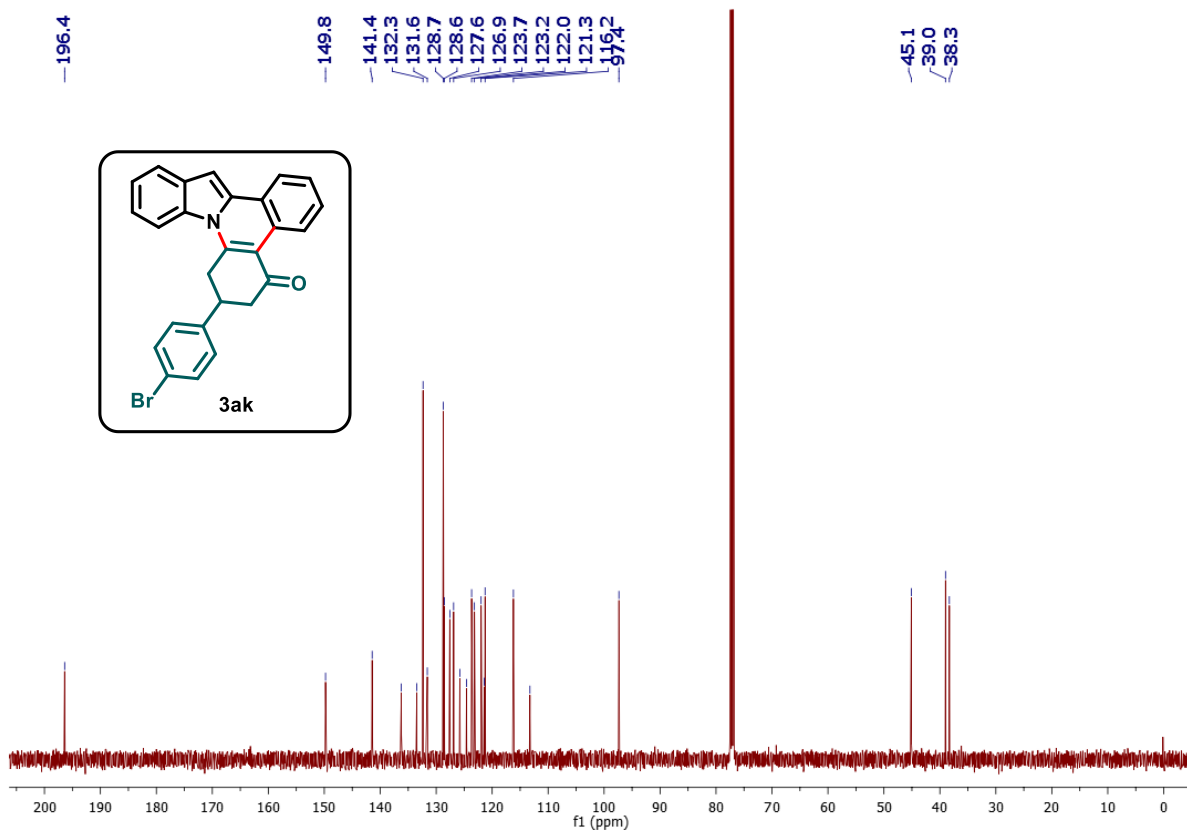

<sup>13</sup>C NMR of compound 3ak (126 MHz, CDCl<sub>3</sub>)

**1,2,3,9-tetrahydro-4H-dibenzo[*a,c*]carbazol-4-one (4a):**

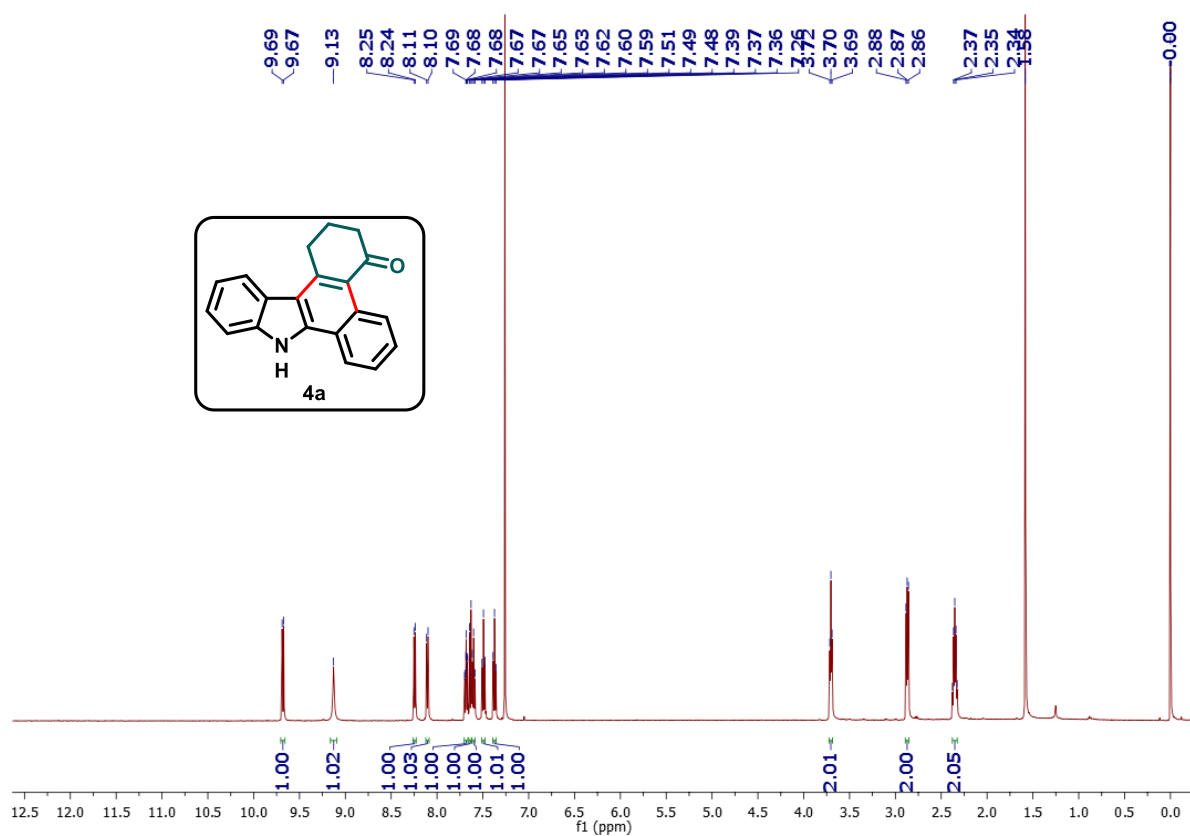

**<sup>1</sup>H NMR of compound 4a (500 MHz, CDCl<sub>3</sub>)**

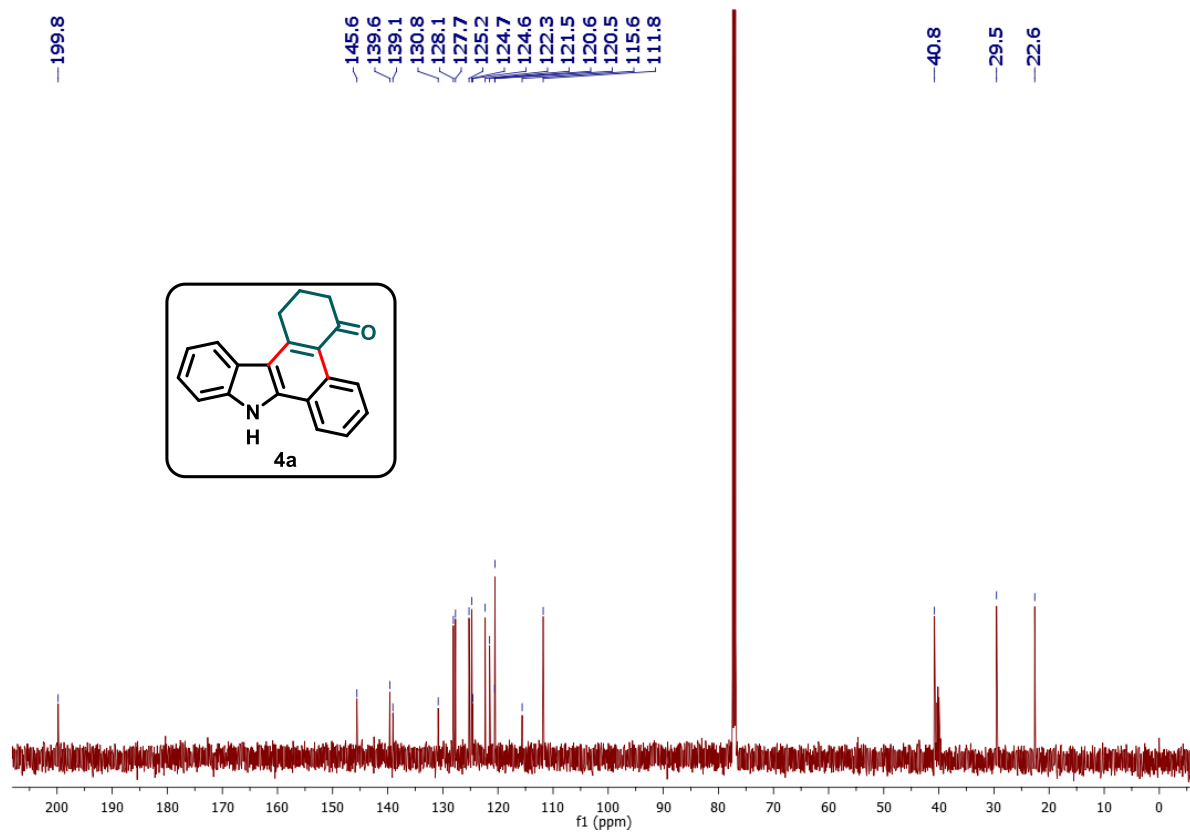

**<sup>13</sup>C NMR of compound 4a (126 MHz, CDCl<sub>3</sub>)**

6-methyl-1,2,3,9-tetrahydro-4*H*-dibenzo[*a,c*]carbazol-4-one (4b):

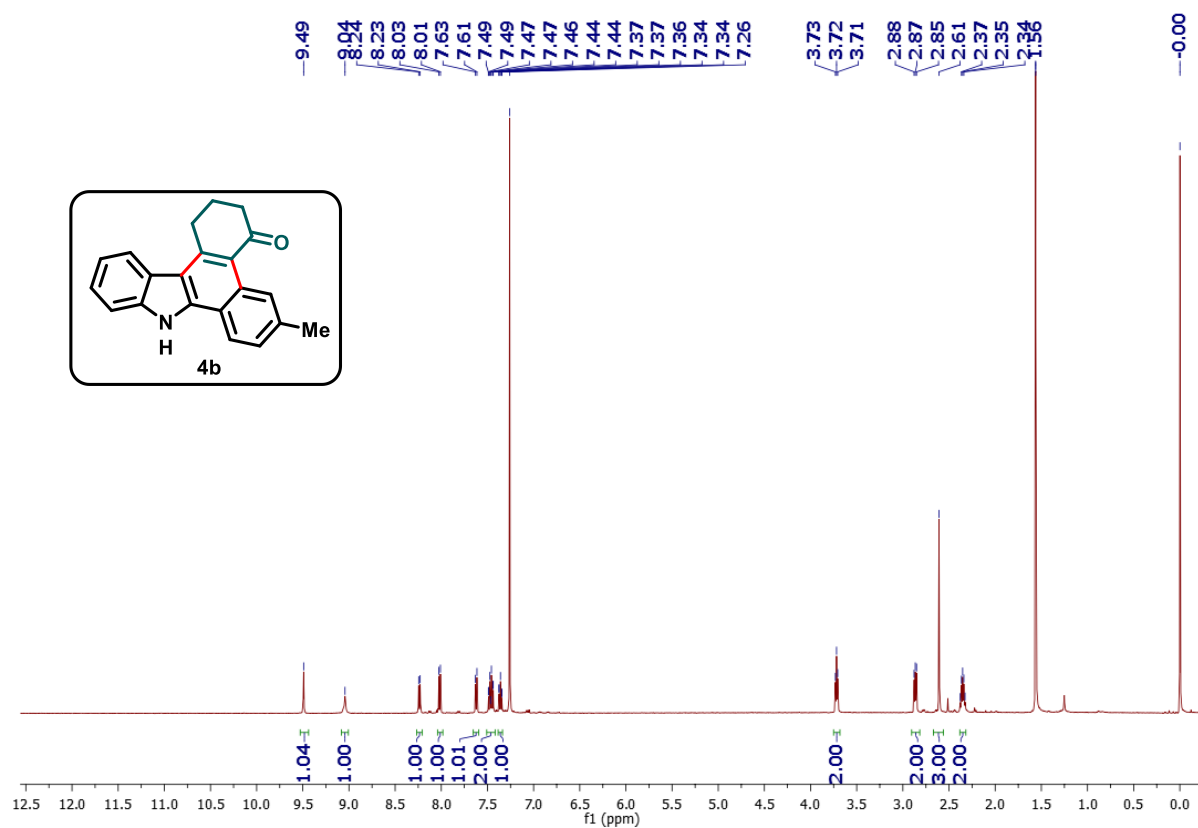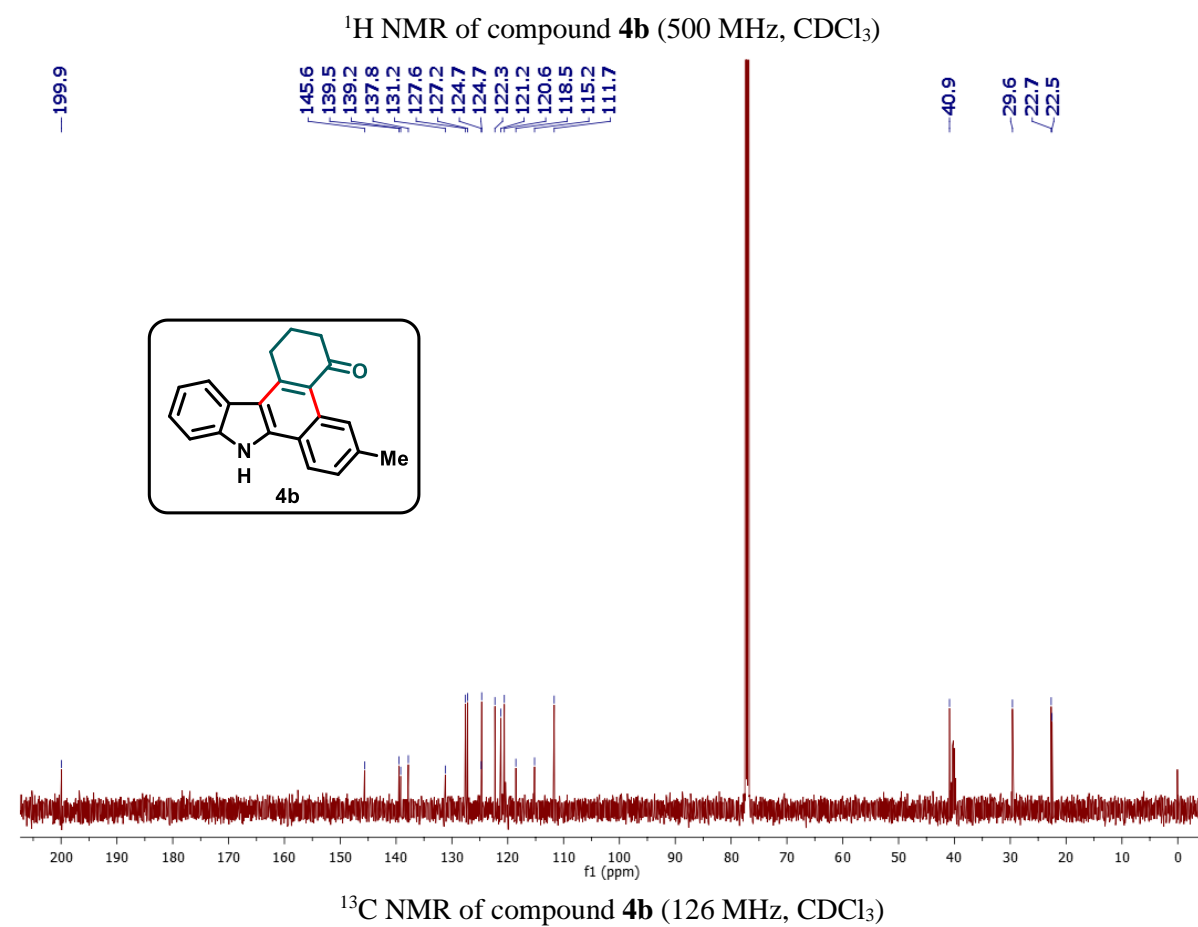

**6-ethyl-1,2,3,9-tetrahydro-4H-dibenzo[*a,c*]carbazol-4-one (4c):**

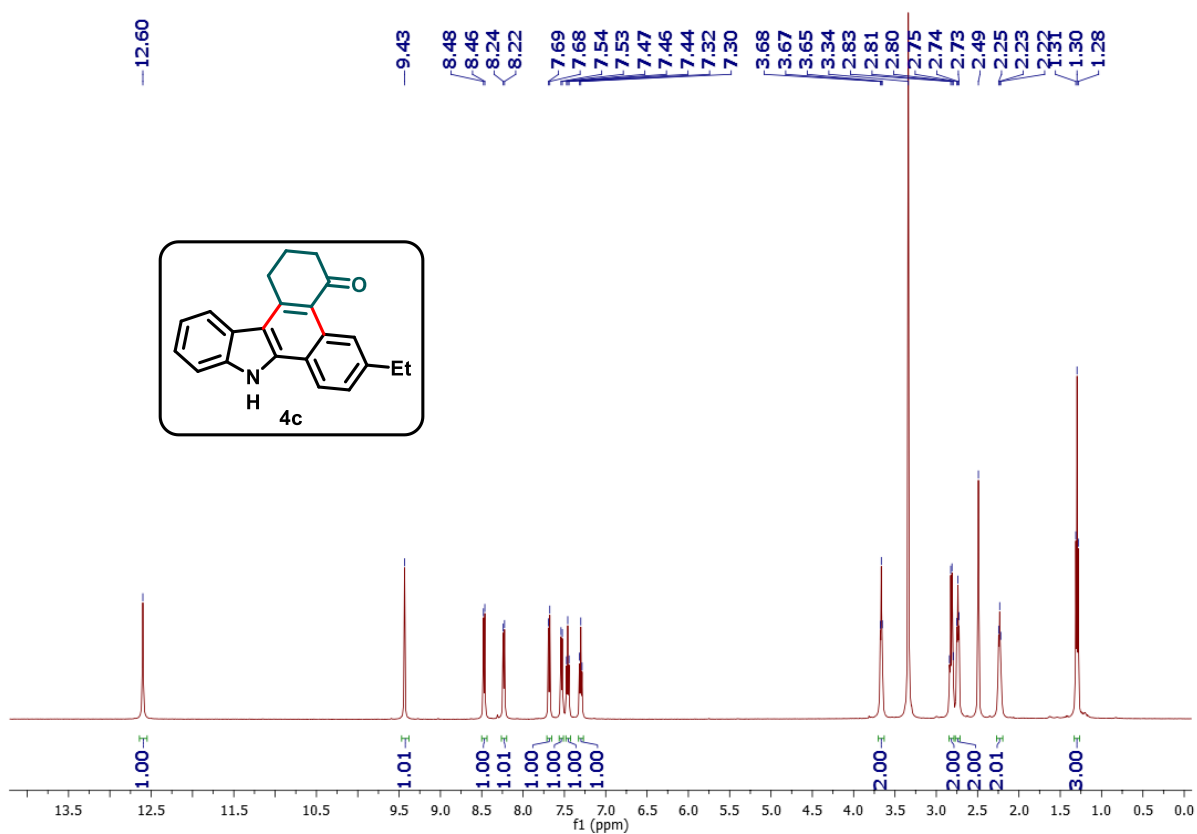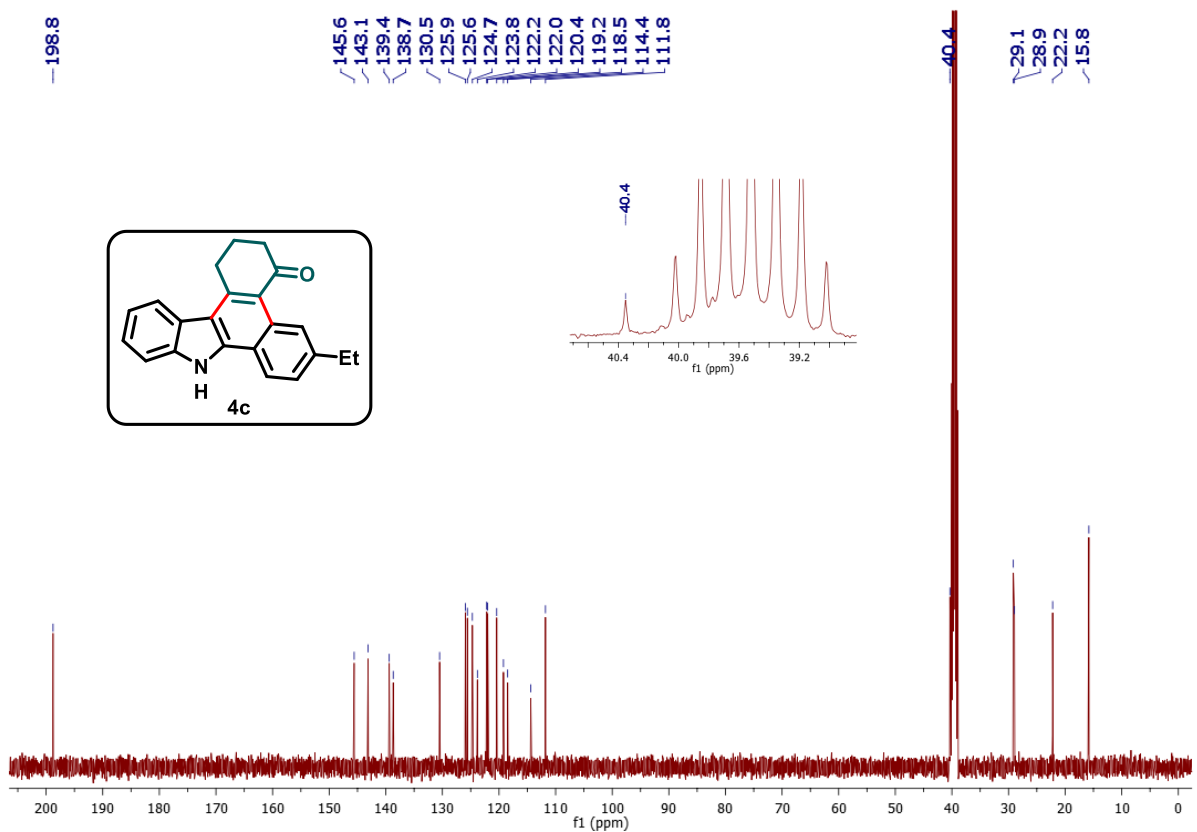

6-(*tert*-butyl)-1,2,3,9-tetrahydro-4*H*-dibenzo[*a,c*]carbazol-4-one (4d):

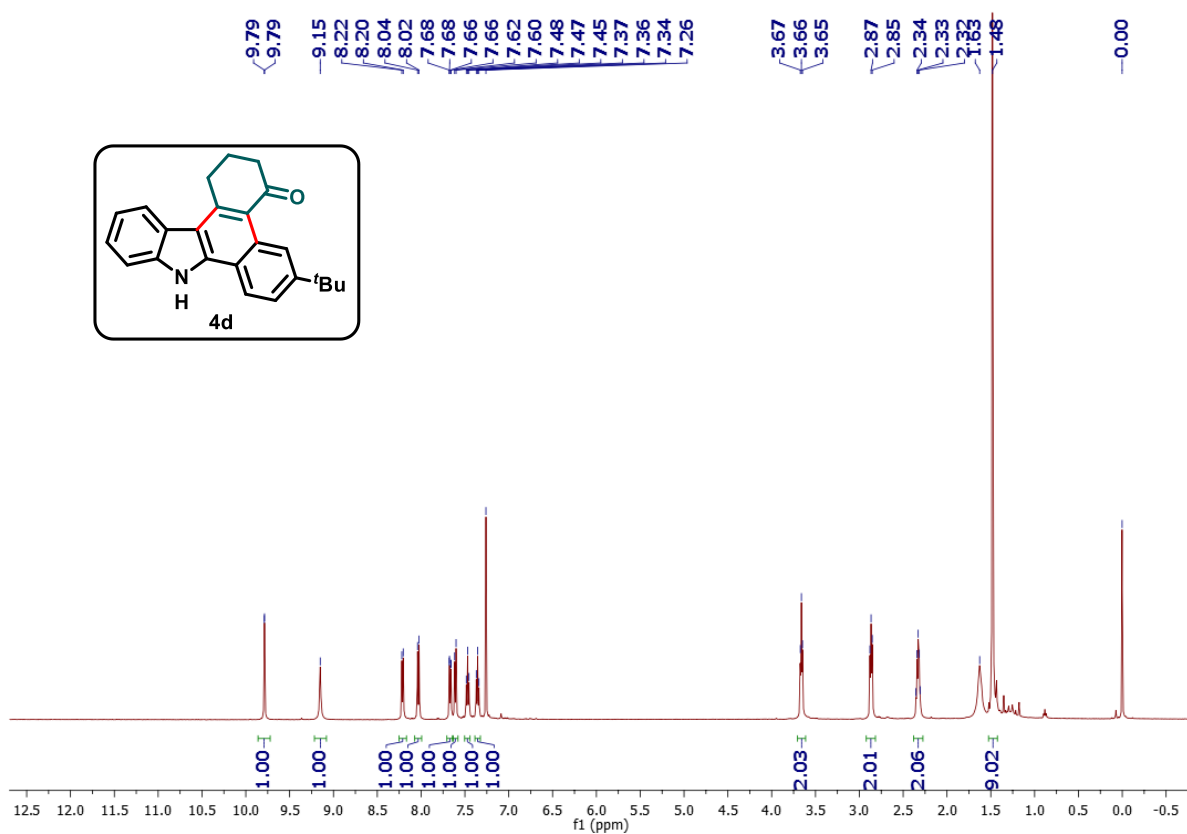

<sup>1</sup>H NMR of compound **4d** (500 MHz, CDCl<sub>3</sub>)

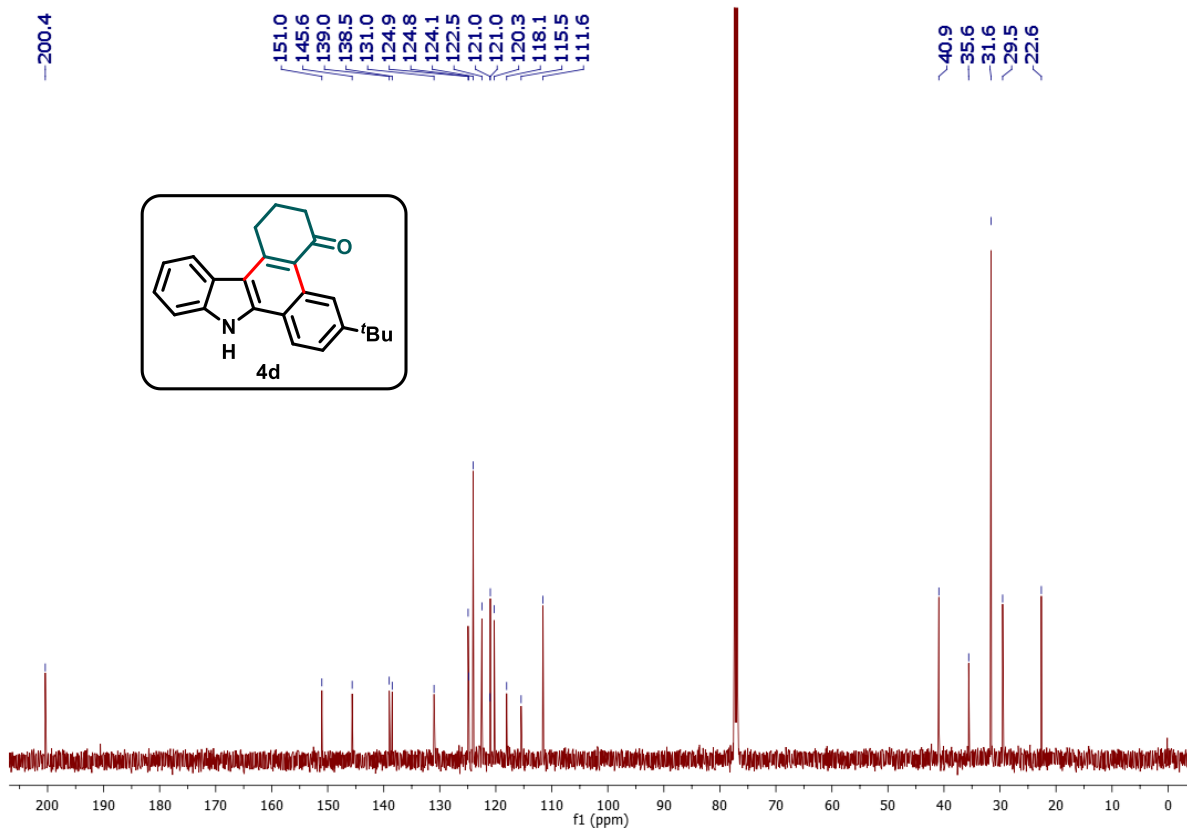

<sup>13</sup>C NMR of compound **4d** (126 MHz, CDCl<sub>3</sub>)

**6-methoxy-1,2,3,9-tetrahydro-4H-dibenzo[*a,c*]carbazol-4-one(4e):**

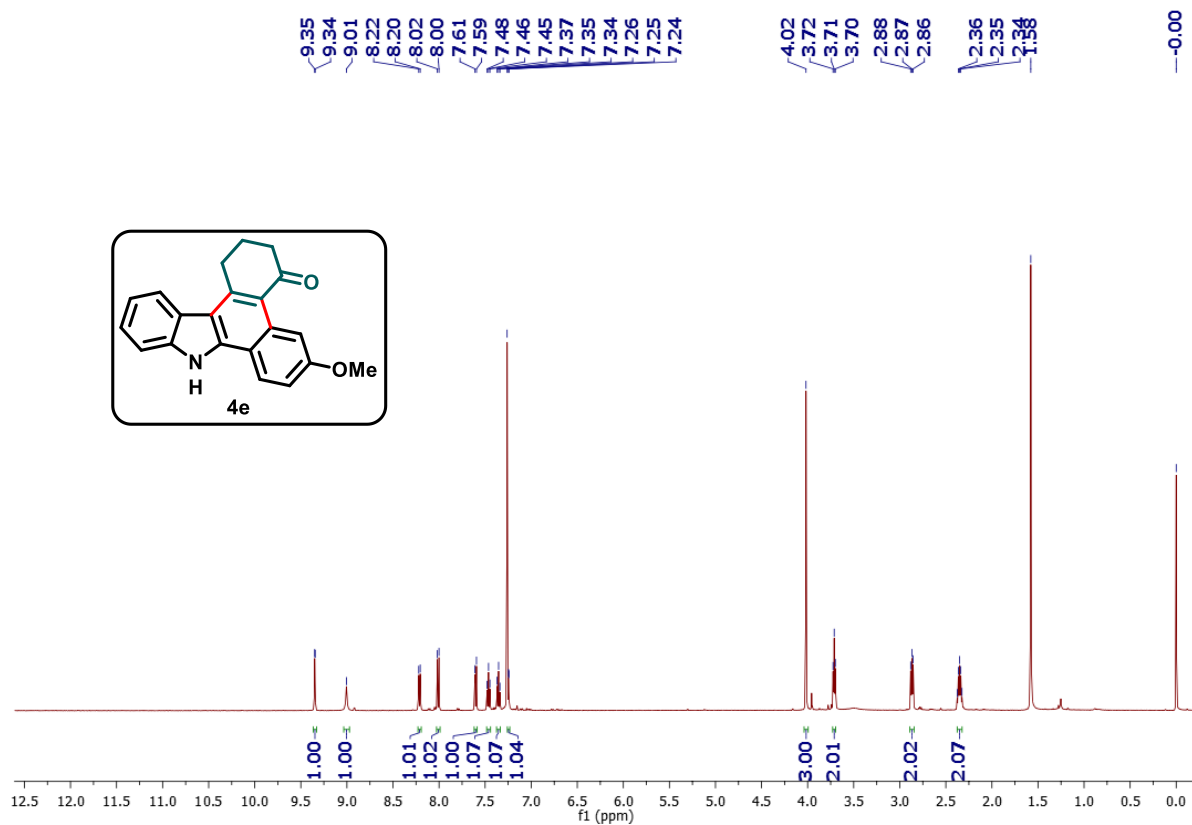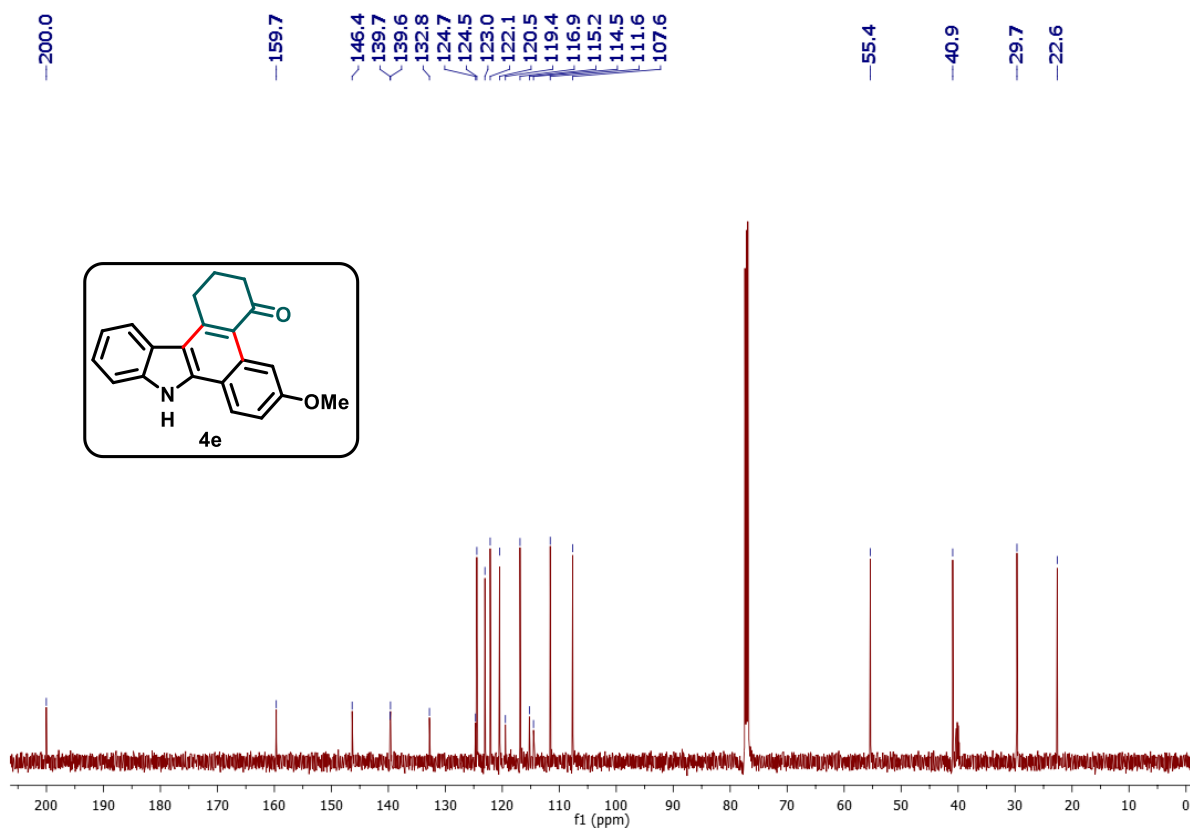



6-fluoro-1,2,3,9-tetrahydro-4H-dibenzo[a,c]carbazol-4-one (4f):

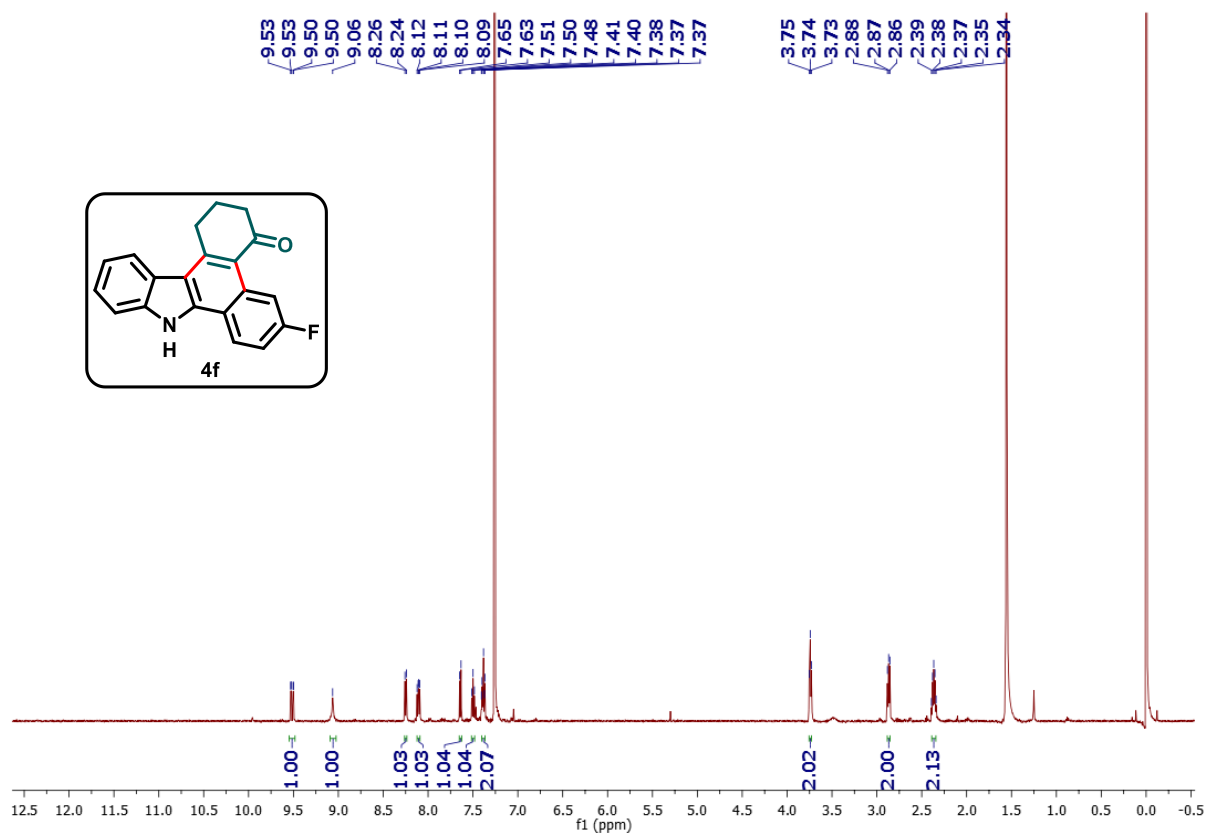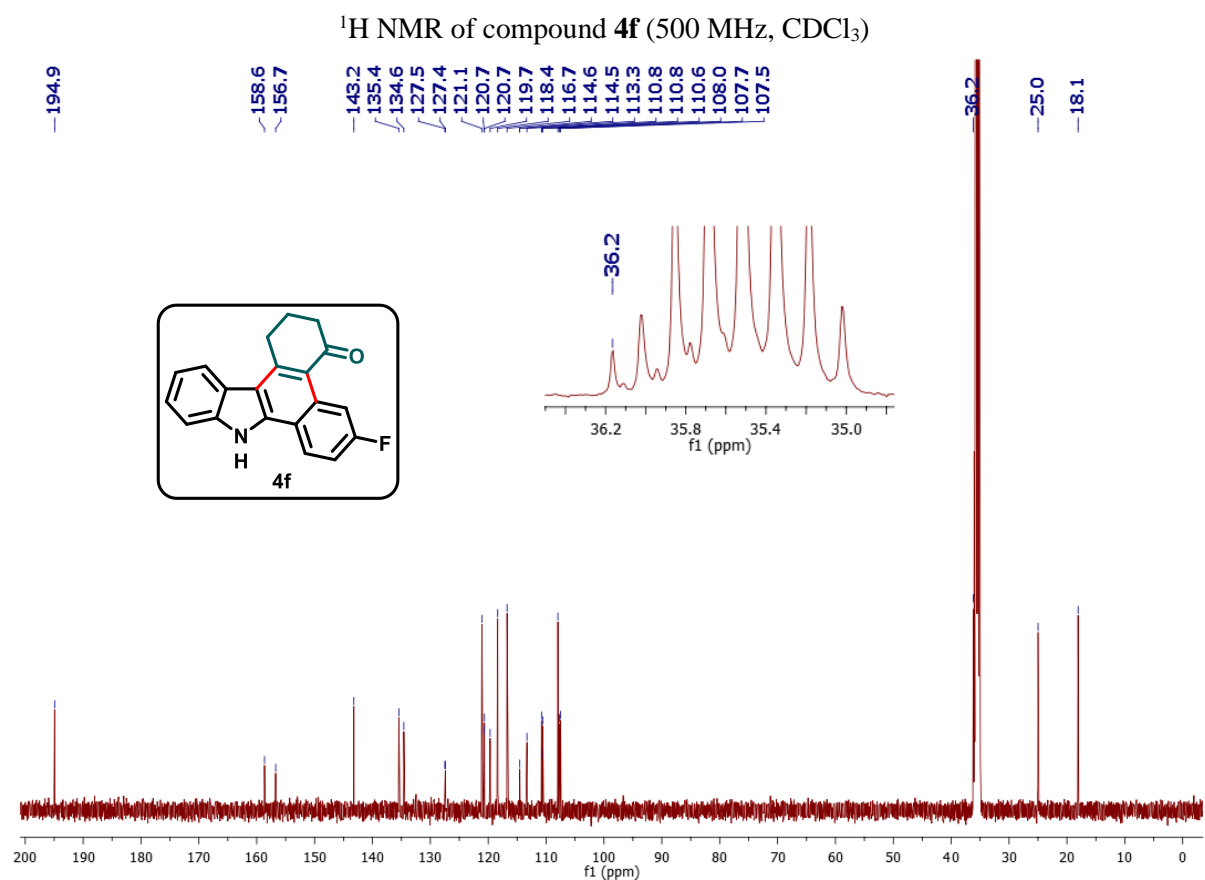

--110.92

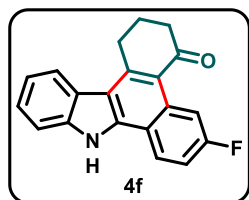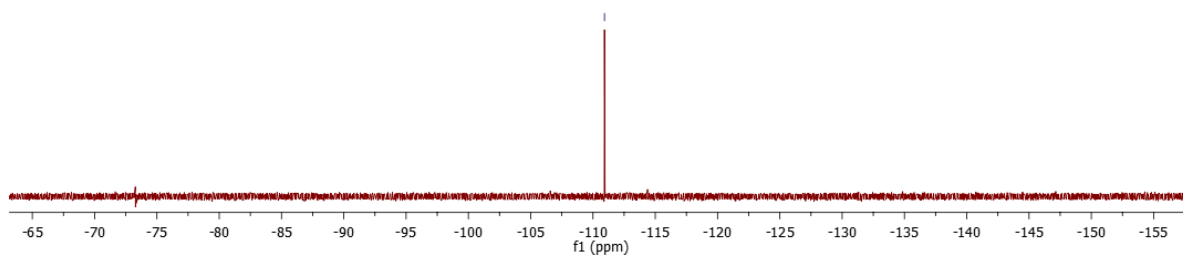

$^{19}\text{F}$  NMR of compound **4f** (470 MHz,  $\text{CDCl}_3$ )

**6-chloro-1,2,3,9-tetrahydro-4H-dibenzo[*a,c*]carbazol-4-one (4g):**

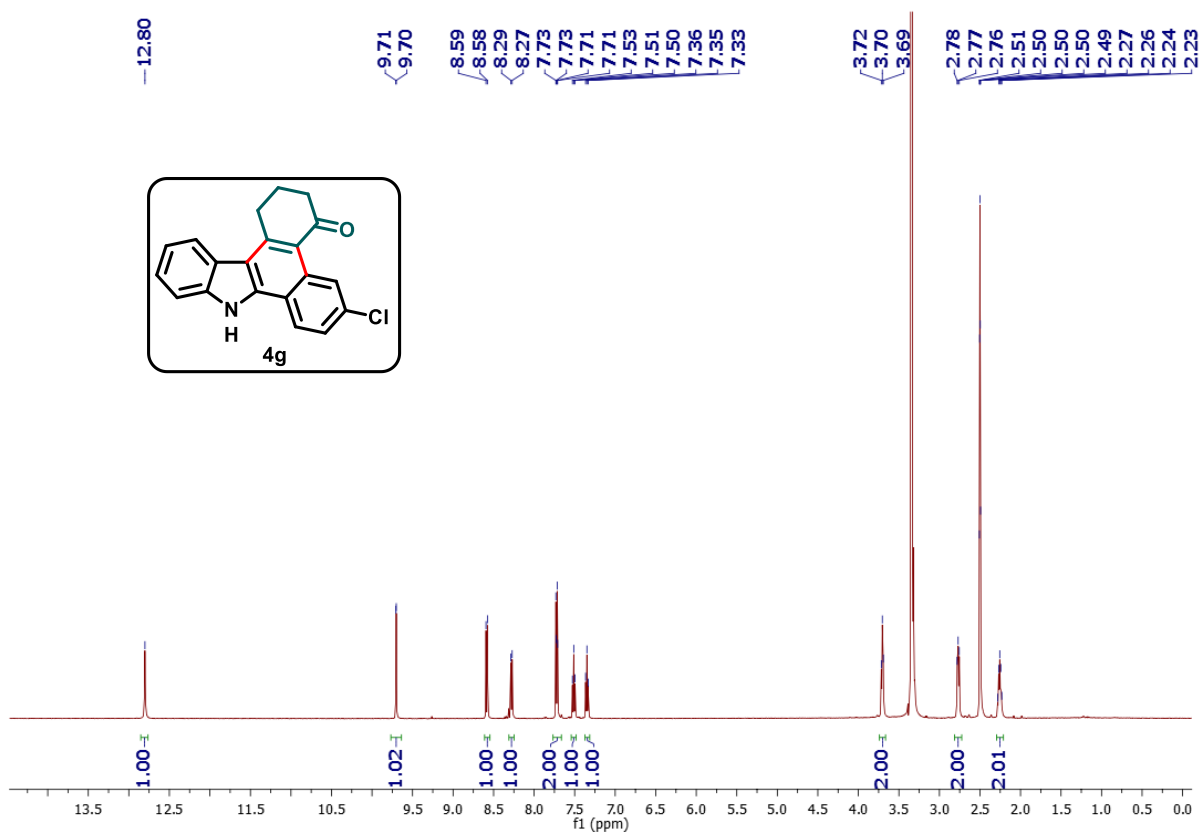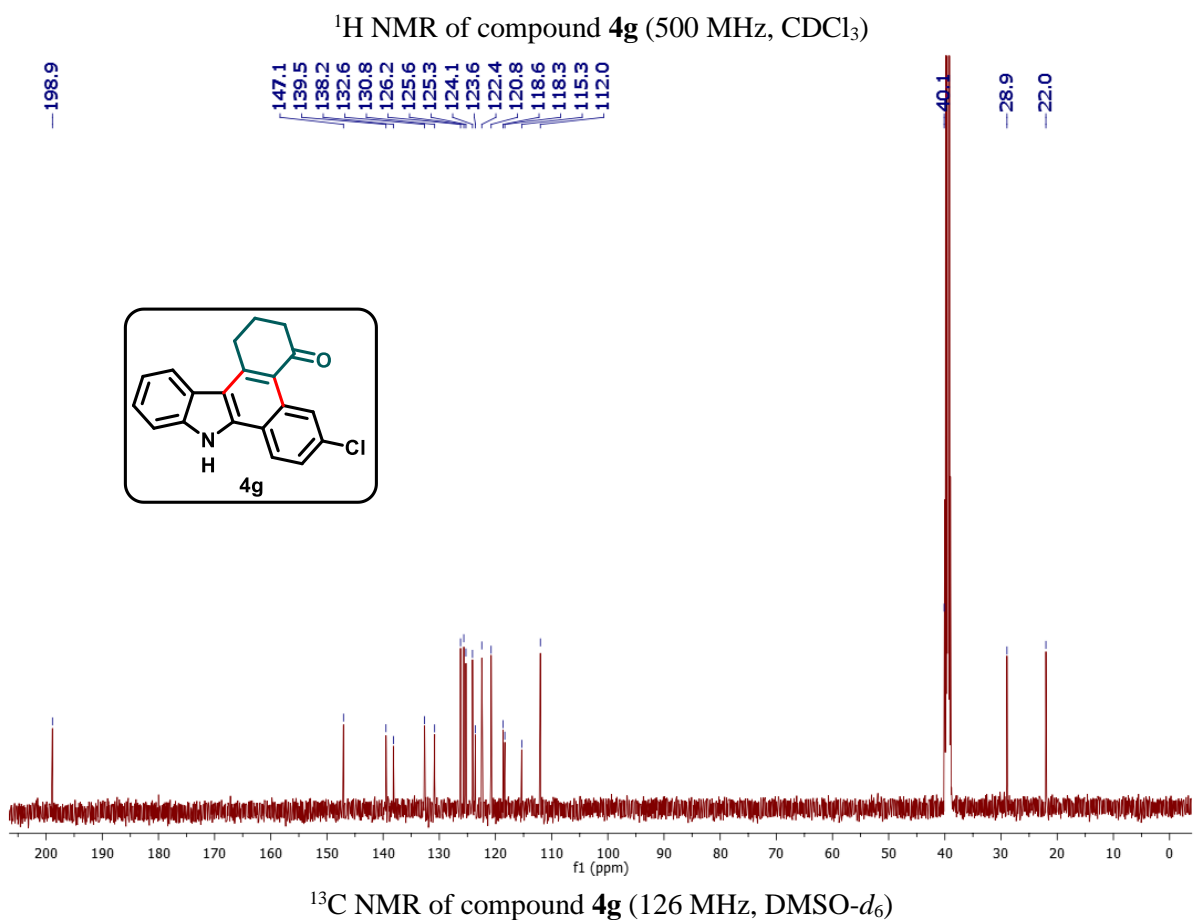

**6-(trifluoromethyl)-1,2,3,9-tetrahydro-4H-dibenzo[*a,c*]carbazol-4-one (4h):**

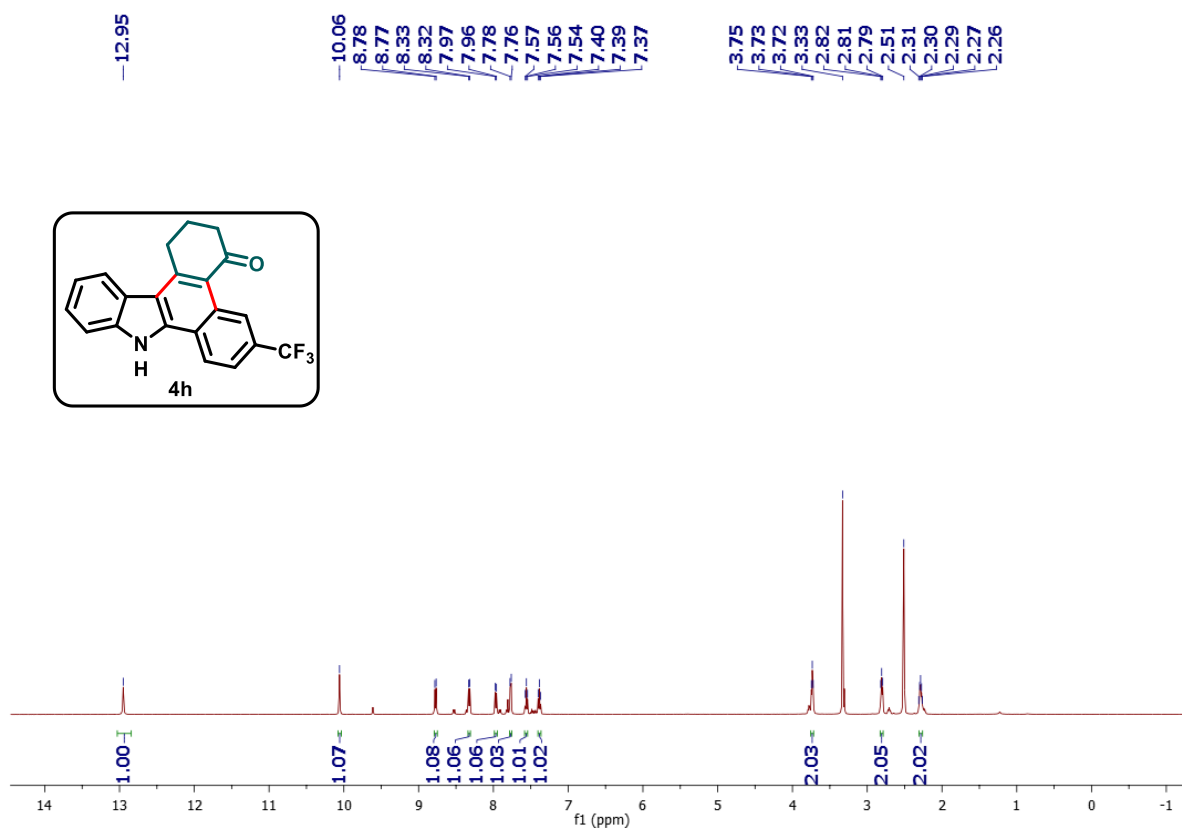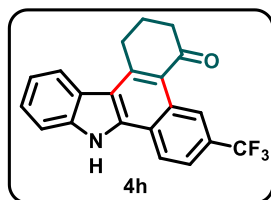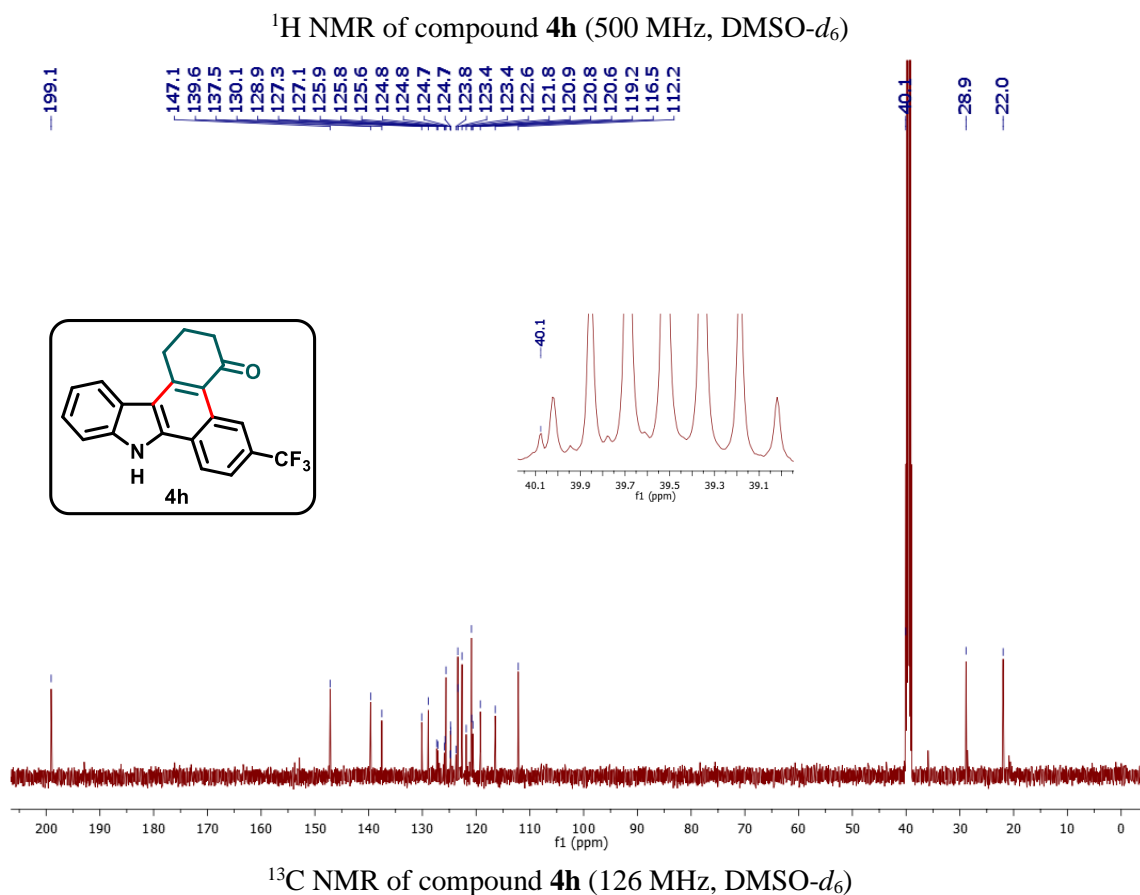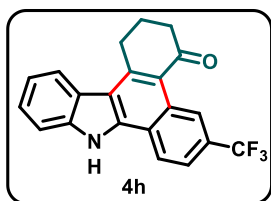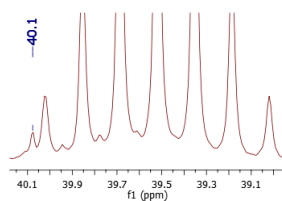

--60.43

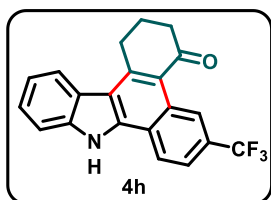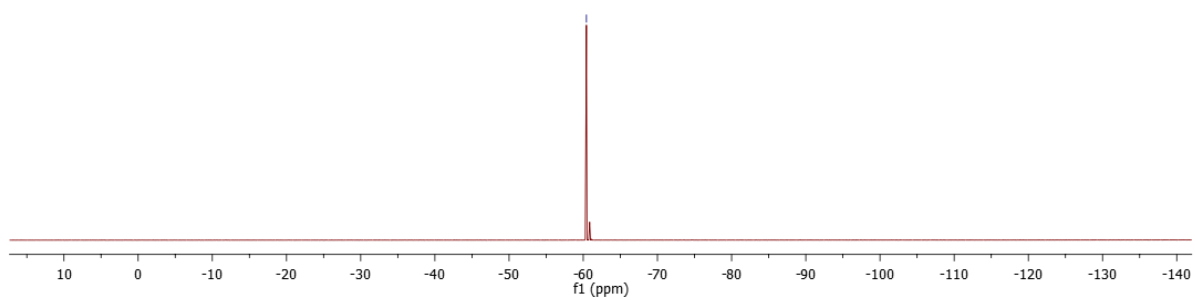

$^{19}\text{F}$  NMR of compound **4h** (470 MHz,  $\text{DMSO}-d_6$ )

**7-methoxy-1,2,3,9-tetrahydro-4H-dibenzo[*a,c*]carbazol-4-one (4j):**

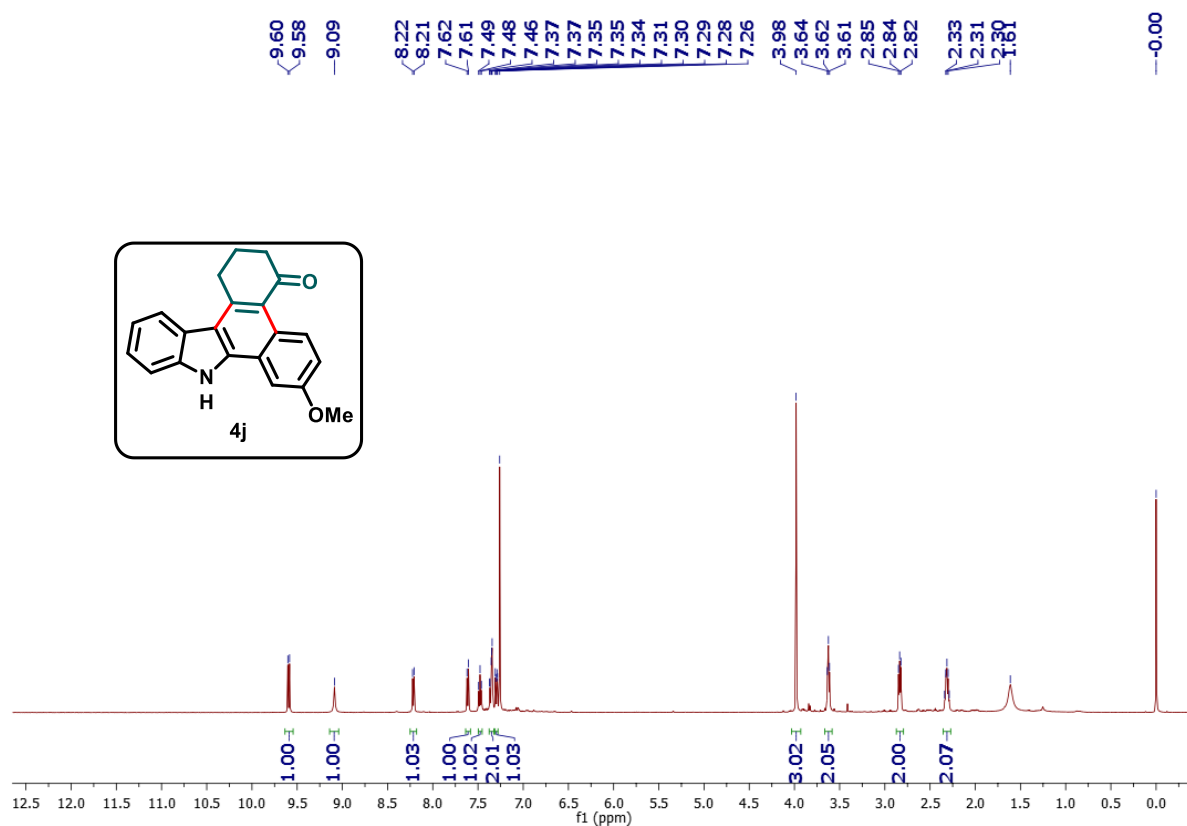

**<sup>1</sup>H NMR of compound 4j (500 MHz, CDCl<sub>3</sub>)**

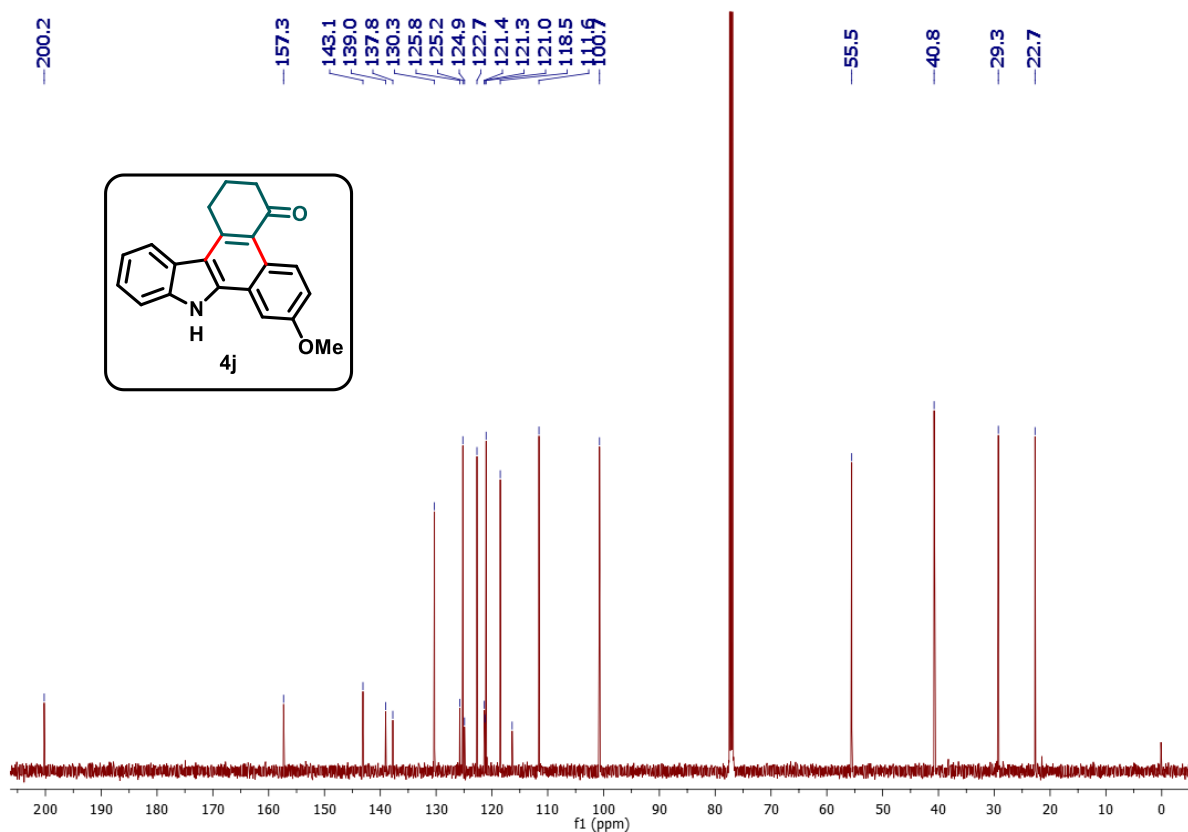

**<sup>13</sup>C NMR of compound 4j (126 MHz, CDCl<sub>3</sub>)**

**7-bromo-1,2,3,9-tetrahydro-4*H*-dibenzo[*a,c*]carbazol-4-one (4k):**

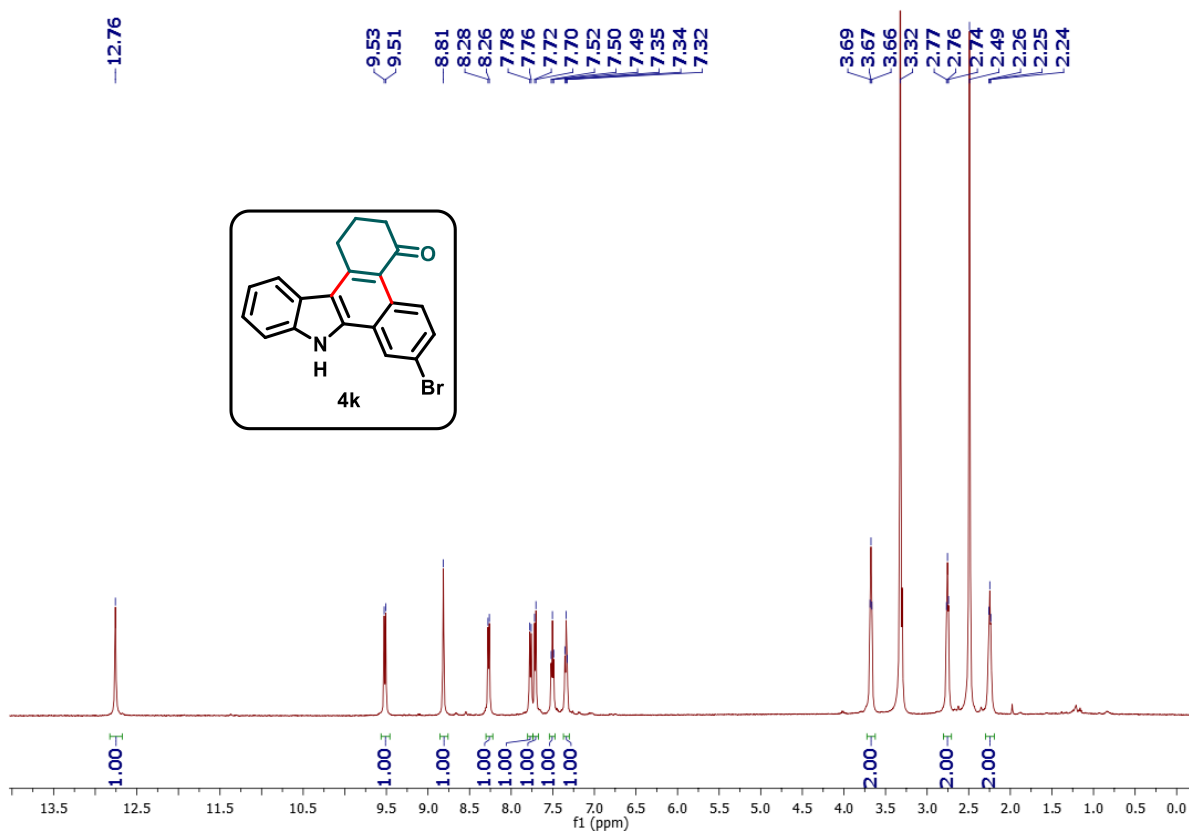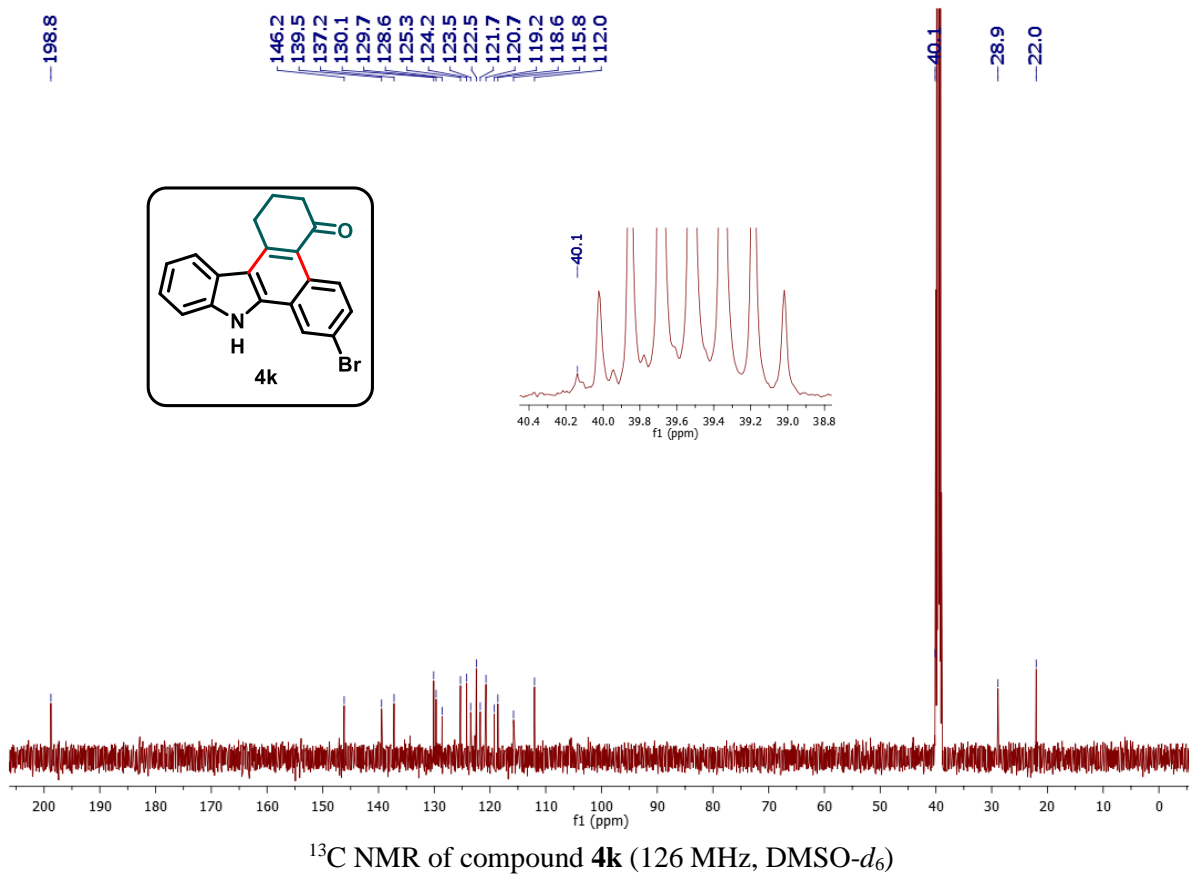

**6,7-dichloro-1,2,3,9-tetrahydro-4H-dibenzo[*a,c*]carbazol-4-one (4I):**

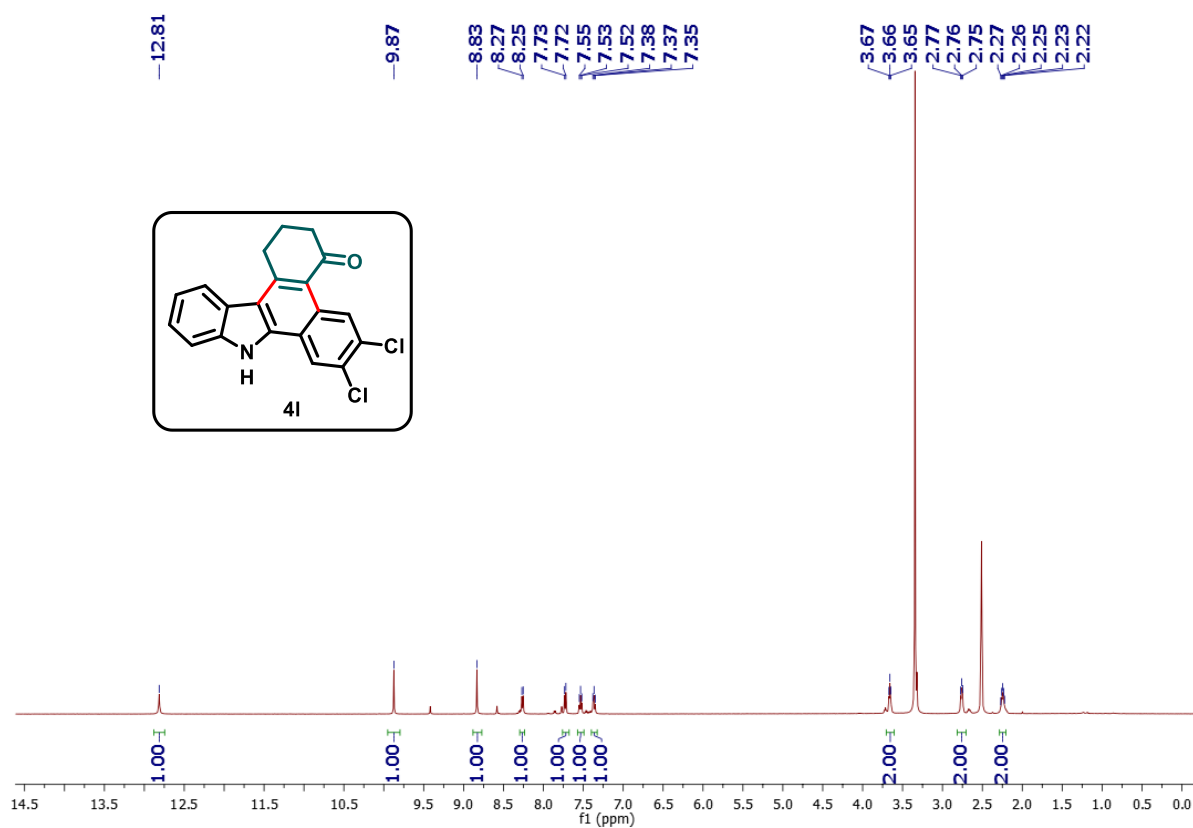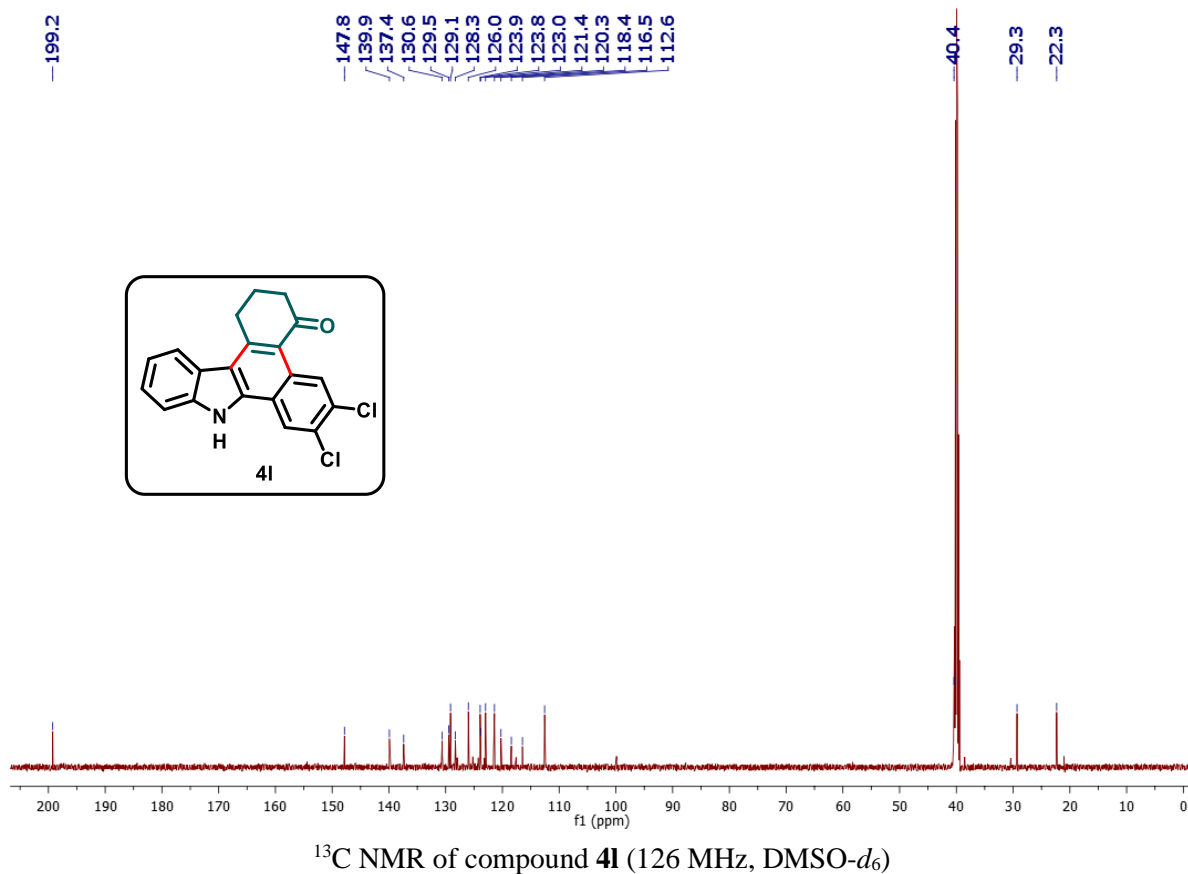



**12-methyl-1,2,3,9-tetrahydro-4H-dibenzo[*a,c*]carbazol-4-one (4m):**

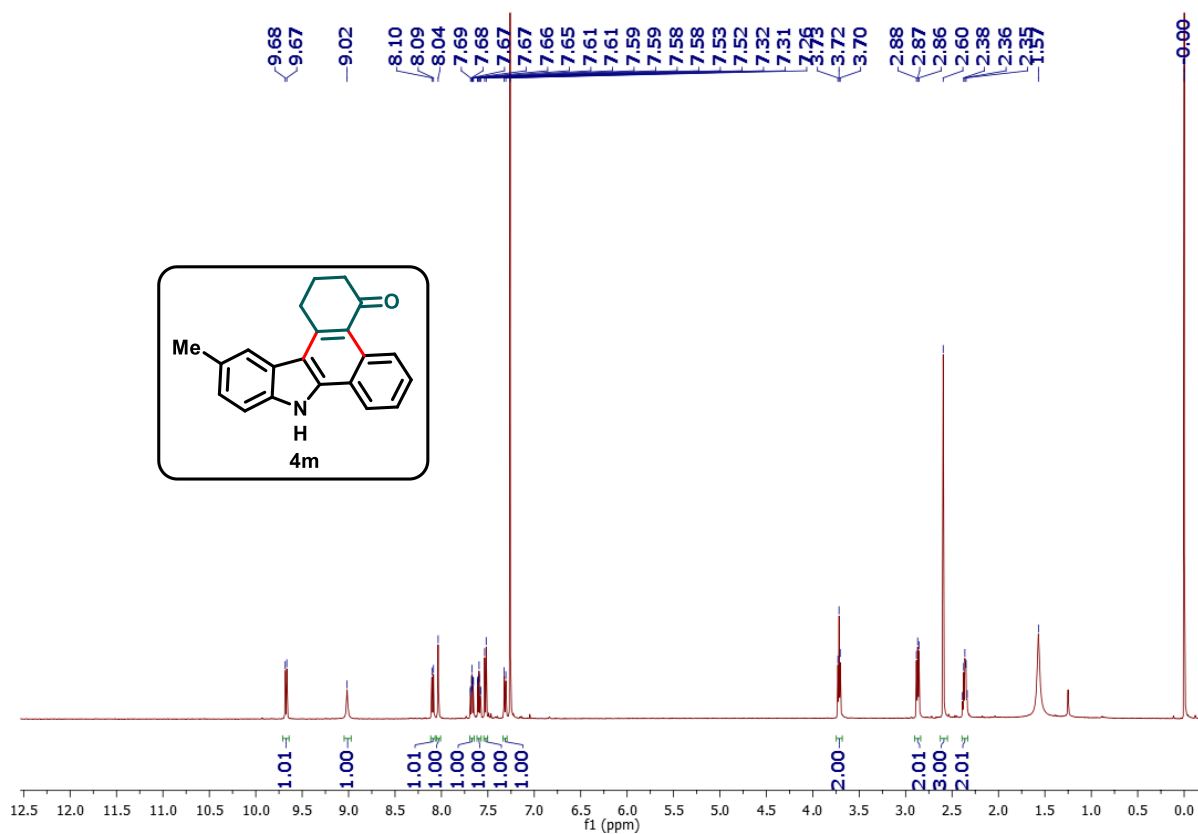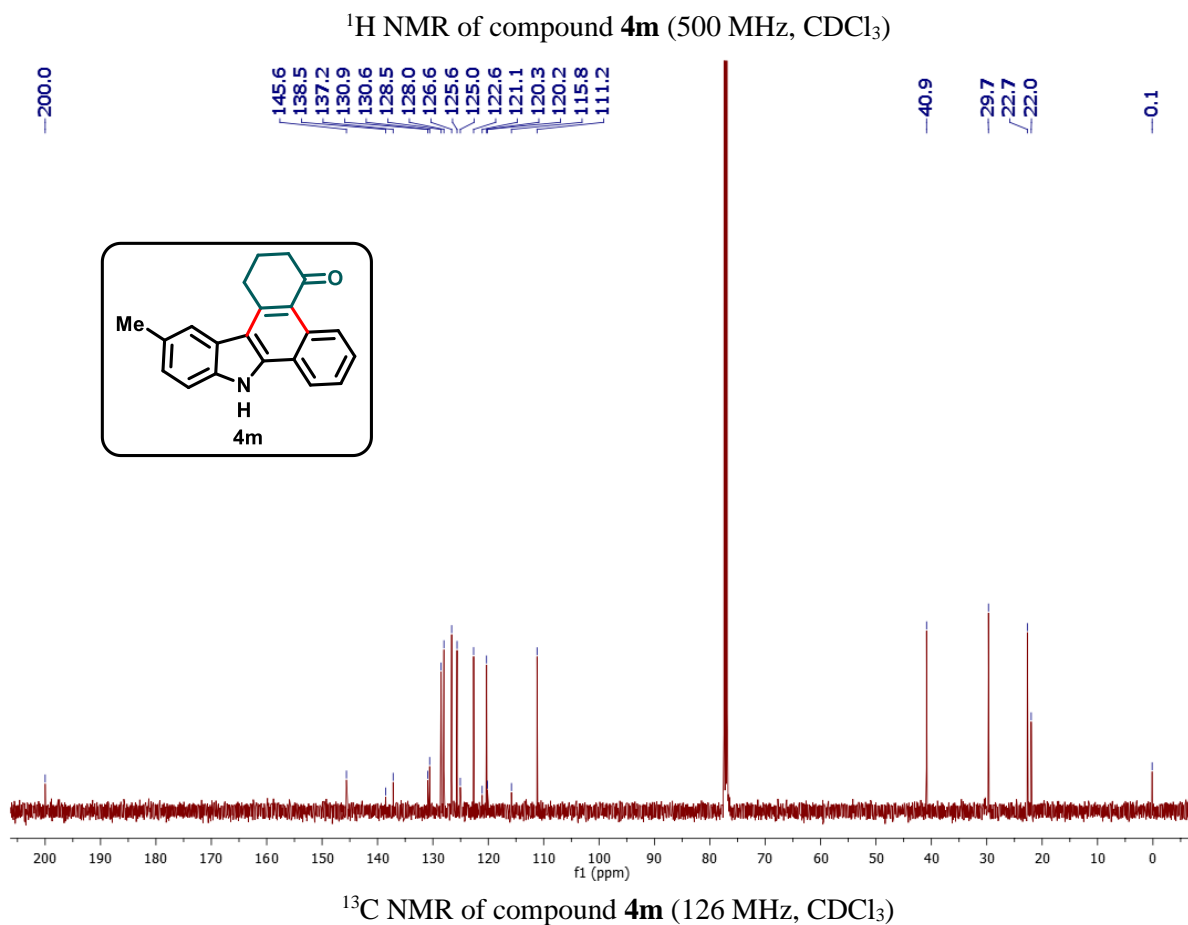

### 12-methoxy-1,2,3,9-tetrahydro-4*H*-dibenzo[*a,c*]carbazol-4-one (4n):

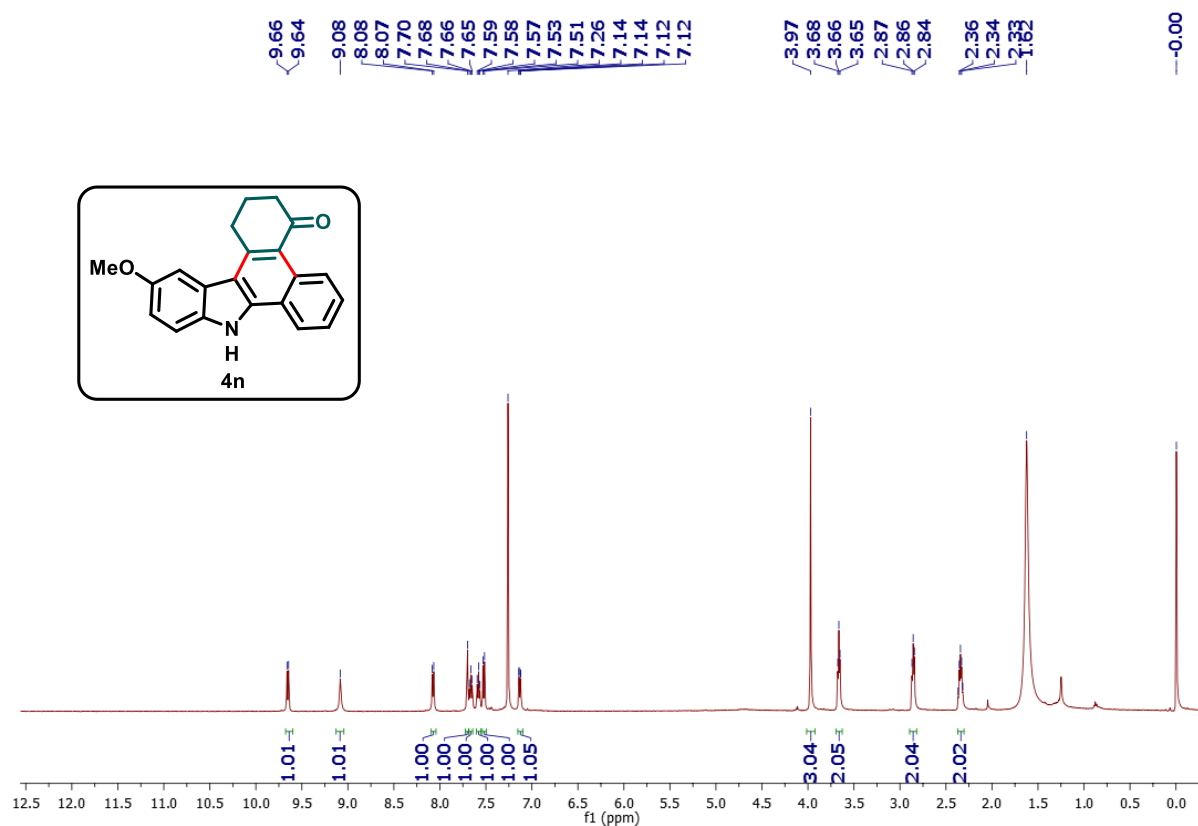

**<sup>1</sup>H NMR of compound 4n (500 MHz, CDCl<sub>3</sub>)**

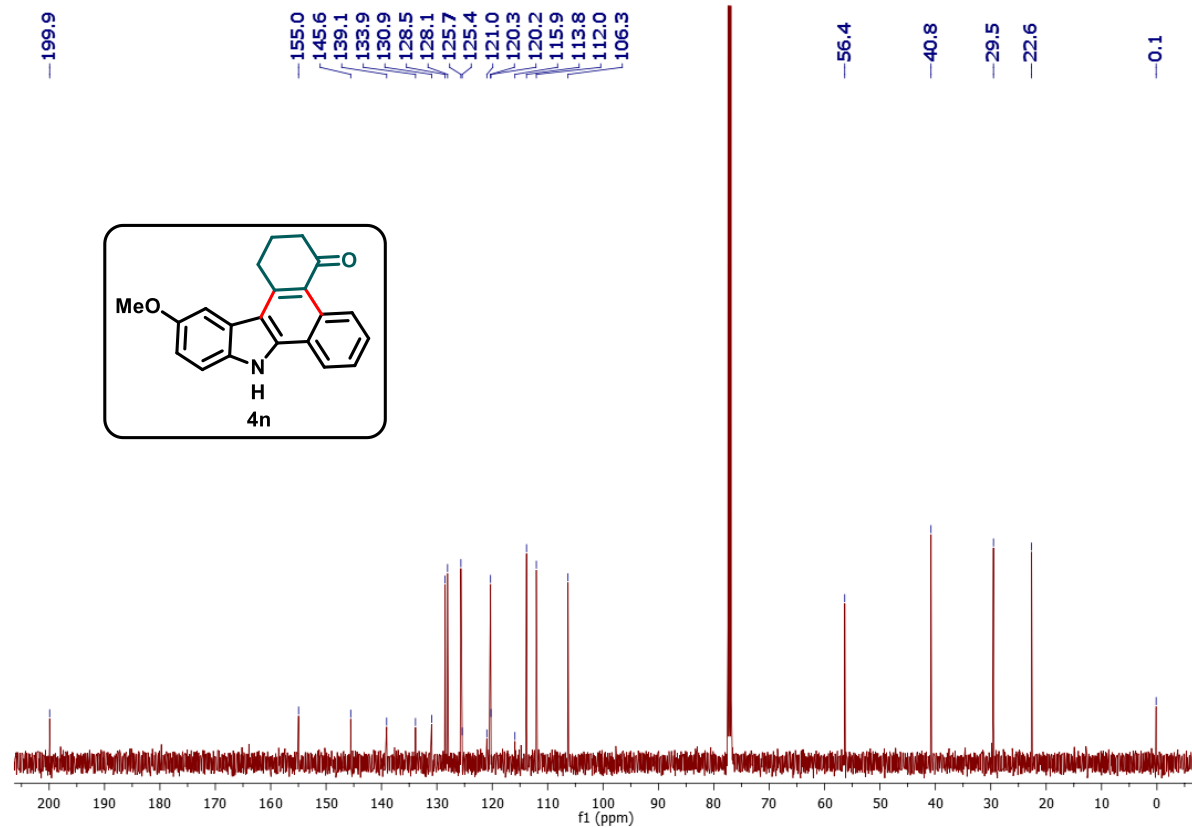

**<sup>13</sup>C NMR of compound 4n (126 MHz, CDCl<sub>3</sub>)**

**11-chloro-1,2,3,9-tetrahydro-4*H*-dibenzo[*a,c*]carbazol-4-one (4o):**

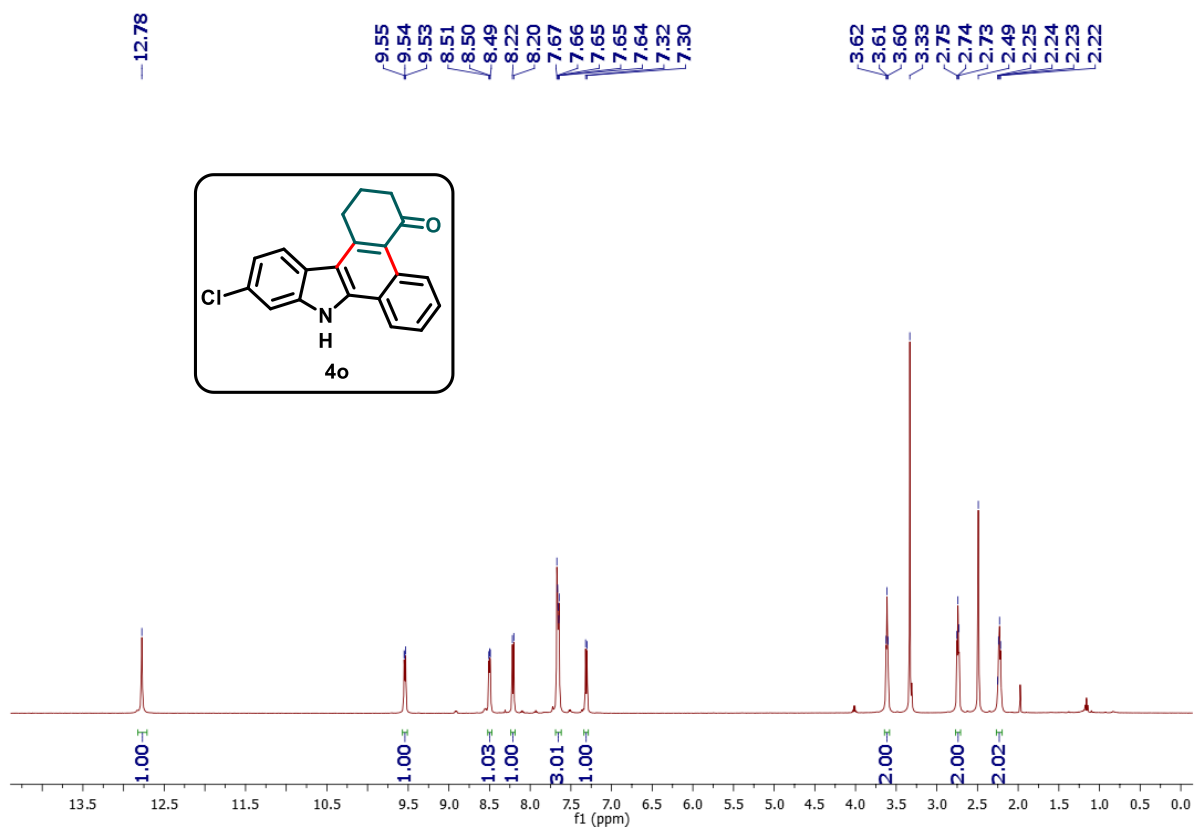

<sup>1</sup>H NMR of compound **4o** (500 MHz, DMSO-*d*<sub>6</sub>)

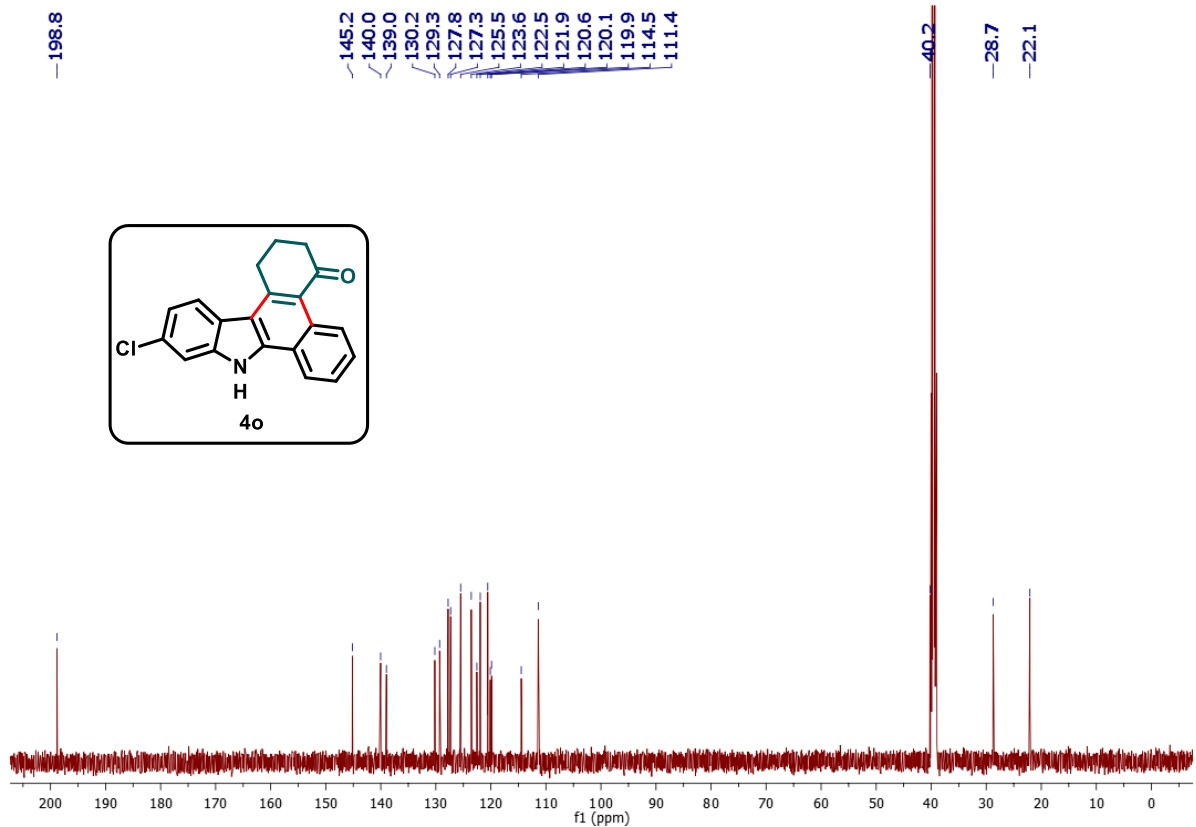

<sup>13</sup>C NMR of compound **4o** (126 MHz, DMSO-*d*<sub>6</sub>)

**3-methyl-1,2,3,9-tetrahydro-4H-dibenzo[*a,c*]carbazol-4-one (4p):**

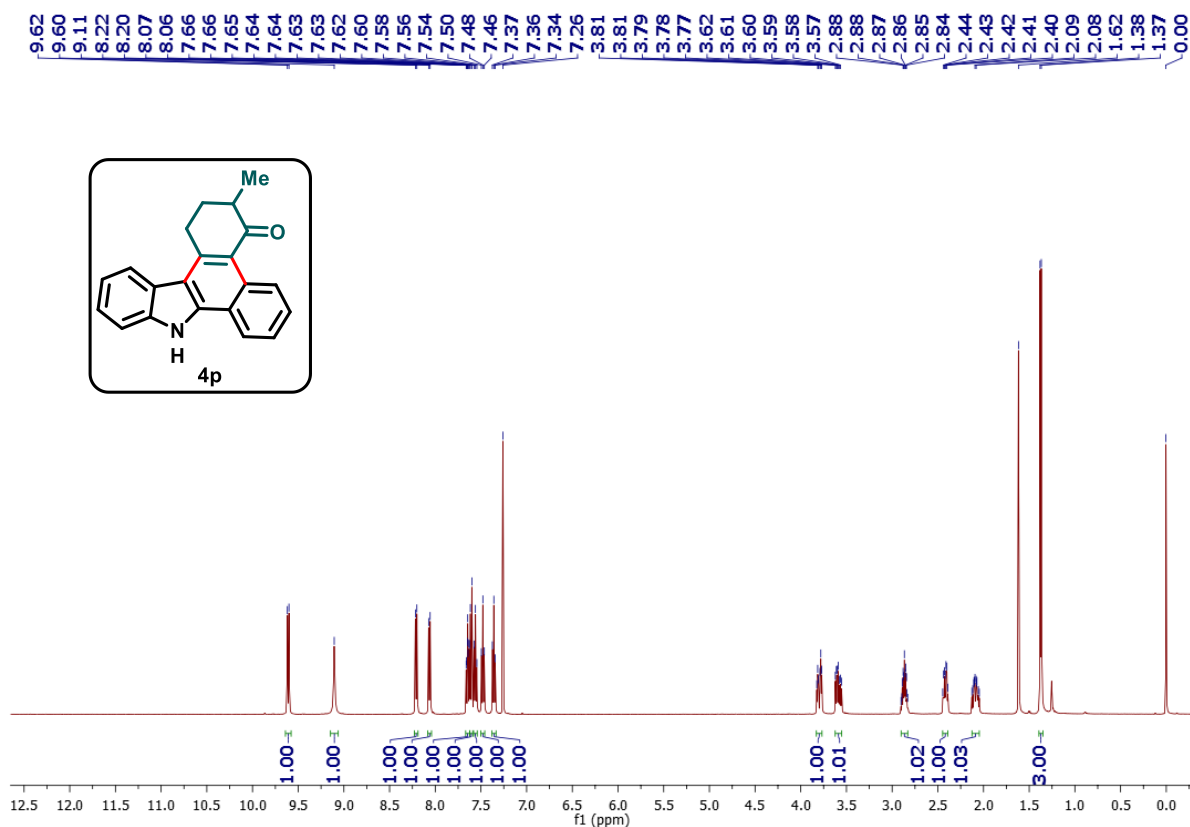

<sup>1</sup>H NMR of compound **4p** (500 MHz, CDCl<sub>3</sub>)

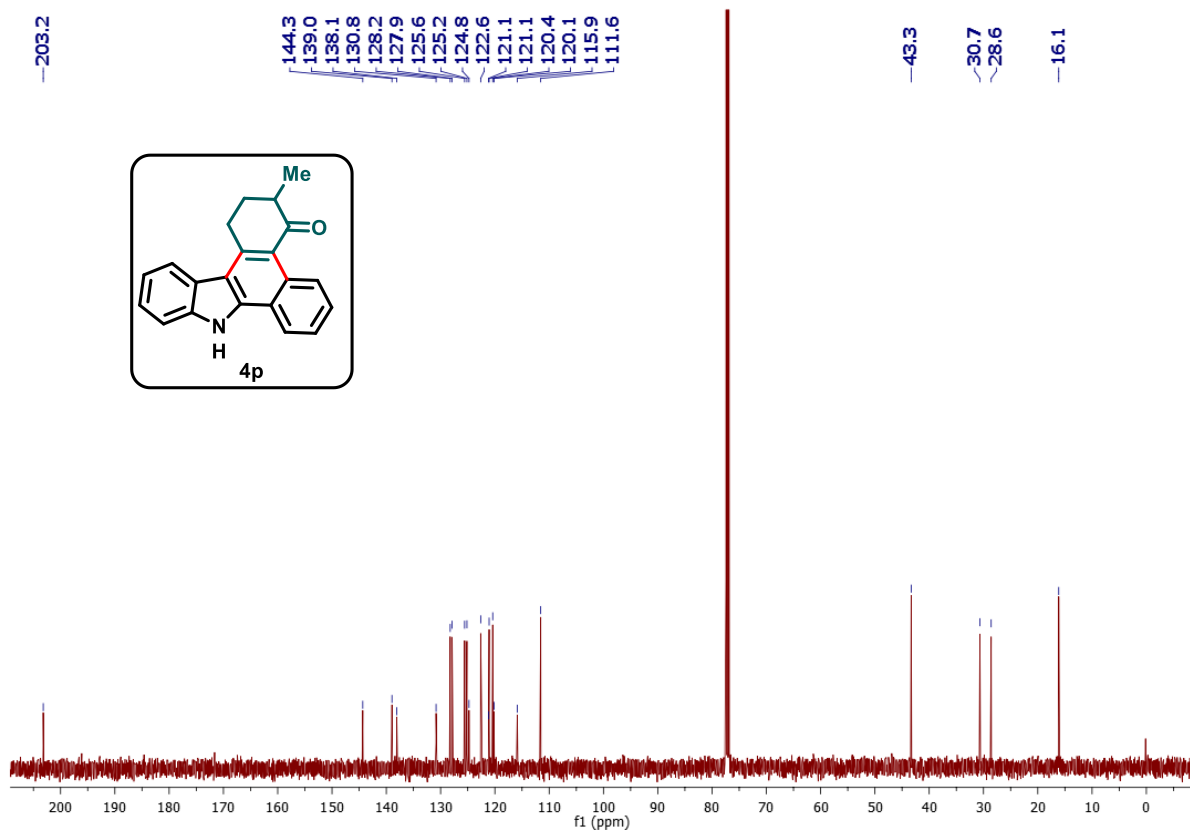

<sup>13</sup>C NMR of compound **4p** (126 MHz, CDCl<sub>3</sub>)

2-methyl-1,2,3,9-tetrahydro-4*H*-dibenzo[*a,c*]carbazol-4-one (**4q**):

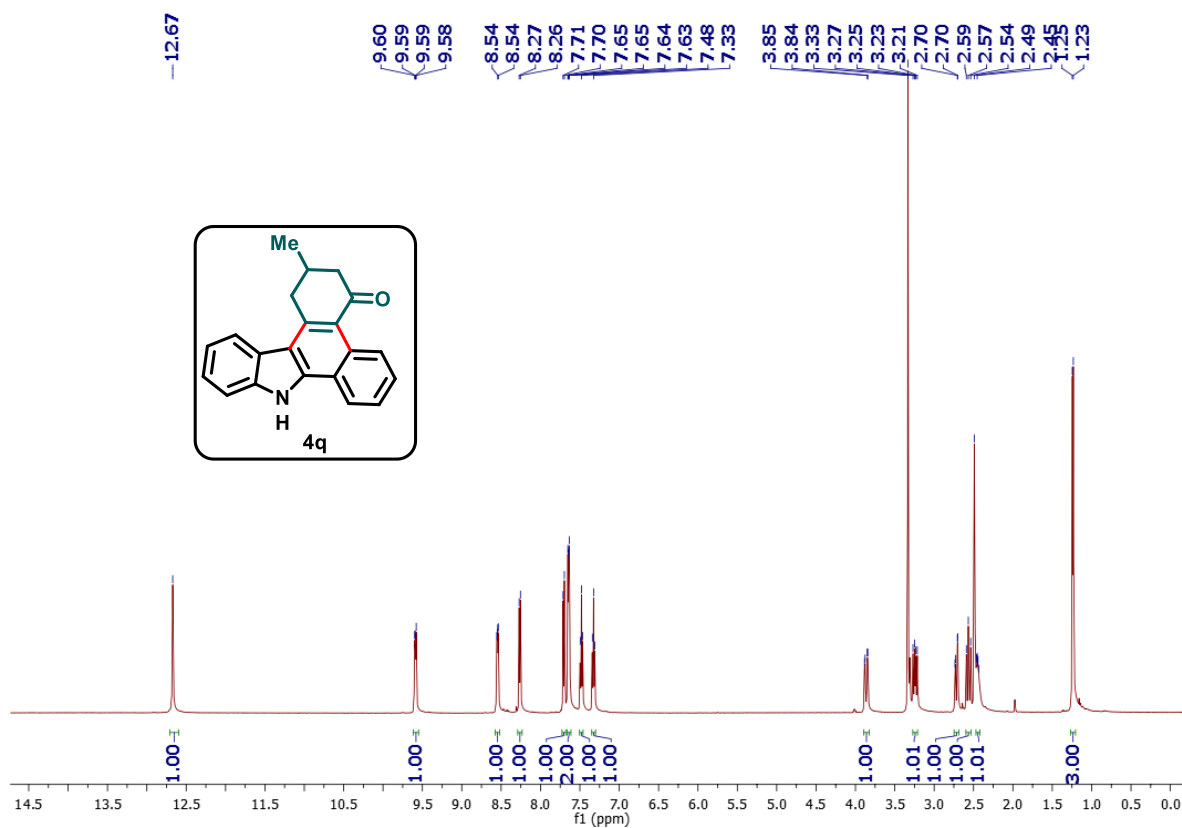

<sup>1</sup>H NMR of compound **4q** (500 MHz, DMSO-*d*<sub>6</sub>)

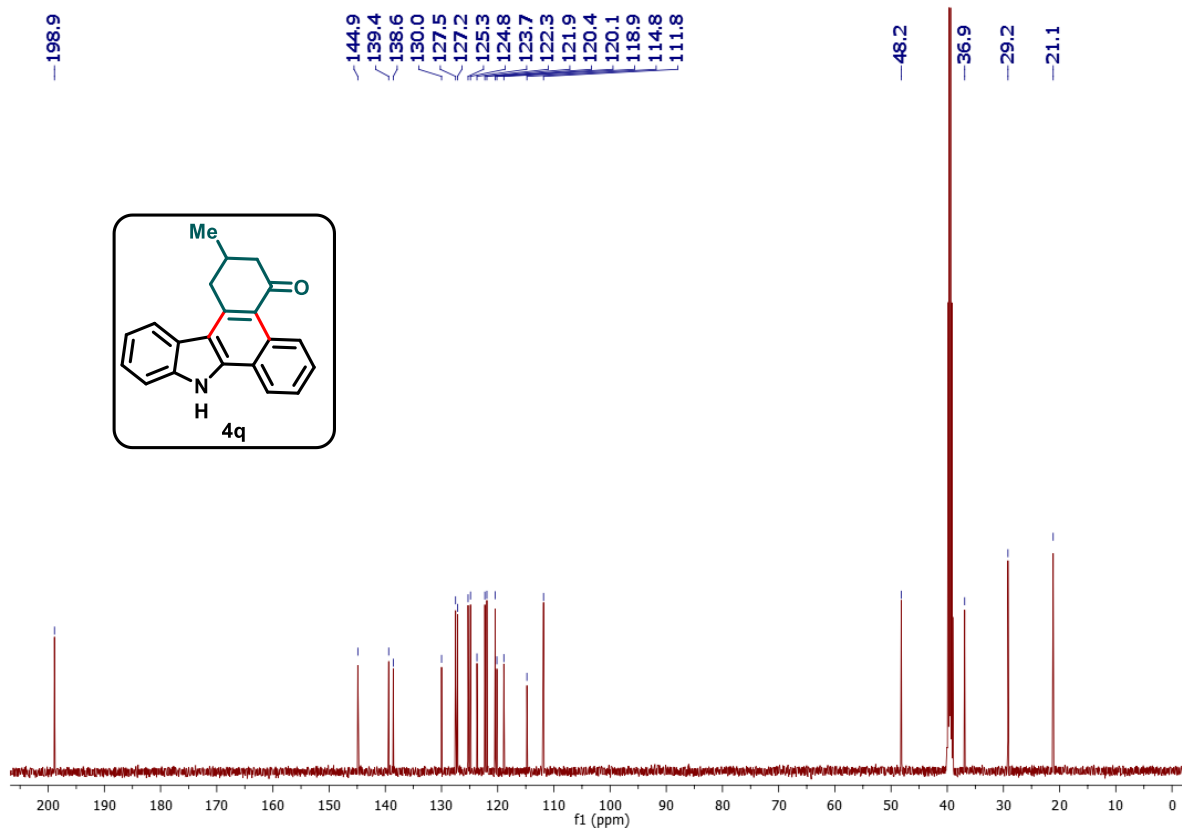

<sup>13</sup>C NMR of compound **4q** (126 MHz, DMSO-*d*<sub>6</sub>)

**2,2-dimethyl-1,2,3,9-tetrahydro-4H-dibenzo[*a,c*]carbazol-4-one (4r):**

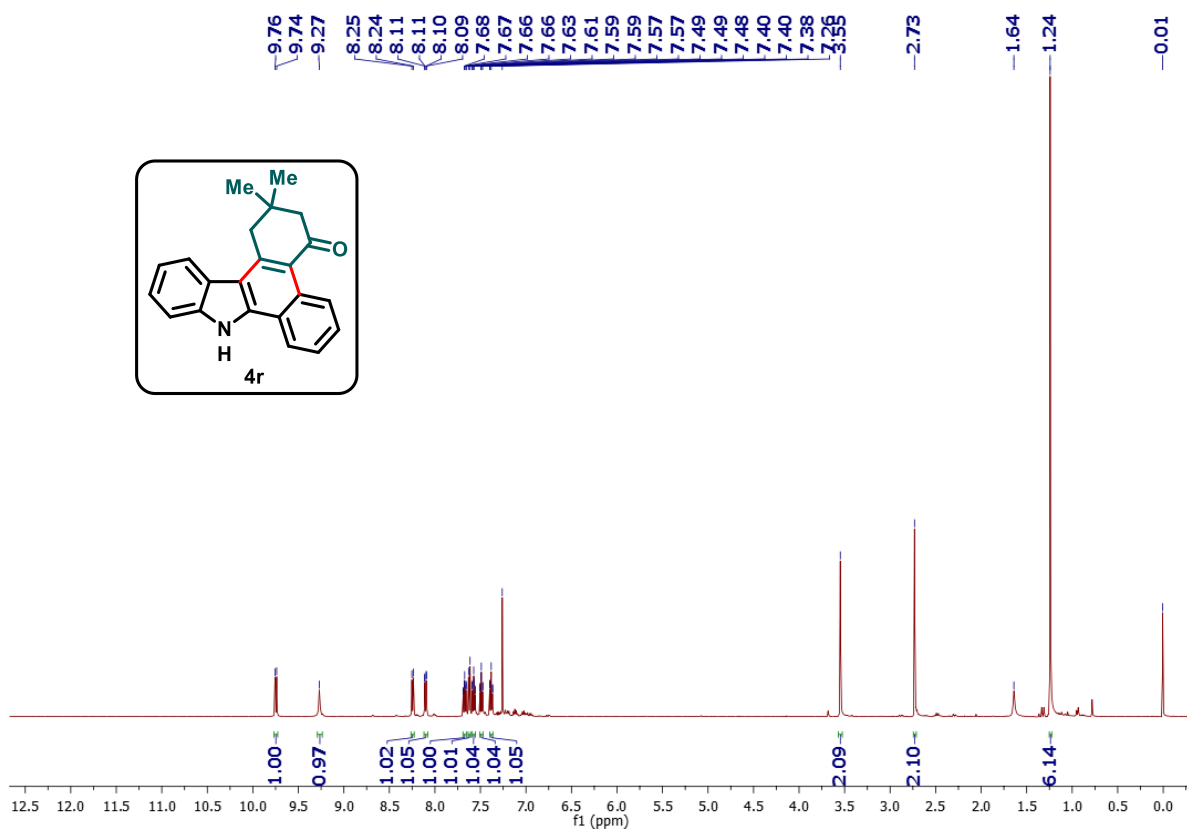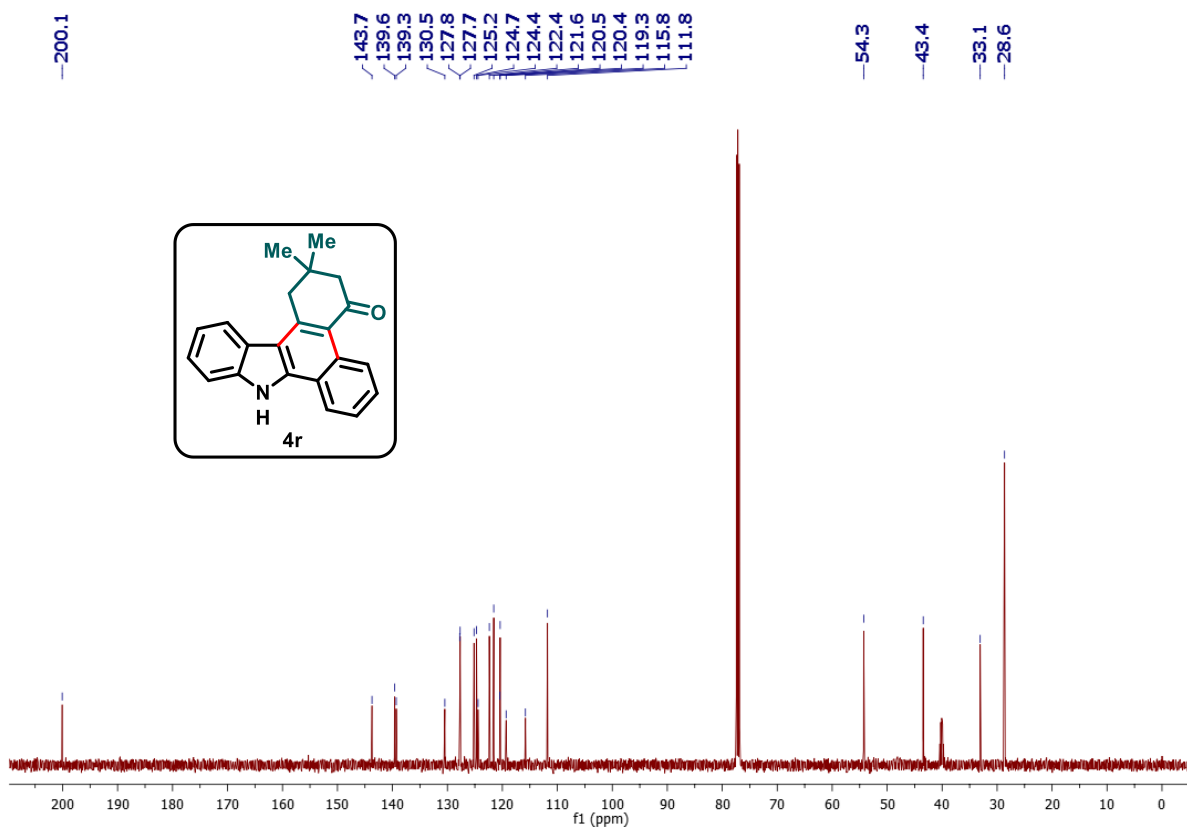

2-pentyl-1,2,3,9-tetrahydro-4*H*-dibenzo[*a,c*]carbazol-4-one (4s):

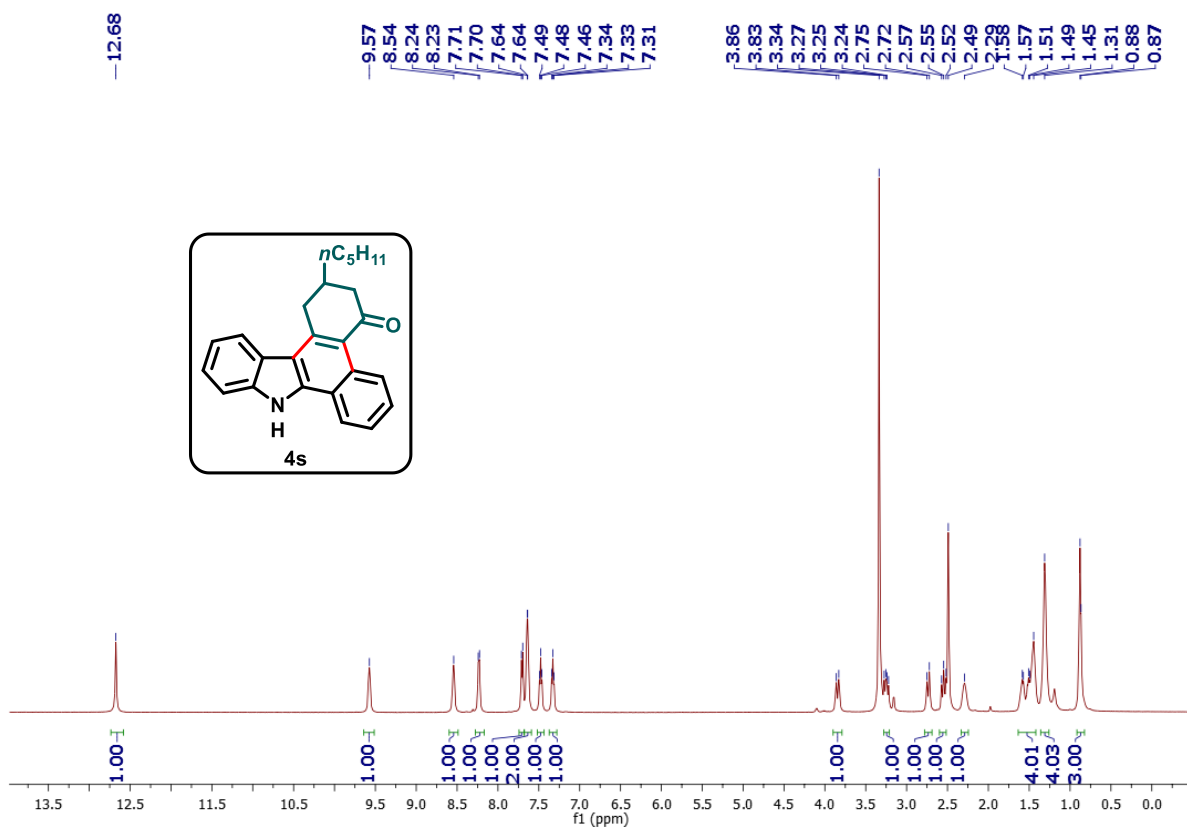

$^1H$  NMR of compound 4s (500 MHz,  $CDCl_3$ )

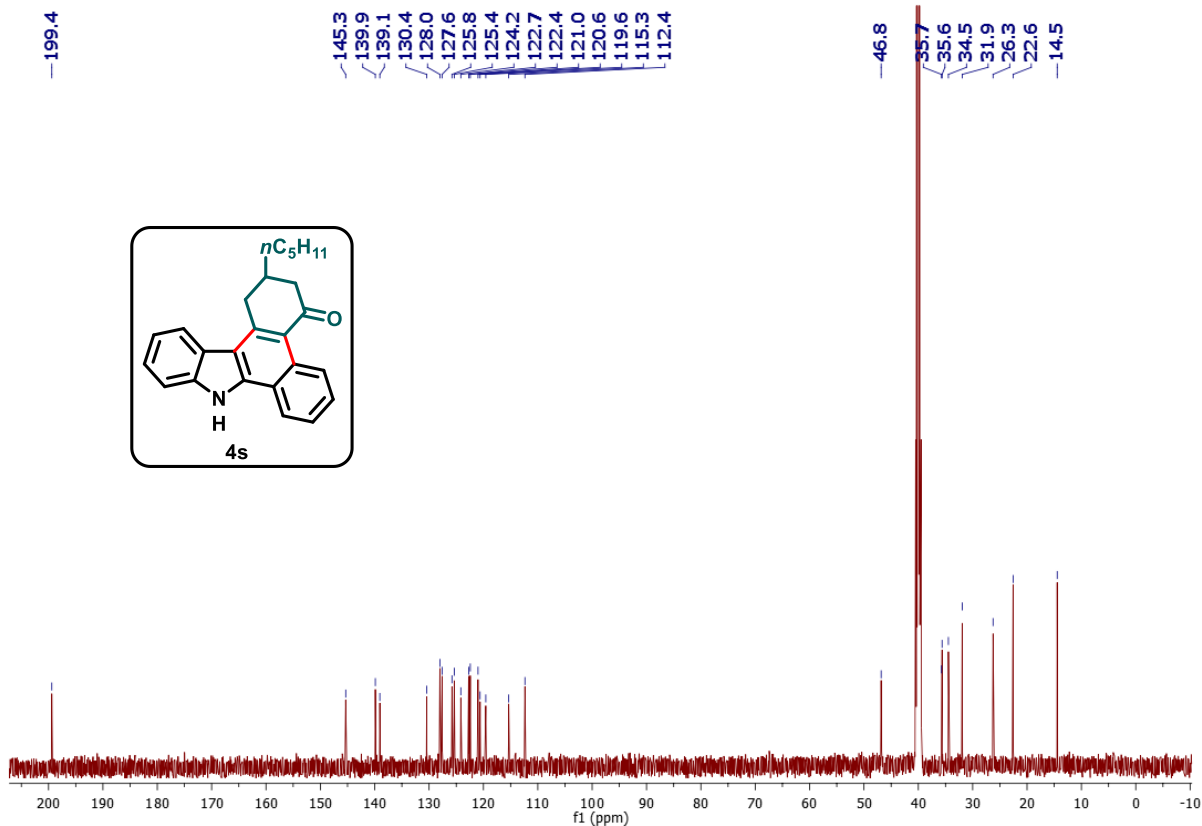

$^{13}C$  NMR of compound 4s (126 MHz,  $DMSO-d_6$ )

2-phenyl-1,2,3,9-tetrahydro-4*H*-dibenzo[*a,c*]carbazol-4-one (**4t**):

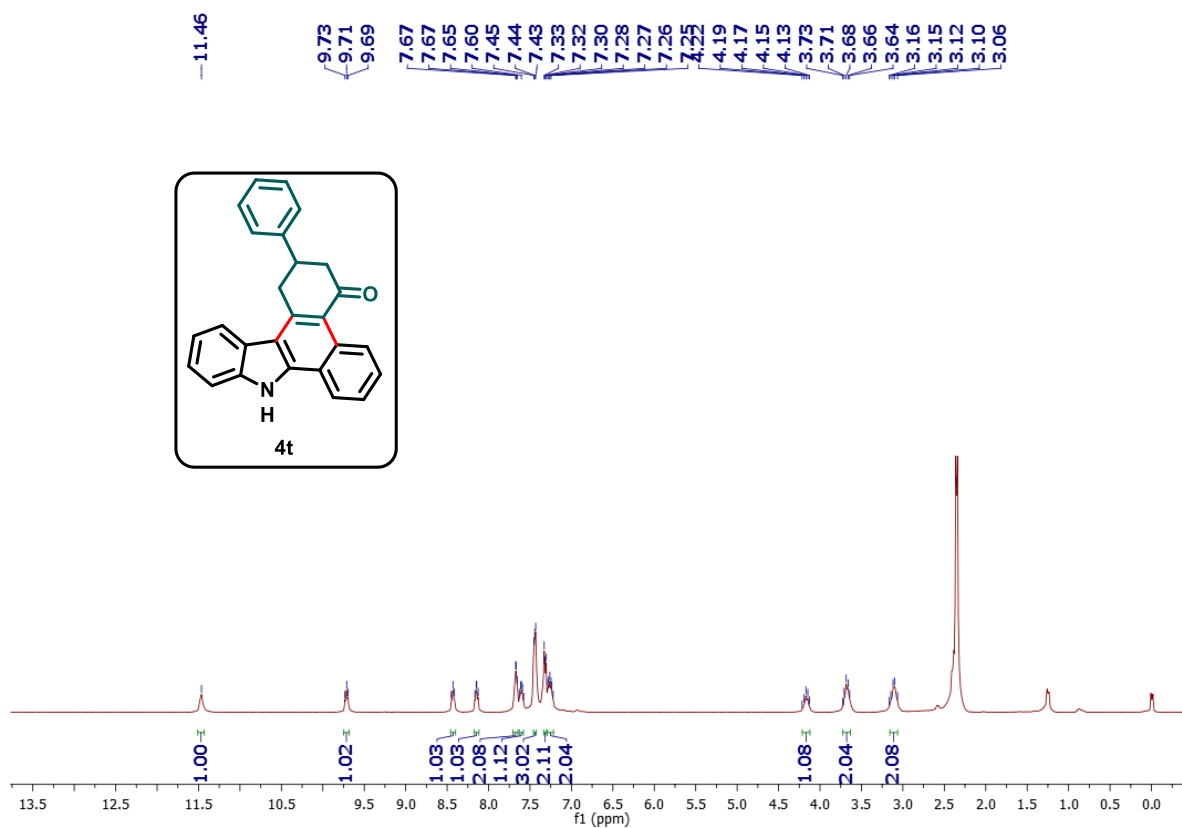

<sup>1</sup>H NMR of compound **4t** (500 MHz, CDCl<sub>3</sub>)

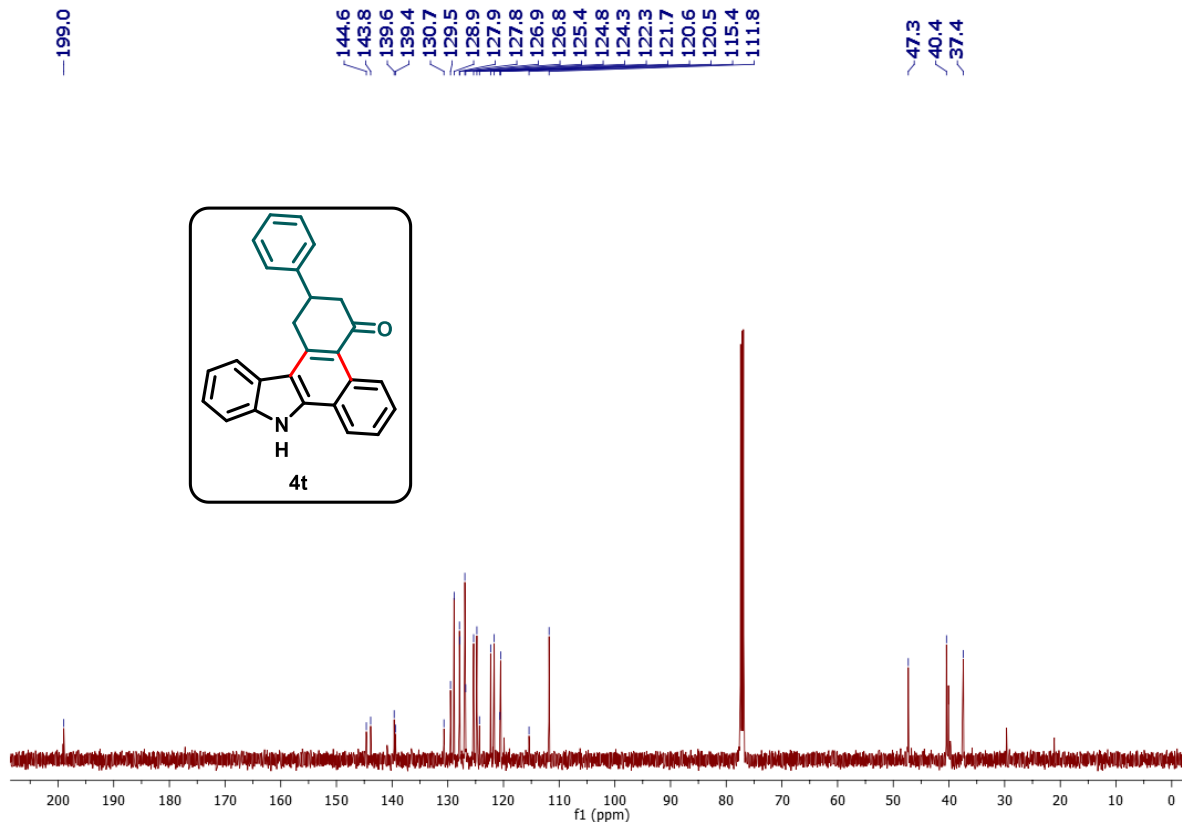

<sup>13</sup>C NMR of compound **4t** (126 MHz, CDCl<sub>3</sub>)



**2-(*p*-tolyl)-1,2,3,9-tetrahydro-4*H*-dibenzo[*a,c*]carbazol-4-one (4u):**

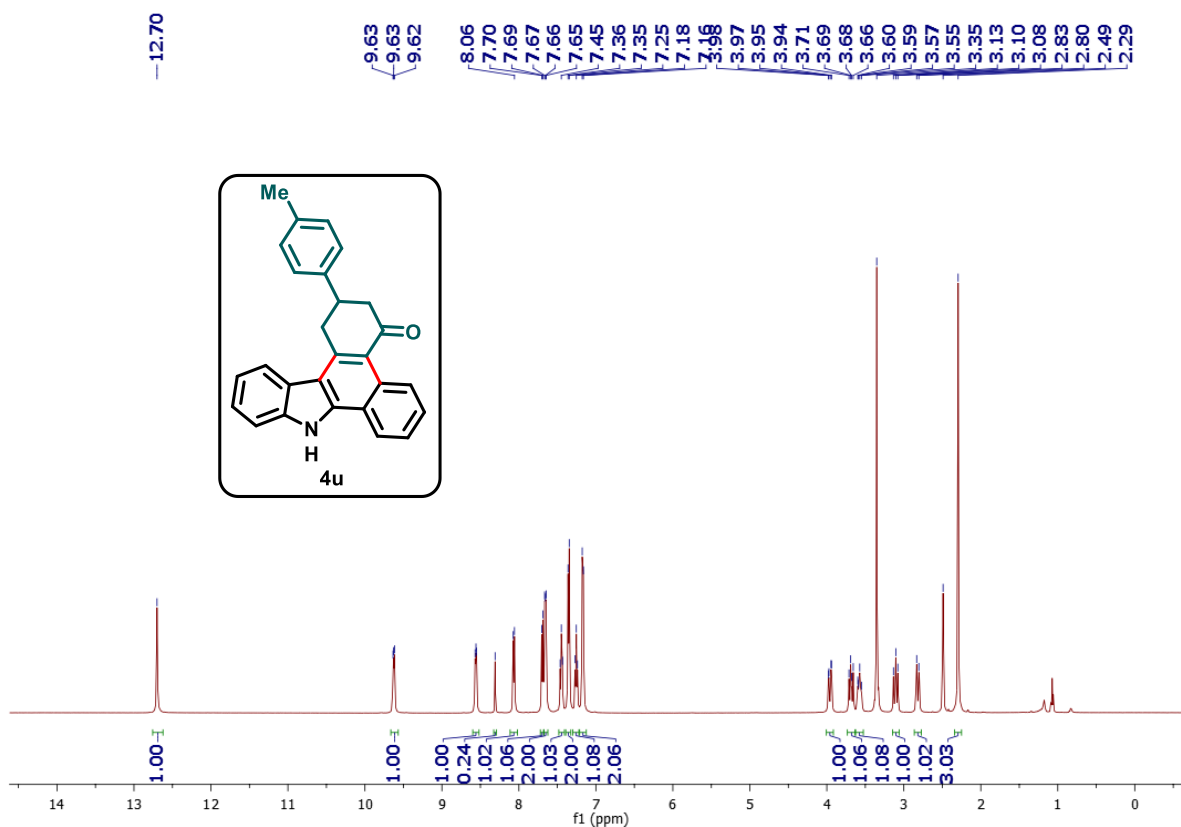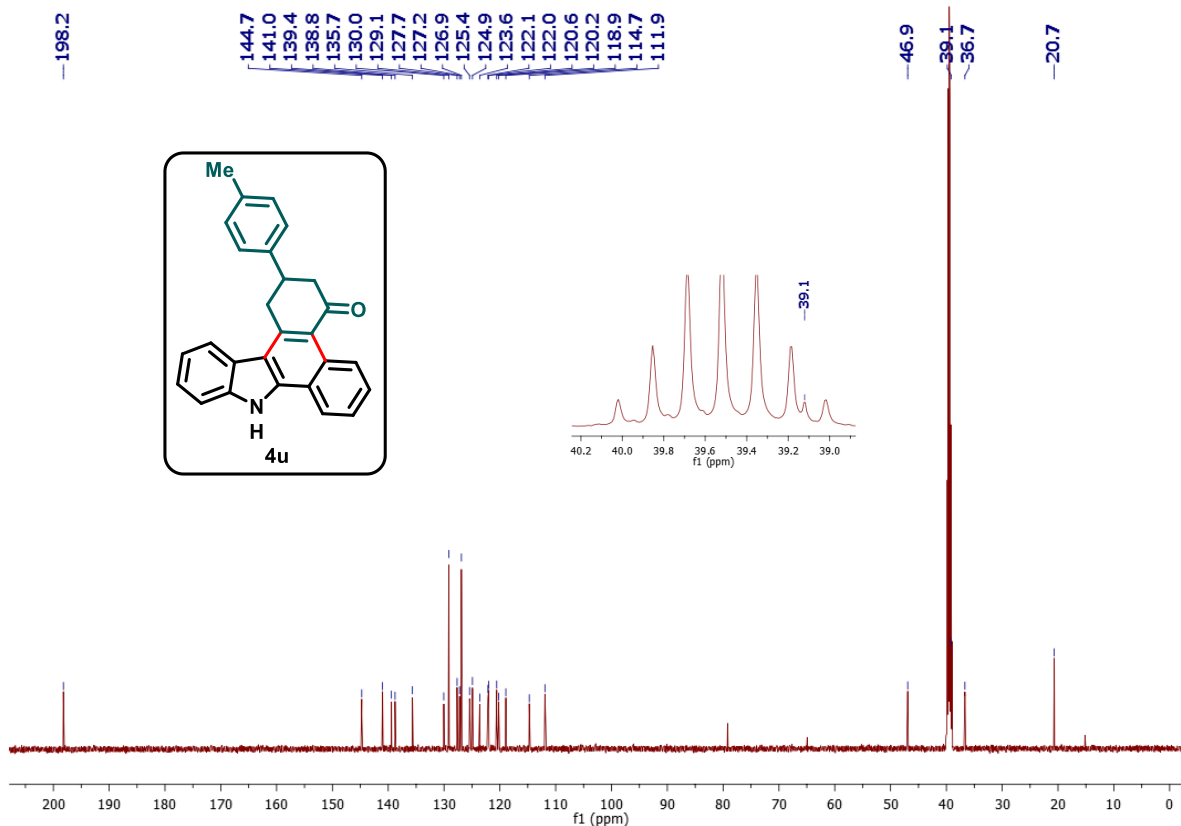

2-(4-methoxyphenyl)-1,2,3,9-tetrahydro-4H-dibenzo[a,c]carbazol-4-one (4v):

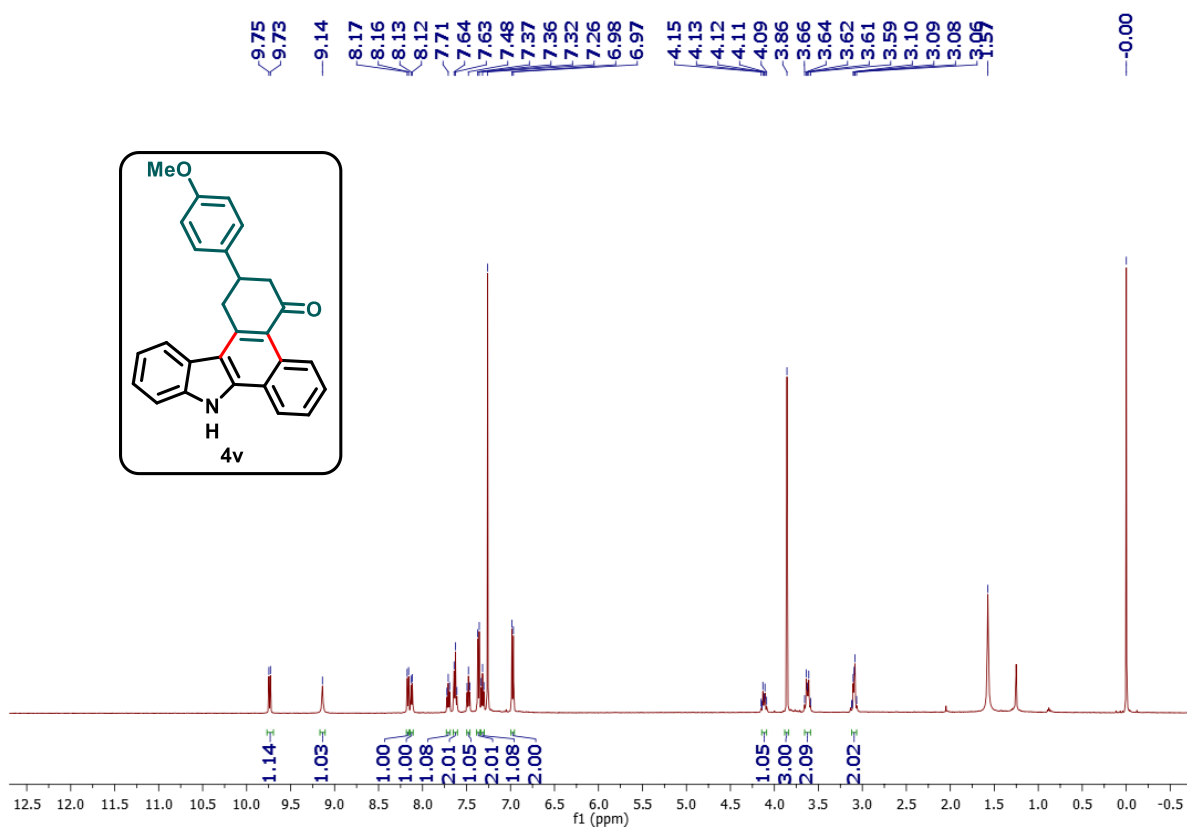

<sup>1</sup>H NMR of compound 4v (500 MHz, CDCl<sub>3</sub>)

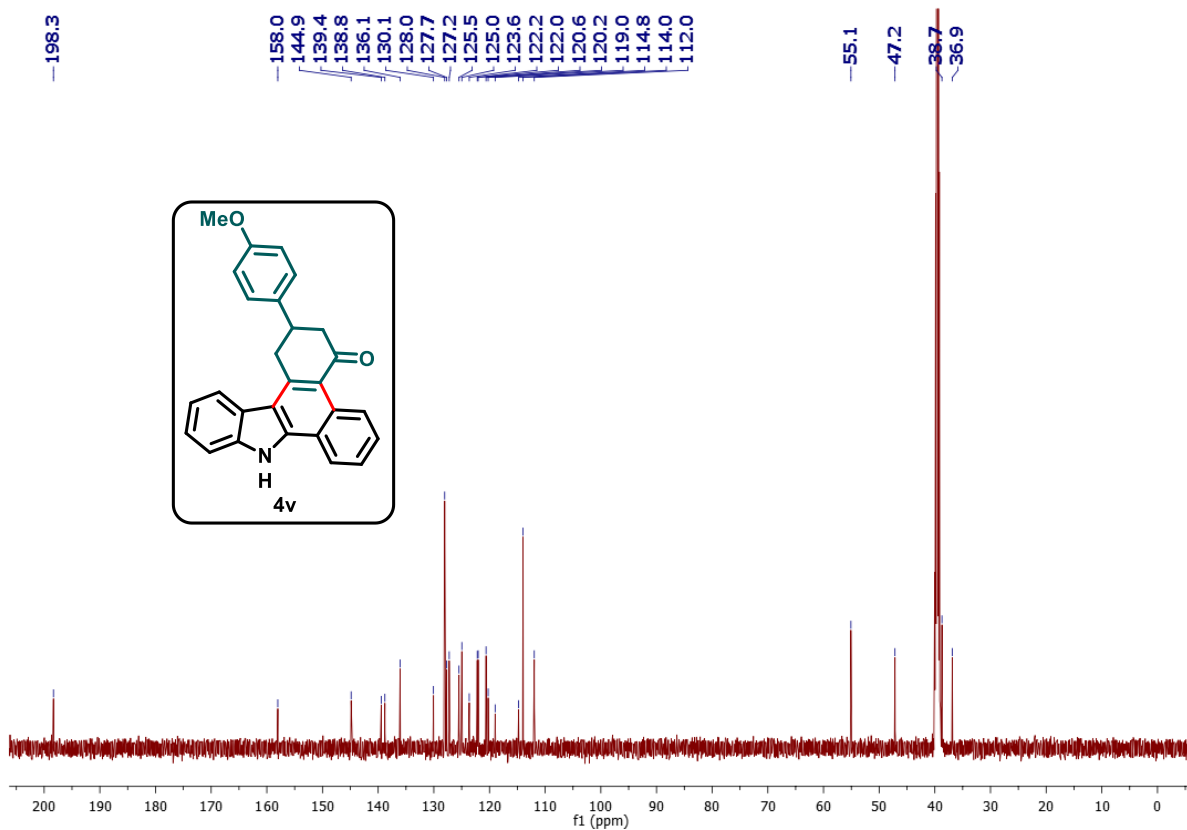

<sup>13</sup>C NMR of compound 4v (126 MHz, DMSO-*d*<sub>6</sub>)

**2-(4-isopropylphenyl)-1,2,3,9-tetrahydro-4H-dibenzo[*a,c*]carbazol-4-one (4w):**

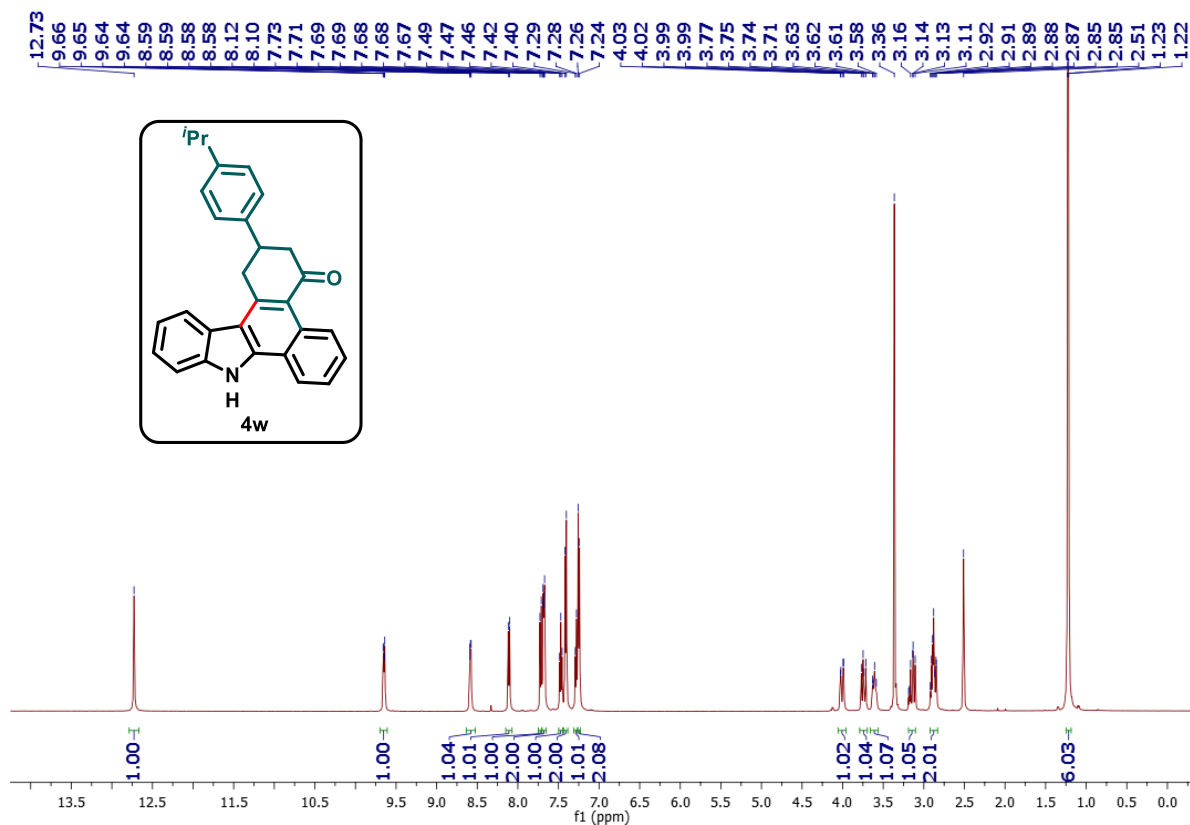

<sup>1</sup>H NMR of compound **4w** (500 MHz, DMSO-*d*<sub>6</sub>)

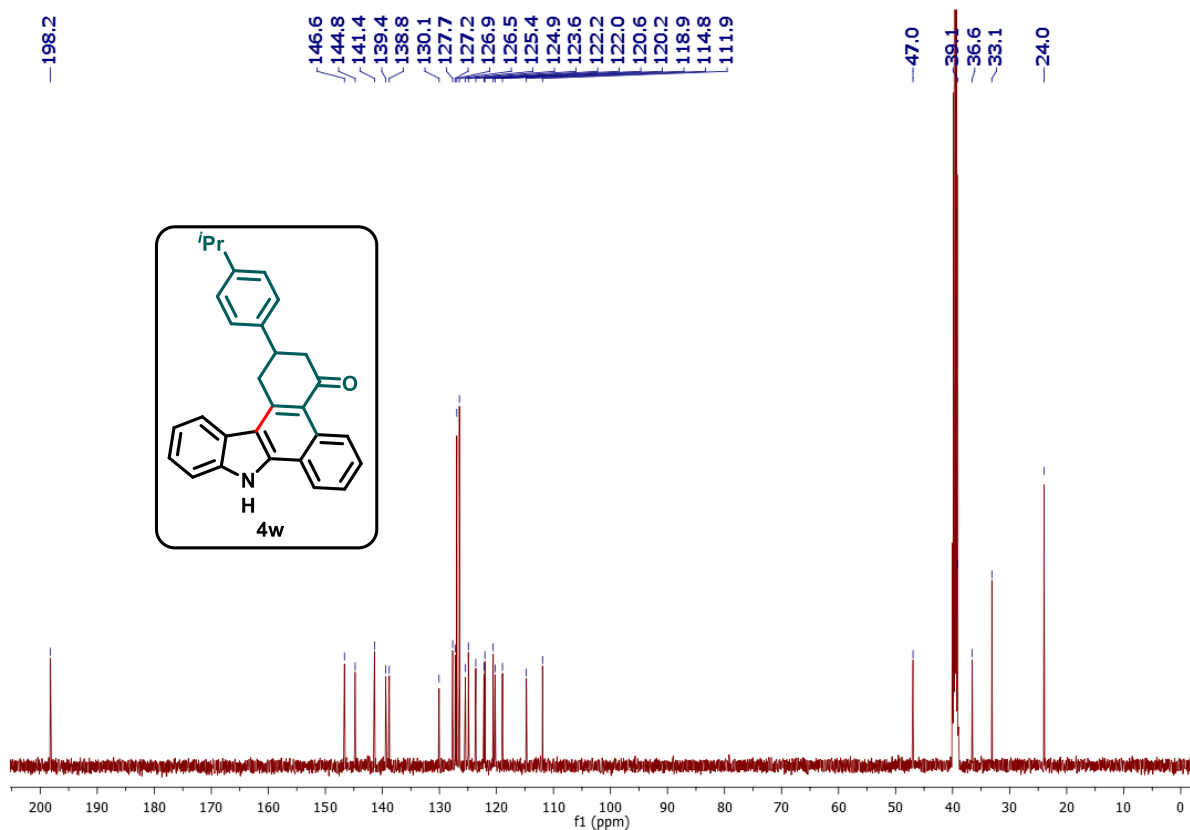

<sup>13</sup>C NMR of compound **4w** (126 MHz, DMSO-*d*<sub>6</sub>)

**2-(4-fluorophenyl)-1,2,3,9-tetrahydro-4H-dibenzo[a,c]carbazol-4-one (4x):**

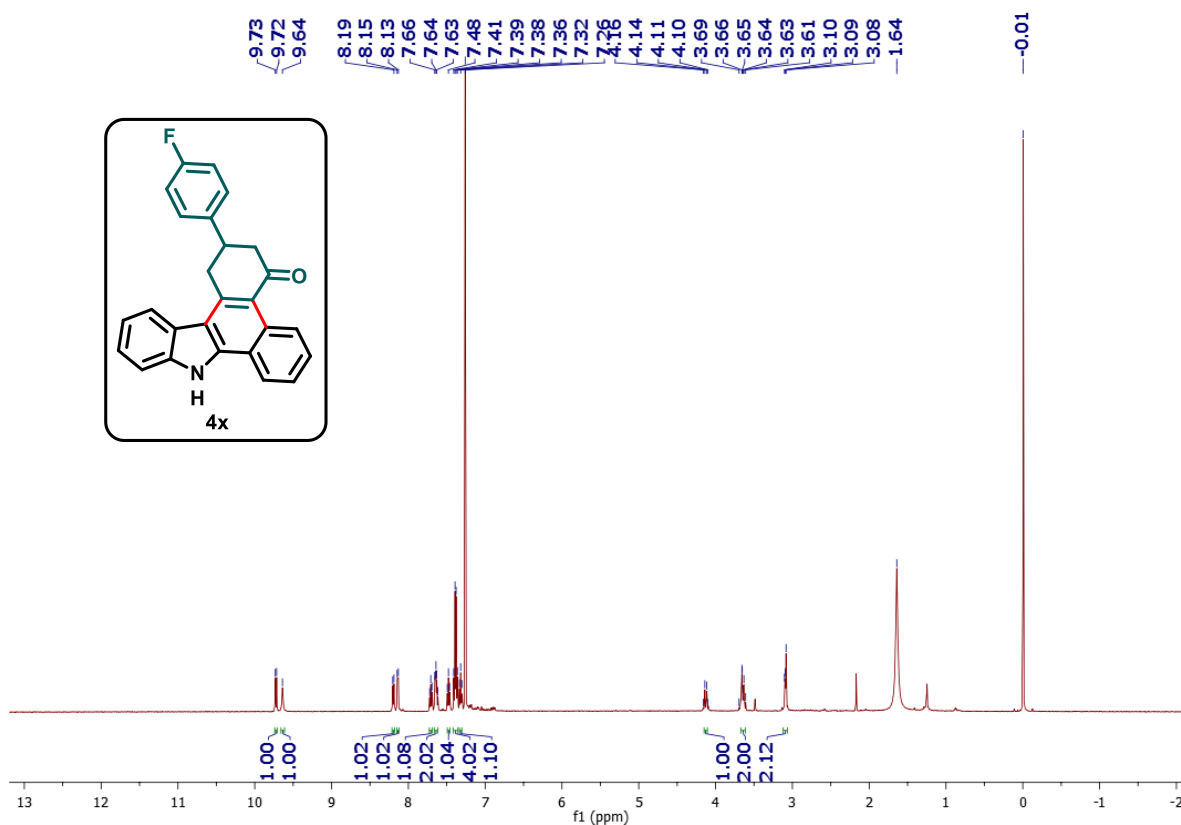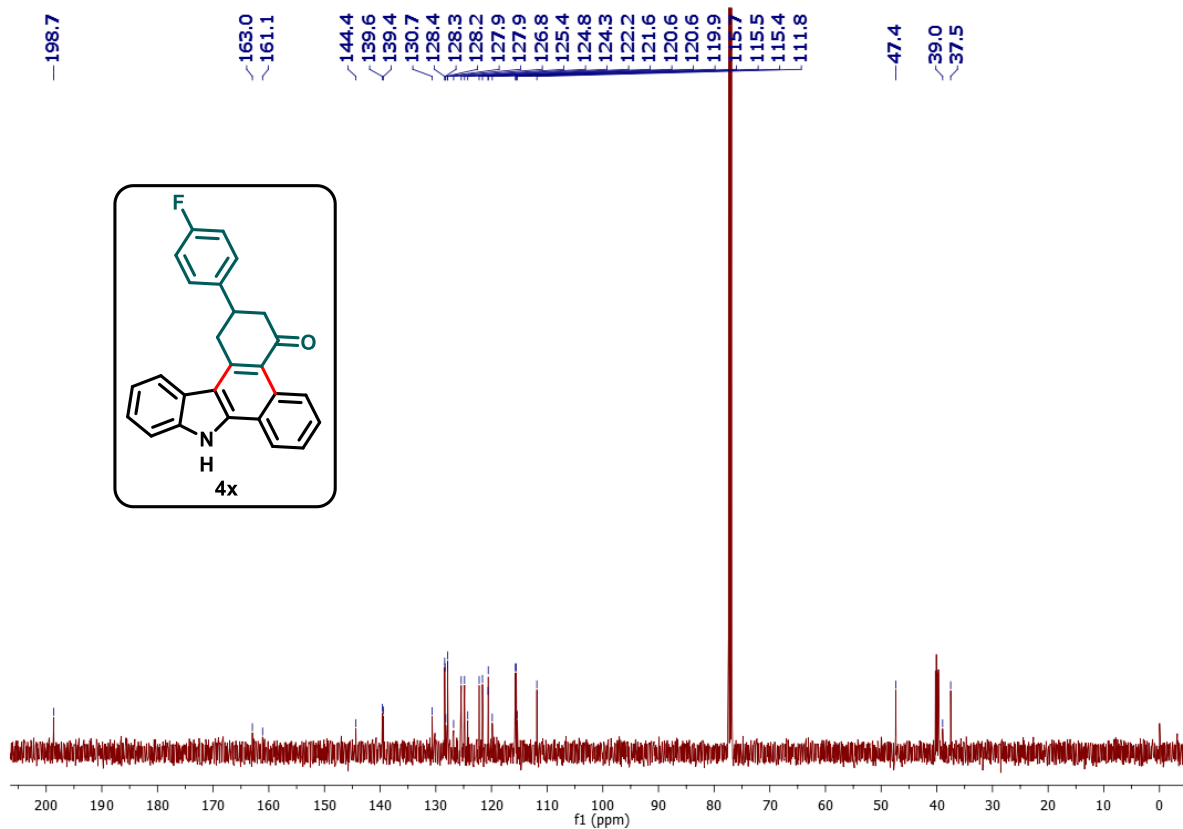

---115.99

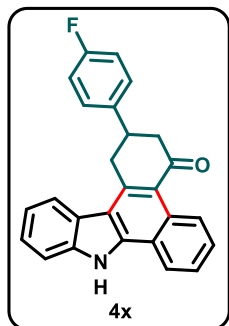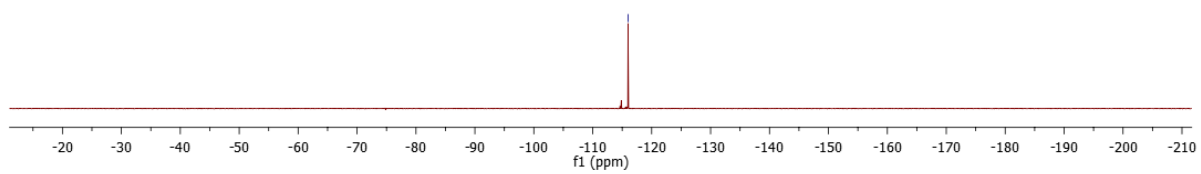

$^{19}\text{F}$  NMR of compound **4x** (470 MHz,  $\text{CDCl}_3$ )

**2-(4-chlorophenyl)-1,2,3,9-tetrahydro-4H-dibenzo[*a,c*]carbazol-4-one (4y):**

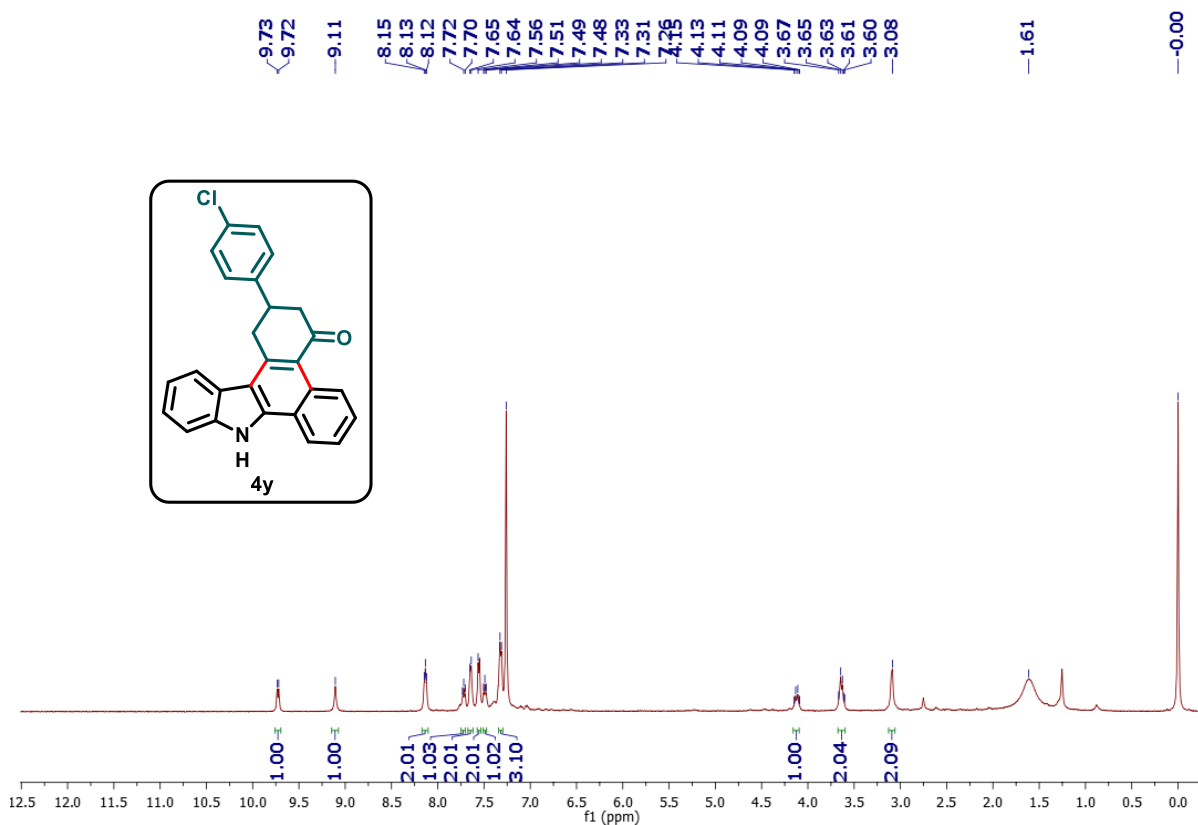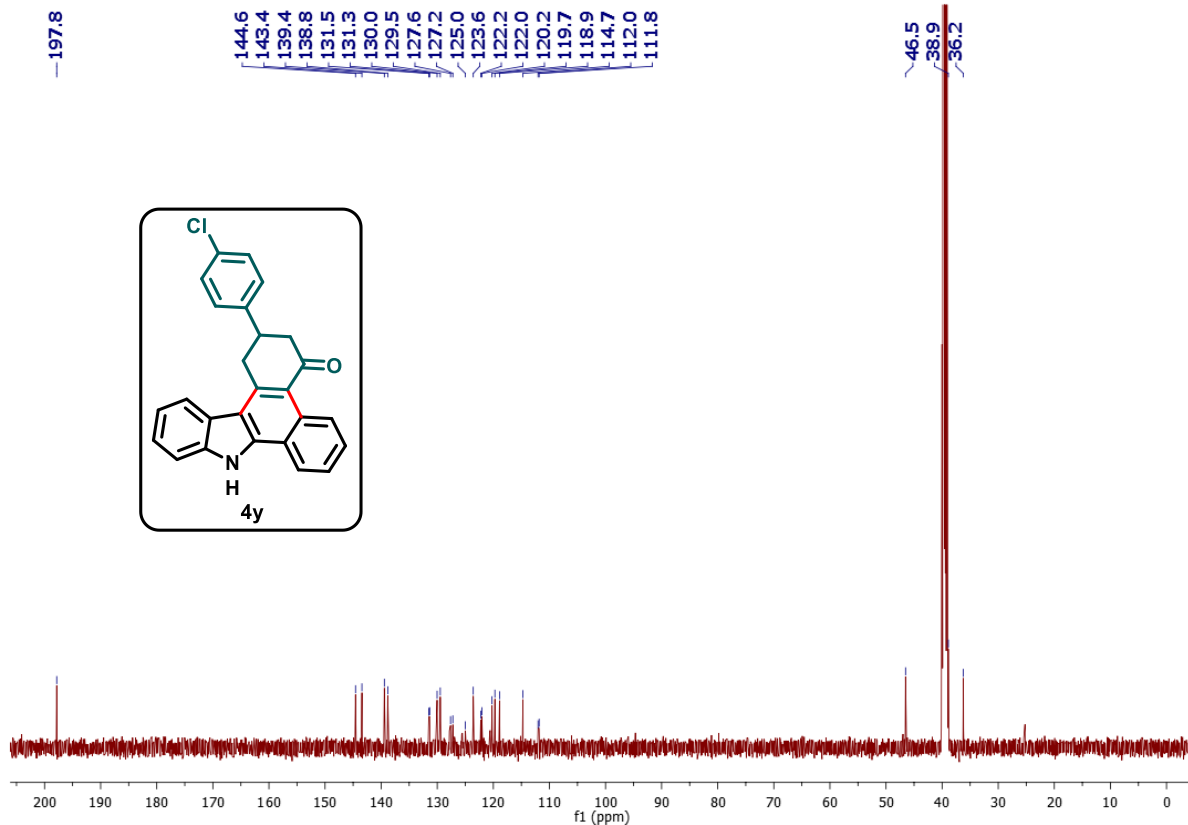

**2-(4-bromophenyl)-1,2,3,9-tetrahydro-4H-dibenzo[*a,c*]carbazol-4-one (4z):**

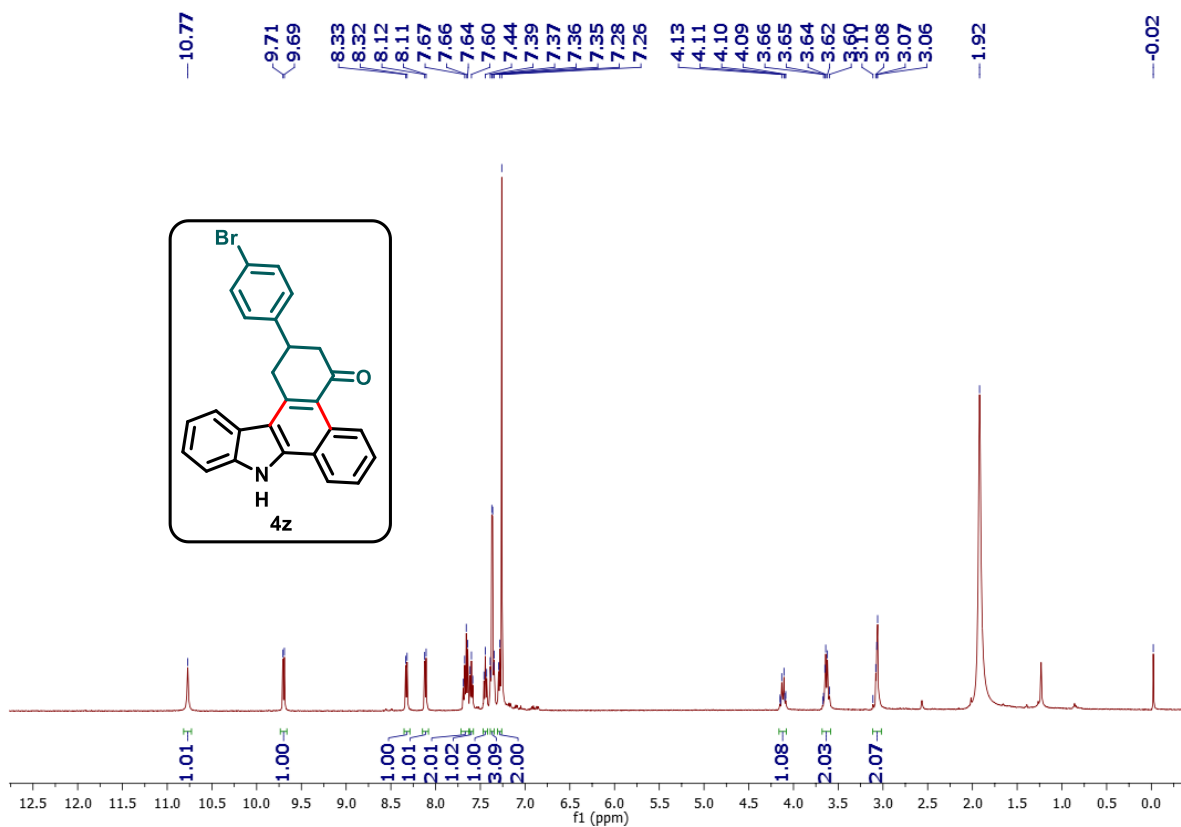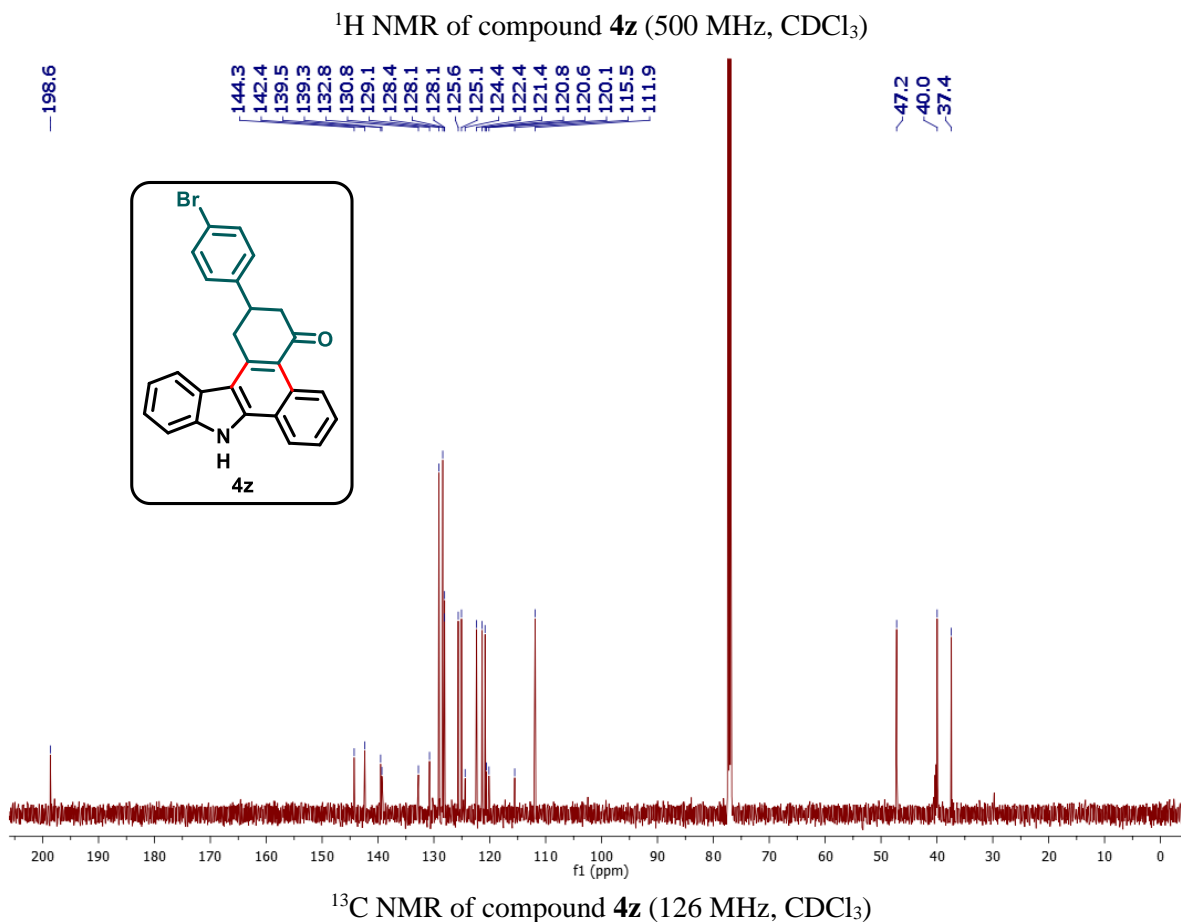

**1,3,4,10-tetrahydrobenzo[*a*]cyclohepta[*c*]carbazol-5(2*H*)-one (4ab):**

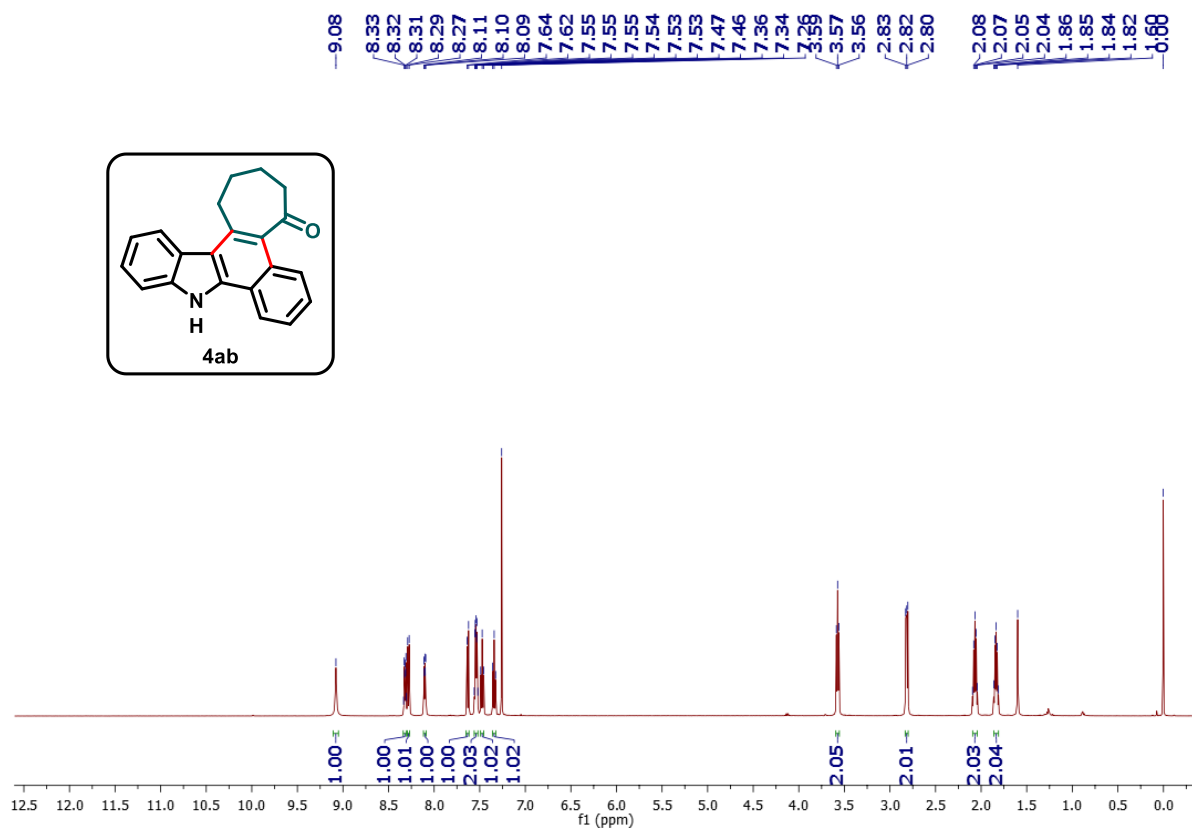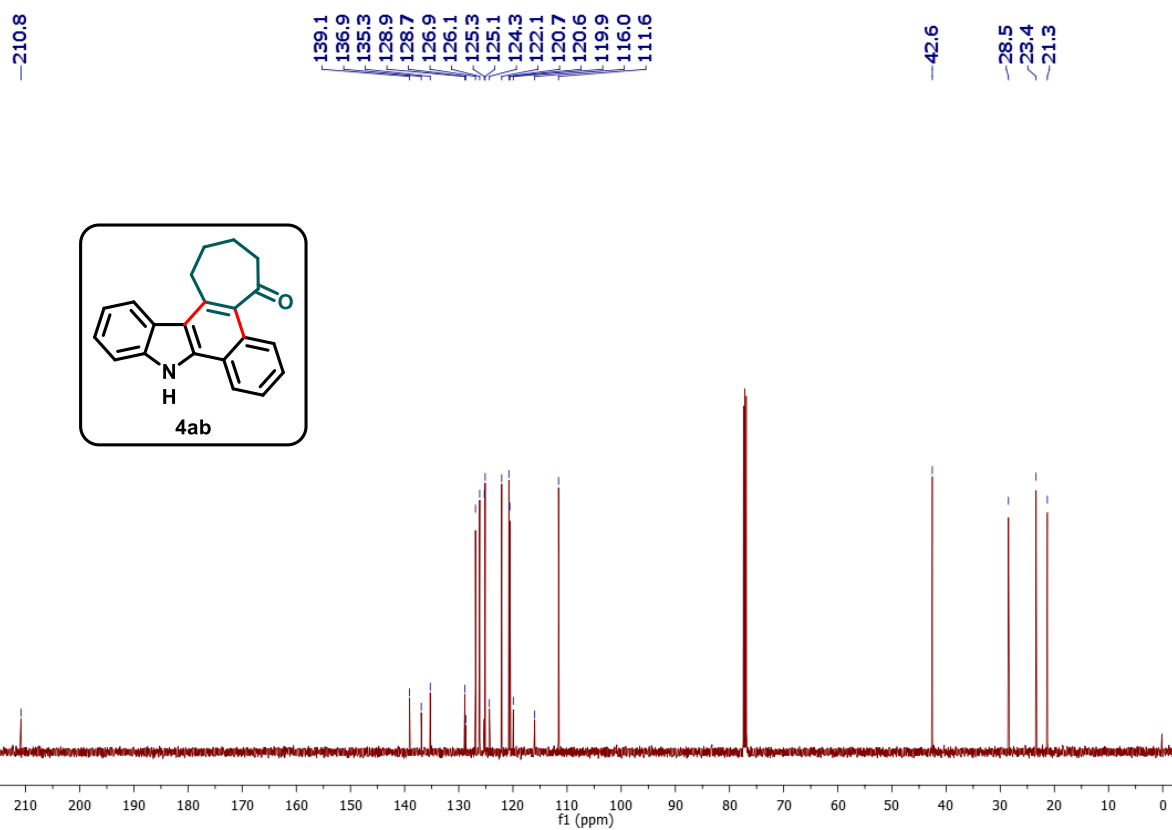



**3-phenyl-7,8-dihydroindolo[1,2-*f*]phenanthridin-5(6*H*)-one (5):**

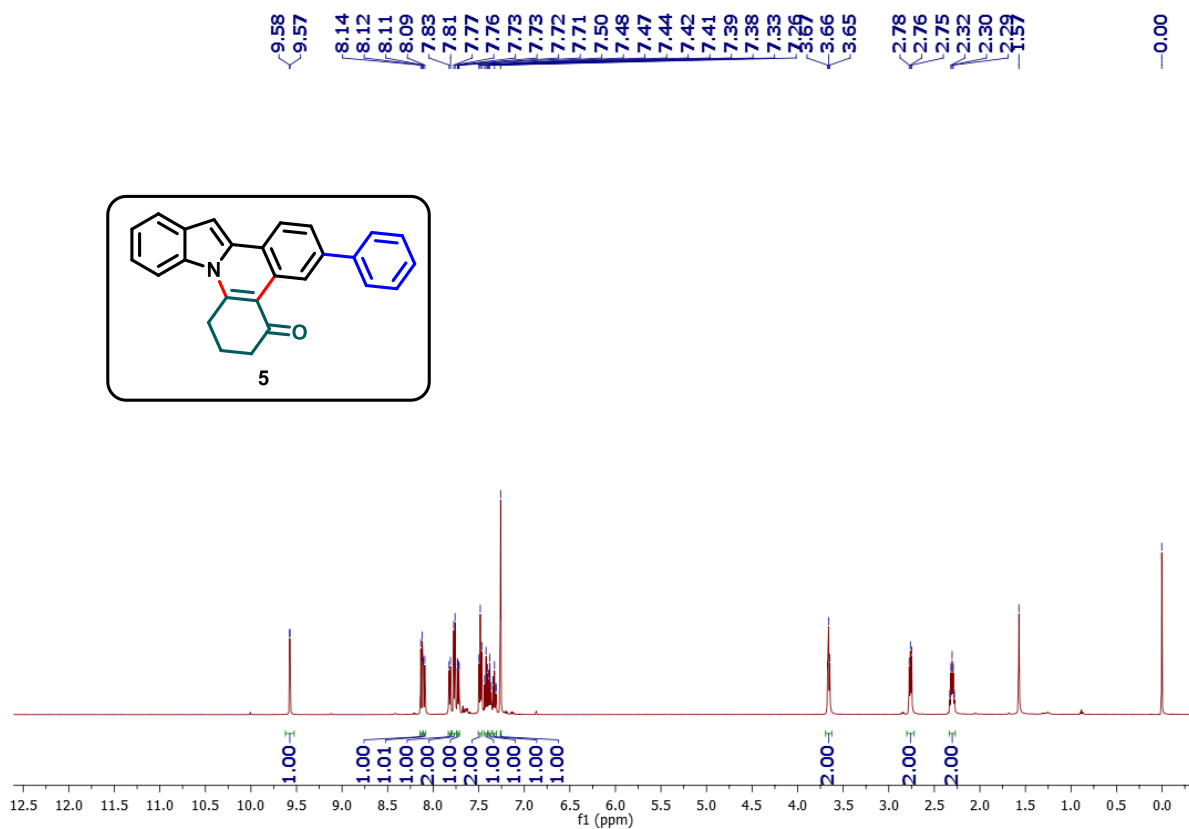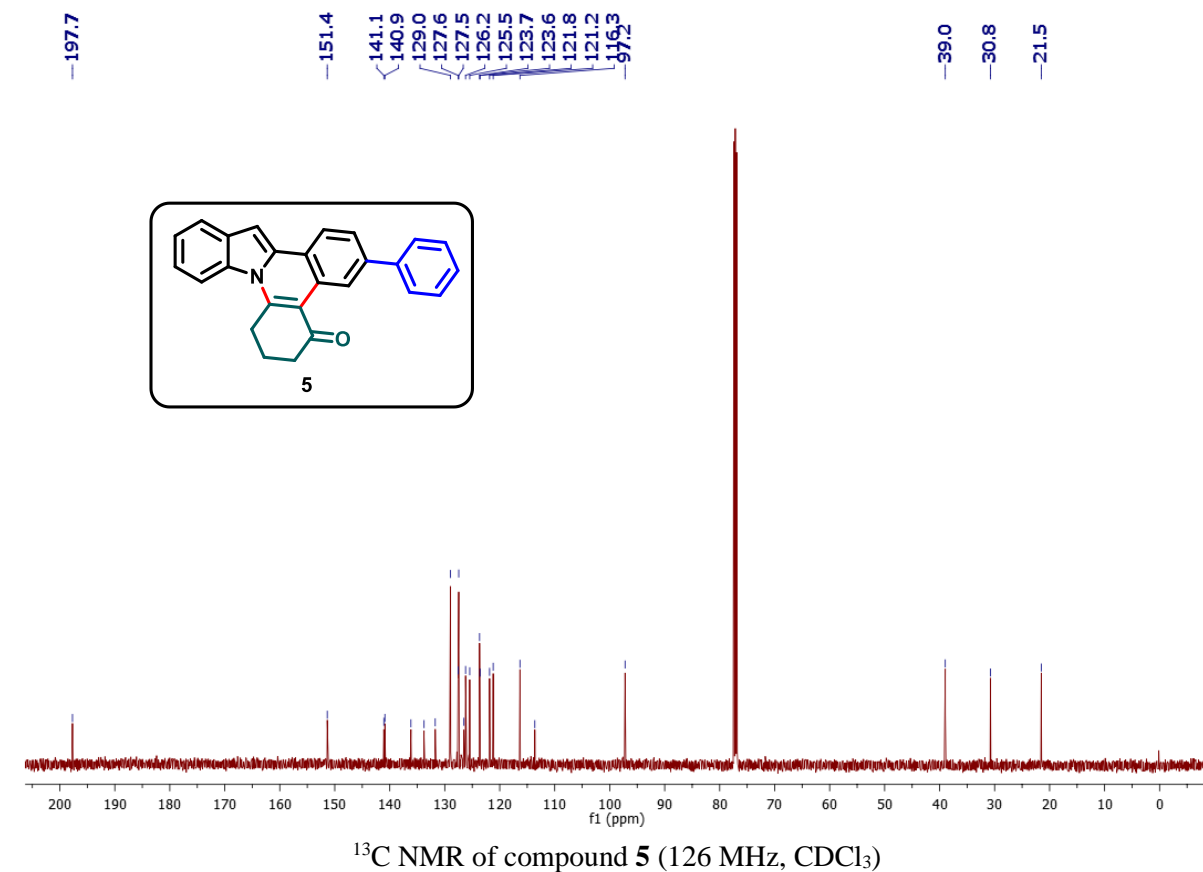

**(E)-3-styryl-7,8-dihydroindolo[1,2-f]phenanthridin-5(6H)-one (6):**

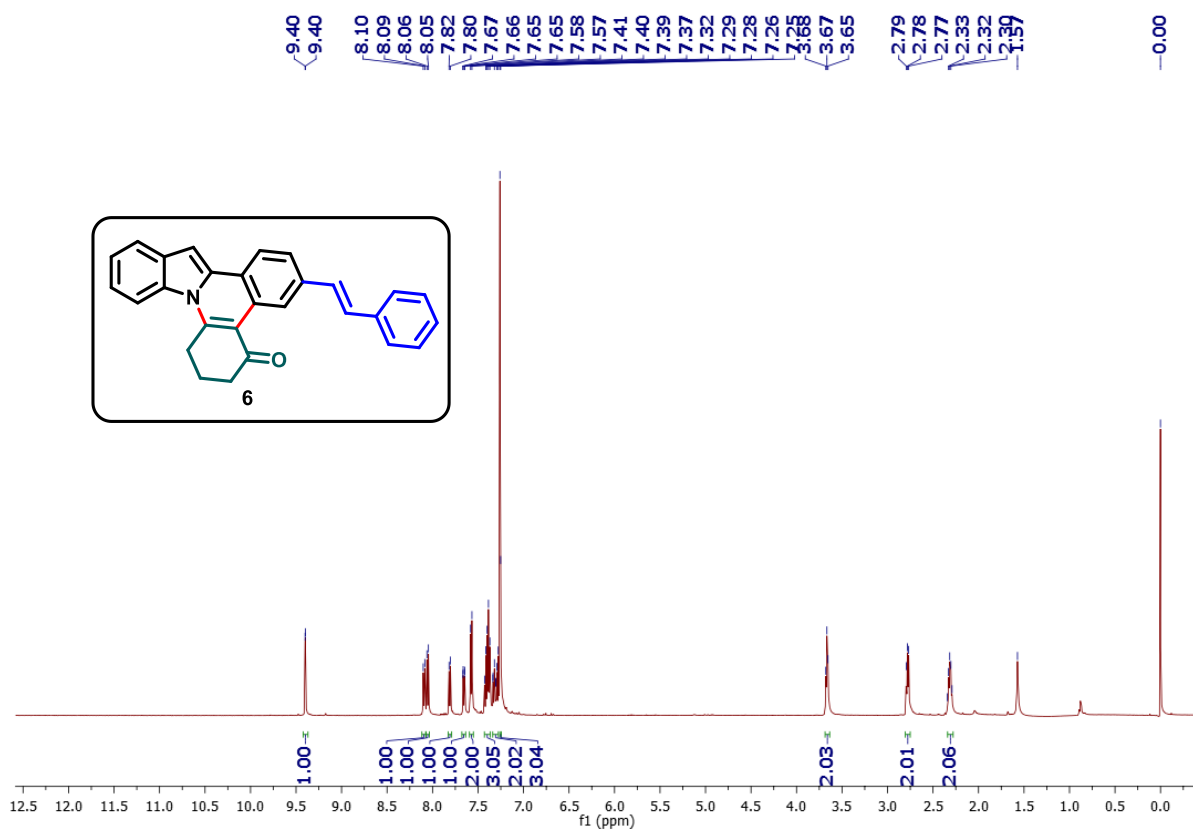

<sup>1</sup>H NMR of compound **6** (500 MHz, CDCl<sub>3</sub>)

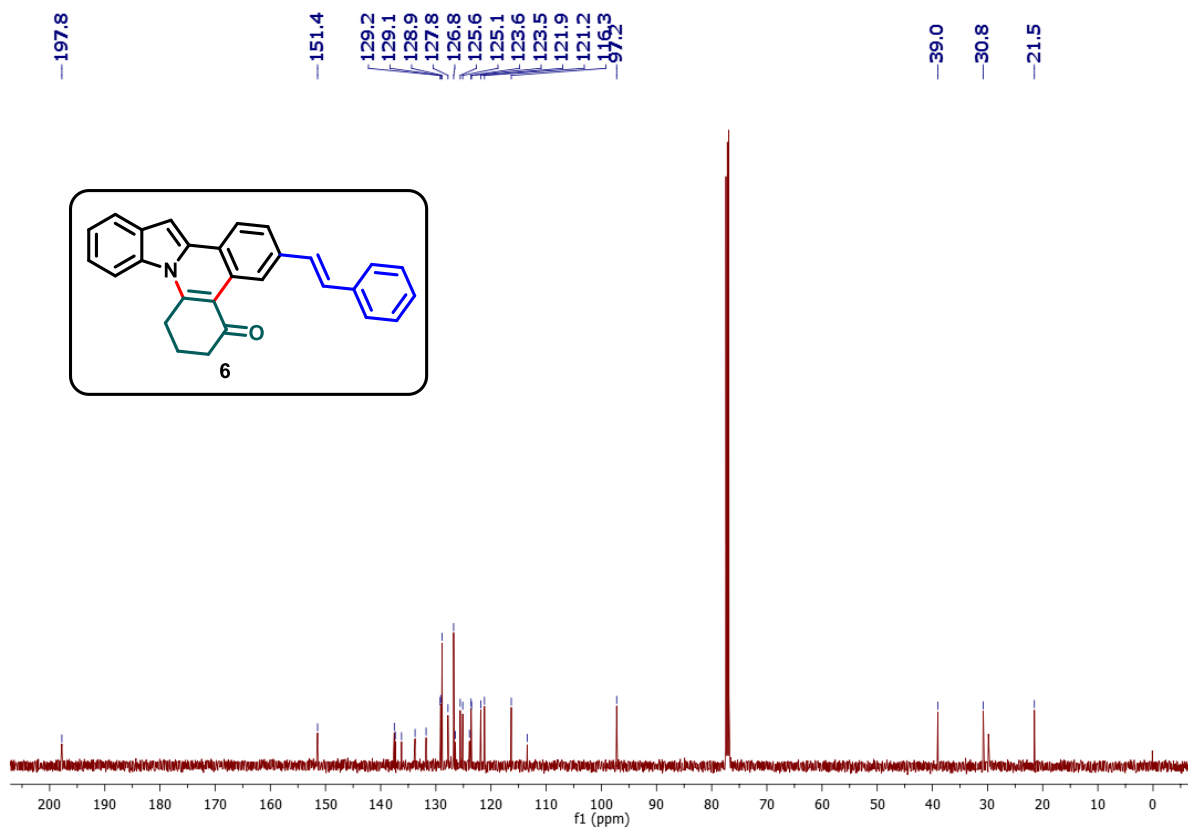

<sup>13</sup>C NMR of compound **6** (126 MHz, CDCl<sub>3</sub>)

ethyl (*E*)-3-(5-oxo-5,6,7,8-tetrahydroindolo[1,2-*f*]phenanthridin-14-yl)acrylate (7):

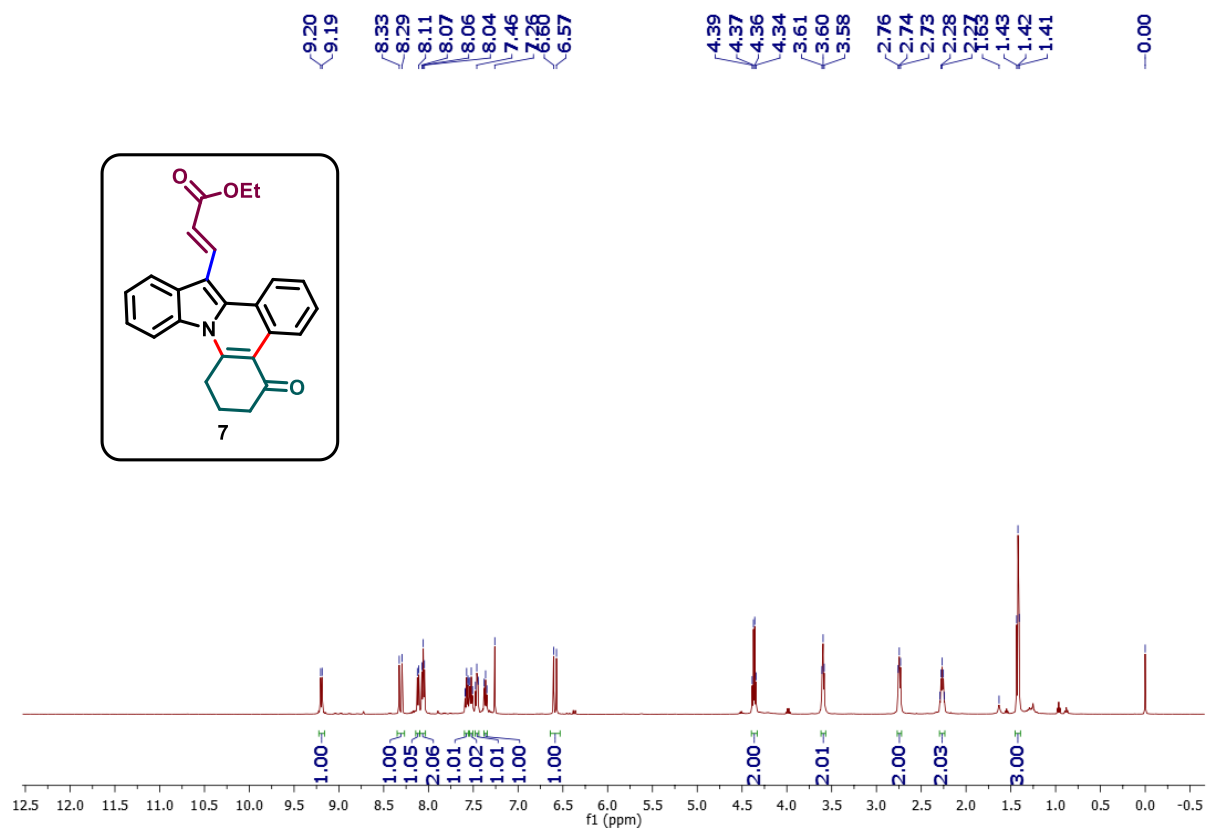

<sup>1</sup>H NMR of compound 7 (500 MHz, CDCl<sub>3</sub>)

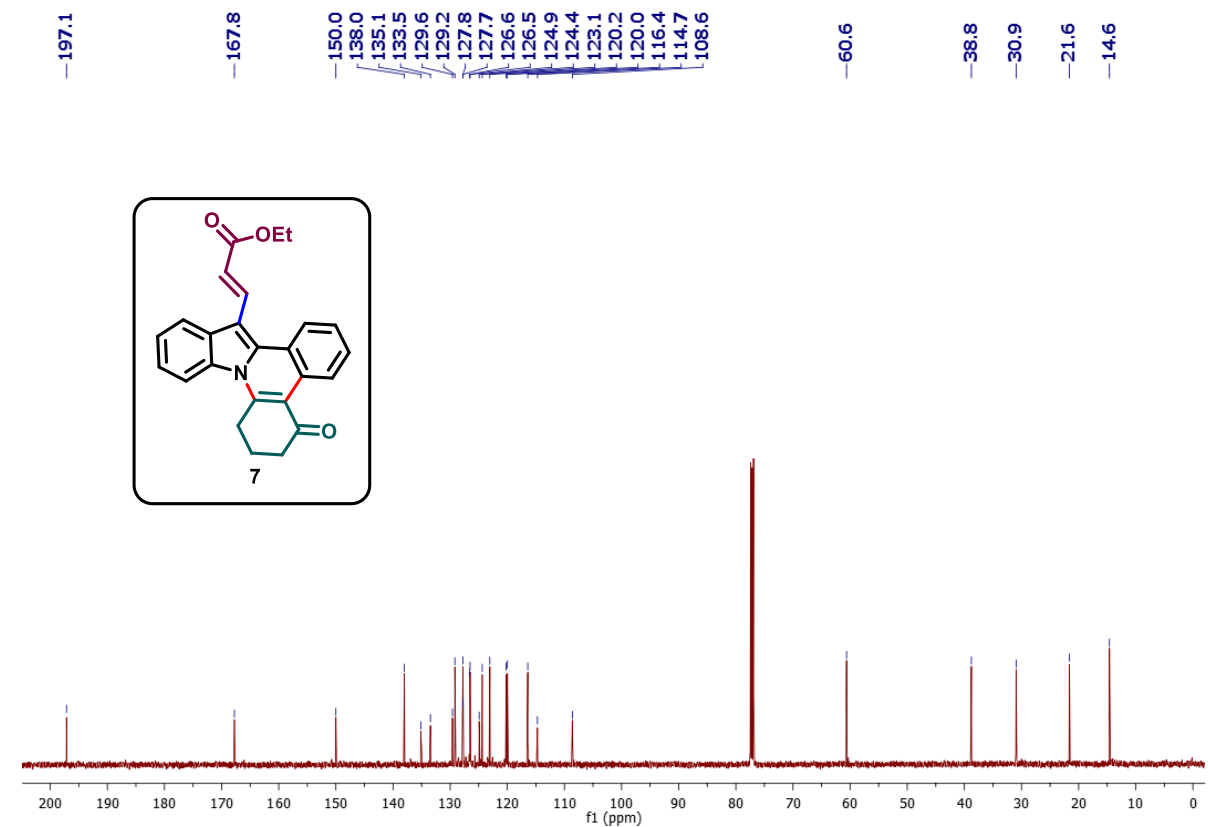

<sup>13</sup>C NMR of compound 7 (126 MHz, CDCl<sub>3</sub>)

14-((2-bromophenyl)(3,5-di-tert-butyl-4-hydroxyphenyl)methyl)-7,8-dihydroindolo[1,2-*f*]phenanthridin-5(6*H*)-one (**8**):

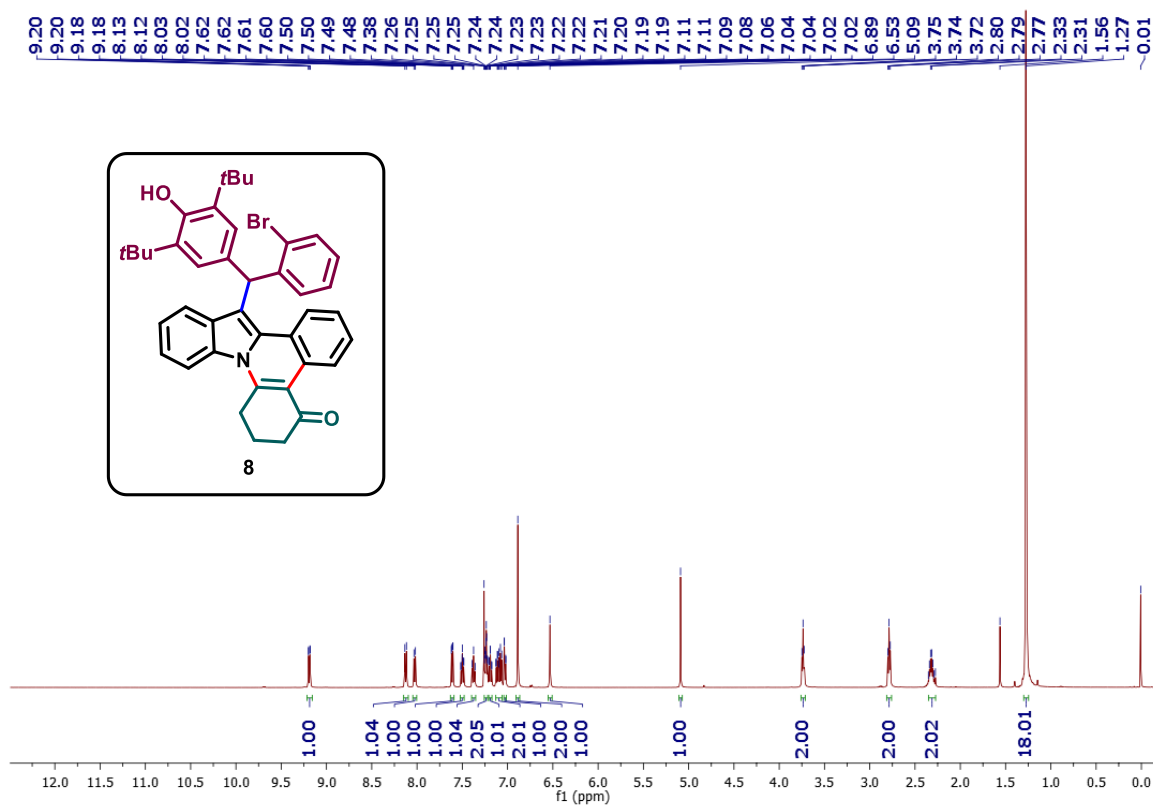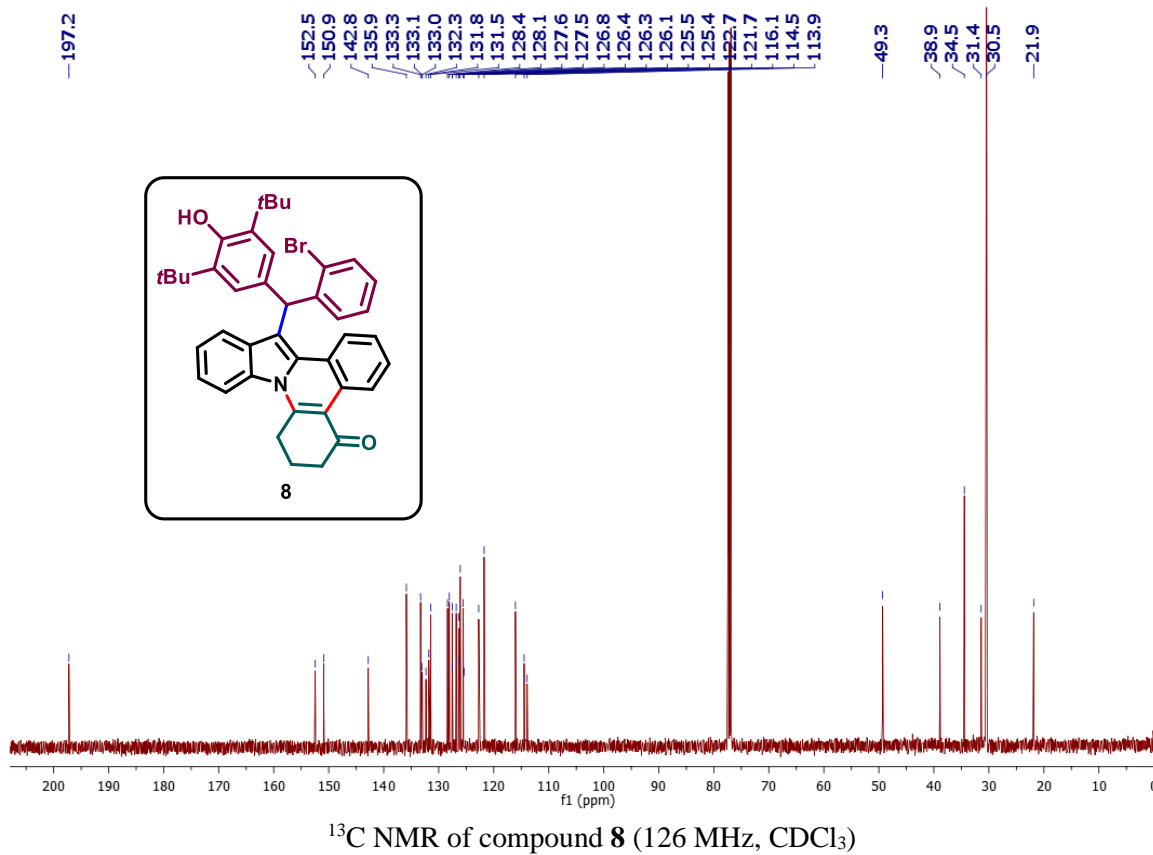

**14-methyl-5,6,7,8-tetrahydroindolo[1,2-f]phenanthridine (9):**

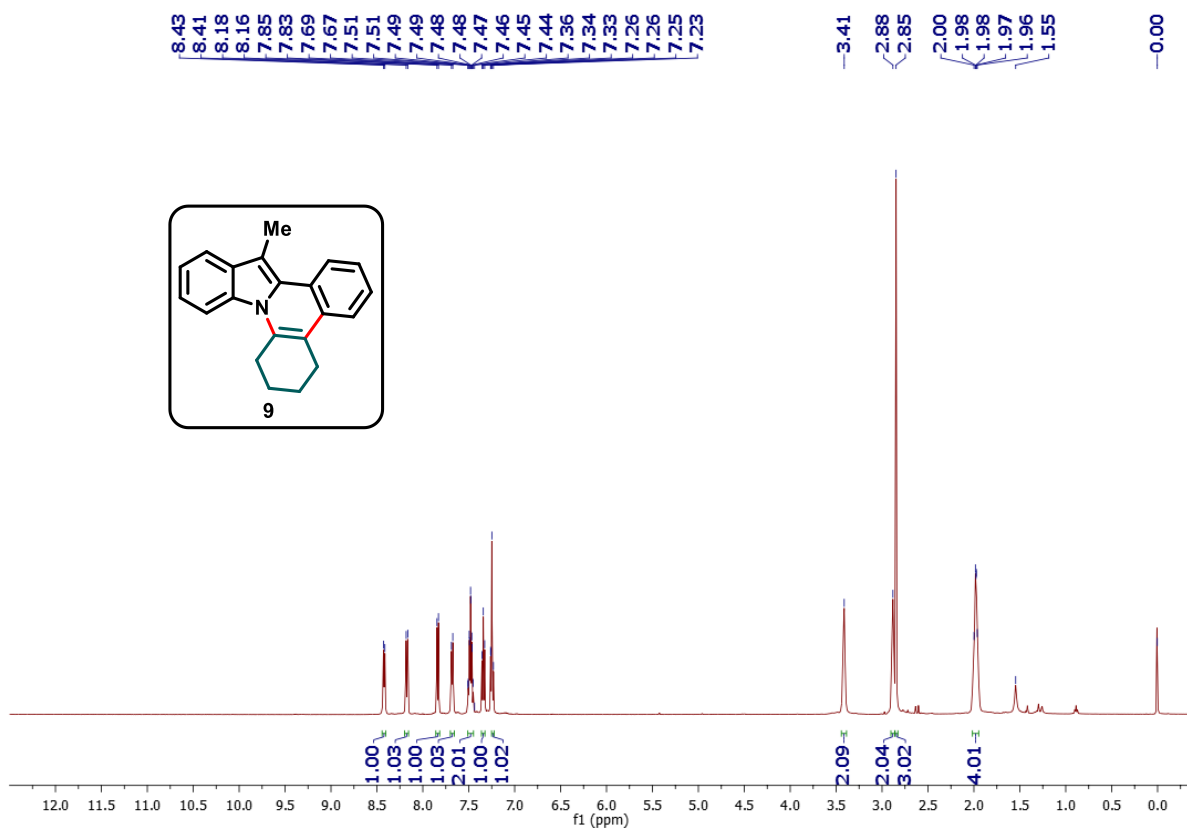

<sup>1</sup>H NMR of compound **9** (500 MHz, CDCl<sub>3</sub>)

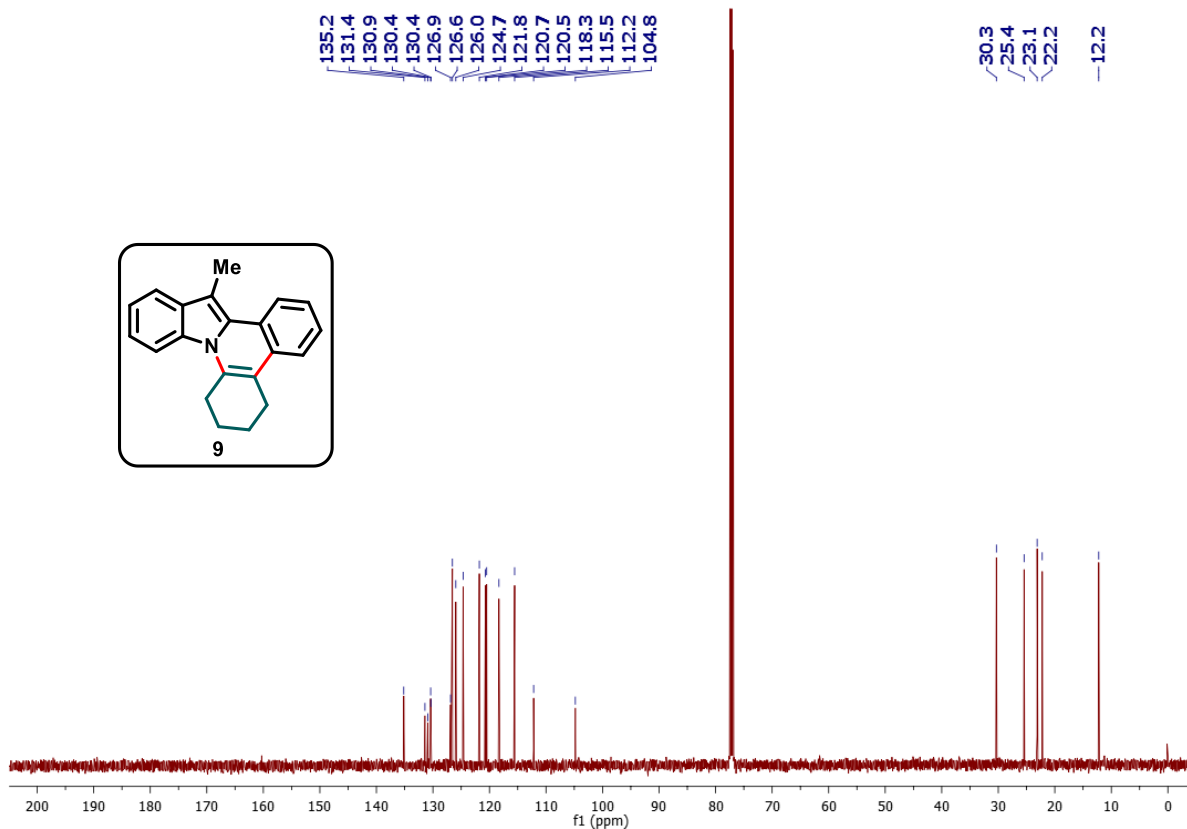

<sup>13</sup>C NMR of compound **9** (126 MHz, CDCl<sub>3</sub>)

7,8-dihydroindolo[1,2-f]phenanthridin-5(6H)-one-1,2,3,4-*d*<sub>4</sub> (**3a-*d*<sub>4</sub>**):

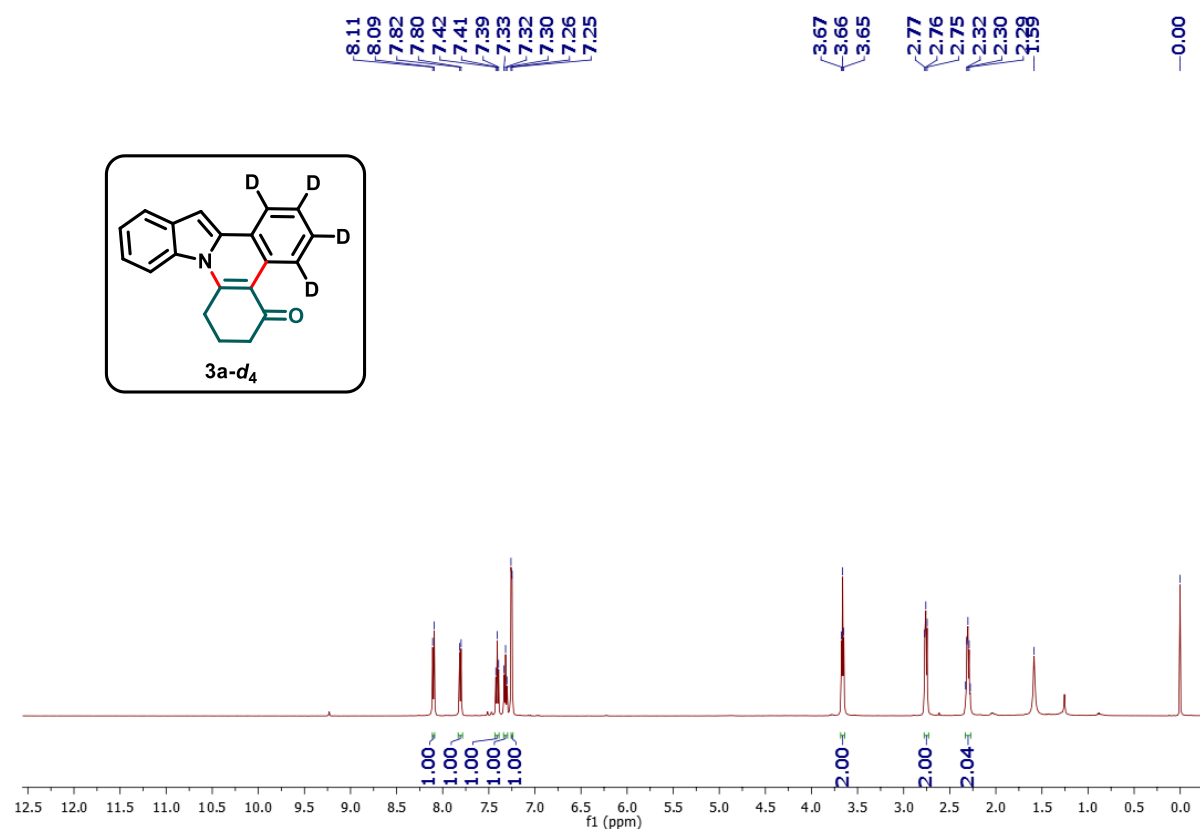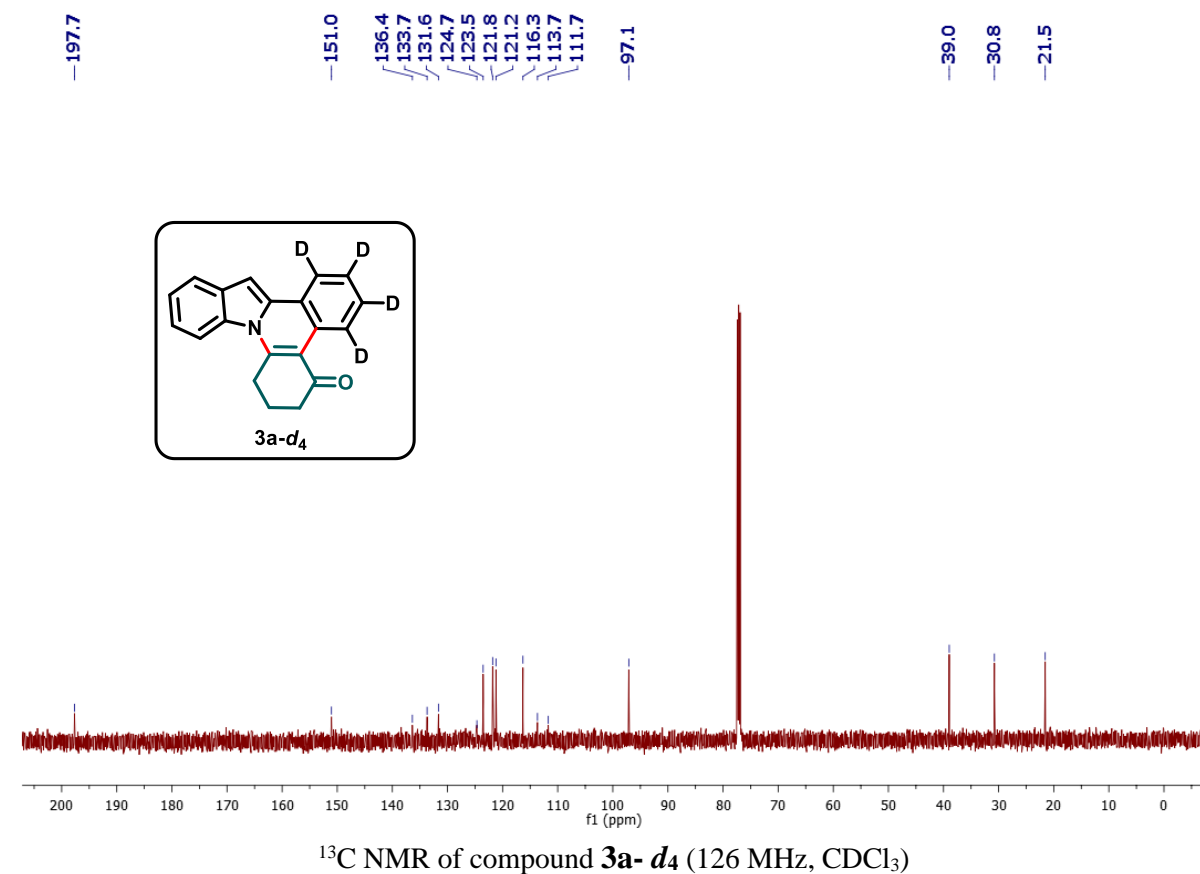

1,2,3,9-tetrahydro-4*H*-dibenzo[*a,c*]carbazol-4-one-5,6,7,8-*d*<sub>4</sub> (**4a-d<sub>4</sub>**):

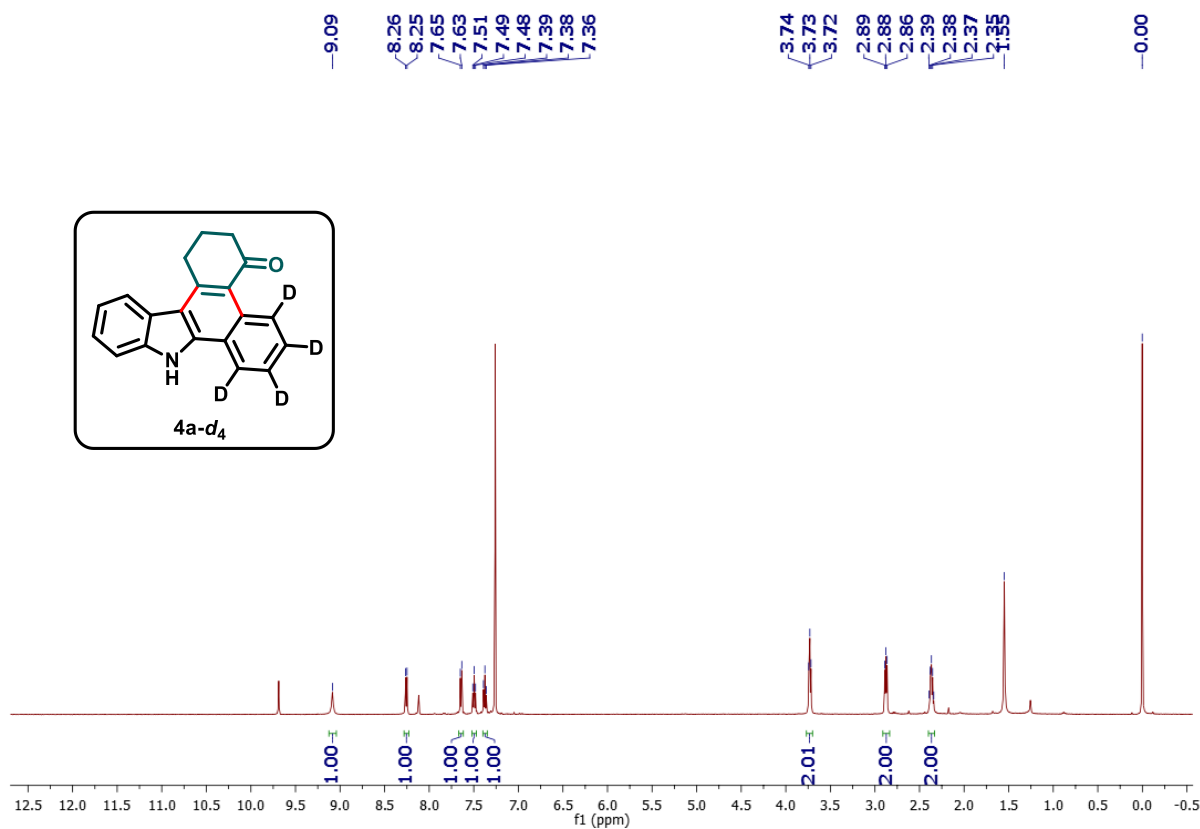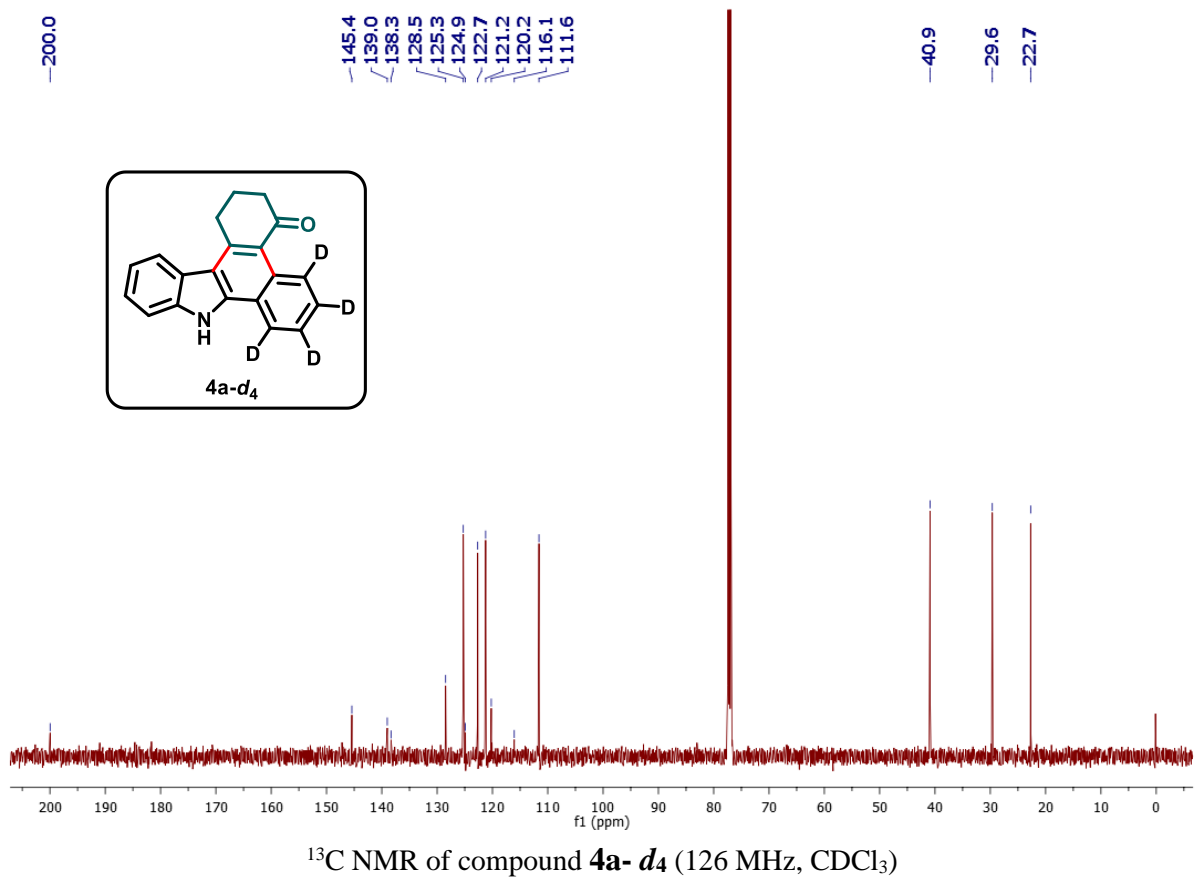

Supplement: d2cc01386j1.pdf [file d2cc01386j1.pdf]
